# Supplementary material for: Identification of YWHAH as a Novel Brain-Derived Extracellular Vesicle Marker Post Long-Term Midazolam Exposure during Early Development
Source: Cells. 2023 Mar 22;12(6):966. doi: 10.3390/cells12060966 (PMC10047367; doi:10.3390/cells12060966)
Supplement: Supplementary file 1 [file cells-12-00966-s001.zip]

Archive with 9 entries (8 files):
- !Supplemental files/
- !Supplemental files/Table S1.xlsx
- !Supplemental files/.DS_Store
- __MACOSX/!Supplemental files/._.DS_Store
- !Supplemental files/BDEV Supplemental Figures.pdf
- !Supplemental files/Table S4.xlsx
- __MACOSX/!Supplemental files/._Table S4.xlsx
- !Supplemental files/Table S3.xlsx
- !Supplemental files/Table S2.xlsx
