# Supplementary material for: Identification of YWHAH as a Novel Brain-Derived Extracellular Vesicle Marker Post Long-Term Midazolam Exposure during Early Development
Source: Cells. 2023 Mar 22;12(6):966. doi: 10.3390/cells12060966 (PMC10047367; doi:10.3390/cells12060966)
Supplement: Supplementary file 1 [file cells-12-00966-s001.zip › !Supplemental files/Table S1.xlsx]

## Sheet: Sal vs MDZ BDEV
Accession	Peptide count	Unique peptides	Confidence score	Anova (p)	q Value	Max fold change	Mass	Description	S1	S2	S3	S4	S5	S6	M1	M2	M3	M4	M5	M6
P25409|ALAT1_RAT	1	1	46.09	0.000182045	0.605845	32.1065	55109.5	Alanine aminotransferase 1 OS=Rattus norvegicus OX=10116 GN=Gpt PE=1 SV=2	6041.4	1584.25	18023.5	3255.96	17633.8	8191.76	0	0	0	0	0	1704.66
P17046|LAMP2_RAT	3	2	119.02	0.00852613	0.999949	1.9094	45155.8	Lysosome-associated membrane glycoprotein 2 OS=Rattus norvegicus OX=10116 GN=Lamp2 PE=1 SV=3	96456.2	371781	305866	231521	195851	176975	371311	406321	481743	452555	617412	302664
tr|B2RYJ6|B2RYJ6_RAT;tr|D3ZS76|D3ZS76_RAT	2	2	67.75	0.00869577	0.999949	12.1006	27388.3	Tetratricopeptide repeat domain 9 OS=Rattus norvegicus OX=10116 GN=Ttc9 PE=1 SV=1	55.6886	736.176	473.905	559.265	241.04	134.211	646.452	2534.25	2385.55	938.511	18917	1203.08
Q920Q0|PALM_RAT	11	8	595.17	0.00966137	0.999949	5.43265	41926.8	Paralemmin-1 OS=Rattus norvegicus OX=10116 GN=Palm PE=1 SV=1	659788	35294.4	311411	315769	523835	341593	91414.3	62692.5	50268.1	31190.1	91281.6	75846.2
tr|A0A0G2JYY8|A0A0G2JYY8_RAT	12	1	477.22	0.0103014	0.999949	10.8903	35855.9	Gp_dh_N domain-containing protein OS=Rattus norvegicus OX=10116 PE=1 SV=1	77678.2	2777.33	117880	37470.9	18065.7	39338.8	253.907	2171.42	2002.33	5272.69	4630.2	12593.4
tr|Q14U74|Q14U74_RAT	1	1	38.61	0.0130765	0.999949	14.3653	92729.1	Dolichyl-phosphate-mannose--protein mannosyltransferase OS=Rattus norvegicus OX=10116 GN=Pomt2 PE=2 SV=1	0	448.01	293.793	10.4661	17.6793	0	867.978	456.636	159.196	1175.7	8119.61	281.397
Q9WTT2|CLPB_RAT;tr|A0A0G2K3V9|A0A0G2K3V9_RAT;tr|Q6IRH7|Q6IRH7_RAT	2	1	68.46	0.0138953	0.999949	13.5452	75702.4	Caseinolytic peptidase B protein homolog OS=Rattus norvegicus OX=10116 GN=Clpb PE=2 SV=1	79.6586	8845.16	4576.6	43.6153	1177.65	590.085	63235	68660.4	1412.88	8441.81	57664.9	7999.79
Q9WVR6|LAT2_RAT	2	2	53.27	0.0164372	0.999949	11.2511	58190.4	Large neutral amino acids transporter small subunit 2 OS=Rattus norvegicus OX=10116 GN=Slc7a8 PE=1 SV=1	235.023	1227.86	917.634	450.223	6238.36	539.912	5799.83	1920.65	3372.44	2907.23	81935.6	12175.9
P63142|KCNA2_RAT	3	1	123.46	0.017387	0.999949	7.66371	56700.8	Potassium voltage-gated channel subfamily A member 2 OS=Rattus norvegicus OX=10116 GN=Kcna2 PE=1 SV=1	1939.55	982.599	4719.44	1026.85	17594.2	7001.81	619.767	39.7921	24.3295	2011.11	1505.85	139.669
Q7M0E3|DEST_RAT	11	8	527.08	0.0176087	0.999949	2.58131	18533.6	Destrin OS=Rattus norvegicus OX=10116 GN=Dstn PE=1 SV=3	1.58104e+06	694560	776961	1.8449e+06	1.9126e+06	2.2366e+06	636131	387040	443459	595918	121502	1.32063e+06
tr|A0A0G2K695|A0A0G2K695_RAT;tr|D4ACN7|D4ACN7_RAT	1	1	23	0.018862	0.999949	17.1852	234616	Myoferlin OS=Rattus norvegicus OX=10116 GN=Myof PE=1 SV=1	0	0	27.3227	13.7911	0.84125	176.117	90.3884	49.2006	65.3789	71.6218	3361.93	109.102
Q62940|NEDD4_RAT;tr|A0A0G2K0B4|A0A0G2K0B4_RAT;tr|A0A0G2K8P3|A0A0G2K8P3_RAT	4	3	163.42	0.0192179	0.999949	2.00937	102395	E3 ubiquitin-protein ligase NEDD4 OS=Rattus norvegicus OX=10116 GN=Nedd4 PE=1 SV=1	20430.3	42789.1	30391.8	27903.2	24163.5	16221.6	52661.5	56638.1	20189.2	47919.2	73190.6	74716.6
tr|G3V7Q7|G3V7Q7_RAT	3	2	85.2	0.0195686	0.999949	5.52308	188831	IQ motif containing GTPase activating protein 1 (Predicted), isoform CRA_b OS=Rattus norvegicus OX=10116 GN=Iqgap1 PE=1 SV=1	883.681	489.89	1101.34	1098.65	94.8096	3974.2	294.711	0.0594296	0.00850196	48.2479	1039.93	0.791305
Q0ZHH6|ATLA3_RAT;tr|A0A0G2JSS9|A0A0G2JSS9_RAT	2	1	76.72	0.0197383	0.999949	17.6725	60586	Atlastin-3 OS=Rattus norvegicus OX=10116 GN=Atl3 PE=2 SV=2	1.84936	1.79992	0.505845	453.039	1101.82	1.86099	130.468	326.838	19667.6	92.9085	1430.22	5936.51
Q6AYT5|ARMT1_RAT	1	1	24.94	0.0226262	0.999949	32.0697	50183.5	Damage-control phosphatase ARMT1 OS=Rattus norvegicus OX=10116 GN=Armt1 PE=1 SV=1	16.2356	25.226	1771.3	3.09577	8.94119	21.5231	2263.42	66.3347	91.6187	870.867	54306.8	1611.87
Q924S5|LONM_RAT	3	2	85.11	0.0232073	0.999949	2.99056	105792	Lon protease homolog, mitochondrial OS=Rattus norvegicus OX=10116 GN=Lonp1 PE=2 SV=1	26237	58197.4	26658.5	36465.3	40253.8	4884.18	94475.1	167478	39065.4	38628.5	96338.6	140283
P62703|RS4X_RAT;tr|A0A0H2UHX3|A0A0H2UHX3_RAT;tr|X1WI37|X1WI37_RAT	6	5	241.32	0.0254983	0.999949	4.07133	29597.7	40S ribosomal protein S4, X isoform OS=Rattus norvegicus OX=10116 GN=Rps4x PE=2 SV=2	58641.1	48650.3	34949.3	300228	106765	279634	2819.64	21002.4	5412.21	86227.3	6038.27	82086.8
P52631|STAT3_RAT	1	1	45.19	0.0273201	0.999949	214.788	88039.8	Signal transducer and activator of transcription 3 OS=Rattus norvegicus OX=10116 GN=Stat3 PE=1 SV=1	26.5544	0	16.6862	0	0	0	78.4911	65.4062	70.9359	0	8850.48	222.256
P63025|VAMP3_RAT	6	2	337.13	0.0287034	0.999949	2.30421	11480.3	Vesicle-associated membrane protein 3 OS=Rattus norvegicus OX=10116 GN=Vamp3 PE=1 SV=1	133359	38423.9	137566	78020.4	165668	180465	23744.9	39092.9	41755	27402.6	110577	75759.2
tr|A0A0G2JZI2|A0A0G2JZI2_RAT	10	9	440.1	0.0295901	0.999949	14.2763	169860	Glutamyl-tRNA synthetase OS=Rattus norvegicus OX=10116 GN=Eprs PE=1 SV=1	782.508	866.585	1695.84	7960.71	1080.32	2131.75	2035.47	39631.9	44916.3	3364.3	114622	2688.85
tr|G3V674|G3V674_RAT;tr|Q5XIN0|Q5XIN0_RAT	3	2	96.03	0.030503	0.999949	1.88922	28487.9	Claudin domain containing 1, isoform CRA_b OS=Rattus norvegicus OX=10116 GN=Cldnd1 PE=1 SV=1	14980.4	29087.6	21744.4	8328.3	3785.68	17038.1	25080.2	29247	46378.2	28692.7	24839.2	25171.7
tr|D3ZUN5|D3ZUN5_RAT	3	3	110.9	0.0305249	0.999949	20.6122	49543.5	Peptide-O-fucosyltransferase OS=Rattus norvegicus OX=10116 GN=Pofut2 PE=1 SV=1	930.627	272.754	19.8779	1078.13	504.699	430.702	913.186	1833.84	22134.9	303.212	6389.24	35143.1
tr|D3ZPE5|D3ZPE5_RAT	3	3	67.83	0.0312201	0.999949	8.19563	94429.1	Vacuolar protein sorting-associated protein 53 homolog OS=Rattus norvegicus OX=10116 GN=Vps53 PE=1 SV=1	315.747	431.569	658.768	143.845	2610.03	373.09	520.188	2524.08	3217.52	1039.81	27189.7	2659.89
P29995|ITPR2_RAT;tr|Q6W3E4|Q6W3E4_RAT	16	9	651.44	0.0312309	0.999949	2.07401	307057	Inositol 1,4,5-trisphosphate receptor type 2 OS=Rattus norvegicus OX=10116 GN=Itpr2 PE=1 SV=1	7065.26	8843.86	6374.91	7184.07	14488.1	4278.51	7673.11	18515.1	27445.2	7557.71	18476.6	20371.7
tr|F1M9C9|F1M9C9_RAT;tr|Q5EB72|Q5EB72_RAT	2	1	50.91	0.0315111	0.999949	4.08006	57327.8	Histidine--tRNA ligase OS=Rattus norvegicus OX=10116 GN=Hars2 PE=1 SV=1	43.6442	382.12	1075.59	548.48	748.016	277.417	1218.41	1113.38	3429.01	346.051	4188.11	2252.32
tr|A0A096MJP9|A0A096MJP9_RAT	1	1	28.64	0.0328185	0.999949	90.0094	106033	DNA damage-inducible 1 homolog 2 OS=Rattus norvegicus OX=10116 GN=Ddi2 PE=1 SV=1	0	43.9984	0	0.00476467	0	0	5.85554	61.2089	23.815	189.118	3680.7	0
P21932|ADCY3_RAT;tr|G3V6I2|G3V6I2_RAT	2	2	41.77	0.0328695	0.999949	2.23011	128936	Adenylate cyclase type 3 OS=Rattus norvegicus OX=10116 GN=Adcy3 PE=1 SV=1	59719.6	87633.2	70446.5	13393.8	10994.5	8225.5	89692.9	103644	133507	108033	83437.2	40134.2
tr|G3V8K2|G3V8K2_RAT	9	9	549.1	0.0329258	0.999949	3.98622	8304.75	Guanine nucleotide-binding protein subunit gamma OS=Rattus norvegicus OX=10116 GN=Gng3 PE=1 SV=1	971254	392816	1.22019e+06	312525	326701	2.56472e+06	274153	222110	124143	490961	22350.2	318336
tr|D4A2G9|D4A2G9_RAT	1	1	26.29	0.0331401	0.999949	2.8427	23596.4	RAN-binding protein 1 OS=Rattus norvegicus OX=10116 GN=Ranbp1 PE=1 SV=1	228.327	9359.82	59628.5	110.002	852.222	219.109	12846.8	8956.93	45568.3	20495.5	108353	3899.73
P28037|AL1L1_RAT	21	16	878.12	0.0360326	0.999949	2.36223	98874.3	Cytosolic 10-formyltetrahydrofolate dehydrogenase OS=Rattus norvegicus OX=10116 GN=Aldh1l1 PE=1 SV=3	129989	977265	690116	216953	244328	338513	36418	103415	91779.9	807584	35149.7	25106.8
tr|F1M0G0|F1M0G0_RAT	1	1	25.49	0.0393896	0.999949	6.35974	24320.4	Regulator of G-protein signaling 17 (Predicted), isoform CRA_a OS=Rattus norvegicus OX=10116 GN=Rgs17 PE=4 SV=2	6504.71	1690.53	1312.29	5783.77	6302.76	1949.29	5823.3	15284.6	31453.3	3020.74	87896.1	6251.65
Q6AYK8|EIF3D_RAT	1	1	27.46	0.0396638	0.999949	9.27026	63988.9	Eukaryotic translation initiation factor 3 subunit D OS=Rattus norvegicus OX=10116 GN=Eif3d PE=1 SV=1	0	3467.42	8295.62	333.513	288.985	20.4337	22358.5	834.336	2445.65	3570.43	66913.8	18883.8
tr|A0A0U1RRT8|A0A0U1RRT8_RAT;tr|B5DFG5|B5DFG5_RAT	11	5	506.47	0.0402487	0.999949	2.24359	49409.5	Septin OS=Rattus norvegicus OX=10116 GN=Sept6 PE=1 SV=1	367016	215441	528503	401373	924891	737442	298739	365990	350048	238577	107815	53825.3
Q811Q2|CLIC6_RAT;tr|A0A0G2JTB6|A0A0G2JTB6_RAT;tr|F1M9X4|F1M9X4_RAT	4	1	185.48	0.040629	0.999949	2.86332	64687	Chloride intracellular channel protein 6 OS=Rattus norvegicus OX=10116 GN=Clic6 PE=1 SV=1	106.891	2392.08	2563.69	271.32	1046.49	18.5613	4499.18	2613.76	1810.09	3020.05	5205.66	1173.71
Q923W4|HDGR3_RAT	1	1	21.68	0.0412724	0.999949	8.99733	22446.5	Hepatoma-derived growth factor-related protein 3 OS=Rattus norvegicus OX=10116 GN=Hdgfl3 PE=1 SV=1	4.44182	56.0272	121.004	0	88.4783	2.38968	45.6861	29.5075	149.536	1044.96	90.5657	1090.08
tr|B1WC67|B1WC67_RAT	3	2	100.01	0.0413111	0.999949	3.56068	52891	RCG29001 OS=Rattus norvegicus OX=10116 GN=Slc25a24 PE=1 SV=1	75.7954	2466.37	4354.23	249.411	489.094	533.124	4873.79	808.231	1765.67	2383.81	11505.2	7746.98
Q62888|NLGN2_RAT;tr|A0A0U1RRX0|A0A0U1RRX0_RAT;tr|F1LQ41|F1LQ41_RAT	3	1	147.16	0.0413807	0.999949	2.34846	90961	Neuroligin-2 OS=Rattus norvegicus OX=10116 GN=Nlgn2 PE=1 SV=1	5491.16	7348.88	5363.18	9469.11	4617.54	2372.41	9601.39	9524.78	17585	7081.79	31893.4	5716.7
tr|D3ZS72|D3ZS72_RAT	4	4	127.1	0.0425491	0.999949	6.8419	184391	Phosphatidylinositol-3,4,5-trisphosphate-dependent Rac exchange factor 1 OS=Rattus norvegicus OX=10116 GN=Prex1 PE=1 SV=3	7445.34	1500.25	1418.02	1388.26	2470.49	2419.19	13037.1	997.956	23265.6	4588.73	61384.8	10585.5
tr|A1L122|A1L122_RAT;tr|F1M7W7|F1M7W7_RAT	2	2	85.05	0.0429025	0.999949	1.90617	60351.7	NEDD8-activating enzyme E1 regulatory subunit OS=Rattus norvegicus OX=10116 GN=Nae1 PE=2 SV=1	38027.4	9528.91	21605.1	12391.2	24800.6	17903.7	7471.58	486.117	1077.12	8972.47	46567.6	611.968
Q5BJT2|UBL3_RAT	2	2	63.63	0.0435885	0.999949	3.65232	13180.1	Ubiquitin-like protein 3 OS=Rattus norvegicus OX=10116 GN=Ubl3 PE=3 SV=1	2833.22	1573.41	1097.17	626.568	3933.17	1309.59	2807.62	4055.31	12576.9	979.694	7480.01	13638.7
Q64566|AT2C1_RAT;tr|F1M281|F1M281_RAT;tr|F1M9B5|F1M9B5_RAT;tr|Q5PQW5|Q5PQW5_RAT	11	6	402.93	0.043594	0.999949	4.56509	100500	Calcium-transporting ATPase type 2C member 1 OS=Rattus norvegicus OX=10116 GN=Atp2c1 PE=2 SV=1	22547.1	19151.9	19303.9	6344.51	35511.9	3569.58	11267.7	31461.5	163776	22104.1	151880	105368
tr|Q5BK21|Q5BK21_RAT	2	2	64.18	0.0436213	0.999949	3.50098	46445	Transmembrane 7 superfamily member 2 OS=Rattus norvegicus OX=10116 GN=Tm7sf2 PE=1 SV=1	21383.2	43159.6	58061.7	22130.6	18102.6	46457.3	63768.9	78682	396432	88087.8	23544.8	82222.4
tr|D3ZN19|D3ZN19_RAT	1	1	48.08	0.043895	0.999949	6.22523	37972.6	Ring finger protein 121 OS=Rattus norvegicus OX=10116 GN=Rnf121 PE=1 SV=1	19392.5	19988	211474	81635.9	9280.22	183236	3944.44	10996.4	11343.1	12921.5	29160.2	15969.6
tr|A0A096MIX9|A0A096MIX9_RAT;tr|A0A096MJN4|A0A096MJN4_RAT;tr|A0A096MJT3|A0A096MJT3_RAT;tr|A0A096MJW0|A0A096MJW0_RAT;tr|A0A0G2JVC7|A0A0G2JVC7_RAT;tr|A0JN02|A0JN02_RAT;tr|E9PST0|E9PST0_RAT;tr|Q5I0G8|Q5I0G8_RAT;tr|Q6XUZ6|Q6XUZ6_RAT;tr|Q6XUZ7|Q6XUZ7_RAT	4	2	157.21	0.0455775	0.999949	3.3427	18052.7	Septin 4 (Fragment) OS=Rattus norvegicus OX=10116 GN=Sept4 PE=1 SV=6	1617.4	1066.49	1884.08	465.245	59.0033	185.951	1277.98	1535.33	1476.88	1126.42	8021.81	4204.89
tr|A0A096MKB1|A0A096MKB1_RAT	1	1	30.41	0.0458326	0.999949	2.84704	25473.1	G protein-coupled receptor 180 (Fragment) OS=Rattus norvegicus OX=10116 GN=Gpr180 PE=1 SV=1	13592.4	31841.1	8835.04	7391.54	8877.03	27818.4	21885.4	34190.9	93413.3	39327.9	80955	10250
Q02874|H2AY_RAT;tr|A0A140TAB4|A0A140TAB4_RAT	1	1	30.44	0.0466972	0.999949	135.815	39503.9	Core histone macro-H2A.1 OS=Rattus norvegicus OX=10116 GN=Macroh2a1 PE=1 SV=4	32.2253	21.5174	70.0315	61.739	532.241	6.37715	1540.15	52.0013	389.005	708.447	95552.2	105.844
tr|A0A0G2JYD6|A0A0G2JYD6_RAT;tr|Q7TP49|Q7TP49_RAT	1	1	41.06	0.0478626	0.999949	9.49961	58021.9	Major facilitator superfamily domain-containing 8 OS=Rattus norvegicus OX=10116 GN=Mfsd8 PE=4 SV=1	36647.7	64905.3	21540.4	61677.2	43297.5	1470.07	38741.1	1.39353e+06	502797	51454.4	112102	81896.5
tr|G3V7G9|G3V7G9_RAT	2	2	53.51	0.0486007	0.999949	3.86201	45082.2	Eukaryotic translation initiation factor 3, subunit 6 interacting protein OS=Rattus norvegicus OX=10116 GN=Eif3l PE=1 SV=2	80496.5	60156.6	111415	538126	555525	499959	77733.7	86756.5	102070	74287.4	78435.4	58624.3
O55166|VPS52_RAT;tr|B2GUV2|B2GUV2_RAT	2	2	47.76	0.0491153	0.999949	17.3467	82103.1	Vacuolar protein sorting-associated protein 52 homolog OS=Rattus norvegicus OX=10116 GN=Vps52 PE=1 SV=2	287.534	542.783	1399.37	52.5232	1563.09	193.211	801.156	5578.67	1900.49	366.808	58398.7	3008.86
P68511|1433F_RAT	28	2	1405.32	0.0506152	0.999949	3.27423	28211.7	14-3-3 protein eta OS=Rattus norvegicus OX=10116 GN=Ywhah PE=1 SV=2	1.79399e+06	692354	164088	1.66011e+06	1.97561e+06	2.01456e+06	816315	834300	126484	344838	100726	312505
Q6Q0N1|CNDP2_RAT	10	9	521.23	0.0511405	0.999949	2.00203	52693.2	Cytosolic non-specific dipeptidase OS=Rattus norvegicus OX=10116 GN=Cndp2 PE=1 SV=1	138845	81968.2	141965	214820	392112	312959	134432	156791	109798	83665.6	61773	94225.3
tr|Q6V9V9|Q6V9V9_RAT	2	1	74.18	0.051896	0.999949	2.03445	48157.8	Serine/threonine kinase 25 OS=Rattus norvegicus OX=10116 GN=Stk25 PE=1 SV=1	7127.26	99.2165	894.905	1076.36	2244.48	531.607	377.341	0	176.176	0	0	5332.02
tr|D3ZC89|D3ZC89_RAT	1	1	27.09	0.0539343	0.999949	5.78006	54455.2	Uncharacterized protein OS=Rattus norvegicus OX=10116 PE=1 SV=3	1817.41	496.136	1012.07	2204.86	1453.65	310.356	1649.53	3701.41	12597.4	1002.3	21772.7	1439.2
G3V9D0|PGLT1_RAT;tr|A0A140TAF7|A0A140TAF7_RAT	3	3	102.55	0.0559518	0.999949	2.09791	46509.7	Protein O-glucosyltransferase 1 OS=Rattus norvegicus OX=10116 GN=Poglut1 PE=3 SV=1	5854.56	57975.1	34035.9	2258.91	45430.5	1778.3	61764.8	40694.7	87337.9	36371.8	25286.8	57635.6
P36876|2ABA_RAT	6	5	322.44	0.0562147	0.999949	2.3393	51678.1	Serine/threonine-protein phosphatase 2A 55 kDa regulatory subunit B alpha isoform OS=Rattus norvegicus OX=10116 GN=Ppp2r2a PE=2 SV=1	108056	19068	43936.3	68797.4	94519.7	22196.3	29981.4	5643.63	6560.77	15989.8	13063.8	81188.3
P12007|IVD_RAT	7	5	266.46	0.0572423	0.999949	3.71597	46435.5	Isovaleryl-CoA dehydrogenase, mitochondrial OS=Rattus norvegicus OX=10116 GN=Ivd PE=1 SV=2	266835	19106.8	36217.9	87739.6	33876.2	155273	48672.4	53694.7	23667.9	19509.8	4398.27	11266.2
tr|A0A0G2K6N9|A0A0G2K6N9_RAT	1	1	22.27	0.0581662	0.999949	73.5419	21867.3	COMM domain containing 4 (Predicted), isoform CRA_c OS=Rattus norvegicus OX=10116 GN=Commd4 PE=1 SV=1	0	54.3716	308.982	173.13	130.397	25.4022	1734.82	213.865	37.0111	766.792	47754.1	405.24
tr|D3ZA93|D3ZA93_RAT	1	1	34.88	0.0582233	0.999949	4.70502	15269.9	Acyl-CoA thioesterase 13 OS=Rattus norvegicus OX=10116 GN=Acot13 PE=1 SV=1	0	3530.59	19584.9	0	711.607	0	12854.9	127.13	5414.16	1099.3	61054.9	31556.9
Q5U1Y4|AKCL2_RAT	2	1	89.7	0.0602928	0.999949	2.11356	34499.9	1,5-anhydro-D-fructose reductase OS=Rattus norvegicus OX=10116 GN=Akr1e2 PE=2 SV=1	672.651	529.033	1544.51	90.9484	599.929	161.933	1436.73	805.835	1259.88	680.344	2681.99	741.931
tr|D3ZFF4|D3ZFF4_RAT	2	2	96.7	0.0613089	0.999949	2.83276	44566.3	Lysocardiolipin acyltransferase 1 OS=Rattus norvegicus OX=10116 GN=Lclat1 PE=1 SV=1	104407	98124.8	249339	673392	565480	586301	66694	105247	255667	84681.8	244936	46598.2
B0LT89|STK24_RAT;tr|H9KVF3|H9KVF3_RAT	2	1	58.71	0.0616508	0.999949	28.1549	47989.6	Serine/threonine-protein kinase 24 OS=Rattus norvegicus OX=10116 GN=Stk24 PE=2 SV=1	0	129.71	47.255	0	972.29	96.6903	167.19	67.6964	6812.23	189.669	27598.5	244.277
P62329|TYB4_RAT	3	3	121.69	0.0618452	0.999949	3.94629	5052.65	Thymosin beta-4 OS=Rattus norvegicus OX=10116 GN=Tmsb4x PE=1 SV=2	140127	234870	81580.1	560752	327395	1.63779e+06	284434	76808.8	107972	140767	55507.5	90286.1
Q5XID7|ARMX3_RAT;tr|A0A0G2KAU2|A0A0G2KAU2_RAT	1	1	34.49	0.0620958	0.999949	10.3278	42552.6	Armadillo repeat-containing X-linked protein 3 OS=Rattus norvegicus OX=10116 GN=Armcx3 PE=1 SV=1	0	835.182	101.412	0.489274	63.7357	107.421	218.278	44.6348	340.864	564.96	9577.78	699.137
P34926|MAP1A_RAT;tr|A0A0G2K5C6|A0A0G2K5C6_RAT;tr|G3V7U2|G3V7U2_RAT	40	34	1934.95	0.0624913	0.999949	1.9382	299529	Microtubule-associated protein 1A OS=Rattus norvegicus OX=10116 GN=Map1a PE=1 SV=1	405534	232739	977673	251213	265033	522708	252956	289873	347833	208456	130797	139864
P97633|KC1A_RAT;tr|A0JPL2|A0JPL2_RAT;tr|D3ZRE3|D3ZRE3_RAT	1	1	25.39	0.0631442	0.999949	1.07863	37495.2	Casein kinase I isoform alpha OS=Rattus norvegicus OX=10116 GN=Csnk1a1 PE=2 SV=1	0	1093.04	15905.6	7.12012	534.005	0	9077.68	1353.62	605.912	3520.04	2133.99	2227.67
P61265|STX1B_RAT	19	13	1046.47	0.0642364	0.999949	1.89965	33244.7	Syntaxin-1B OS=Rattus norvegicus OX=10116 GN=Stx1b PE=1 SV=1	1.88198e+06	561349	1.15921e+06	471062	489701	827215	417742	628389	463287	284214	729483	314515
Q569A6|ERD21_RAT;Q5U305|ERD22_RAT	2	2	93.11	0.0648518	0.999949	13.6522	24546.1	ER lumen protein-retaining receptor 1 OS=Rattus norvegicus OX=10116 GN=Kdelr1 PE=2 SV=1	32034.4	7328.17	108709	14316.5	47985.8	896880	7424.9	22609	2791.86	2558.68	19578.3	26141.7
P0C5H9|MANF_RAT;tr|B2RZ09|B2RZ09_RAT	11	10	585.68	0.0651275	0.999949	2.5656	20387.7	Mesencephalic astrocyte-derived neurotrophic factor OS=Rattus norvegicus OX=10116 GN=Manf PE=1 SV=1	145291	313356	127998	190557	78715.1	75539.9	186265	213490	928626	280828	120889	659650
tr|Q4KSH6|Q4KSH6_RAT	1	1	52.75	0.0658983	0.999949	46.0751	44113.6	Dual specificity mitogen-activated protein kinase kinase 4 OS=Rattus norvegicus OX=10116 GN=Map2k4 PE=2 SV=1	0	0	0	75.5504	1640.76	0	0	571.923	270.143	614.241	77082.3	540.687
Q5I0D1|GLOD4_RAT	4	4	166.59	0.0664442	0.999949	2.53256	33267.7	Glyoxalase domain-containing protein 4 OS=Rattus norvegicus OX=10116 GN=Glod4 PE=1 SV=1	4082.97	16181.6	95782.5	6939.67	17881.1	7242.65	20926.6	68361.7	130205	11112.6	100670	43823.9
tr|F1M3T8|F1M3T8_RAT	5	5	176.83	0.0668424	0.999949	1.86024	125056	Attractin-like 1 OS=Rattus norvegicus OX=10116 GN=Atrnl1 PE=4 SV=3	73.7655	22383.5	50734.1	119.134	9629.57	1026.38	23375.7	11509.9	13757.2	23210.4	54277.4	30067.5
P02680|FIBG_RAT	2	2	86.72	0.0676457	0.999949	9.12763	50632.8	Fibrinogen gamma chain OS=Rattus norvegicus OX=10116 GN=Fgg PE=1 SV=3	1776.48	6.35197	0	89.5194	833.171	6988.81	506.466	38071.4	24793.7	190.169	21916.3	3008.23
tr|B0BNL2|B0BNL2_RAT	2	2	53.05	0.068095	0.999949	1.71427	18332.4	Peptidyl-prolyl cis-trans isomerase OS=Rattus norvegicus OX=10116 GN=Pin1 PE=1 SV=1	26.2482	1931.81	15675.5	109.23	667.74	384.734	3649.27	2655.79	8491.75	1469.96	13862.7	2090.63
Q07936|ANXA2_RAT	9	6	436.33	0.0682497	0.999949	2.00992	38678.2	Annexin A2 OS=Rattus norvegicus OX=10116 GN=Anxa2 PE=1 SV=2	204710	106626	34675.5	70048.6	118822	241361	21485.9	20170.8	15400	231496	22649.1	75004.5
tr|A0A0G2JY03|A0A0G2JY03_RAT	2	1	92.96	0.0691054	0.999949	1.89994	28253.1	Alpha N-catenin OS=Rattus norvegicus OX=10116 PE=1 SV=1	48631.7	30161.9	99895.3	35402.4	30761.1	71854.2	23029.6	44181.2	39069	36751.9	7578.8	16082.1
P62078|TIM8B_RAT	3	3	113.06	0.0693441	0.999949	3.85845	9286.48	Mitochondrial import inner membrane translocase subunit Tim8 B OS=Rattus norvegicus OX=10116 GN=Timm8b PE=3 SV=1	39.4935	10100.6	2143.51	38.6964	8866.15	779.985	20091.5	6376.89	507.654	16221.8	17117.2	24449.2
tr|A0A096MJA9|A0A096MJA9_RAT;tr|A0A096MKE0|A0A096MKE0_RAT;tr|A0A0G2K2B5|A0A0G2K2B5_RAT	2	2	99.9	0.0706941	0.999949	5.32738	74890.4	Aspartate-beta-hydroxylase OS=Rattus norvegicus OX=10116 GN=Asph PE=1 SV=1	10120.7	59804.9	40059.8	9233.48	718.069	10601.9	62609.2	175324	260418	73642.5	119988	3448.13
tr|F1M1W4|F1M1W4_RAT	1	1	58.88	0.0714707	0.999949	4.14983	36282.3	Nedd4 family-interacting protein 2 OS=Rattus norvegicus OX=10116 GN=Ndfip2 PE=4 SV=2	780.162	1952.87	2914.71	761.868	33192.4	665.696	49269.4	3072.66	2163.28	26367.8	81859	4371.81
tr|A0A0G2JY26|A0A0G2JY26_RAT;tr|D4A0I5|D4A0I5_RAT	6	6	260.34	0.0714944	0.999949	2.06865	102188	DnaJ heat shock protein family (Hsp40) member C6 OS=Rattus norvegicus OX=10116 GN=Dnajc6 PE=1 SV=1	37217.8	63590.5	195969	73984.6	105834	12728.4	98070.7	204078	98336.6	96876.6	377588	137290
tr|B5DF39|B5DF39_RAT;tr|G3V9L7|G3V9L7_RAT	3	3	125.74	0.0716929	0.999949	2.02293	37977.3	Gdpd5 protein (Fragment) OS=Rattus norvegicus OX=10116 GN=Gdpd5 PE=2 SV=1	510110	809614	327826	474519	122259	466609	227205	219160	71147.7	699015	29855.4	93719.3
Q5BK81|PTGR2_RAT	3	3	135	0.0719009	0.999949	3.33292	38136.4	Prostaglandin reductase 2 OS=Rattus norvegicus OX=10116 GN=Ptgr2 PE=2 SV=2	9420.51	9886.81	17384.6	11327.5	32717	4963.4	5900.6	132439	39726	29774.6	54655.5	23135.2
P62828|RAN_RAT	5	1	207.43	0.0732813	0.999949	1.95498	24423.1	GTP-binding nuclear protein Ran OS=Rattus norvegicus OX=10116 GN=Ran PE=1 SV=3	527184	223249	277507	407379	765344	495757	267245	347682	39553.8	218287	36779.2	469709
tr|D3ZCG2|D3ZCG2_RAT;tr|D3ZJJ7|D3ZJJ7_RAT;tr|D3ZSN6|D3ZSN6_RAT;tr|D3ZYN2|D3ZYN2_RAT;tr|D4A1V5|D4A1V5_RAT;tr|D4ADI4|D4ADI4_RAT	4	3	111.97	0.0747915	0.999949	1.76393	185290	Kinesin family member 21A OS=Rattus norvegicus OX=10116 GN=Kif21a PE=1 SV=2	13110.9	18405.6	17287.9	21296.7	614.779	2112.52	8.61382	42.7278	74.9855	22027.3	18875.7	258.207
P31977|EZRI_RAT;tr|A0A0G2K890|A0A0G2K890_RAT	10	2	387.59	0.075569	0.999949	2.15965	69390.9	Ezrin OS=Rattus norvegicus OX=10116 GN=Ezr PE=1 SV=3	573416	285908	470390	508974	1.91399e+06	611165	135723	659464	669208	337629	79618.2	138980
Q5EB81|NB5R1_RAT;tr|G3V9S0|G3V9S0_RAT	5	5	177	0.0756924	0.999949	2.25524	34222.9	NADH-cytochrome b5 reductase 1 OS=Rattus norvegicus OX=10116 GN=Cyb5r1 PE=2 SV=1	148222	412091	356358	86871	119686	115458	273088	334209	1.22609e+06	546481	183764	229909
P31016|DLG4_RAT;tr|A0A0G2K7F5|A0A0G2K7F5_RAT	7	5	352.19	0.0757768	0.999949	5.86645	80465.4	Disks large homolog 4 OS=Rattus norvegicus OX=10116 GN=Dlg4 PE=1 SV=1	999682	72215	108275	326917	21765.5	59643.5	10851.3	113551	14758.8	30793.2	36199	64623.3
Q6AXT5|RAB21_RAT	1	1	58.53	0.0764911	0.999949	2.33598	24163.4	Ras-related protein Rab-21 OS=Rattus norvegicus OX=10116 GN=Rab21 PE=2 SV=1	101434	53776.7	162902	102999	325879	212668	101859	5198.25	4128.53	47911.8	98102.1	153616
tr|Q642B0|Q642B0_RAT	1	1	58.92	0.0789685	0.999949	2.89953	62562.2	Glypican 4 OS=Rattus norvegicus OX=10116 GN=Gpc4 PE=1 SV=1	2523.9	883.506	2811.01	8293.62	7872.22	6247.63	58.3865	172.414	0	1640.74	5702.22	2300.92
Q3KRD8|IF6_RAT;tr|A0A0G2K110|A0A0G2K110_RAT	1	1	32.68	0.0793349	0.999949	7.81932	26571.1	Eukaryotic translation initiation factor 6 OS=Rattus norvegicus OX=10116 GN=Eif6 PE=1 SV=1	7647.72	3247.82	3830.62	1875.43	5802.56	282.201	2301.22	22253.1	22420.5	1879.06	114977	13560.7
tr|G3V852|G3V852_RAT	29	16	1161.36	0.0814783	0.999949	2.31724	269670	RCG55135, isoform CRA_b OS=Rattus norvegicus OX=10116 GN=Tln1 PE=1 SV=1	127588	373555	315936	227561	111115	416435	41044.1	169755	169672	258031	2291.82	37680.3
tr|D3ZGY1|D3ZGY1_RAT	1	1	33.57	0.0818295	0.999949	13.4323	22726.6	PYM homolog 1, exon junction complex-associated factor OS=Rattus norvegicus OX=10116 GN=Pym1 PE=1 SV=1	355.198	427.72	1197.1	33.1489	0	109.329	360.557	411.187	5848.38	131.175	20498.2	1260.63
tr|G3V7Z4|G3V7Z4_RAT	7	6	237.22	0.0831529	0.999949	3.51771	44049.3	Glia-derived nexin OS=Rattus norvegicus OX=10116 GN=Serpine2 PE=3 SV=1	12273.9	6542.94	8810.13	10594.2	7128.65	15849.4	41367.5	6100.33	59798.8	9488.47	84573.5	13952.2
Q68FR6|EF1G_RAT	12	9	454.33	0.0833791	0.999949	1.90199	50060.8	Elongation factor 1-gamma OS=Rattus norvegicus OX=10116 GN=Eef1g PE=2 SV=3	527718	134845	684006	461289	329727	508943	225119	337700	624942	123781	46134.1	33778.8
P30349|LKHA4_RAT	6	5	187.17	0.0837915	0.999949	4.87311	69089.1	Leukotriene A-4 hydrolase OS=Rattus norvegicus OX=10116 GN=Lta4h PE=1 SV=3	161.352	2174.58	16469.1	61.3634	299.026	404.457	5898.33	1861.29	633.424	1337.37	64919.1	20716.5
Q9JHL3|ECEL1_RAT;tr|D4AD32|D4AD32_RAT	1	1	30.93	0.0846155	0.999949	29.4416	87944.4	Endothelin-converting enzyme-like 1 OS=Rattus norvegicus OX=10116 GN=Ecel1 PE=2 SV=1	73.6582	51.7098	70.1103	12.6825	183.501	114.173	382.169	178.626	45.8604	167.229	13890.9	227.809
Q63688|CP7B1_RAT;tr|A0A0G2K4N5|A0A0G2K4N5_RAT;tr|G3V787|G3V787_RAT	3	3	77.34	0.0850239	0.999949	2.33195	48227	25-hydroxycholesterol 7-alpha-hydroxylase (Fragment) OS=Rattus norvegicus OX=10116 GN=Cyp7b1 PE=1 SV=1	237.109	9853.98	17625.7	1732.41	8475.9	352.837	17902.4	2498.85	25744.9	7715.77	19881.2	15519.2
tr|A0A140UHX4|A0A140UHX4_RAT	1	1	39.86	0.0862982	0.999949	159.732	62984.3	Protein kinase AMP-activated non-catalytic subunit gamma 2 OS=Rattus norvegicus OX=10116 GN=Prkag2 PE=1 SV=1	0	14.3669	0	11.8817	0	0	119.113	82.9417	79.5928	0	3911.09	0
Q62969|PTGIS_RAT;tr|A0A0G2K776|A0A0G2K776_RAT;tr|F1LP67|F1LP67_RAT	1	1	23.24	0.086449	0.999949	12.6585	57128.1	Prostacyclin synthase OS=Rattus norvegicus OX=10116 GN=Ptgis PE=2 SV=1	1.112	1047.85	379.682	1.93602	229.813	4.90982	336.973	158.45	29.8972	1182.15	18508.1	864.567
Q6P6V0|G6PI_RAT	35	31	1922.45	0.0865216	0.999949	2.05036	62827.1	Glucose-6-phosphate isomerase OS=Rattus norvegicus OX=10116 GN=Gpi PE=1 SV=1	1.26991e+06	595383	1.04406e+06	489644	1.97615e+06	2.10102e+06	283890	1.47507e+06	934163	571003	61999.7	320142
Q4KLN7|ARFG3_RAT;tr|A0A0G2K4J0|A0A0G2K4J0_RAT	1	1	44.91	0.0869409	0.999949	8.12326	57670.9	ADP-ribosylation factor GTPase-activating protein 3 OS=Rattus norvegicus OX=10116 GN=Arfgap3 PE=1 SV=1	3652.2	525.301	1219.88	1668.81	2252.45	2461.18	690.544	36627.2	22643.4	2194.27	31029.6	2505.43
Q91Z79|LIPA3_RAT;tr|F1LSE6|F1LSE6_RAT	7	7	247.91	0.0874313	0.999949	2.88119	133429	Liprin-alpha-3 OS=Rattus norvegicus OX=10116 GN=Ppfia3 PE=1 SV=2	53520.7	10357	17426.6	38015	51458.3	144272	24045.2	17645.4	20785.3	10583.2	27574	8714.21
tr|A0A0G2K5K1|A0A0G2K5K1_RAT	3	3	99	0.0878966	0.999949	1.76119	102518	Anoctamin OS=Rattus norvegicus OX=10116 GN=Ano8 PE=1 SV=1	2108.58	15478.7	33440.4	2139.91	31645.3	36485.9	30344	24521.8	48193	35924.4	28225.8	46420.8
P04177|TY3H_RAT	2	2	55.35	0.0880444	0.999949	2.51395	55966.1	Tyrosine 3-monooxygenase OS=Rattus norvegicus OX=10116 GN=Th PE=1 SV=3	35356.9	6564.01	14484	27427.4	5938.76	52841.6	15221	26771.5	2489.27	7772.02	3186.43	1288.41
tr|D3ZUZ9|D3ZUZ9_RAT;tr|D4A5R0|D4A5R0_RAT	1	1	30.03	0.0881228	0.999949	2.0925	18611.4	Peptidyl-prolyl cis-trans isomerase OS=Rattus norvegicus OX=10116 GN=Ppih PE=1 SV=2	30.1632	3134.23	7745.25	27.2323	16285.1	107.289	11888	1215.81	3046.67	8038.84	5636.74	27360.4
O08816|WASL_RAT;tr|F1LSG0|F1LSG0_RAT	1	1	22.13	0.088228	0.999949	98.338	54325.3	Neural Wiskott-Aldrich syndrome protein OS=Rattus norvegicus OX=10116 GN=Wasl PE=1 SV=2	103.157	58.5411	359.01	2.9234	76.1513	22.3493	197.415	188.774	2376.83	88.7676	58281.9	45.5149
Q5PPH0|ENOPH_RAT	2	2	84.75	0.0883747	0.999949	1.78689	28874.7	Enolase-phosphatase E1 OS=Rattus norvegicus OX=10116 GN=Enoph1 PE=2 SV=1	9800.29	11715.8	48885.4	13118.6	21881.9	6753.35	5811.11	542.437	3022.98	3810.94	45107.3	4470.88
Q925N6|IGSF1_RAT	6	4	323.53	0.0900046	0.999949	2.26929	147293	Immunoglobulin superfamily member 1 OS=Rattus norvegicus OX=10116 GN=Igsf1 PE=1 SV=1	4064.48	12010.7	10860.6	28312.8	52491.2	178409	2957.75	1909.7	1731.27	3688.43	2473.17	113336
tr|Q4QQS6|Q4QQS6_RAT	2	2	75.45	0.0900208	0.999949	1.76853	36856.9	Dolichyl-phosphate beta-glucosyltransferase OS=Rattus norvegicus OX=10116 GN=Alg5 PE=1 SV=1	346777	57573.2	74994.5	77939.8	39170.8	80254.8	16650.9	18155.5	3013.96	35799.2	289661	19360
Q5U211|SNX3_RAT;tr|B0BMY2|B0BMY2_RAT	5	4	148.71	0.0914515	0.999949	2.21073	18762.3	Sorting nexin-3 OS=Rattus norvegicus OX=10116 GN=Snx3 PE=1 SV=1	39259.3	69945	68217.3	2001.47	83456.1	4940.84	74924.7	48433.9	111684	45426.8	222547	89061.6
Q9WVJ6|TGM2_RAT;tr|A0A0B5AGL6|A0A0B5AGL6_RAT	1	1	40.44	0.0915277	0.999949	3.81606	76934.8	Protein-glutamine gamma-glutamyltransferase 2 OS=Rattus norvegicus OX=10116 GN=Tgm2 PE=1 SV=1	0.270794	143.493	5024.31	35.5085	3.35469	0	1359.03	29.9168	85.5828	55.3138	11037.8	7302.34
tr|Q5PQU1|Q5PQU1_RAT	1	1	30.47	0.0919166	0.999949	17.1058	47764.3	Kininogen 1 OS=Rattus norvegicus OX=10116 GN=Kng2 PE=2 SV=1	41.7528	352.974	15.9407	0	0	0	111.182	3.63664	544.805	20.1179	6301.31	43.7348
tr|D4ACG7|D4ACG7_RAT;tr|H1UBM5|H1UBM5_RAT	21	14	1004.56	0.0933243	0.999949	1.59451	61748.9	Copine 6 OS=Rattus norvegicus OX=10116 GN=Cpne6 PE=1 SV=2	685965	462334	553827	808743	236496	793422	451005	353202	581070	306467	206649	322224
P11497|ACACA_RAT;tr|A0A0G2K5G8|A0A0G2K5G8_RAT;tr|D3ZRA3|D3ZRA3_RAT	2	2	52.31	0.0934381	0.999949	14.4039	265191	Acetyl-CoA carboxylase 1 OS=Rattus norvegicus OX=10116 GN=Acaca PE=1 SV=1	99.7971	623.355	1212.22	17.8087	282.711	456.657	885.723	4661.55	276.194	256.966	31740.6	962.185
P63249|IPKA_RAT	1	1	21.69	0.0938761	0.999949	121.582	7960.47	cAMP-dependent protein kinase inhibitor alpha OS=Rattus norvegicus OX=10116 GN=Pkia PE=1 SV=2	21.2109	794.336	933.986	13.1086	0.502825	37.1186	2146.29	58.3038	65.7307	898.576	215356	354.2
D3ZWZ9|GP107_RAT	1	1	32.51	0.0944729	0.999949	1.68268	62002	Protein GPR107 OS=Rattus norvegicus OX=10116 GN=Gpr107 PE=1 SV=1	507.903	634.179	5.05709	5663.68	13918.8	4040.39	0	0	0	756.058	20.3844	13944.1
tr|F7EQ81|F7EQ81_RAT;tr|Q32KJ5|Q32KJ5_RAT;tr|Q5M918|Q5M918_RAT	2	2	68.94	0.094507	0.999949	2.81437	55414.1	N-acetylglucosamine-6-sulfatase OS=Rattus norvegicus OX=10116 GN=Gns PE=1 SV=1	14506.1	37932.4	7000.45	1478.97	16910.3	3198.18	73777.2	22984.5	4267.79	27605.2	72556.9	26847.2
Q5XIG8|STRAP_RAT	5	5	215.6	0.094611	0.999949	2.68516	38456.3	Serine-threonine kinase receptor-associated protein OS=Rattus norvegicus OX=10116 GN=Strap PE=1 SV=1	5269.4	10828	10756.6	2855.29	23432.4	1705.17	39821.1	5416.65	12293.8	11096.4	63837	14807.7
Q5HZV9|PP1R7_RAT	5	3	224.79	0.095472	0.999949	3.71577	41297	Protein phosphatase 1 regulatory subunit 7 OS=Rattus norvegicus OX=10116 GN=Ppp1r7 PE=1 SV=1	186560	44295.4	99508.7	63282.5	50911.3	701748	33124	31723.3	67601.5	31828.2	55535.6	88685.1
P80299|HYES_RAT;tr|Q5RKK3|Q5RKK3_RAT	3	2	96.56	0.0955065	0.999949	1.26882	62340.5	Bifunctional epoxide hydrolase 2 OS=Rattus norvegicus OX=10116 GN=Ephx2 PE=1 SV=1	11.0187	112.857	12885.1	388.158	35179.6	51.9445	7417.87	1166.49	5492.7	3228.87	8456.71	35938.2
Q5RJM1|PORED_RAT	3	2	76.59	0.0956957	0.999949	1.9045	38092.2	Polyprenol reductase OS=Rattus norvegicus OX=10116 GN=Srd5a3 PE=1 SV=2	73928.4	3518.09	996.631	97843.5	463.944	2400.74	37845.5	75855.9	127826	16402.3	77921.6	5342.65
P29314|RS9_RAT;tr|A0A0G2K4C4|A0A0G2K4C4_RAT;tr|M0RB65|M0RB65_RAT	1	1	28.42	0.0968602	0.999949	2.12658	22591.4	40S ribosomal protein S9 OS=Rattus norvegicus OX=10116 GN=Rps9 PE=1 SV=4	1.39776	8847.86	9434.94	85.1806	5748.66	106.637	16264.1	2655.31	1941.42	6331.86	10237.1	14085.9
tr|G3V8D0|G3V8D0_RAT;tr|P97877|P97877_RAT	2	2	74.7	0.0970704	0.999949	2.91119	43901.8	ST8 alpha-N-acetyl-neuraminide alpha-2,8-sialyltransferase 3 OS=Rattus norvegicus OX=10116 GN=St8sia3 PE=1 SV=1	7459.81	30244.8	27974.8	1884.05	337.806	1356.41	22167.4	58909.1	67876.8	31097.4	19598	1973.83
tr|D3ZF03|D3ZF03_RAT	3	3	76.58	0.0971253	0.999949	4.88587	66645	Apoptosis-inducing factor, mitochondria-associated 3 OS=Rattus norvegicus OX=10116 GN=Aifm3 PE=1 SV=1	1244.56	2186.05	1799.51	1853.73	31909.2	805.106	16544.3	1928.31	4282.14	8682.79	153845	9166.17
B0BN86|TMM11_RAT;tr|A0A0G2JUS7|A0A0G2JUS7_RAT	1	1	52.85	0.097308	0.999949	58.1328	21341.6	Transmembrane protein 11, mitochondrial OS=Rattus norvegicus OX=10116 GN=Tmem11 PE=2 SV=1	0	0	713.788	2112.2	0	212.575	0	21390.7	133104	168.464	14092.2	7885.05
Q9QYP0|MEGF8_RAT;tr|R9PXW3|R9PXW3_RAT	1	1	46.62	0.0975801	0.999949	44.3139	297554	Multiple epidermal growth factor-like domains protein 8 OS=Rattus norvegicus OX=10116 GN=Megf8 PE=1 SV=2	64.3147	44.4339	170.863	0	813.289	0.00618523	117.539	343.617	29.7907	186.115	47241.9	512.013
Q6AY55|DCAKD_RAT	5	5	207.77	0.09794	0.999949	2.20666	27352.1	Dephospho-CoA kinase domain-containing protein OS=Rattus norvegicus OX=10116 GN=Dcakd PE=2 SV=1	182636	208278	131446	130407	12170.1	105436	145329	212288	686782	172354	331201	151999
tr|G3V7Q6|G3V7Q6_RAT	3	3	191.73	0.0983854	0.999949	2.73767	28559.4	Proteasome subunit beta OS=Rattus norvegicus OX=10116 GN=Psmb5 PE=1 SV=1	510501	33962.4	539567	367790	624874	666874	120863	77771.7	241626	44151	12556.7	505188
tr|A0A0G2JT78|A0A0G2JT78_RAT	10	2	403.73	0.0987072	0.999949	1.66396	23461.7	RAB6B, member RAS oncogene family OS=Rattus norvegicus OX=10116 GN=Rab6b PE=4 SV=1	1.47477e+06	655344	926462	724721	2.35208e+06	1.44686e+06	975147	441497	681837	629177	434386	1.39349e+06
Q6P6S4|SIL1_RAT	2	2	80.57	0.099551	0.999949	69.7281	52349.8	Nucleotide exchange factor SIL1 OS=Rattus norvegicus OX=10116 GN=Sil1 PE=2 SV=1	274.865	20.9723	275.47	191.522	17.0961	50.495	163.445	313.139	25693.9	18.6195	31185.3	529.241
tr|B1WBN0|B1WBN0_RAT	1	1	40.05	0.100567	0.999949	1.4464	28938	Monocyte to macrophage differentiation-associated 2 OS=Rattus norvegicus OX=10116 GN=Mmd2 PE=2 SV=1	16476.4	7401.18	13136	14688.7	19668.9	166773	64597	46398.5	104742	22337.2	73760.4	32617.3
tr|A0A096MJT6|A0A096MJT6_RAT	4	4	176.83	0.102534	0.999949	2.09219	554495	Similar to RIKEN cDNA D630029K19 OS=Rattus norvegicus OX=10116 GN=RGD1307100 PE=1 SV=1	70.9708	845.668	1482.87	90.9254	5143.44	122.173	1730.65	281.827	2534.5	1378.53	5983.5	4318.14
tr|A0A0G2KA11|A0A0G2KA11_RAT	4	4	95.5	0.102643	0.999949	2.0636	181735	Phosphatidylinositol-3,4,5-trisphosphate-dependent Rac exchange factor 2 OS=Rattus norvegicus OX=10116 GN=Prex2 PE=1 SV=1	66347.2	120406	30122	62937.8	84754.6	240702	56386.6	47308.2	44112.4	68717.9	28986.7	47795.3
P02454|CO1A1_RAT	9	8	428.46	0.103337	0.999949	20.3715	137954	Collagen alpha-1(I) chain OS=Rattus norvegicus OX=10116 GN=Col1a1 PE=1 SV=5	265295	166443	104762	8.91494e+06	316011	40099.1	87495.9	44170.6	66500.7	69102.4	33175.4	180991
Q6AYD3|PA2G4_RAT	4	4	154.16	0.104702	0.999949	1.4172	43656.8	Proliferation-associated protein 2G4 OS=Rattus norvegicus OX=10116 GN=Pa2g4 PE=1 SV=1	76388.8	70941.3	103925	140223	114051	144752	89014.5	47086.2	93797.3	63293.6	38606.5	127051
tr|A0A0G2K1Q9|A0A0G2K1Q9_RAT;tr|A3E0T0|A3E0T0_RAT;tr|Q9JMB3|Q9JMB3_RAT	13	1	591.55	0.105182	0.999949	2.1617	102692	Erythrocyte membrane protein band 4.1-like 3 OS=Rattus norvegicus OX=10116 GN=Epb41l3 PE=1 SV=1	82984.5	27315	30658.6	19065.4	71427.8	145185	14947.8	18798.7	17998.4	31320.5	5279.55	85887
tr|G3V874|G3V874_RAT	13	1	572.69	0.105182	0.999949	2.1617	107088	Erythrocyte membrane protein band 4.1-like 3 OS=Rattus norvegicus OX=10116 GN=Epb41l3 PE=1 SV=1	64817.1	21335.1	23946.7	14891.5	55790.4	113400	11675.3	14683.2	14058	24463.6	4123.72	67084.1
P47709|RP3A_RAT;tr|F1LPB9|F1LPB9_RAT	9	7	445.22	0.10559	0.999949	1.75298	75832.4	Rabphilin-3A OS=Rattus norvegicus OX=10116 GN=Rph3a PE=1 SV=1	46215.6	18582.1	35712.8	73279.5	163975	123946	7779.13	7181.73	82568	8227.18	151227	6403.97
tr|F1LY09|F1LY09_RAT	3	1	112.64	0.105955	0.999949	2.07294	35833.2	Actin-related protein 3B OS=Rattus norvegicus OX=10116 GN=Actr3b PE=3 SV=2	100602	59217.7	69587.3	16965.6	55931.3	18290.7	57759.7	13831.1	8833.13	28870.4	12267.7	33094.7
tr|B2GV35|B2GV35_RAT	5	5	184.57	0.107045	0.999949	9.01426	37072.8	Galactosylgalactosylxylosylprotein 3-beta-glucuronosyltransferase OS=Rattus norvegicus OX=10116 GN=B3gat3 PE=1 SV=1	13217.5	19463.4	23507.5	317703	192448	777125	21779.2	23313.6	18596.5	27427	47403	10518.3
P97521|MCAT_RAT;tr|Q66HP8|Q66HP8_RAT	10	7	546.43	0.107195	0.999949	2.10035	33154	Mitochondrial carnitine/acylcarnitine carrier protein OS=Rattus norvegicus OX=10116 GN=Slc25a20 PE=1 SV=1	232968	145324	64850	43674.9	281583	253379	91112.8	52569.3	73110.1	217502	22688.2	29499.1
P18422|PSA3_RAT;tr|Q6IE67|Q6IE67_RAT	5	5	251.99	0.109056	0.999949	1.74456	28419.2	Proteasome subunit alpha type-3 OS=Rattus norvegicus OX=10116 GN=Psma3 PE=1 SV=3	538513	232028	252388	471225	568951	504236	280986	382711	417514	330098	26133.5	34183.3
tr|D3ZL50|D3ZL50_RAT	2	2	71.37	0.109903	0.999949	24.9457	174292	Tetratricopeptide repeat domain 37 OS=Rattus norvegicus OX=10116 GN=Ttc37 PE=1 SV=3	358.193	27.6812	0	220.251	2.56912	2.21146	1044.71	2.4084	20.8662	2534.89	11425	211.577
A1L1J9|LMF2_RAT	4	4	165.82	0.110066	0.999949	1.89124	80253.7	Lipase maturation factor 2 OS=Rattus norvegicus OX=10116 GN=Lmf2 PE=2 SV=1	255195	403560	419681	182398	261156	20216.4	278970	487956	694240	371187	277039	807288
Q62720|ZNT1_RAT	3	3	115.28	0.110255	0.999949	1.9029	55142.6	Zinc transporter 1 OS=Rattus norvegicus OX=10116 GN=Slc30a1 PE=2 SV=1	74937.2	104121	44709.9	12736.4	15853.6	4182.45	102435	86599.8	19329	129101	92916.8	57791.6
tr|A0A0G2K6N2|A0A0G2K6N2_RAT;tr|D3ZN99|D3ZN99_RAT	1	1	30.67	0.110306	0.999949	1.95476	166321	Adhesion G protein-coupled receptor B2 OS=Rattus norvegicus OX=10116 GN=Adgrb2 PE=1 SV=1	0	8459.59	14568.9	0	10946.7	0	17867	375.07	532.643	7121.86	19989.7	20527
tr|Q498D8|Q498D8_RAT	2	2	121.75	0.11058	0.999949	2.41481	12273.9	Ring-box 1 OS=Rattus norvegicus OX=10116 GN=Rbx1 PE=1 SV=1	28036.9	10612.9	5497.16	98219.3	68021.6	8365.68	5420.23	1346.73	852.258	2554.86	16327.5	64086.9
Q5I0G4|GARS_RAT	7	6	290.43	0.11123	0.999949	1.82883	81792.7	Glycine--tRNA ligase OS=Rattus norvegicus OX=10116 GN=Gars1 PE=1 SV=2	208517	249680	114649	559004	429918	195792	102860	183416	228931	257379	46845	141600
Q6AYH5|DCTN2_RAT;tr|A0A0G2JUC7|A0A0G2JUC7_RAT	11	11	466.8	0.111822	0.999949	1.91027	44147.9	Dynactin subunit 2 OS=Rattus norvegicus OX=10116 GN=Dctn2 PE=1 SV=1	380176	119032	276337	73401.8	188373	266553	122193	151419	125314	167394	90461	25779.5
tr|D3Z9K4|D3Z9K4_RAT	2	1	96.34	0.112419	0.999949	42.4822	54007.4	Pleckstrin homology domain-containing O2 OS=Rattus norvegicus OX=10116 GN=Plekho2 PE=1 SV=2	7.55733	2.81589	51.3276	26.9398	259.262	0.633304	9.35099	1041	4.2996	115.488	12978.1	658.32
tr|F1MAA5|F1MAA5_RAT;tr|Q66H32|Q66H32_RAT	1	1	42.18	0.113267	0.999949	3.7695	63142.7	RAN GTPase-activating protein 1 OS=Rattus norvegicus OX=10116 GN=Rangap1 PE=1 SV=2	1.49749	403.698	7279.5	2.68831	2823.69	20.6714	3624.59	796.174	193.824	653.513	1461.34	32970
P62718|RL18A_RAT	2	1	117.12	0.114263	0.999949	1.82065	20732.3	60S ribosomal protein L18a OS=Rattus norvegicus OX=10116 GN=Rpl18a PE=2 SV=1	274540	434287	170704	168756	254443	68716	496124	267786	745083	449965	407153	130816
tr|Q5RK08|Q5RK08_RAT	4	4	177.71	0.114566	0.999949	1.731	32941.7	Glioblastoma amplified sequence OS=Rattus norvegicus OX=10116 GN=Nipsnap2 PE=1 SV=1	10198.8	30953.5	50171	15765.1	6815.11	117262	39855.2	35155.8	113833	30389.2	121944	58970.3
Q5BJU5|CNIH2_RAT	1	1	47.25	0.114671	0.999949	4.32385	18931.4	Protein cornichon homolog 2 OS=Rattus norvegicus OX=10116 GN=Cnih2 PE=1 SV=1	456422	102922	50637.3	35949.4	13163.4	19179.7	21105.5	16256.6	8393.99	88557.2	11960.4	10594.4
tr|D3ZHG0|D3ZHG0_RAT	1	1	51.61	0.116322	0.999949	1.73462	28351.3	Very-long-chain (3R)-3-hydroxyacyl-CoA dehydratase OS=Rattus norvegicus OX=10116 GN=Hacd2 PE=1 SV=3	342940	277109	254628	529214	94640.5	286086	346011	607963	1.05618e+06	389883	223020	472565
Q5XI31|PIGS_RAT	13	11	628.23	0.116851	0.999949	3.95599	61724.4	GPI transamidase component PIG-S OS=Rattus norvegicus OX=10116 GN=Pigs PE=2 SV=3	105568	375837	208203	5870.39	21479.5	50788.2	325474	449968	1.71646e+06	429738	80103.2	35445
Q9EQG6|KDIS_RAT;tr|A0A0H4SMZ8|A0A0H4SMZ8_RAT;tr|A0A0H4SN51|A0A0H4SN51_RAT;tr|A0A0H4SQ65|A0A0H4SQ65_RAT;tr|A0A0H4SRI2|A0A0H4SRI2_RAT;tr|A0A0H4SRI7|A0A0H4SRI7_RAT;tr|A0A0H4T4D0|A0A0H4T4D0_RAT;tr|D3ZWB2|D3ZWB2_RAT;tr|D4ABK9|D4ABK9_RAT	4	4	152.04	0.117454	0.999949	2.39871	195715	Kinase D-interacting substrate of 220 kDa OS=Rattus norvegicus OX=10116 GN=Kidins220 PE=1 SV=2	304.332	1169.8	2355.44	6762.15	166.461	592.63	1273.65	5071.59	1757	820.444	7322.04	10982.6
Q9WVE9|ITSN1_RAT	3	3	84.4	0.119968	0.999949	163.23	194196	Intersectin-1 OS=Rattus norvegicus OX=10116 GN=Itsn1 PE=1 SV=2	23.5036	8.07824	42.2576	23.4317	38.5176	9.01301	65.4516	2870.94	82.0691	2.18716	20536.8	78.44
Q6JP77|AKA7G_RAT;tr|A0A0A0MXX1|A0A0A0MXX1_RAT	2	2	82.22	0.120463	0.999949	1.77728	39417.8	A-kinase anchor protein 7 isoforms delta and gamma OS=Rattus norvegicus OX=10116 GN=Akap7 PE=1 SV=1	728531	331642	145402	188960	445160	351975	351266	243617	89723.6	234220	106793	207542
tr|A0A0G2K6F1|A0A0G2K6F1_RAT;tr|F1M9Y7|F1M9Y7_RAT	2	2	65.65	0.120593	0.999949	21.6341	56222.8	T-complex 11-like 1 OS=Rattus norvegicus OX=10116 GN=Tcp11l1 PE=1 SV=1	1300.19	105.816	749.68	0	0	0	3304	213.278	14078.8	873.927	28166.2	0
Q5I0E7|TMED9_RAT	11	6	518.41	0.121784	0.999949	1.68149	27028.1	Transmembrane emp24 domain-containing protein 9 OS=Rattus norvegicus OX=10116 GN=Tmed9 PE=1 SV=1	938734	652353	645790	1.36726e+06	1.14975e+06	2.2119e+06	522471	1.2963e+06	533725	726400	148477	915246
P00564|KCRM_RAT;tr|A0A0G2JSP8|A0A0G2JSP8_RAT	6	1	241.97	0.122135	0.999949	2.34844	43045	Creatine kinase M-type OS=Rattus norvegicus OX=10116 GN=Ckm PE=1 SV=2	63071.5	39829.1	10283.5	10494.4	6656.41	46655.4	2897.36	9696.27	13577.5	40328.5	1924.61	6940.81
tr|D3ZG78|D3ZG78_RAT	1	1	48.02	0.122152	0.999949	1.35211	332375	Zinc finger ZZ-type and EF-hand domain-containing 1 OS=Rattus norvegicus OX=10116 GN=Zzef1 PE=1 SV=2	38987.8	13750	36932.5	43079.2	23598	5091.98	1181.63	0	0	51404.7	13849.9	52961.5
Q5PPN5|TPPP3_RAT	1	1	30.96	0.122564	0.999949	1.28767	18979.5	Tubulin polymerization-promoting protein family member 3 OS=Rattus norvegicus OX=10116 GN=Tppp3 PE=2 SV=1	0	6884.46	19046.9	0	65406.5	0	16891	2128.42	5486.22	6533.95	1239.06	38653.7
tr|F1LNP8|F1LNP8_RAT	3	2	104.96	0.123425	0.999949	6.66853	57156.3	Nectin cell adhesion molecule 1 OS=Rattus norvegicus OX=10116 GN=Nectin1 PE=1 SV=2	38.0778	2594.71	12286.6	34.5756	14613.3	563.14	10789.9	3218.58	1055.88	2172.65	165988	17700.4
P00388|NCPR_RAT	3	2	117.35	0.123464	0.999949	1.78561	76962.9	NADPH--cytochrome P450 reductase OS=Rattus norvegicus OX=10116 GN=Por PE=1 SV=3	0	3451.08	24390.8	0	49535.2	0	12040.4	4028.36	838.091	3287.2	7142.06	15997.7
Q62688|PLCL1_RAT;tr|A0A0G2K4N6|A0A0G2K4N6_RAT;tr|F1LP62|F1LP62_RAT	3	3	83.57	0.123793	0.999949	4.96584	122772	Inactive phospholipase C-like protein 1 OS=Rattus norvegicus OX=10116 GN=Plcl1 PE=1 SV=1	1700.35	3029.45	1185.1	1437.06	1105.32	132.652	1159.26	4637.19	1062.59	4270.42	29925.7	1601.12
P62775|MTPN_RAT	2	2	139.17	0.125078	0.999949	1.79086	12860.8	Myotrophin OS=Rattus norvegicus OX=10116 GN=Mtpn PE=1 SV=2	676636	317990	419038	208736	950495	842869	222372	292374	77726.3	185359	511531	617973
P25093|FAAA_RAT;tr|F1M6W1|F1M6W1_RAT	1	1	35.65	0.125285	0.999949	4.66381	45975.6	Fumarylacetoacetase OS=Rattus norvegicus OX=10116 GN=Fah PE=1 SV=1	5661.94	8166.3	2435.54	2563.97	4603.24	3357.54	4324.19	71052.5	2977.6	15308.5	27957.2	3316.53
tr|D4A416|D4A416_RAT	4	4	211.87	0.125545	0.999949	3.86645	62290.5	CLPTM1-like OS=Rattus norvegicus OX=10116 GN=Clptm1l PE=1 SV=1	106979	148922	80967.8	75591.7	83154.8	1.13644e+06	66384.5	111548	87302.4	119696	33379.2	3797.74
tr|D3ZYS1|D3ZYS1_RAT	1	1	24.15	0.126212	0.999949	7.19903	39834.8	Purine-rich element-binding protein G OS=Rattus norvegicus OX=10116 GN=Purg PE=1 SV=1	1630.13	716.098	8364.89	202.72	390.471	193.874	1103.57	3490.66	16523.8	484.443	60026.7	1146.67
tr|D3ZQC6|D3ZQC6_RAT;tr|D5MTG9|D5MTG9_RAT	1	1	32.99	0.127075	0.999949	1.09381	150898	E3 ubiquitin-protein ligase OS=Rattus norvegicus OX=10116 GN=Ubr1 PE=1 SV=3	13.5459	51.1746	30920.2	51.6719	0	179.899	734.102	144.968	567.382	1139.52	30908.2	650.743
P24090|FETUA_RAT;tr|F1LM19|F1LM19_RAT	4	3	222.07	0.127346	0.999949	2.93756	37982.3	Alpha-2-HS-glycoprotein OS=Rattus norvegicus OX=10116 GN=Ahsg PE=1 SV=2	51708.3	7962.4	76032.6	100825	207817	58372.2	17461.8	20070.9	15406.8	32210.7	54103.7	31880.4
Q60587|ECHB_RAT;tr|A0A0G2K330|A0A0G2K330_RAT	6	5	303	0.127648	0.999949	1.78619	51414.5	Trifunctional enzyme subunit beta, mitochondrial OS=Rattus norvegicus OX=10116 GN=Hadhb PE=1 SV=1	135689	110308	47453.6	49305.2	106269	242482	56791.5	59678.3	33679.2	150091	32183.4	54718.9
Q9WTV5|PSMD9_RAT;tr|G3V9P0|G3V9P0_RAT	2	1	62.33	0.127823	0.999949	20.8673	24829.1	26S proteasome non-ATPase regulatory subunit 9 OS=Rattus norvegicus OX=10116 GN=Psmd9 PE=1 SV=1	102.626	901.923	986.907	51.2057	184.691	1255.75	2362.19	1128.52	109.902	4021.14	64600.1	461.043
tr|D3ZTG3|D3ZTG3_RAT	2	2	58.54	0.128082	0.999949	1.51082	84821.5	Family with sequence similarity 171, member B OS=Rattus norvegicus OX=10116 GN=Fam171b PE=1 SV=2	1413	7871.32	24969.2	4208.65	34237.1	2386.49	22569	11468.6	16022	8020.82	30617.1	24743.8
tr|B5DFL0|B5DFL0_RAT	3	2	74.57	0.128882	0.999949	5.04206	53362.8	Snta1 protein OS=Rattus norvegicus OX=10116 GN=Snta1 PE=1 SV=1	274.3	3644.32	7571.3	98.4886	3597.53	503.735	7070.51	2940	3792.38	3704.6	60882.9	717.89
tr|D4A644|D4A644_RAT	5	5	178.42	0.128994	0.999949	2.60661	90418.7	MAP7 domain-containing 1 OS=Rattus norvegicus OX=10116 GN=Map7d1 PE=1 SV=1	1781.44	1390.6	3709.18	9347.28	9877.61	23372.4	6068.04	437.285	373.282	1393.09	9203.78	1506.41
tr|F1M6V8|F1M6V8_RAT	2	1	51.18	0.129445	0.999949	16.1842	81436.9	Striatin 4 OS=Rattus norvegicus OX=10116 GN=Strn4 PE=1 SV=1	2.05213	0.192586	82.2758	10.9989	43.8795	10.668	16.1778	7.1741	17.5776	56.6565	2166.8	164.32
tr|D3ZEI4|D3ZEI4_RAT	9	8	455.97	0.130288	0.999949	2.27143	46529	Hepatic and glial cell adhesion molecule OS=Rattus norvegicus OX=10116 GN=Hepacam PE=1 SV=2	117433	146605	248398	119606	669905	646961	13475.8	217009	245376	137289	233261	11598.6
P28841|NEC2_RAT	3	3	126.15	0.131665	0.999949	1.41466	70753.4	Neuroendocrine convertase 2 OS=Rattus norvegicus OX=10116 GN=Pcsk2 PE=1 SV=1	55044.1	100644	50262.4	38229.3	33898.5	16936.1	50078	93810.9	98446.1	57986	68593.2	48431.3
P11530|DMD_RAT;tr|A0A0F7CRZ7|A0A0F7CRZ7_RAT;tr|F5CC78|F5CC78_RAT;tr|Q7TPH2|Q7TPH2_RAT;tr|Q7TPH3|Q7TPH3_RAT;tr|Q7TPH4|Q7TPH4_RAT	3	3	119.16	0.132528	0.999949	4.23682	425830	Dystrophin OS=Rattus norvegicus OX=10116 GN=Dmd PE=1 SV=2	5521.48	12613.6	7243.51	135683	71048.7	42734.1	5735.52	3498	15681.8	9836.23	9276.11	20842.8
tr|D4AE63|D4AE63_RAT	3	3	91.13	0.133022	0.999949	10.9146	81342.6	Myogenesis-regulating glycosidase OS=Rattus norvegicus OX=10116 GN=Myorg PE=1 SV=1	2667.22	3490.99	7662.32	1938.9	2046.71	2367.82	5460.44	6399.95	4747.66	2850.95	195814	4917.72
P47196|AKT1_RAT	1	1	30.69	0.133592	0.999949	1.35583	55735.5	RAC-alpha serine/threonine-protein kinase OS=Rattus norvegicus OX=10116 GN=Akt1 PE=1 SV=1	6438.14	4790.11	10211.4	14399.9	8113.7	2521.93	0	0	54111.5	4985.45	976.334	2939.17
tr|B2GV65|B2GV65_RAT	3	3	140.55	0.133746	0.999949	1.76492	11430.3	HIG1 domain family, member 2A OS=Rattus norvegicus OX=10116 GN=Higd2a PE=2 SV=1	7941.83	29266.9	15653	6923.64	16705.7	24903.2	5553.12	7618.91	15678.1	25582.4	383.667	2633.49
E9PSK7|JIP3_RAT	2	1	59.04	0.134324	0.999949	30.958	145649	C-Jun-amino-terminal kinase-interacting protein 3 OS=Rattus norvegicus OX=10116 GN=Mapk8ip3 PE=1 SV=2	927.711	166.651	114.612	1055.65	220.48	1612.75	208.984	56123.6	38117.5	295.545	31855.6	259.831
Q9JHW0|PSB7_RAT;tr|A0A0G2JUN8|A0A0G2JUN8_RAT	3	3	99.41	0.134573	0.999949	56.0559	29927.5	Proteasome subunit beta type-7 OS=Rattus norvegicus OX=10116 GN=Psmb7 PE=1 SV=1	682.021	46.501	969.997	292.297	394.726	436.548	1419.11	32.5384	45863.9	962.728	108180	1736.9
tr|B0BNG6|B0BNG6_RAT;tr|F1LQ22|F1LQ22_RAT	2	1	72.72	0.134689	0.999949	9.51874	29925.8	USE1-like protein (Fragment) OS=Rattus norvegicus OX=10116 GN=Use1 PE=2 SV=1	5948.96	3542.65	12906.1	37822.4	2367.9	10968.3	2038.47	301022	94459.2	3910.37	244112	54621.8
tr|D3ZF19|D3ZF19_RAT	2	1	100.38	0.134939	0.999949	17.4514	37796.1	Transmembrane protein 68 OS=Rattus norvegicus OX=10116 GN=Tmem68 PE=4 SV=1	186.47	0	81.6936	6861.74	0	0	105.284	456.306	0	5054.89	94845.8	23964.3
tr|B2RYB8|B2RYB8_RAT	5	5	219.67	0.135384	0.999949	11.3891	84817.9	Integrin beta OS=Rattus norvegicus OX=10116 GN=Itgb2 PE=1 SV=1	83232.4	73032.9	33245.3	3.33822e+06	177992	123174	68984.6	44315.8	20969.4	57633.9	78754.7	65532.9
Q9WUH4|FHL1_RAT;tr|Q6P792|Q6P792_RAT	3	3	138.38	0.135515	0.999949	3.8364	31903.7	Four and a half LIM domains protein 1 OS=Rattus norvegicus OX=10116 GN=Fhl1 PE=2 SV=1	22.8058	7628.45	29122.1	408.642	2189.76	7815.76	16185.5	9860.72	2001.29	11695.4	133445	7842.8
P04166|CYB5B_RAT	6	6	266.37	0.136015	0.999949	1.61654	16264.9	Cytochrome b5 type B OS=Rattus norvegicus OX=10116 GN=Cyb5b PE=1 SV=2	229587	285986	214575	131668	340892	542635	89885.5	290839	46037	236901	20259	395758
Q9JJL4|RHOQ_RAT	3	1	176.75	0.136419	0.999949	2.48058	22645.4	Rho-related GTP-binding protein RhoQ OS=Rattus norvegicus OX=10116 GN=Rhoq PE=2 SV=1	18054.7	12234.5	15663.1	2578.21	36400.3	35575.4	13568.1	4892.18	5140.75	16421.6	662.467	7894.68
Q8CFN2|CDC42_RAT	21	2	1091.29	0.136419	0.999949	2.48058	21258.6	Cell division control protein 42 homolog OS=Rattus norvegicus OX=10116 GN=Cdc42 PE=1 SV=2	1.0913e+06	739505	946743	155838	2.20019e+06	2.15033e+06	820116	295704	310729	992590	40042.3	477189
P00763|TRY2_RAT;tr|D4A7D9|D4A7D9_RAT;tr|Q6IE66|Q6IE66_RAT;tr|W4VSR6|W4VSR6_RAT;tr|W4VSR7|W4VSR7_RAT	1	1	20.05	0.137121	0.999949	6.99893	26227.8	Anionic trypsin-2 OS=Rattus norvegicus OX=10116 GN=Prss2 PE=1 SV=2	112444	6694.52	9866.19	365206	383.371	89958.5	145.882	0	62044.7	13760.3	6715	854.468
Q1JU68|EIF3A_RAT	1	1	32.07	0.137207	0.999949	79.8347	163196	Eukaryotic translation initiation factor 3 subunit A OS=Rattus norvegicus OX=10116 GN=Eif3a PE=2 SV=2	11.9739	44.3043	255.095	7.01656	224.224	33.5869	487.555	62.5191	47.3871	29.421	44537.1	836.911
Q64542|AT2B4_RAT	38	15	1899.29	0.137451	0.999949	1.33975	133094	Plasma membrane calcium-transporting ATPase 4 OS=Rattus norvegicus OX=10116 GN=Atp2b4 PE=1 SV=1	1.88675e+06	1.90831e+06	1.12918e+06	1.59802e+06	1.38593e+06	1.25499e+06	1.47994e+06	1.2215e+06	1.63276e+06	1.42936e+06	600343	475554
P27682|7B2_RAT;tr|G3V714|G3V714_RAT	6	4	314.98	0.137585	0.999949	1.96781	23683.7	Neuroendocrine protein 7B2 OS=Rattus norvegicus OX=10116 GN=Scg5 PE=1 SV=1	82481.1	66866.3	6950.06	13853.1	327516	82289.9	14436.4	2579.3	13909.8	10255	252483	1057.16
P58366|ANKH_RAT;tr|F1LN34|F1LN34_RAT	6	5	261.97	0.137831	0.999949	1.67409	54265	Progressive ankylosis protein homolog OS=Rattus norvegicus OX=10116 GN=Ankh PE=2 SV=1	336552	290278	267378	548800	295559	934967	223987	525157	374245	293370	51646	128598
tr|A0A0H2UH92|A0A0H2UH92_RAT	2	1	56.42	0.138113	0.999949	2.19664	136526	DNA replication ATP-dependent helicase/nuclease OS=Rattus norvegicus OX=10116 GN=Slc25a16 PE=1 SV=1	32.72	842.615	3254.74	0	142.351	3.04864	800.375	489.318	81.6067	770.647	7035.53	214.22
tr|D3Z865|D3Z865_RAT	4	4	181.2	0.138571	0.999949	4.42365	26547.6	Mannose-P-dolichol utilization defect 1 protein OS=Rattus norvegicus OX=10116 GN=Mpdu1 PE=1 SV=1	23656.2	84084.5	82156	141.368	25078.7	37696.1	21899.3	113636	714828	157472	53676.1	56844.5
P36201|CRIP2_RAT	3	3	134.43	0.139383	0.999949	6.2258	22696	Cysteine-rich protein 2 OS=Rattus norvegicus OX=10116 GN=Crip2 PE=2 SV=1	3608.87	624.607	907.815	5826.88	7992.13	681.487	948.049	14976.9	24038.8	2164.39	76962.1	3195.67
tr|A0A0G2K719|A0A0G2K719_RAT;tr|A0A0G2K9N3|A0A0G2K9N3_RAT;tr|D3ZN21|D3ZN21_RAT;tr|W8BZ34|W8BZ34_RAT	5	5	145.67	0.140051	0.999949	2.9074	73145.6	RNA helicase OS=Rattus norvegicus OX=10116 GN=Ddx3x PE=1 SV=1	1957.36	9418.1	7142.6	20637.4	1034.18	1003.12	3719.16	4547.61	73017.9	7453.85	20017.8	11007.7
Q6MG08|ABCF1_RAT	2	1	55.27	0.140208	0.999949	2.43404	95251.9	ATP-binding cassette sub-family F member 1 OS=Rattus norvegicus OX=10116 GN=Abcf1 PE=1 SV=1	261.542	143.991	47.3622	252.684	257.028	249.516	297.255	349.829	468.074	269.213	1458.02	107.966
tr|F1LS42|F1LS42_RAT	31	1	1701.98	0.140216	0.999949	2.23086	76714.9	Protein kinase C OS=Rattus norvegicus OX=10116 GN=Prkcb PE=1 SV=2	55245.3	4660.54	24535	1445.46	3781.99	5284.26	15037.4	7341	0	19677	0	507.821
Q6P9X4|TP4A2_RAT;Q78EG7|TP4A1_RAT;tr|D3ZZP6|D3ZZP6_RAT	1	1	24.63	0.141129	0.999949	54.3175	19127.2	Protein tyrosine phosphatase type IVA 2 OS=Rattus norvegicus OX=10116 GN=Ptp4a2 PE=2 SV=1	25.6564	0	404.978	0	0	18.9492	19.4383	344.128	1291.68	23.3776	22741.6	0
tr|F1M392|F1M392_RAT	1	1	22.72	0.141503	0.999949	1.68889	121500	LIM and calponin homology domains 1 OS=Rattus norvegicus OX=10116 GN=Limch1 PE=1 SV=2	41087.7	3930.13	16267.9	24365.8	77056.9	47997.1	3748.89	3787.29	1531.88	1211.57	60266.8	54213.7
tr|A0A0G2JSM8|A0A0G2JSM8_RAT	20	2	1011.29	0.14154	0.999949	2.64729	21310.6	Cell division control protein 42 homolog OS=Rattus norvegicus OX=10116 GN=Cdc42 PE=1 SV=1	1.26662e+06	1.18052e+06	1.05187e+06	704970	6.42419e+06	5.18655e+06	866540	1.14492e+06	1.29003e+06	1.07394e+06	222692	1.37582e+06
P23385|GRM1_RAT;tr|G3V7U1|G3V7U1_RAT	8	4	284.36	0.142004	0.999949	2.66541	133236	Metabotropic glutamate receptor 1 OS=Rattus norvegicus OX=10116 GN=Grm1 PE=1 SV=1	2160.45	35373	92857.8	3956.12	23389.6	12827.4	82550.8	22792.6	9386.19	26975.2	95637.6	217282
tr|D4A9G5|D4A9G5_RAT	2	2	68.08	0.142079	0.999949	4.56442	83096.8	Dpy-19-like C-mannosyltransferase 3 OS=Rattus norvegicus OX=10116 GN=Dpy19l3 PE=1 SV=2	4601.45	2785.77	5564.76	181.132	2080.59	552.439	5772.1	3700.74	663.419	5346.71	49323.8	7156.52
P62628|DLRB1_RAT	2	1	71.22	0.142373	0.999949	47.1808	10989.7	Dynein light chain roadblock-type 1 OS=Rattus norvegicus OX=10116 GN=Dynlrb1 PE=1 SV=3	1246.19	794.719	211.84	987.807	389.273	792.185	446.157	2358.33	2407.93	1214.64	201426	781.742
Q6AYK3|INO1_RAT	5	4	157.43	0.142863	0.999949	1.77419	60883.6	Inositol-3-phosphate synthase 1 OS=Rattus norvegicus OX=10116 GN=Isyna1 PE=3 SV=2	1088.69	6292.57	38889.2	8612.78	3699.29	16285.5	23050.5	13961.3	14334.7	8063.58	58501.8	14918.6
tr|D3ZMY7|D3ZMY7_RAT	1	1	41.12	0.143558	0.999949	23.0053	67761.2	5'-nucleotidase, cytosolic II OS=Rattus norvegicus OX=10116 GN=Nt5c2 PE=1 SV=3	868.56	400.006	178.73	681.305	909.751	25.177	418.655	10732.5	201.099	347.601	57343.5	1434.06
tr|D4A0Z0|D4A0Z0_RAT	1	1	28.01	0.143652	0.999949	14.4086	21238.9	Phosphatidylinositol glycan anchor biosynthesis, class H OS=Rattus norvegicus OX=10116 GN=Pigh PE=3 SV=1	75.5735	2.04739	0	0.0923902	23.7836	0.0936056	0.101213	4.34663	19.0744	34.9039	1138.76	266.594
P97586|CGRE1_RAT;tr|A0A0A0MXV3|A0A0A0MXV3_RAT	3	3	143.52	0.143812	0.999949	12.2408	30834.5	Cell growth regulator with EF hand domain protein 1 OS=Rattus norvegicus OX=10116 GN=Cgref1 PE=1 SV=1	17.2071	753.632	1195.77	63.2717	64.6305	1657.51	395.633	520.861	617.526	134.421	27166.6	17092.6
tr|F1M6P8|F1M6P8_RAT	5	4	182.22	0.144397	0.999949	2.69349	53777	EGF-like repeats and discoidin domains 3 OS=Rattus norvegicus OX=10116 GN=Edil3 PE=4 SV=3	93177	36666.9	91235.8	271514	396661	611125	54951.5	54751.9	277084	33294.7	1107.74	135851
tr|D3Z9L0|D3Z9L0_RAT	8	7	308.45	0.144859	0.999949	1.41613	54259	Acylglycerol kinase OS=Rattus norvegicus OX=10116 GN=Agk PE=1 SV=2	90355	222038	62346.8	55180.1	17172.6	120838	134396	137347	111535	171304	168332	81349.9
tr|A0A0G2K4Y1|A0A0G2K4Y1_RAT;tr|A0A0G2K5E4|A0A0G2K5E4_RAT;tr|A1KXF7|A1KXF7_RAT;tr|G3V6I5|G3V6I5_RAT;tr|Q2TVU3|Q2TVU3_RAT;tr|Q2UZS7|Q2UZS7_RAT	2	1	56.07	0.144912	0.999949	1.74852	49416.1	DnaJ heat shock protein family (Hsp40) member A3 OS=Rattus norvegicus OX=10116 GN=Dnaja3 PE=1 SV=1	12.4138	15233.5	18427.6	23.4968	3674.95	1933.24	32474.5	6976.55	1842.93	14110.7	5110.02	8211.16
Q5HZA6|PPCEL_RAT;tr|A0A0G2JX67|A0A0G2JX67_RAT;tr|D3ZZ32|D3ZZ32_RAT	1	1	41.65	0.145502	0.999949	2.00444	83481.6	Prolyl endopeptidase-like OS=Rattus norvegicus OX=10116 GN=Prepl PE=1 SV=2	1285.35	5123.28	1520.64	33750.4	55029.2	9068.83	2041.55	0	0	5316.08	2703	42711
Q5HZE8|TM59L_RAT;tr|A0A0G2KB04|A0A0G2KB04_RAT;tr|A0A0H2UHT4|A0A0H2UHT4_RAT	1	1	22.56	0.1463	0.999949	1.4274	36976.5	Transmembrane protein 59-like OS=Rattus norvegicus OX=10116 GN=Tmem59l PE=2 SV=2	384.21	6894.94	42124.6	961.236	110.994	1270.86	11513.2	2272.97	4494.41	4416.59	45481	5685.38
tr|D4A6R4|D4A6R4_RAT	1	1	34.65	0.146408	0.999949	9186.73	30458.4	Hypothetical protein LOC100362216 OS=Rattus norvegicus OX=10116 GN=LOC100362216 PE=1 SV=1	0	0	0	0.231705	7.18439	0	54.4436	66.777	0	0	68008.5	0
B2DD29|BRSK1_RAT	3	3	112.27	0.147339	0.999949	6.90664	85182.8	Serine/threonine-protein kinase BRSK1 OS=Rattus norvegicus OX=10116 GN=Brsk1 PE=1 SV=1	2687.08	2453.26	2229.16	635.712	293.955	1237.04	441.782	47815.5	7961.24	2141.36	1816.08	5687.25
tr|A0A0G2K490|A0A0G2K490_RAT;tr|D3ZZQ0|D3ZZQ0_RAT	5	4	179.87	0.147648	0.999949	1.60643	154971	TRAF2 and NCK-interacting kinase OS=Rattus norvegicus OX=10116 GN=Tnik PE=1 SV=1	1.24764	1800.44	26847.9	21.3583	14615.7	10.7566	7853.33	2931.12	205.563	2440.8	18020	38103.3
P14056|ARAF_RAT	1	1	56.1	0.147824	0.999949	58.5337	67551.5	Serine/threonine-protein kinase A-Raf OS=Rattus norvegicus OX=10116 GN=Araf PE=1 SV=1	1.08059	19.1814	13.4086	4.59497	176.345	0	168.482	0	170.375	102.151	12097.8	23.1822
tr|D4A742|D4A742_RAT	1	1	58.83	0.14822	0.999949	1.56779	8182.82	Protein MGR2 homolog OS=Rattus norvegicus OX=10116 GN=Romo1 PE=1 SV=1	71611	107497	1175.48	1906.3	4288.85	9679.41	65561.4	18950.5	95673.9	63354.7	57875.7	6118.97
tr|A0A0G2JUX5|A0A0G2JUX5_RAT	5	3	258.01	0.148701	0.999949	3.71358	33532.1	Transcriptional activator protein Pur-beta OS=Rattus norvegicus OX=10116 GN=Purb PE=1 SV=1	8714.03	11289.4	83160.4	18670.7	53937.4	38320.5	68687.5	198525	19352.5	10727.5	207812	289944
O08700|VPS45_RAT	1	1	33.61	0.149028	0.999949	2.51429	64893.7	Vacuolar protein sorting-associated protein 45 OS=Rattus norvegicus OX=10116 GN=Vps45 PE=1 SV=1	13.211	2090.16	6830.26	55.7026	3533.11	166.066	5706.28	678.004	348.399	2949.42	15091.6	7128.94
tr|D3ZT16|D3ZT16_RAT	1	1	35.66	0.149307	0.999949	2.10079	20412.8	MAP6 domain-containing 1 OS=Rattus norvegicus OX=10116 GN=Map6d1 PE=1 SV=1	88.4782	1352.17	22024.8	2.30487	41.8276	7.45939	1491.15	296.165	276.155	217.936	38517.4	8605.55
Q64611|CSAD_RAT;tr|B3VPA7|B3VPA7_RAT;tr|Q9R1F5|Q9R1F5_RAT	2	1	50.47	0.149328	0.999949	60.9479	55248.7	Cysteine sulfinic acid decarboxylase OS=Rattus norvegicus OX=10116 GN=Csad PE=1 SV=1	14.4767	23.7986	207.114	1.79753	2.07042	0.175045	94.6124	3.14892	6.43535	35.2628	14820.3	242.669
O08623|SQSTM_RAT	2	2	96.47	0.149568	0.999949	4.06885	47681.3	Sequestosome-1 OS=Rattus norvegicus OX=10116 GN=Sqstm1 PE=1 SV=1	59.0496	0.311552	40.3105	27.3477	3488.68	12.599	834.027	85.5341	15.9845	65.1365	7799.01	5963.29
P26819|ARBK2_RAT;tr|A0A0G2JZ82|A0A0G2JZ82_RAT;tr|A0A0G2K145|A0A0G2K145_RAT;tr|A0A0G2K9S3|A0A0G2K9S3_RAT	1	1	37.94	0.149984	0.999949	153.968	79887.2	Beta-adrenergic receptor kinase 2 OS=Rattus norvegicus OX=10116 GN=Grk3 PE=1 SV=1	0	0	0	0	24.9137	0	0	30.4015	34.8117	1.39304	3769.3	0
tr|D3Z967|D3Z967_RAT	1	1	36.48	0.150633	0.999949	287.67	31564.2	Tetraspanin OS=Rattus norvegicus OX=10116 GN=Tspan33 PE=3 SV=1	36.5549	0	4.45733	4.86535	0.0281779	0	99.4812	0.234999	46.933	39.427	13019.6	0
Q6AY56|TBA8_RAT	78	1	4564.88	0.151563	0.999949	1.11602	50037.5	Tubulin alpha-8 chain OS=Rattus norvegicus OX=10116 GN=Tuba8 PE=2 SV=1	6.21662	3968.35	16595.9	18.1587	5831.03	388.025	9018.88	1897.11	5312.38	3423.15	2016.19	8250.22
Q5U316|RAB35_RAT	6	4	269.9	0.151639	0.999949	2.52478	23025.2	Ras-related protein Rab-35 OS=Rattus norvegicus OX=10116 GN=Rab35 PE=1 SV=1	44354.2	61884.8	124937	348654	30750.8	51229.7	44323.9	45894	31398.4	44689	26461.2	69359.5
P18163|ACSL1_RAT	7	7	252.27	0.151865	0.999949	5.67468	78178.7	Long-chain-fatty-acid--CoA ligase 1 OS=Rattus norvegicus OX=10116 GN=Acsl1 PE=1 SV=1	26885.7	62419.3	18617	11882.1	15909.3	42241.4	40324.1	50498.1	789244	44778.7	71204.4	13787
tr|B1H2A2|B1H2A2_RAT	1	1	48.67	0.151926	0.999949	3.80001	55627.3	Fibronectin type 3 and SPRY domain-containing protein OS=Rattus norvegicus OX=10116 GN=Fsd1 PE=1 SV=1	16951.3	1981.16	2642.37	5491.89	13298.4	0	0	0	874.284	9303.41	0	444.682
Q02589|ADPRH_RAT	1	1	28.09	0.152584	0.999949	1.62309	39961.1	[Protein ADP-ribosylarginine] hydrolase OS=Rattus norvegicus OX=10116 GN=Adprh PE=1 SV=2	13.9908	10451.9	49107	16.3623	1078.49	36.952	13400	725.827	1762.43	4797.64	7019.95	9694.72
Q62844|FYN_RAT	7	1	244.02	0.152772	0.999949	1.75697	60701.9	Tyrosine-protein kinase Fyn OS=Rattus norvegicus OX=10116 GN=Fyn PE=1 SV=1	165240	13723.2	18617.8	23715.5	26029.9	5762.37	21731.9	142447	42386.6	105950	112081	20071.6
tr|A0A0G2JT45|A0A0G2JT45_RAT;tr|Q5XIJ7|Q5XIJ7_RAT	2	1	52.13	0.152813	0.999949	22.1488	35203.1	Calcium-binding protein 39-like OS=Rattus norvegicus OX=10116 GN=Cab39l PE=1 SV=1	476.071	17.9375	38.4023	112.873	429.075	501.273	460.552	3344.91	59.4178	138.91	30364.8	529.702
P24051|RS27L_RAT;Q71TY3|RS27_RAT;tr|M0RA26|M0RA26_RAT	1	1	30.2	0.153589	0.999949	2.87674	9477.16	40S ribosomal protein S27-like OS=Rattus norvegicus OX=10116 GN=Rps27l PE=1 SV=3	46.622	31640.1	13304.9	44.2503	12271	3234.94	115845	7748.39	7956.02	31642.2	7065.64	3905.72
P25304|AGRIN_RAT;tr|D4A2F1|D4A2F1_RAT;tr|F1LPF2|F1LPF2_RAT	4	3	143.31	0.154228	0.999949	1.51798	208644	Agrin OS=Rattus norvegicus OX=10116 GN=Agrn PE=1 SV=2	7.46692	690.08	2640.89	3.59283	2334.66	19.5057	1601.22	258.524	482.053	376.15	1003.15	4925.62
tr|Q5XFX3|Q5XFX3_RAT	11	2	535.92	0.15502	0.999949	1.63245	49253.8	Phospholipid-transporting ATPase (Fragment) OS=Rattus norvegicus OX=10116 GN=Atp9b PE=2 SV=1	165109	257188	165614	198315	44358.6	83141	181639	322669	495245	222863	137512	131687
Q0ZCA7|CLC2L_RAT;tr|A0A0H2UI15|A0A0H2UI15_RAT;tr|B1WBM7|B1WBM7_RAT	4	4	166.25	0.156051	0.999949	5.29016	23623	C-type lectin domain family 2 member L OS=Rattus norvegicus OX=10116 GN=Clec2l PE=1 SV=2	55.2173	3922.77	11135	6652.88	70057.3	686.473	6309.36	2612.49	134873	2991.88	266414	76190.5
Q5U1Z0|RBGPR_RAT;tr|D4ABP4|D4ABP4_RAT;tr|F1LMT8|F1LMT8_RAT	3	3	111.95	0.156119	0.999949	1.52168	154430	Rab3 GTPase-activating protein non-catalytic subunit OS=Rattus norvegicus OX=10116 GN=Rab3gap2 PE=1 SV=2	86.4641	2066.04	10507.9	63.6336	9678.52	379.273	7734.45	1693.36	1474.53	1995.13	11763	10006.1
Q6NX65|PDC10_RAT	1	1	30.29	0.156435	0.999949	80.1518	24355.2	Programmed cell death protein 10 OS=Rattus norvegicus OX=10116 GN=Pdcd10 PE=2 SV=1	675.095	350.715	653.673	180.432	2211.31	52.9391	1183.4	516.652	824.036	313.647	324980	2741.53
P10760|SAHH_RAT	11	10	411.4	0.156562	0.999949	2.43219	47538.1	Adenosylhomocysteinase OS=Rattus norvegicus OX=10116 GN=Ahcy PE=1 SV=3	51006.3	163502	370551	12351.4	16420.2	8446.98	377448	443960	435790	200705	32889.4	22704.5
tr|D3ZBU7|D3ZBU7_RAT	1	1	45.39	0.157278	0.999949	9.27787	123213	DUF4592 domain-containing protein OS=Rattus norvegicus OX=10116 GN=RGD1310819 PE=1 SV=3	0	189.591	719.1	0	1996.96	0	1425.86	649.057	0.250092	513.173	21980.3	2389.6
tr|F1MA70|F1MA70_RAT	1	1	37.92	0.15728	0.999949	20.1018	136463	Cation-transporting ATPase OS=Rattus norvegicus OX=10116 GN=Atp13a5 PE=3 SV=2	0	283.19	96.5049	33.2414	1467.35	26.0736	157.807	74.6717	76.5785	402.498	36760.4	849.459
P0C588|CNNM4_RAT	1	1	34.26	0.157411	0.999949	1.81589	86692.2	Metal transporter CNNM4 OS=Rattus norvegicus OX=10116 GN=Cnnm4 PE=1 SV=1	3699.61	14977.2	15374	3044.63	38298.2	3831.91	1282.81	31534.5	188.385	7064.29	3559.19	0
tr|A0A0G2K6E8|A0A0G2K6E8_RAT;tr|E9PSJ4|E9PSJ4_RAT	4	3	163.14	0.157553	0.999949	1.73793	149585	Sperm-associated antigen 9 OS=Rattus norvegicus OX=10116 GN=Spag9 PE=1 SV=1	105.257	2490.88	10838.1	37.9302	3229.9	44.9355	5888.45	720.992	680.917	2098.52	14268.5	5447.8
tr|D4A6C5|D4A6C5_RAT	4	3	149.78	0.157587	0.999949	1.7325	50622.9	Rho GTPase-activating protein 1 OS=Rattus norvegicus OX=10116 GN=Arhgap1 PE=1 SV=1	125927	80564.7	127286	280581	154723	435528	73819.5	103010	202044	104336	84141.5	127950
tr|A0A292G0W2|A0A292G0W2_RAT	8	8	443.23	0.157736	0.999949	1.64869	44828.3	Gai-interacting protein OS=Rattus norvegicus OX=10116 GN=Phf24 PE=4 SV=1	98636.8	46844.2	144266	39012	40167.2	13493.6	62451.4	78321.2	147398	57330.5	221514	63477.6
tr|A0A0G2K9T1|A0A0G2K9T1_RAT;tr|Q5YB86|Q5YB86_RAT	4	1	106.63	0.157739	0.999949	2.61524	100831	E3 ubiquitin-protein ligase OS=Rattus norvegicus OX=10116 GN=Itch PE=1 SV=1	207.347	3151.46	11584.3	38.7774	7052.05	65.2818	7023.23	309.544	3479.27	2345.01	22763.4	21874.1
tr|F1M3W5|F1M3W5_RAT	25	21	988.1	0.157955	0.999949	3.91006	341294	Dmx-like 2 OS=Rattus norvegicus OX=10116 GN=Dmxl2 PE=1 SV=3	124387	155300	2.15924e+06	403526	636899	75886.7	202483	155659	306458	124831	57147.3	62676.7
P30009|MARCS_RAT	25	24	1738.49	0.158198	0.999949	1.52566	29794.5	Myristoylated alanine-rich C-kinase substrate OS=Rattus norvegicus OX=10116 GN=Marcks PE=1 SV=2	1.55305e+06	899665	1.60135e+06	133836	2.27472e+06	47003.4	1.03101e+06	1.66367e+06	2.11917e+06	1.28689e+06	2.73013e+06	1.10062e+06
tr|D4A4P3|D4A4P3_RAT;tr|M0RA24|M0RA24_RAT	3	3	99.54	0.158542	0.999949	1.65864	11266.8	Complex I-B12 OS=Rattus norvegicus OX=10116 GN=Ndufb3 PE=1 SV=1	117227	240036	8871.3	30090.6	7220.52	113725	168603	172165	77829.9	274520	130315	34368.6
tr|D3ZBB3|D3ZBB3_RAT	2	2	52.94	0.158564	0.999949	45.242	19968.6	Similar to transmembrane 4 superfamily member 10 (Predicted) OS=Rattus norvegicus OX=10116 GN=Tmem47 PE=1 SV=1	1325.5	10.8168	450.018	264.617	218.529	130.273	121.596	332.12	463.141	186.923	78636.4	28829.6
tr|D3ZUV3|D3ZUV3_RAT	3	3	71.42	0.159009	0.999949	3.71378	65348.5	Eukaryotic translation initiation factor 2A OS=Rattus norvegicus OX=10116 GN=Eif2a PE=1 SV=3	27.8566	756.31	5779.8	84.2733	40.7879	139.834	3392.61	154.017	121.904	724.624	18691.1	2276.63
Q63356|MYO1E_RAT;tr|D4A7X9|D4A7X9_RAT	1	1	49.8	0.159292	0.999949	3.46775	126827	Unconventional myosin-Ie OS=Rattus norvegicus OX=10116 GN=Myo1e PE=1 SV=1	0	0	571.508	0	0	0	109.781	0	0	46.2499	1742.82	82.9902
P61589|RHOA_RAT	17	8	814.75	0.159453	0.999949	1.4757	21782.1	Transforming protein RhoA OS=Rattus norvegicus OX=10116 GN=Rhoa PE=1 SV=1	1.5054e+06	1.05213e+06	1.10609e+06	709942	909487	2.06188e+06	1.22258e+06	648191	1.8303e+06	1.04223e+06	97630.2	136320
tr|B2GUZ3|B2GUZ3_RAT	4	3	153.42	0.159616	0.999949	1.63066	105842	Formyltetrahydrofolate synthetase OS=Rattus norvegicus OX=10116 GN=Mthfd1l PE=1 SV=1	33248.1	61673.5	28152.8	4604.77	3684.46	312.129	34484.8	31573.8	70263.9	49263.7	9655.84	19476
tr|F1LLW8|F1LLW8_RAT;tr|Q32KJ4|Q32KJ4_RAT	2	1	65.81	0.159916	0.999949	2.80063	59255.2	Iduronate 2-sulfatase OS=Rattus norvegicus OX=10116 GN=Ids PE=3 SV=3	1782.16	8.01214	9314.48	210.107	90.6132	75.5944	31.5841	0	0	0	423.993	3643.85
P35355|PGH2_RAT;tr|Q63124|Q63124_RAT	6	5	179.36	0.160165	0.999949	2.13327	69164.3	Prostaglandin G/H synthase 2 OS=Rattus norvegicus OX=10116 GN=Ptgs2 PE=1 SV=1	1349.99	5817.5	7714.18	5603.13	966.633	31.8411	3024.79	7019.19	20986.6	2911.35	8436.54	3451.1
P24054|SPRL1_RAT;tr|G3V7X5|G3V7X5_RAT;tr|Q6P7A8|Q6P7A8_RAT	10	9	509.26	0.160808	0.999949	1.8191	70633.8	SPARC-like protein 1 OS=Rattus norvegicus OX=10116 GN=Sparcl1 PE=1 SV=1	124387	158167	189855	116172	166215	29620	176956	316877	529797	181032	97919.2	124352
tr|G3V7L6|G3V7L6_RAT	10	6	315.36	0.16089	0.999949	1.85051	48633.9	26S proteasome AAA-ATPase subunit RPT1 OS=Rattus norvegicus OX=10116 GN=Psmc2 PE=1 SV=1	149538	37877.1	77227.7	245479	105276	259990	58829.4	80718.6	190628	33024.7	34873.1	74979.7
tr|B2RYQ2|B2RYQ2_RAT	6	3	194.28	0.161388	0.999949	1.43441	36617.1	Serine/threonine-protein phosphatase 2A activator OS=Rattus norvegicus OX=10116 GN=Ptpa PE=1 SV=1	119710	104617	130009	101823	84017.6	227771	111253	132751	151818	73362.7	40940.3	25251.3
Q568Z9|PHYIP_RAT	5	3	185.26	0.161981	0.999949	1.8641	37554.6	Phytanoyl-CoA hydroxylase-interacting protein OS=Rattus norvegicus OX=10116 GN=Phyhip PE=2 SV=1	1.02501e+06	416270	610786	790612	861625	2.66034e+06	499670	568301	1.19628e+06	494544	68292.1	587231
Q6P7P5|BZW1_RAT	4	3	140.15	0.163343	0.999949	2.81637	48043.3	Basic leucine zipper and W2 domain-containing protein 1 OS=Rattus norvegicus OX=10116 GN=Bzw1 PE=1 SV=1	5093.32	1792.55	18875.5	11121.2	7754.43	107909	3156.69	743.205	216.704	869.463	31447.2	17730.9
tr|Q4QQV4|Q4QQV4_RAT	5	4	183.36	0.164641	0.999949	7.11294	57360.3	Histidine--tRNA ligase, cytoplasmic OS=Rattus norvegicus OX=10116 GN=Hars PE=1 SV=1	942.667	2048.31	14312.3	762.377	4340.45	799.887	3973.8	468.331	55836.7	2962.71	90175.2	11646.1
Q8VI04|ASGL1_RAT	11	8	540.55	0.16479	0.999949	2.01864	34410.4	Isoaspartyl peptidase/L-asparaginase OS=Rattus norvegicus OX=10116 GN=Asrgl1 PE=1 SV=1	468689	143109	341922	411680	1.12717e+06	1.04252e+06	287486	429157	270085	208090	47834.6	508578
P11662|NU2M_RAT;tr|A0A0A1G491|A0A0A1G491_RAT;tr|D2E6P4|D2E6P4_RAT;tr|Q06Q97|Q06Q97_RAT;tr|Q06QB0|Q06QB0_RAT;tr|Q5UAJ8|Q5UAJ8_RAT;tr|Q8HID0|Q8HID0_RAT;tr|Q8SEZ7|Q8SEZ7_RAT	2	2	109.05	0.16493	0.999949	5.36896	38652.6	NADH-ubiquinone oxidoreductase chain 2 OS=Rattus norvegicus OX=10116 GN=Mtnd2 PE=3 SV=3	1104.78	33805.8	8373.97	525.988	5369.58	2089.76	41665.3	52188	91120.4	87558.2	2033.45	700.909
tr|D3ZC56|D3ZC56_RAT	1	1	44.94	0.165112	0.999949	131.859	847223	Dystonin OS=Rattus norvegicus OX=10116 GN=Dst PE=1 SV=3	0	8.61063	0	0	96.2591	0	72.2438	438.642	0	9.6265	13307.5	0
P0C5W1|MAP1S_RAT;tr|A0A0H2UHQ3|A0A0H2UHQ3_RAT;tr|B5DFH2|B5DFH2_RAT	2	1	54.29	0.165169	0.999949	1.8431	102806	Microtubule-associated protein 1S OS=Rattus norvegicus OX=10116 GN=Map1s PE=1 SV=1	35346.7	11376.7	34482.9	337.664	138.757	200.858	39310.7	40202.5	645.396	21142.3	13782.6	35835.9
tr|Q4G079|Q4G079_RAT	3	3	166.49	0.165197	0.999949	2.19563	34573.9	Aminoacyl tRNA synthetase complex-interacting multifunctional protein 1 OS=Rattus norvegicus OX=10116 GN=Aimp1 PE=1 SV=1	27.3039	2076.29	9627.51	179.301	3933.2	2537.89	7255.27	1327.7	19489.4	1494.68	7071.81	3720.17
Q5FVC2|ARHG2_RAT;tr|A0A0G2K0V4|A0A0G2K0V4_RAT;tr|A0A1B0GWY5|A0A1B0GWY5_RAT	3	3	109.88	0.165713	0.999949	2.07076	111909	Rho guanine nucleotide exchange factor 2 OS=Rattus norvegicus OX=10116 GN=Arhgef2 PE=1 SV=1	39.4122	12150.2	19004.3	594.242	2574.75	584.369	13132.4	2146.15	4490.28	5030.62	44424.5	3143.4
Q5XIN6|LETM1_RAT	10	9	444.37	0.167152	0.999949	2.13112	83059.8	Mitochondrial proton/calcium exchanger protein OS=Rattus norvegicus OX=10116 GN=Letm1 PE=1 SV=1	575246	494280	416144	1.85187e+06	154996	337972	301732	542378	352826	480367	73695.2	46418.6
P41562|IDHC_RAT	11	9	486.73	0.167773	0.999949	1.58741	46734.5	Isocitrate dehydrogenase [NADP] cytoplasmic OS=Rattus norvegicus OX=10116 GN=Idh1 PE=1 SV=1	490363	230155	363791	436595	528232	685498	238700	288983	517534	257850	20656.1	398980
Q6P7D4|CP20A_RAT;tr|F1LSK6|F1LSK6_RAT	1	1	45.32	0.167812	0.999949	2.76258	51998.1	Cytochrome P450 20A1 OS=Rattus norvegicus OX=10116 GN=Cyp20a1 PE=2 SV=1	90.7941	0	45.8608	2913.08	0	0	71.1031	1489.62	629.941	0	5771.54	462.915
tr|D3ZYH3|D3ZYH3_RAT	2	2	62.45	0.16878	0.999949	12.0126	18593	Nudix hydrolase 11 OS=Rattus norvegicus OX=10116 GN=Nudt10 PE=3 SV=1	23.4892	475.276	3321.48	4.42892	527.73	211.487	817.979	100.388	84.6622	1552.7	40996.5	11272.1
B5DFN2|SAHH2_RAT;tr|A0A140TAI8|A0A140TAI8_RAT	20	7	1096.64	0.169078	0.999949	1.79248	53753.5	S-adenosylhomocysteine hydrolase-like protein 1 OS=Rattus norvegicus OX=10116 GN=Ahcyl1 PE=1 SV=2	825097	467806	1.09093e+06	365499	685929	2.09979e+06	641675	344677	1.05351e+06	465326	74692.6	508035
P80204|TGFR1_RAT;tr|Q5M9H3|Q5M9H3_RAT	1	1	25.46	0.169177	0.999949	94.2237	55999.8	TGF-beta receptor type-1 OS=Rattus norvegicus OX=10116 GN=Tgfbr1 PE=1 SV=1	0	0	0	2.13638	115.398	28.7056	180.312	7.30788	0	8.23339	13527.2	56.2771
P52481|CAP2_RAT	7	6	256.29	0.170325	0.999949	1.71703	52912.4	Adenylyl cyclase-associated protein 2 OS=Rattus norvegicus OX=10116 GN=Cap2 PE=1 SV=1	148542	70139.6	155275	90856.8	141519	406271	33035	47178.9	164295	85419.6	166961	92850.8
P18266|GSK3B_RAT;tr|A0A0G2JSH4|A0A0G2JSH4_RAT	6	4	212.42	0.170637	0.999949	9.398	46742.4	Glycogen synthase kinase-3 beta OS=Rattus norvegicus OX=10116 GN=Gsk3b PE=1 SV=1	4711.97	1273.4	1623.6	1950.48	5796.67	3567.76	11044.9	5279.9	14136.9	1369.42	144328	1687.31
P85845|FSCN1_RAT	25	6	1437.4	0.170661	0.999949	1.70429	54491	Fascin OS=Rattus norvegicus OX=10116 GN=Fscn1 PE=1 SV=2	1.275e+06	727746	621941	1.78354e+06	2.4831e+06	2.64869e+06	1.10718e+06	940065	2.17604e+06	776712	115640	482028
tr|D3ZJA8|D3ZJA8_RAT	2	2	93.17	0.170733	0.999949	76.0806	14232.7	Nuclear envelope phosphatase-regulatory subunit 1 OS=Rattus norvegicus OX=10116 GN=Cnep1r1 PE=3 SV=1	91.4975	307.143	86.2486	6.62183	62.1437	662.079	376.823	51.5186	527.988	89.0811	90894.8	553.511
Q5PQK1|SEP10_RAT;tr|A0A0G2K5F4|A0A0G2K5F4_RAT;tr|A0A0H2UI27|A0A0H2UI27_RAT	3	1	119.79	0.170981	0.999949	2.26088	53039	Septin-10 OS=Rattus norvegicus OX=10116 GN=Septin10 PE=1 SV=1	872.489	485.737	936.638	41.6531	2.71888	25.8905	702.628	753.659	708.155	551.698	2590.06	41.0574
Q641Y8|DDX1_RAT	4	4	128.73	0.171222	0.999949	1.39819	82497.2	ATP-dependent RNA helicase DDX1 OS=Rattus norvegicus OX=10116 GN=Ddx1 PE=1 SV=1	88.4168	2368.31	33728.7	90.2499	1370.35	64.2553	9902.87	362.285	1976.48	1910.68	33555.5	5018.45
tr|O89035|O89035_RAT	1	1	52.92	0.171284	0.999949	3.40164	31454.7	Mitochondrial dicarboxylate carrier OS=Rattus norvegicus OX=10116 GN=Slc25a10 PE=1 SV=1	1602.59	57823.1	15647.7	5005.48	21.431	1895.99	19544.6	15768	89247.1	148191	4492.34	1678.86
tr|D3ZWC6|D3ZWC6_RAT	3	2	96.24	0.171412	0.999949	4.43363	58292.5	Syntrophin, basic 1 (Predicted) OS=Rattus norvegicus OX=10116 GN=Sntb1 PE=1 SV=1	2585.96	15731.6	11484.5	8986.11	5075.59	3769.65	938.935	49158.9	32774.7	10560.5	82289.7	35466.4
Q9WV63|KIF2A_RAT;tr|F1M8L1|F1M8L1_RAT	4	4	159.15	0.172279	0.999949	9.43508	79792.4	Kinesin-like protein KIF2A OS=Rattus norvegicus OX=10116 GN=Kif2a PE=1 SV=2	4322.76	1898.35	4324.72	1248.18	3145.48	4746.72	3591.16	3666.56	3952.76	1854.18	148761	23915.3
F1LYQ8|FARP1_RAT	4	4	150.64	0.172399	0.999949	1.26826	118842	FERM, ARHGEF and pleckstrin domain-containing protein 1 OS=Rattus norvegicus OX=10116 GN=Farp1 PE=1 SV=2	4477.87	3223.57	27343.4	13100.2	32869.1	47534.6	7830.16	1117.16	3002.13	981.48	2876.14	85551.1
tr|D4A7U1|D4A7U1_RAT	3	3	159.26	0.173827	0.999949	21.2582	60303.6	Zyxin OS=Rattus norvegicus OX=10116 GN=Zyx PE=1 SV=1	853.415	180.944	60.8589	4815.67	328.337	216.192	98.0405	43283.3	32251.1	326.317	61060.9	210.886
P03994|HPLN1_RAT;tr|A1A5N6|A1A5N6_RAT	3	2	104.35	0.17393	0.999949	3.9376	40261.7	Hyaluronan and proteoglycan link protein 1 OS=Rattus norvegicus OX=10116 GN=Hapln1 PE=1 SV=2	0.875648	2190.37	3947.14	13.2479	1544.67	60.9077	3908.89	1107.53	60.1654	554.213	20903.3	4010.76
tr|Q99MI5|Q99MI5_RAT	3	3	105.1	0.174347	0.999949	1.64864	33996.9	Spermidine synthase OS=Rattus norvegicus OX=10116 GN=LOC100912604 PE=1 SV=1	20544.8	3720.06	25168.1	13036.2	24402.4	13408.7	4953.22	7024.44	32164.1	7024.37	754.349	8905.58
tr|G3V7N0|G3V7N0_RAT	1	1	64	0.174857	0.999949	3.92773	41851.2	Heparan sulfate 2-O-sulfotransferase 1 OS=Rattus norvegicus OX=10116 GN=Hs2st1 PE=1 SV=1	749.315	1338.81	1048.2	497.627	5309.8	15671.8	2160.71	133.522	623.69	855.284	2241.85	252.057
Q9R1K2|TEN2_RAT;tr|A0A096P6L6|A0A096P6L6_RAT	10	5	381.04	0.175054	0.999949	3.13941	307473	Teneurin-2 OS=Rattus norvegicus OX=10116 GN=Tenm2 PE=1 SV=2	285.91	5432.62	5979.33	95.1822	4632.66	134.85	11469	1113.44	558.332	4011.16	30691.3	4147.09
tr|D4A4F9|D4A4F9_RAT	3	3	94.01	0.175122	0.999949	1.78044	14789.6	RCG20461 OS=Rattus norvegicus OX=10116 GN=Stum PE=1 SV=3	185057	100209	499581	226705	184511	122894	146704	141688	6555.45	76183	254547	115127
tr|D3ZWA8|D3ZWA8_RAT	4	3	120.7	0.175278	0.999949	41.5351	75401.8	Adaptor protein, phosphotyrosine-interacting with PH domain and leucine zipper 1 OS=Rattus norvegicus OX=10116 GN=Appl1 PE=1 SV=3	71.6486	656.36	1452.28	27.6419	867.105	50.9937	1063.93	508.321	53.6627	822.571	125882	1509.89
tr|Q3C2P9|Q3C2P9_RAT	1	1	50.31	0.175603	0.999949	13.9322	50750.3	Sprouty protein with EVH-1 domain 1, related sequence OS=Rattus norvegicus OX=10116 GN=Spred1 PE=2 SV=1	85.783	30.8439	85.2433	127.368	0	418.879	0	0	0.0124268	0	10422.9	0
P46462|TERA_RAT	40	35	2075.74	0.175869	0.999949	1.68893	89348.9	Transitional endoplasmic reticulum ATPase OS=Rattus norvegicus OX=10116 GN=Vcp PE=1 SV=3	3.92901e+06	2.90752e+06	2.21062e+06	4.80176e+06	854947	1.85456e+06	1.98917e+06	1.91276e+06	2.63655e+06	2.38649e+06	470472	408621
F1LM93|YES_RAT;tr|Q99PW1|Q99PW1_RAT	10	2	303.53	0.175951	0.999949	6.59074	60614	Tyrosine-protein kinase Yes OS=Rattus norvegicus OX=10116 GN=Yes1 PE=1 SV=1	368.126	774.96	1693.87	1212.69	5105.03	667.073	2404.82	2923.17	521.637	989.578	49415.7	8477.67
Q5FVJ0|RUFY3_RAT;tr|A0A0G2K6A9|A0A0G2K6A9_RAT	9	7	333.24	0.17626	0.999949	1.5005	52906.9	Protein RUFY3 OS=Rattus norvegicus OX=10116 GN=Rufy3 PE=1 SV=1	460511	518203	281120	271823	312232	518850	372385	349594	200455	405719	24267.4	222214
tr|Q5U3Z5|Q5U3Z5_RAT	3	3	250.29	0.176268	0.999949	3.08028	28316.1	BRI3-binding protein OS=Rattus norvegicus OX=10116 GN=Bri3bp PE=1 SV=1	25157	8335.94	21321.4	81320.1	555213	22219.2	83447.1	162084	1.10455e+06	17050.2	53038.5	777810
tr|A0A0G2JV08|A0A0G2JV08_RAT;tr|A0A0G2K2I0|A0A0G2K2I0_RAT	1	1	22.73	0.176561	0.999949	1.56558	80151.8	SUZ12 polycomb repressive complex 2 subunit OS=Rattus norvegicus OX=10116 GN=Suz12 PE=1 SV=1	48301.4	42697.4	68573.6	119020	21616.8	34545.8	21455.1	53101.2	90465.2	39281.5	3880.14	5638.97
Q5U2Z3|NP1L4_RAT;tr|A0A0H2UHZ2|A0A0H2UHZ2_RAT	5	5	284.69	0.176584	0.999949	2.91855	43916.8	Nucleosome assembly protein 1-like 4 OS=Rattus norvegicus OX=10116 GN=Nap1l4 PE=1 SV=1	42107.4	30626.7	6376.66	20806.2	216494	61481.5	8711.14	5088.96	45155.6	7604.88	14274	48645
Q62651|ECH1_RAT	1	1	26.51	0.176873	0.999949	11.9519	36171.7	Delta(3,5)-Delta(2,4)-dienoyl-CoA isomerase, mitochondrial OS=Rattus norvegicus OX=10116 GN=Ech1 PE=1 SV=2	178.321	1420.36	2188.79	459.79	139.015	242.093	1634.99	87.8935	1658.12	1198.47	48445.1	2293.15
tr|Q5RJK6|Q5RJK6_RAT	2	2	51.35	0.177042	0.999949	1.41812	43359.3	Inositol polyphosphate-1-phosphatase OS=Rattus norvegicus OX=10116 GN=Inpp1 PE=1 SV=1	69996.7	56328	77453.2	24090.1	97716.1	54238.4	56240.5	116654	115248	106356	46259.8	97877.2
tr|D4AE02|D4AE02_RAT	1	1	37.67	0.17705	0.999949	2.69519	46414.8	Uncharacterized protein OS=Rattus norvegicus OX=10116 PE=1 SV=3	3833.44	7970.28	2446.6	4581.02	4037.81	55.0567	2082.81	13235.3	4349.62	7947.51	30259.7	3910.15
D4ABB4|FXL15_RAT	1	1	24.8	0.17719	0.999949	1.84228	33179.5	F-box/LRR-repeat protein 15 OS=Rattus norvegicus OX=10116 GN=Fbxl15 PE=3 SV=1	1962.34	30.8577	0	255.212	64.8828	520.195	0	0	0	0	5187.8	32.2635
tr|F1LVF5|F1LVF5_RAT	1	1	45.46	0.177578	0.999949	4.78644	60186.3	Coiled-coil domain-containing 149 OS=Rattus norvegicus OX=10116 GN=Ccdc149 PE=1 SV=3	262.047	0	143.14	177.637	118.048	1204.78	885.422	1196.34	1211.71	9.38995	3817.64	2000.8
Q7M767|UB2V2_RAT;tr|A0A0G2JU07|A0A0G2JU07_RAT	8	4	415.29	0.178704	0.999949	1.74114	16352.7	Ubiquitin-conjugating enzyme E2 variant 2 OS=Rattus norvegicus OX=10116 GN=Ube2v2 PE=1 SV=3	437699	199781	190580	423537	975972	455192	236855	298093	365195	161336	41089.6	438235
O88370|PI42C_RAT;tr|G3V9W5|G3V9W5_RAT	1	1	35.72	0.178899	0.999949	105.009	47048.6	Phosphatidylinositol 5-phosphate 4-kinase type-2 gamma OS=Rattus norvegicus OX=10116 GN=Pip4k2c PE=1 SV=1	137.151	67.1468	24.1423	288.159	99.0029	138.793	45.2914	109.036	17924.5	49.6363	60772.5	317.394
tr|F7EL93|F7EL93_RAT	1	1	29.03	0.179426	0.999949	21.314	133360	Immunoglobulin superfamily, DCC subclass, member 4 OS=Rattus norvegicus OX=10116 GN=Igdcc4 PE=4 SV=2	263.802	288.556	214.494	4.72281	0	69.2267	28.3531	2177.26	42.1415	201.464	15363.8	107.858
P21451|EDNRB_RAT;tr|F2W8B2|F2W8B2_RAT	1	1	40.5	0.179909	0.999949	1.6191	49454.8	Endothelin receptor type B OS=Rattus norvegicus OX=10116 GN=Ednrb PE=2 SV=2	136978	52464.5	57174.2	25714.8	98428.1	170220	173892	6633.83	35238	31642.6	65113.1	21604.5
P06302|PTMA_RAT;tr|Q63452|Q63452_RAT;tr|Q63453|Q63453_RAT	1	1	53.91	0.180792	0.999949	1.90131	12382.3	Prothymosin alpha OS=Rattus norvegicus OX=10116 GN=Ptma PE=1 SV=2	592280	161990	93920.5	231776	552566	494551	133433	247703	3338.91	67574.7	188533	478167
D3ZML2|BRSK2_RAT;tr|M9MMM8|M9MMM8_RAT	1	1	37.72	0.18112	0.999949	3.44906	81454.8	Serine/threonine-protein kinase BRSK2 OS=Rattus norvegicus OX=10116 GN=Brsk2 PE=1 SV=1	144019	144604	3915.34	154319	166986	152505	33790	26912.3	19202.3	51876.7	72822.7	17586.5
Q6AXR4|HEXB_RAT;tr|F1LR87|F1LR87_RAT	5	5	203.09	0.182269	0.999949	1.99174	61527.6	Beta-hexosaminidase subunit beta OS=Rattus norvegicus OX=10116 GN=Hexb PE=2 SV=1	149814	169510	108283	37471.1	21150.6	141736	177354	374982	361383	205242	83556	48229.3
O08662|PI4KA_RAT;tr|A0A140TAJ5|A0A140TAJ5_RAT	11	11	471.74	0.183207	0.999949	1.91973	236918	Phosphatidylinositol 4-kinase alpha OS=Rattus norvegicus OX=10116 GN=Pi4ka PE=1 SV=2	39937.1	8028.91	38511.8	2454.81	18015.9	3186.74	15759.2	22732.9	35099.6	11176.8	107997	18663.7
tr|B0BNE6|B0BNE6_RAT	3	3	104.44	0.183349	0.999949	3.56715	23970.3	Complex I-23kD OS=Rattus norvegicus OX=10116 GN=Ndufs8 PE=1 SV=1	17111.6	29027.6	2311.44	68055.6	162356	60027	2353.58	37170.1	28526.8	14052.3	4026.79	8873.15
Q62997|GFRA1_RAT;tr|A0A0A0MXY7|A0A0A0MXY7_RAT;tr|O35748|O35748_RAT	1	1	89.26	0.183412	0.999949	7.19386	51650	GDNF family receptor alpha-1 OS=Rattus norvegicus OX=10116 GN=Gfra1 PE=1 SV=1	0	211.551	4218.54	17.5235	268.202	459.616	1909.47	115.725	69.8871	628.57	32337.2	2170.45
Q9EQV6|TPP1_RAT;tr|Q642E6|Q642E6_RAT	4	3	158.32	0.183843	0.999949	1.90173	61332.3	Tripeptidyl-peptidase 1 OS=Rattus norvegicus OX=10116 GN=Tpp1 PE=1 SV=1	17163	4864.67	16422.4	948.523	25023.9	2534.27	13887.1	58674.5	19318.4	6787.29	7224.38	21442
Q5FVN0|MBOA5_RAT	7	7	350.65	0.183849	0.999949	1.40956	56017.8	Lysophospholipid acyltransferase 5 OS=Rattus norvegicus OX=10116 GN=Lpcat3 PE=2 SV=1	251155	344132	166011	123953	224653	414995	366200	545856	423296	380984	269785	163313
tr|Q3KRE3|Q3KRE3_RAT	4	4	193.33	0.18394	0.999949	1.49336	7229.37	Guanine nucleotide-binding protein subunit gamma OS=Rattus norvegicus OX=10116 GN=Gng10 PE=1 SV=1	412057	212850	424352	165410	740325	311400	314857	14122	21900.8	168229	500472	498069
Q9Z2N4|NXPH4_RAT;tr|A0A0G2JSW7|A0A0G2JSW7_RAT	1	1	44.8	0.184287	0.999949	3.09228	32945.2	Neurexophilin-4 OS=Rattus norvegicus OX=10116 GN=Nxph4 PE=2 SV=1	3618.84	2077.01	7384.04	57019.8	25019.3	839.681	5672.84	915.107	190.28	2351.17	328.71	21573.6
Q99P55|SGPP1_RAT;tr|F1LPB0|F1LPB0_RAT	2	2	71.41	0.184402	0.999949	8.7449	47649.2	Sphingosine-1-phosphate phosphatase 1 OS=Rattus norvegicus OX=10116 GN=Sgpp1 PE=1 SV=2	8762.82	97.391	362.323	3618.62	133.072	191.774	239.754	2607.97	30155.3	282.472	79294	2555.87
P23965|ECI1_RAT;tr|Q68G41|Q68G41_RAT	1	1	42.37	0.184821	0.999949	17.0097	32254.4	Enoyl-CoA delta isomerase 1, mitochondrial OS=Rattus norvegicus OX=10116 GN=Eci1 PE=1 SV=1	25697.4	2441.38	3434.96	1545.06	4314.86	8826.88	136811	132596	501696	3387.84	11818.8	565.702
P13599|FCGRN_RAT	1	1	22.4	0.18489	0.999949	4.27254	40168.6	IgG receptor FcRn large subunit p51 OS=Rattus norvegicus OX=10116 GN=Fcgrt PE=1 SV=1	1381.7	673.658	648.431	9149.79	818.334	5743.42	961.247	18703.3	17702.8	733.336	37083.3	3496.19
P49620|DGKG_RAT	1	1	36.75	0.184899	0.999949	24.7865	88521.5	Diacylglycerol kinase gamma OS=Rattus norvegicus OX=10116 GN=Dgkg PE=1 SV=1	44.7611	32.3858	558.902	114.795	775.343	307.786	290.873	9601.43	132.49	57.2883	34767	608.62
Q8K3P6|SCMC2_RAT	5	3	133.66	0.185288	0.999949	2.04927	52695.1	Calcium-binding mitochondrial carrier protein SCaMC-2 OS=Rattus norvegicus OX=10116 GN=Slc25a25 PE=1 SV=1	2259.15	45677.8	15120.7	709.847	2703	28.8735	15453.8	2940.02	6308.16	95561.8	9649.1	6362.46
tr|F1LMV6|F1LMV6_RAT	1	1	24.99	0.185342	0.999949	30.9008	332393	Desmoplakin OS=Rattus norvegicus OX=10116 GN=Dsp PE=1 SV=1	60.9055	43.382	19.7207	30.8737	41.1529	0	99.1332	1854.84	103.317	296.129	3704.22	0
tr|D3ZA84|D3ZA84_RAT	20	11	764.67	0.185638	0.999949	1.73526	271682	Talin 2 OS=Rattus norvegicus OX=10116 GN=Tln2 PE=1 SV=3	56885.1	67060.7	127302	47411	85694.7	161565	86565.5	39591.8	94724.7	54971.8	993.835	37755.1
tr|F1LVX2|F1LVX2_RAT	2	2	62.47	0.185674	0.999949	1.7663	136189	EH domain-binding protein 1 OS=Rattus norvegicus OX=10116 GN=Ehbp1 PE=1 SV=3	44143.4	16946.7	13506.5	17150.7	82771.4	37449.2	10629.4	27893.1	6028.14	17772.6	9131.4	48552.5
A1L1K3|APC5_RAT;tr|A0A0H2UH97|A0A0H2UH97_RAT	1	1	31.26	0.185786	0.999949	1.71697	81739.1	Anaphase-promoting complex subunit 5 OS=Rattus norvegicus OX=10116 GN=Anapc5 PE=2 SV=1	129.999	2409.6	14594.2	185.343	6867.4	0	9296.8	986.621	739.227	2373.96	15485.6	12645.4
G3V9T7|GET3_RAT;tr|Q4G022|Q4G022_RAT	3	2	132.71	0.186128	0.999949	5.59038	38822.8	ATPase Get3 OS=Rattus norvegicus OX=10116 GN=Get3 PE=1 SV=1	9065.63	6863	5551.26	4171.17	5191.82	1623.43	4099.67	5141.65	5387.4	11929.1	145409	9532.48
O35077|GPDA_RAT	8	6	302.44	0.186645	0.999949	3.07269	37452.5	Glycerol-3-phosphate dehydrogenase [NAD(+)], cytoplasmic OS=Rattus norvegicus OX=10116 GN=Gpd1 PE=1 SV=4	87138.1	26156.6	62776.5	103142	361257	1.07208e+06	27300.6	56221.2	57256.3	51117.4	2209.96	363242
D3ZEH5|SIDT2_RAT;tr|A0A0A0MP80|A0A0A0MP80_RAT	3	2	84.97	0.186975	0.999949	8.5586	94527.4	SID1 transmembrane family member 2 OS=Rattus norvegicus OX=10116 GN=Sidt2 PE=1 SV=2	266.792	5196.86	14785.4	56.4737	2115.45	31.7943	21057.2	143.73	481.295	5333.9	147537	17610.6
P48768|NAC2_RAT;tr|F1M9A2|F1M9A2_RAT	8	6	314.56	0.187568	0.999949	1.77343	100523	Sodium/calcium exchanger 2 OS=Rattus norvegicus OX=10116 GN=Slc8a2 PE=1 SV=1	228822	301661	167114	293343	44703.2	51034.1	183032	15230.9	21348.7	225823	148839	18481.6
tr|D3ZFY7|D3ZFY7_RAT;tr|D4A2Q3|D4A2Q3_RAT;tr|D4A404|D4A404_RAT	10	2	382.54	0.187624	0.999949	1.46958	112085	Pleckstrin and Sec7 domain-containing 3 OS=Rattus norvegicus OX=10116 GN=Psd3 PE=1 SV=3	117865	43212.7	378010	6661.64	9476.58	15551.6	121178	116400	90306.1	25756.8	412183	72981.2
tr|D3ZUW0|D3ZUW0_RAT	9	1	362.98	0.187624	0.999949	1.46958	43121.2	Pleckstrin and Sec7 domain-containing 3 OS=Rattus norvegicus OX=10116 GN=Psd3 PE=1 SV=2	33383.7	12239.4	107067	1886.82	2684.12	4404.79	34322.2	32968.7	25578	7295.28	116745	20671
P51583|PUR6_RAT	3	3	93.45	0.188625	0.999949	1.32479	47096.2	Multifunctional protein ADE2 OS=Rattus norvegicus OX=10116 GN=Paics PE=1 SV=3	299973	155084	187885	233779	334053	348632	82228	373117	409409	142497	47963.2	121886
P23574|GBRG1_RAT	3	1	100.77	0.18914	0.999949	1.95382	53550.9	Gamma-aminobutyric acid receptor subunit gamma-1 OS=Rattus norvegicus OX=10116 GN=Gabrg1 PE=2 SV=1	3686.65	3123.79	5793.28	24841.5	15145.1	10782.1	1396.37	5006.49	13817.9	5843.59	2290.1	4080.67
P20595|GCYB1_RAT;tr|Q80WY4|Q80WY4_RAT;tr|Q8CH85|Q8CH85_RAT	3	3	123.88	0.189704	0.999949	2.7654	70456.6	Guanylate cyclase soluble subunit beta-1 OS=Rattus norvegicus OX=10116 GN=Gucy1b1 PE=1 SV=2	111556	9920.07	51496.6	147124	3281.04	55983.9	1553.19	642.035	51716.5	21426.5	54666.1	7177.06
Q6PEC4|SKP1_RAT;tr|A0A0G2K4X8|A0A0G2K4X8_RAT	5	4	198.35	0.189918	0.999949	1.81875	18672	S-phase kinase-associated protein 1 OS=Rattus norvegicus OX=10116 GN=Skp1 PE=1 SV=3	403753	244348	262654	213212	149672	145157	387109	408622	860465	370315	463104	90829.9
Q6KC51|ABLM2_RAT;tr|A0A0G2JTB5|A0A0G2JTB5_RAT;tr|A0A0G2JXC7|A0A0G2JXC7_RAT;tr|A0A0H2UHF9|A0A0H2UHF9_RAT;tr|A0A140TAH7|A0A140TAH7_RAT	1	1	27.74	0.190169	0.999949	182.951	68009.7	Actin-binding LIM protein 2 OS=Rattus norvegicus OX=10116 GN=Ablim2 PE=1 SV=1	28.7142	61.9292	0.469769	0.683771	3.61251	0	24.3878	23.5088	0	52.0132	17346.8	8.52573
tr|D4AEH3|D4AEH3_RAT	2	2	58.63	0.190799	0.999949	3.3868	36491.8	Proteasome (Prosome, macropain) 26S subunit, non-ATPase, 7 (Predicted) OS=Rattus norvegicus OX=10116 GN=Psmd7 PE=1 SV=1	53081.6	42035.9	594220	50200.3	179405	532674	80927.9	45731	87709.1	33983.9	46357.6	133900
tr|M0RCH6|M0RCH6_RAT	7	5	348.34	0.190944	0.999949	2.76044	24812	Charged multivesicular body protein 4B OS=Rattus norvegicus OX=10116 GN=Chmp4b PE=1 SV=2	3.88509e+06	1.42305e+06	432534	9.51517e+06	1.38893e+06	3.94503e+06	2.10438e+06	1.03733e+06	2.0421e+06	941092	34057.7	1.29993e+06
P08753|GNAI3_RAT;tr|Q45QM8|Q45QM8_RAT	25	7	1212.35	0.191254	0.999949	1.36815	40522.2	Guanine nucleotide-binding protein G(i) subunit alpha-3 OS=Rattus norvegicus OX=10116 GN=Gnai3 PE=1 SV=3	681436	439229	620646	643412	1.34391e+06	1.01043e+06	621013	683234	857699	383514	450755	467630
P70615|LMNB1_RAT;tr|G3V7U4|G3V7U4_RAT	1	1	37.25	0.191603	0.999949	1.15188	66606.5	Lamin-B1 OS=Rattus norvegicus OX=10116 GN=Lmnb1 PE=1 SV=3	39.6333	3270.73	7340.97	143.462	19984.4	491.193	9374.61	2073.07	3404.39	3499.69	2296.06	15372
P32198|CPT1A_RAT	7	7	347.23	0.193519	0.999949	5.13979	88125.5	Carnitine O-palmitoyltransferase 1, liver isoform OS=Rattus norvegicus OX=10116 GN=Cpt1a PE=1 SV=2	31155.3	79414.9	69720.2	22890.7	4408.94	33091.1	40045.4	131430	746784	86312.1	226638	5842.48
Q09326|MGAT2_RAT	1	1	25.99	0.193539	0.999949	21.4815	51109.9	Alpha-1,6-mannosyl-glycoprotein 2-beta-N-acetylglucosaminyltransferase OS=Rattus norvegicus OX=10116 GN=Mgat2 PE=1 SV=1	8.4517	127.438	2899.46	0	0	0	1774.65	21.3531	0	46.5725	62517.7	843.538
M0RAS4|IGS21_RAT	3	3	100.65	0.193912	0.999949	29.4854	52044.5	Immunoglobulin superfamily member 21 OS=Rattus norvegicus OX=10116 GN=Igsf21 PE=2 SV=3	167.264	142.926	132.783	162.17	129.508	558.131	21365.5	89.3664	108.823	63.8478	14486.6	2004.05
tr|O54857|O54857_RAT	1	1	25.94	0.194094	0.999949	2.26304	47118.3	Phosphatidylinositol 3,4,5-trisphosphate 3-phosphatase and dual-specificity protein phosphatase PTEN OS=Rattus norvegicus OX=10116 GN=Pten PE=1 SV=1	13.5055	1494.76	2024.52	0	8048.49	26.4217	4533.48	175.098	1065.83	424.056	713.504	19356.7
tr|G3V8E2|G3V8E2_RAT	3	3	89.94	0.194179	0.999949	1.99677	101586	Striatin-interacting protein 1 OS=Rattus norvegicus OX=10116 GN=Strip1 PE=1 SV=2	25.1873	2743.3	26101.4	142.678	6688.31	76.8874	11262.1	1679.47	429.272	2487.72	47230.4	8351.21
Q8CHM1|AQP11_RAT	1	1	30.04	0.194185	0.999949	1.51187	30369.2	Aquaporin-11 OS=Rattus norvegicus OX=10116 GN=Aqp11 PE=2 SV=2	0	26812	25895.5	187.218	146528	1087.65	63362.1	5894.83	2796.97	33086.3	26155.5	171850
tr|A0A0G2JY22|A0A0G2JY22_RAT	6	5	251.45	0.19467	0.999949	2.61421	170920	Disco-interacting protein 2 homolog B OS=Rattus norvegicus OX=10116 GN=Dip2b PE=1 SV=1	14692.7	3488.47	26166.3	29419.3	12223.9	141689	9444.71	2387.42	2749.89	2747.05	48827.8	20936.3
Q8R431|MGLL_RAT	2	2	45.74	0.194729	0.999949	1.57665	33499.7	Monoglyceride lipase OS=Rattus norvegicus OX=10116 GN=Mgll PE=1 SV=1	2825.06	18855.8	44524.8	37.6023	19111.9	1232.93	20857	3475.21	17584.4	14560.9	55928.7	24113.2
P61150|FGF12_RAT;Q8R5L7|FGF14_RAT;tr|A0A7U3L6G2|A0A7U3L6G2_RAT;tr|Q794I6|Q794I6_RAT;tr|Q8R4X0|Q8R4X0_RAT	2	2	57.46	0.195653	0.999949	1.69559	27399.3	Fibroblast growth factor 12 OS=Rattus norvegicus OX=10116 GN=Fgf12 PE=1 SV=1	1108.23	13498.1	15117.6	10464.7	57249.7	2194.72	49599.9	6096.7	44962.1	20260.2	39535	8482.83
tr|F1MAB2|F1MAB2_RAT	11	10	423.09	0.196334	0.999949	3.24062	110577	RIKEN cDNA 5330417C22 gene OS=Rattus norvegicus OX=10116 GN=RGD1310209 PE=3 SV=2	41874.2	8201.21	10360.3	35923.9	71725.5	318055	20285.6	5216.95	3268.37	6245.78	81245.5	33752.3
P62501|T22D1_RAT;tr|D3Z8M8|D3Z8M8_RAT	1	1	43.85	0.196578	0.999949	164.053	15582.6	TSC22 domain family protein 1 OS=Rattus norvegicus OX=10116 GN=Tsc22d1 PE=2 SV=1	627.534	139.703	0	25.9111	1684.42	107.329	475.307	139.553	195.962	68.7548	422093	1087.92
P63312|TYB10_RAT	2	2	114.78	0.196999	0.999949	1.30711	5025.67	Thymosin beta-10 OS=Rattus norvegicus OX=10116 GN=Tmsb10 PE=1 SV=2	1.10351e+06	1.3797e+06	1.01949e+06	500492	1.44724e+06	1.12538e+06	1.46374e+06	1.22058e+06	1.9295e+06	1.97861e+06	900785	1.10209e+06
tr|F6Q5K7|F6Q5K7_RAT;tr|Q6MG10|Q6MG10_RAT	2	2	89.46	0.197252	0.999949	1.68377	29159.2	28S ribosomal protein S18-2, mitochondrial OS=Rattus norvegicus OX=10116 GN=Mrps18b PE=1 SV=1	2.54316	1364.76	3209.3	8.16775	10398.8	152.681	8808.23	120.886	823.633	1354.16	3794.55	10584.6
Q7TMB0|PLPR3_RAT	4	3	130.44	0.19726	0.999949	2.51636	76786.2	Phospholipid phosphatase-related protein type 3 OS=Rattus norvegicus OX=10116 GN=Plppr3 PE=2 SV=1	69200.6	9610.84	14843.5	151245	27258.5	46358.7	1964.46	25480.8	22036.2	13239.7	44618.4	19239.2
Q9Z214|HOME1_RAT;tr|A0A0H2UI35|A0A0H2UI35_RAT	2	2	44.18	0.197858	0.999949	1.14098	41304.9	Homer protein homolog 1 OS=Rattus norvegicus OX=10116 GN=Homer1 PE=1 SV=2	388.446	11604.6	52869.5	110.998	5086.51	304.561	24934.8	3987.51	2551.21	6832.2	9845.73	13519.1
Q810F4|FAM3C_RAT;tr|A0A0G2JUB0|A0A0G2JUB0_RAT	3	3	111.01	0.198145	0.999949	1.75373	24713.6	Protein FAM3C OS=Rattus norvegicus OX=10116 GN=Fam3c PE=2 SV=1	211.082	14651.7	33154.2	514.324	90595	2020.08	34718.1	3571.36	5383.4	20705.3	85132.8	98022.1
Q6DGG9|CAMLG_RAT;tr|A0A1L1WKE8|A0A1L1WKE8_RAT	1	1	34.06	0.198833	0.999949	36.4613	32790.5	Guided entry of tail-anchored proteins factor CAMLG OS=Rattus norvegicus OX=10116 GN=Camlg PE=1 SV=1	822.973	591.807	1120.64	989.181	865.445	300.518	690.596	2230.33	1912.71	383.457	164518	1288.83
P97526|NF1_RAT;tr|A0A0G2JWL3|A0A0G2JWL3_RAT;tr|F1LM28|F1LM28_RAT	5	5	198.96	0.198983	0.999949	1.3463	317083	Neurofibromin OS=Rattus norvegicus OX=10116 GN=Nf1 PE=1 SV=1	1948.76	13062.2	8711.66	168935	65.3767	2562.17	13442	8817.67	56965.7	11093.1	32712	22022.7
tr|G3V8D6|G3V8D6_RAT	1	1	49.91	0.199144	0.999949	2.10407	80760.5	Tripartite motif protein 3, isoform CRA_a OS=Rattus norvegicus OX=10116 GN=Trim3 PE=1 SV=1	31914.4	0	883.439	0	0	0	12932.2	501.575	0	1087.03	616.724	450.313
Q03351|NTRK3_RAT	3	1	82.93	0.19986	0.999949	1.34855	97064.1	NT-3 growth factor receptor OS=Rattus norvegicus OX=10116 GN=Ntrk3 PE=1 SV=2	1684.09	19230.1	13346.4	613.91	1283.7	230.644	12256.2	5793.99	5296.04	20505.3	2154.69	3066
tr|A0A0G2JTA1|A0A0G2JTA1_RAT;tr|D3ZHI9|D3ZHI9_RAT	5	2	190.91	0.20012	0.999949	1.37952	54713.5	Serine/threonine-protein phosphatase 2A 56 kDa regulatory subunit OS=Rattus norvegicus OX=10116 GN=Ppp2r5e PE=1 SV=1	55168.7	6934.91	22913.8	25253.4	76072.3	168167	15198.3	2603.8	2004.36	4882.57	7649.43	456714
tr|A0A0G2K226|A0A0G2K226_RAT;tr|Q32PY7|Q32PY7_RAT	2	2	77.21	0.200964	0.999949	19.389	20071.5	NudC domain-containing 3 (Fragment) OS=Rattus norvegicus OX=10116 GN=Nudcd3 PE=1 SV=1	19.8589	152.684	321.422	1.15409	89.7722	12.7793	175.321	64.949	14.2912	45.6666	10721.8	566.23
tr|A0A0G2JZF0|A0A0G2JZF0_RAT;tr|B5DEG8|B5DEG8_RAT	1	1	31.49	0.201259	0.999949	311.465	114698	SEC24 homolog C, COPII coat complex component OS=Rattus norvegicus OX=10116 GN=Sec24c PE=1 SV=1	4252.4	0	0	0	7.63716	44.0463	0	0	0	13.8189	0	0
P14659|HSP72_RAT;tr|A0A0G2JUT0|A0A0G2JUT0_RAT	28	4	1356.9	0.201324	0.999949	2.10898	69641.8	Heat shock-related 70 kDa protein 2 OS=Rattus norvegicus OX=10116 GN=Hspa2 PE=1 SV=2	1894.16	14999.3	6077.49	1112.79	718.371	20645	17369.2	18506.4	4229.11	19010.2	35268.3	1463.92
tr|D3ZHX3|D3ZHX3_RAT	4	4	166.29	0.201425	0.999949	1.27948	22497.9	DIRAS family GTPase 2 OS=Rattus norvegicus OX=10116 GN=Diras2 PE=4 SV=1	99154.1	106104	91156.1	64228.9	66590	70342.4	86350.7	76435	48536	98418.1	57912.7	21237.3
P48500|TPIS_RAT	22	20	1259.7	0.201788	0.999949	1.70284	26848.9	Triosephosphate isomerase OS=Rattus norvegicus OX=10116 GN=Tpi1 PE=1 SV=2	5.69436e+06	2.49723e+06	2.6921e+06	3.08054e+06	1.26662e+07	1.19824e+07	3.33005e+06	3.76792e+06	1.13369e+07	2.47327e+06	274292	1.49302e+06
P82450|SIAE_RAT;tr|A0A0A0MY22|A0A0A0MY22_RAT	1	1	36.17	0.202035	0.999949	163.614	60466.4	Sialate O-acetylesterase OS=Rattus norvegicus OX=10116 GN=Siae PE=1 SV=2	197.267	0	54.2068	0	172.417	0	42.1055	122.627	188.975	0	68921.1	79.6517
Q64604|PTPRF_RAT	9	2	363.89	0.202071	0.999949	2.08052	211492	Receptor-type tyrosine-protein phosphatase F OS=Rattus norvegicus OX=10116 GN=Ptprf PE=2 SV=1	6.79142	267.001	1379.7	21.3426	7812.57	12.6844	1499.51	47.8272	295.79	476.585	12814.6	4630.79
tr|Q5XIA5|Q5XIA5_RAT	2	2	67.03	0.202393	0.999949	3.41764	62187.6	Coenzyme A synthase OS=Rattus norvegicus OX=10116 GN=Coasy PE=1 SV=1	11.6882	2422.12	7354.03	18.4224	16234	6.36524	5963.72	129.041	285.949	3181.99	65579.7	13877.6
Q6AYA5|T106B_RAT	2	2	86.27	0.203493	0.999949	1.99146	31152.4	Transmembrane protein 106B OS=Rattus norvegicus OX=10116 GN=Tmem106b PE=1 SV=1	297729	167697	50936.6	105910	326139	41554.6	109128	73366.7	20178	149505	8504.18	136424
Q5U206|CALL3_RAT	8	1	270.48	0.203751	0.999949	2.36336	16802.5	Calmodulin-like protein 3 OS=Rattus norvegicus OX=10116 GN=Calml3 PE=2 SV=1	20097.6	7621.65	7059.05	51416.3	3396.73	5902.63	6206.81	7779.67	18314.7	3847.28	2346.63	1911.04
Q64663|P2RX7_RAT;tr|A0A0G2JZT0|A0A0G2JZT0_RAT;tr|C8YIX5|C8YIX5_RAT	1	1	37.63	0.204451	0.999949	1.75206	68391.7	P2X purinoceptor 7 OS=Rattus norvegicus OX=10116 GN=P2rx7 PE=1 SV=1	64.2382	10883.1	26646.2	247.931	30570.9	547.67	20285.1	2277.31	2489.16	6600.54	47158.2	42011.7
tr|G3V8Y8|G3V8Y8_RAT	3	2	99.28	0.204527	0.999949	1.0791	115004	Huntingtin interacting protein 1, isoform CRA_a OS=Rattus norvegicus OX=10116 GN=Hip1 PE=1 SV=1	0.162944	572.61	5331.33	16.6577	22934	11.0099	5284.54	191.761	6057.98	526.674	345.03	18743
tr|D3ZDI9|D3ZDI9_RAT	1	1	22.92	0.204648	0.999949	13.2055	96748.5	Ubiquitin carboxyl-terminal hydrolase OS=Rattus norvegicus OX=10116 GN=Usp13 PE=2 SV=2	18437.7	23583.4	24573.4	34318.2	17908.3	57257	52250.3	72197.6	2.1197e+06	22980.1	38069.2	20001.1
P62024|PHAR1_RAT	2	2	72.99	0.204789	0.999949	43.3634	66216.1	Phosphatase and actin regulator 1 OS=Rattus norvegicus OX=10116 GN=Phactr1 PE=1 SV=1	654.596	0	3.66349	11.5557	107.301	0	425.213	2232.54	0	29.5779	30992.7	18.3199
Q99J86|ATRN_RAT	13	11	608.3	0.205272	0.999949	1.66594	158672	Attractin OS=Rattus norvegicus OX=10116 GN=Atrn PE=2 SV=1	34460.5	88418.5	58868.2	56237.5	133170	227265	23508.5	151421	55470.9	76644.6	8826.83	43336.5
P02466|CO1A2_RAT;tr|A0A0G2K5E8|A0A0G2K5E8_RAT;tr|A0A0G2KAN1|A0A0G2KAN1_RAT;tr|F1LS40|F1LS40_RAT	2	2	72.67	0.205702	0.999949	5.76364	129564	Collagen alpha-2(I) chain OS=Rattus norvegicus OX=10116 GN=Col1a2 PE=1 SV=3	141300	42198.9	71223.5	1.92009e+06	37388.2	112807	53348.3	194518	71471.6	36214.7	13602.2	34236.8
tr|A0A140UHY2|A0A140UHY2_RAT;tr|Q68G39|Q68G39_RAT	3	1	95.27	0.206221	0.999949	15.004	52730.5	Cyclin-dependent kinase 16 OS=Rattus norvegicus OX=10116 GN=Cdk16 PE=1 SV=1	349.098	1823.57	2407.04	177.185	1279.77	168.23	2833.73	456.548	347.249	1046.5	85139.1	3275.05
tr|D3ZX63|D3ZX63_RAT	1	1	70.97	0.206672	0.999949	1.80702	35594.6	Similar to D3Mm3e (Predicted), isoform CRA_a OS=Rattus norvegicus OX=10116 GN=Wdr54 PE=4 SV=1	0	2600.87	25.3667	0	37553.8	0	0	40.0279	23623.1	14986.9	5268.23	28688
Q63321|PLOD1_RAT;tr|D3ZQ74|D3ZQ74_RAT	1	1	32.98	0.206824	0.999949	4.11152	83612.3	Procollagen-lysine,2-oxoglutarate 5-dioxygenase 1 OS=Rattus norvegicus OX=10116 GN=Plod1 PE=1 SV=1	51.03	869.312	2727.88	342.431	450.887	815.689	1671.73	396.766	1731.3	525.915	16502.3	787.158
Q9ES71|GNPAT_RAT	3	3	108.14	0.207905	0.999949	3.39909	77075.8	Dihydroxyacetone phosphate acyltransferase OS=Rattus norvegicus OX=10116 GN=Gnpat PE=1 SV=1	7402.76	1878.62	47687.8	229269	9490.2	40161.5	1230.28	1552.58	2327.64	3093.76	62291.1	28322.3
Q66HA8|HS105_RAT	17	10	955.34	0.208044	0.999949	1.89326	96418.6	Heat shock protein 105 kDa OS=Rattus norvegicus OX=10116 GN=Hsph1 PE=1 SV=1	413986	123900	302764	191117	766123	967268	302953	147729	324139	116990	6218.29	562501
tr|O08769|O08769_RAT;tr|O35792|O35792_RAT	1	1	32.42	0.208244	0.999949	Infinity	22139.3	Cyclin-dependent kinase inhibitor 1B OS=Rattus norvegicus OX=10116 GN=Cdkn1b PE=1 SV=1	0	0	0	0	0	0	9.01762	0	0	0	3267.52	0
tr|F7EPE0|F7EPE0_RAT;tr|Q6P7A4|Q6P7A4_RAT	25	23	1287.06	0.209126	0.999949	1.47985	61453.5	Prosaposin OS=Rattus norvegicus OX=10116 GN=Psap PE=1 SV=2	1.45229e+06	2.44103e+06	2.5951e+06	1.25014e+06	6.83857e+06	4.16057e+06	2.04037e+06	1.37096e+06	6.46375e+06	2.19553e+06	185157	406132
Q6AYQ8|FAHD1_RAT	1	1	42.2	0.209186	0.999949	1.00699	24480.4	Acylpyruvase FAHD1, mitochondrial OS=Rattus norvegicus OX=10116 GN=Fahd1 PE=1 SV=1	78749.8	28145.2	52017.8	13327.1	13904	37666.6	164959	9662.21	365.35	39326	2811.42	8249.93
tr|D3ZRX7|D3ZRX7_RAT;tr|F1M6B6|F1M6B6_RAT	3	3	146.89	0.20967	0.999949	5.99515	111796	Protocadherin 10 OS=Rattus norvegicus OX=10116 GN=Pcdh10 PE=4 SV=2	13.7205	1477.07	336.466	974.579	28.7363	12.731	474.258	292.581	173.133	432.512	15537.6	135.948
Q63372|NRX1A_RAT	26	17	1374.42	0.209716	0.999949	4.7581	167922	Neurexin-1 OS=Rattus norvegicus OX=10116 GN=Nrxn1 PE=1 SV=3	269946	267011	357265	7.20556e+06	1.29579e+06	200878	417683	453399	718226	298852	39131.5	89574.7
tr|M0RC57|M0RC57_RAT	1	1	36.52	0.210074	0.999949	1.76598	47661.2	Small ArfGAP 1 OS=Rattus norvegicus OX=10116 GN=Smap1 PE=1 SV=1	5931.85	2319.14	4286.54	1055.15	10172.2	5834.42	0	3117.34	0	6060.34	1317.75	41776.3
P21575|DYN1_RAT	64	42	3409.59	0.211305	0.999949	2.6687	97295	Dynamin-1 OS=Rattus norvegicus OX=10116 GN=Dnm1 PE=1 SV=2	1.15324e+06	913982	890567	7.47114e+06	542154	4.61374e+06	822914	1.45889e+06	1.83503e+06	920634	538963	263428
tr|A0A0G2K6L9|A0A0G2K6L9_RAT;tr|F1M3J7|F1M3J7_RAT	3	2	106.1	0.211743	0.999949	10.6125	122944	Contactin-associated protein family member 4 OS=Rattus norvegicus OX=10116 GN=Cntnap4 PE=3 SV=1	1621.57	218.862	390.922	535.602	2130.31	693.942	262.222	4989.77	660.45	717.272	49610.8	3096.32
O08730|GLYG_RAT;tr|A0A0G2JXP1|A0A0G2JXP1_RAT	3	2	74.76	0.212073	0.999949	12.1481	37378.2	Glycogenin-1 OS=Rattus norvegicus OX=10116 GN=Gyg1 PE=2 SV=4	1407.06	157.015	702.204	818.066	2343.86	1324.13	653.3	3024.8	1639.42	359.94	72138	4212.31
F1LTE0|TANC2_RAT;tr|A0A0G2K9J0|A0A0G2K9J0_RAT	3	2	96.98	0.213355	0.999949	1.28781	219810	Protein TANC2 OS=Rattus norvegicus OX=10116 GN=Tanc2 PE=1 SV=2	24.039	2057.65	13608.4	413.303	17786.8	16.492	7173.71	369.119	3315.98	2415.72	10172.2	20218.7
tr|B0K010|B0K010_RAT	3	3	150.44	0.214407	0.999949	1.8399	14092	Thioredoxin domain-containing protein 17 OS=Rattus norvegicus OX=10116 GN=Txndc17 PE=1 SV=1	93455.7	41929.8	82995.5	3330.83	3103.63	1867.16	62042	105090	163937	54928.3	5039.51	26036.2
tr|D4A144|D4A144_RAT	10	8	397.33	0.21448	0.999949	1.87286	166073	Adhesion G protein-coupled receptor L1 OS=Rattus norvegicus OX=10116 GN=Adgrl1 PE=1 SV=1	1.22786e+06	546613	350984	1.39832e+06	2.85956e+06	2.49832e+06	401752	1.35959e+06	1.36982e+06	377964	102059	1.1311e+06
Q6XVN8|MLP3A_RAT	3	3	87.63	0.214655	0.999949	2.5722	14272.5	Microtubule-associated proteins 1A/1B light chain 3A OS=Rattus norvegicus OX=10116 GN=Map1lc3a PE=1 SV=1	16100.8	11746.2	20319.7	87474	7703.84	101441	64149.8	23426.1	21438.4	25305.5	340953	154365
tr|F1M269|F1M269_RAT	16	1	630.27	0.214844	0.999949	1.19215	27349.1	Gp_dh_N domain-containing protein OS=Rattus norvegicus OX=10116 PE=1 SV=3	204560	181131	279077	139159	102597	23393.8	99549.7	499104	17285.8	152254	7266.49	4576.84
Q9JJ50|HGS_RAT;tr|A0A140TAH1|A0A140TAH1_RAT	5	4	159.89	0.215031	0.999949	1.18036	86246.2	Hepatocyte growth factor-regulated tyrosine kinase substrate OS=Rattus norvegicus OX=10116 GN=Hgs PE=1 SV=1	28976.4	7426.88	14135.7	15621.1	18842.6	26881.6	6770.69	680.427	1162.15	8338.41	102669	12442.7
O88279|SLIT1_RAT;tr|F1LS74|F1LS74_RAT	3	3	103.08	0.21505	0.999949	2.20911	167498	Slit homolog 1 protein OS=Rattus norvegicus OX=10116 GN=Slit1 PE=1 SV=1	141.113	3014.53	5683.52	47.8336	12409.1	91.5977	10569.5	1758.22	354.965	912.303	20046.8	13606
F1M0Z1|TRIO_RAT;tr|A0A1P0PBZ6|A0A1P0PBZ6_RAT	2	2	62.93	0.215256	0.999949	1.53208	347861	Triple functional domain protein OS=Rattus norvegicus OX=10116 GN=Trio PE=1 SV=4	47.7202	6374.64	21014.2	134.411	33859.1	40.4806	16342	1691.01	1245.55	3651.35	11367.2	59880.7
Q6AYQ4|TM109_RAT	1	1	50.77	0.215597	0.999949	1.64414	26241.9	Transmembrane protein 109 OS=Rattus norvegicus OX=10116 GN=Tmem109 PE=2 SV=1	541055	912587	279528	388993	232618	224758	1.05097e+06	973686	891867	757242	182656	384700
tr|F7F3I7|F7F3I7_RAT	2	1	47.77	0.215769	0.999949	1.77061	83518.8	RCG62756, isoform CRA_a OS=Rattus norvegicus OX=10116 GN=Sema4a PE=3 SV=1	2233.74	4430.06	20792.6	2929.61	13324.1	1372.38	15373.6	8722.08	3464.23	3543.56	25714.9	23005.3
tr|A0A0G2JZM2|A0A0G2JZM2_RAT;tr|B5DFC3|B5DFC3_RAT	2	2	66.67	0.216914	0.999949	1.63789	84713.1	Protein transport protein SEC23 OS=Rattus norvegicus OX=10116 GN=Sec23a PE=1 SV=1	8816.89	7542.89	38641.8	227.116	4364.47	261.383	25543.4	3964.64	3733.67	7059.59	48925.1	8808.76
tr|P70625|P70625_RAT;tr|Q3ZB99|Q3ZB99_RAT	2	1	68.59	0.217092	0.999949	2.16799	90776.7	Zonula occludens 2 protein (Fragment) OS=Rattus norvegicus OX=10116 GN=ZO-2 PE=2 SV=2	1689.24	4782.54	18320.3	2612.41	24958.8	78.4876	13077.6	8119.17	1831.89	5271.58	48749.8	36643.1
P85007|IR3IP_RAT;tr|Q6QI86|Q6QI86_RAT	2	2	53.46	0.217098	0.999949	1.61156	8998.79	Immediate early response 3-interacting protein 1 OS=Rattus norvegicus OX=10116 GN=Ier3ip1 PE=3 SV=1	139578	294907	244281	445825	145687	247213	270172	434038	942448	380379	164827	253671
Q4KM73|KCY_RAT;tr|A0A0G2JSJ2|A0A0G2JSJ2_RAT	8	7	377.03	0.217103	0.999949	1.3406	22169.3	UMP-CMP kinase OS=Rattus norvegicus OX=10116 GN=Cmpk1 PE=1 SV=2	192645	172459	203951	233041	119474	98149.4	172218	231485	46257.7	168398	25820.1	116463
P31423|GRM4_RAT;tr|Q62916|Q62916_RAT	3	2	117.14	0.217893	0.999949	16.5531	101819	Metabotropic glutamate receptor 4 OS=Rattus norvegicus OX=10116 GN=Grm4 PE=1 SV=1	175.233	65.7845	561.881	36.1958	18.4299	95.1443	150.748	46.5677	78.0917	114.302	13933.2	1446.7
Q9JM15|S38A1_RAT	2	1	76.12	0.218191	0.999949	10.5186	53846.5	Sodium-coupled neutral amino acid transporter 1 OS=Rattus norvegicus OX=10116 GN=Slc38a1 PE=1 SV=1	4304.91	182.321	186.429	1727	42143.5	1131.71	6686.24	2175.06	3102.35	346.611	438735	71476.1
P06399|FIBA_RAT;tr|A1L114|A1L114_RAT;tr|Q7TQ70|Q7TQ70_RAT	1	1	35.42	0.218644	0.999949	1.23123	86686	Fibrinogen alpha chain OS=Rattus norvegicus OX=10116 GN=Fga PE=1 SV=3	0	10654.9	60682.5	0	22962.2	0	30380	1524.77	168.543	6720.23	644.679	37151.5
O88941|MOGS_RAT;tr|A0A0G2K8S6|A0A0G2K8S6_RAT;tr|G3V743|G3V743_RAT	13	10	561.6	0.218708	0.999949	1.95647	91871.5	Mannosyl-oligosaccharide glucosidase OS=Rattus norvegicus OX=10116 GN=Mogs PE=1 SV=1	160790	293296	303394	147208	184894	83637.6	351628	468637	720503	355396	343153	56051.3
P29476|NOS1_RAT;tr|D3ZEW7|D3ZEW7_RAT;tr|F1LQL1|F1LQL1_RAT	4	3	123.4	0.218978	0.999949	2.12394	160559	Nitric oxide synthase, brain OS=Rattus norvegicus OX=10116 GN=Nos1 PE=1 SV=1	242.912	463.264	1176.16	22294.1	12859	14458	17736.8	1634.43	22154.4	1851.73	34183.2	31808.1
tr|D4A8H3|D4A8H3_RAT	3	2	105.75	0.218991	0.999949	2.64447	117931	E1 ubiquitin-activating enzyme OS=Rattus norvegicus OX=10116 GN=Uba6 PE=1 SV=1	572.774	2889.53	4537.73	90.5332	1512.23	1725.73	1427.1	2698.35	1768.98	1154.96	19829.1	3079.43
Q5U2R0|MAT2B_RAT;tr|A0A0G2JT30|A0A0G2JT30_RAT	1	1	24.8	0.219114	0.999949	59.135	37374.7	Methionine adenosyltransferase 2 subunit beta OS=Rattus norvegicus OX=10116 GN=Mat2b PE=2 SV=1	77.2755	314.695	1255.24	10.7989	4.20784	22.7333	1964.34	279.979	1.55361	636.436	96433.9	323.165
O35303|DNM1L_RAT	25	23	1379.68	0.220031	0.999949	1.70697	83908.4	Dynamin-1-like protein OS=Rattus norvegicus OX=10116 GN=Dnm1l PE=1 SV=1	449349	491771	324185	358269	1.84004e+06	646516	229176	517494	656400	306482	131627	566681
Q9EPB1|DPP2_RAT	15	15	746.48	0.220045	0.999949	1.37215	55114.4	Dipeptidyl peptidase 2 OS=Rattus norvegicus OX=10116 GN=Dpp7 PE=1 SV=1	423885	251413	249972	225963	731474	371652	87610.4	446158	617019	234690	122790	134676
tr|D3ZV15|D3ZV15_RAT	1	1	38.58	0.220299	0.999949	11.5963	100691	E3 ubiquitin-protein ligase CBL OS=Rattus norvegicus OX=10116 GN=Cbl PE=1 SV=1	207.415	10.6235	0	321.271	20.2974	75.2044	0	0	0	0	7361.47	0
tr|B0K014|B0K014_RAT;tr|D4A9K3|D4A9K3_RAT	2	2	94.7	0.221013	0.999949	1.31238	23394.5	D-aminoacyl-tRNA deacylase OS=Rattus norvegicus OX=10116 GN=Dtd1 PE=1 SV=1	467350	297932	92570.5	30293.3	56174.7	758151	488894	496855	541114	261303	128915	317211
tr|A0A0G2K014|A0A0G2K014_RAT;tr|Q5XI38|Q5XI38_RAT	2	1	55.21	0.221162	0.999949	2.03397	71980.5	Lymphocyte cytosolic protein 1 OS=Rattus norvegicus OX=10116 GN=Lcp1 PE=1 SV=1	472.176	258.584	59.0959	313.662	18591.8	376.03	5211.89	505.181	325.122	3255.47	30823.3	703.425
Q68FQ0|TCPE_RAT	19	14	805.08	0.222292	0.999949	1.47011	59536.8	T-complex protein 1 subunit epsilon OS=Rattus norvegicus OX=10116 GN=Cct5 PE=1 SV=1	621518	203872	389871	126197	391540	280150	285061	481508	314563	228009	23388.2	36858.6
Q6P0K8|PLAK_RAT;tr|P70565|P70565_RAT	6	2	164.64	0.222428	0.999949	13.0934	81800.8	Junction plakoglobin OS=Rattus norvegicus OX=10116 GN=Jup PE=1 SV=1	67.1234	453.066	1328.13	95.143	654.675	150.257	1137.13	545.144	50.6917	756.717	32520.9	975.127
P10686|PLCG1_RAT;tr|G3V845|G3V845_RAT	1	1	31.88	0.222453	0.999949	1.20122	148548	1-phosphatidylinositol 4,5-bisphosphate phosphodiesterase gamma-1 OS=Rattus norvegicus OX=10116 GN=Plcg1 PE=1 SV=1	1114.07	1819.36	8860.55	207.278	880.88	202.487	139.051	53.4332	29.946	35.703	9104.79	1529.86
tr|D3ZR49|D3ZR49_RAT	1	1	22.53	0.222517	0.999949	2.51389	72713.2	alpha-1,2-Mannosidase OS=Rattus norvegicus OX=10116 GN=Man1a2 PE=1 SV=3	65.229	1153.65	1232.55	56.3437	618.365	12768.2	1436.37	2433.64	4080.29	1382.68	30371.2	252.403
Q63560|MAP6_RAT	25	21	1320.27	0.22318	0.999949	3.70528	100485	Microtubule-associated protein 6 OS=Rattus norvegicus OX=10116 GN=Map6 PE=1 SV=1	566588	306392	777118	5.84851e+06	139690	1.58066e+06	494644	508310	861286	324806	116860	182158
O08957|NRN1_RAT;tr|M0RBE5|M0RBE5_RAT	3	3	152.11	0.22334	0.999949	3.17093	15288.7	Neuritin OS=Rattus norvegicus OX=10116 GN=Nrn1 PE=1 SV=1	92905	39812.1	383579	1.48795e+06	271616	74176.9	57834.9	24443.8	105801	45108.8	427291	80638.3
tr|A0A0G2JVV5|A0A0G2JVV5_RAT;tr|Q5U2N2|Q5U2N2_RAT	2	2	55.78	0.224094	0.999949	3.76669	52293.8	Ubiquitin carboxyl-terminal hydrolase OS=Rattus norvegicus OX=10116 GN=Usp14 PE=1 SV=1	72.2803	3260.76	1333.37	372.005	9946.58	159.975	9818.39	521.373	192.603	4964.59	36075.3	5474.17
P97610|SYT12_RAT	2	1	49.04	0.224589	0.999949	2.8369	46608.1	Synaptotagmin-12 OS=Rattus norvegicus OX=10116 GN=Syt12 PE=1 SV=1	103.261	263.498	599.184	8061.12	96.4087	15.1002	459.236	141.254	13853.7	253.804	10499.7	717.559
Q5BJP3|UFM1_RAT	4	4	192.86	0.224898	0.999949	1.70265	9117.57	Ubiquitin-fold modifier 1 OS=Rattus norvegicus OX=10116 GN=Ufm1 PE=3 SV=1	9096.52	2432.26	5931.45	104010	3569.03	70.4098	22237.5	3389.04	78886.1	4363.54	95224.9	8917.04
Q5RK19|SNF8_RAT	1	1	29.85	0.225208	0.999949	88.7487	28884.3	Vacuolar-sorting protein SNF8 OS=Rattus norvegicus OX=10116 GN=Snf8 PE=1 SV=1	54.3132	29.0677	39.8775	0	23.5247	70.9468	41.2965	22.1992	61.8511	5.8821	18822.3	369.756
Q9Z0G8|WIPF3_RAT	2	2	64.38	0.225272	0.999949	4.08858	49380.6	WAS/WASL-interacting protein family member 3 OS=Rattus norvegicus OX=10116 GN=Wipf3 PE=1 SV=1	2.64751	577.991	17088.1	52.1998	1125.22	248.673	2753.47	94.1508	725.705	312.778	33928.9	40255.5
Q9JLZ1|GLRX3_RAT;tr|A0A0G2K5P8|A0A0G2K5P8_RAT	2	2	78.8	0.225579	0.999949	1.86032	37849.5	Glutaredoxin-3 OS=Rattus norvegicus OX=10116 GN=Glrx3 PE=1 SV=2	27073.5	5090.71	11431.4	2646.17	1879.29	2691.6	1334.73	5845.43	716.041	1653.93	16928.5	835.367
P58751|RELN_RAT;tr|F1LM29|F1LM29_RAT;tr|F1LZI7|F1LZI7_RAT	3	3	140.87	0.225593	0.999949	2.15335	387532	Reelin OS=Rattus norvegicus OX=10116 GN=Reln PE=2 SV=1	49782.4	2525.66	6357.87	81069.6	49459.2	94705	3237.83	485.084	20184	1561.85	70270.5	36101.9
P70580|PGRC1_RAT	10	8	545.73	0.225986	0.999949	2.26579	21598	Membrane-associated progesterone receptor component 1 OS=Rattus norvegicus OX=10116 GN=Pgrmc1 PE=1 SV=3	271128	480025	702197	1.53996e+06	4.03691e+06	282598	486199	415161	1.72589e+06	400416	47795.2	152029
P47863|AQP4_RAT	5	4	184.55	0.226532	0.999949	2.02981	34480.2	Aquaporin-4 OS=Rattus norvegicus OX=10116 GN=Aqp4 PE=1 SV=1	290626	28078	13088.3	179978	197662	122566	20963.2	19591.5	31728.1	28426.4	30166.8	279013
Q5M7A7|CNRP1_RAT	9	9	423.88	0.227245	0.999949	1.83038	18658.4	CB1 cannabinoid receptor-interacting protein 1 OS=Rattus norvegicus OX=10116 GN=Cnrip1 PE=1 SV=1	1.00542e+06	459901	1.04448e+06	794903	2.72693e+06	3.46326e+06	668349	833187	1.28905e+06	510918	57933.8	1.82796e+06
tr|A2RRU2|A2RRU2_RAT	2	1	95.67	0.227926	0.999949	1.18468	25857.8	RCG26229, isoform CRA_a OS=Rattus norvegicus OX=10116 GN=Tmem127 PE=2 SV=1	5021.79	7688.86	143.716	0	265893	4478.19	176887	12146.1	25102.9	8858.16	14551.3	1526.87
tr|B0BNB9|B0BNB9_RAT	1	1	22.73	0.227932	0.999949	6.39072	49094.4	HtrA serine peptidase 2 OS=Rattus norvegicus OX=10116 GN=Htra2 PE=1 SV=1	563.645	337.76	48.0425	47.903	5475.92	33.0352	397.119	406.782	0	164.158	47.5479	2.47977
tr|Q6AY02|Q6AY02_RAT	1	1	23.31	0.228023	0.999949	40.7774	45348	Splicing factor 45 OS=Rattus norvegicus OX=10116 GN=Rbm17 PE=1 SV=1	0	0	0	28.9442	16.4929	0	19.5494	11.359	0	0	1796.06	25.8387
Q63941|RAB3B_RAT;tr|Q6P9W6|Q6P9W6_RAT	7	2	294.65	0.228082	0.999949	2.33895	24784.9	Ras-related protein Rab-3B OS=Rattus norvegicus OX=10116 GN=Rab3b PE=1 SV=2	135506	19866.2	14127.3	56579.4	144618	6541.88	20233.4	1059.85	8529.65	10203.2	23648.8	97610.9
O08719|EVL_RAT;tr|F1M8I7|F1M8I7_RAT	1	1	34.73	0.228161	0.999949	2.28046	45152.3	Ena/VASP-like protein OS=Rattus norvegicus OX=10116 GN=Evl PE=1 SV=2	3572.04	122.5	332.589	4868.21	125.235	25.1684	154.542	4740.84	3045.59	168.501	9079.87	3439.09
tr|D4A4W6|D4A4W6_RAT	2	2	69.58	0.228344	0.999949	1.90137	12576.2	RCG20695, isoform CRA_b OS=Rattus norvegicus OX=10116 GN=Slirp PE=1 SV=1	21799	13477.1	6232.93	3797.36	5900.1	2266.19	1425.55	9029.01	4482.77	8057.92	1545.67	3582.31
P84079|ARF1_RAT	21	10	1021.04	0.228356	0.999949	1.25879	20696.8	ADP-ribosylation factor 1 OS=Rattus norvegicus OX=10116 GN=Arf1 PE=1 SV=2	4.402e+06	3.59665e+06	3.59756e+06	2.89249e+06	4.11778e+06	3.90444e+06	3.8456e+06	3.34372e+06	5.24633e+06	3.23067e+06	1.62949e+06	587141
Q9WTR7|SC11C_RAT;tr|G3V878|G3V878_RAT	4	3	98	0.228777	0.999949	3.31492	21646.3	Signal peptidase complex catalytic subunit SEC11C OS=Rattus norvegicus OX=10116 GN=Sec11c PE=2 SV=3	1406.89	11551	8183.32	710.074	2553.99	551.585	5931.28	12814.3	339.652	7878.95	46936.8	8829.06
tr|A0A0G2JSU4|A0A0G2JSU4_RAT	21	19	1276.48	0.229311	0.999949	1.93329	39255.5	Protein NDRG2 OS=Rattus norvegicus OX=10116 GN=Ndrg2 PE=1 SV=1	1.62404e+06	674332	974973	221368	3.09037e+06	1.33647e+06	484241	266458	293851	619315	700826	1.73275e+06
tr|F2Z3Q8|F2Z3Q8_RAT	13	11	576.73	0.229634	0.999949	2.39882	97184.1	Importin subunit beta-1 OS=Rattus norvegicus OX=10116 GN=Kpnb1 PE=1 SV=1	380517	39948.5	269199	52083.9	802667	741386	148941	147461	39893.5	38176.3	32438.8	545976
tr|B0BN65|B0BN65_RAT	5	2	192.28	0.23045	0.999949	1.56698	37328.9	Family with sequence similarity 49, member A OS=Rattus norvegicus OX=10116 GN=Fam49a PE=1 SV=1	228383	64311.1	93645.4	219862	226891	298984	181953	88868.6	121539	107616	45902.4	176578
Q5RK23|ABHD1_RAT	3	3	124.22	0.230627	0.999949	5.24913	45557.5	Protein ABHD1 OS=Rattus norvegicus OX=10116 GN=Abhd1 PE=2 SV=1	45177.3	4232.55	921.13	159305	170215	84261.2	5136.93	1286.23	53707	4586.48	5519.26	18181
Q3MHU5|RETR2_RAT;tr|A0A0G2K1U5|A0A0G2K1U5_RAT	1	1	46.38	0.230705	0.999949	1.5907	57659.1	Reticulophagy regulator 2 OS=Rattus norvegicus OX=10116 GN=Retreg2 PE=1 SV=2	20054.2	53251.1	23246.1	14347.8	122553	4134.24	50292.9	1235.56	251.102	35429.2	1522.47	60628.8
tr|D3ZS75|D3ZS75_RAT	1	1	20.85	0.231157	0.999949	88.0469	8786.28	Complex I-KFYI OS=Rattus norvegicus OX=10116 GN=Ndufc1 PE=1 SV=1	0.456407	35.8742	79.006	0	0	0.407858	148.489	0.0356443	0.106756	41.1702	9980.98	20.1688
tr|A0A1B0GWV4|A0A1B0GWV4_RAT;tr|A0A1B0GWY3|A0A1B0GWY3_RAT	1	1	30.34	0.231244	0.999949	3.65213	5438.46	Translocase of outer mitochondrial membrane 5 OS=Rattus norvegicus OX=10116 GN=Tomm5 PE=1 SV=1	1232.12	19214.6	34263.9	2340.3	16742.4	654.12	29438.2	7573.99	1659.29	11793.7	188601	32825.4
Q562B5|PGAM5_RAT;tr|G3V9N1|G3V9N1_RAT	5	4	138.91	0.231422	0.999949	7.41368	32060.5	Serine/threonine-protein phosphatase PGAM5, mitochondrial OS=Rattus norvegicus OX=10116 GN=Pgam5 PE=2 SV=1	326.815	12015.8	20032.6	379.313	442.19	519.425	14459.5	489.411	404.893	3449.08	134491	96666.4
P60203|MYPR_RAT	12	10	659.95	0.231685	0.999949	2.08568	30077.2	Myelin proteolipid protein OS=Rattus norvegicus OX=10116 GN=Plp1 PE=1 SV=2	4.34907e+06	4.42944e+06	4.23053e+06	664876	5.64313e+06	1.24174e+07	2.52366e+06	3.13789e+06	1.35362e+06	4.91565e+06	662273	2.62231e+06
Q4FZT9|PSMD2_RAT	15	12	580.19	0.231879	0.999949	2.18806	100188	26S proteasome non-ATPase regulatory subunit 2 OS=Rattus norvegicus OX=10116 GN=Psmd2 PE=1 SV=1	4054.27	26327.2	57708.1	75237	33103.8	31272.2	141562	16076.3	189589	22654.7	70673.9	57670.3
tr|G3V8L7|G3V8L7_RAT;tr|Q9JI30|Q9JI30_RAT	10	3	414.92	0.232843	0.999949	2.26189	127192	Integrin alpha M OS=Rattus norvegicus OX=10116 GN=Itgam PE=1 SV=1	10564.8	4949.12	3766.22	20519.9	41953.8	6916.3	8827.42	8919.48	7376.33	5217.23	2146.75	6714.55
tr|Q4V8H2|Q4V8H2_RAT	3	2	102.21	0.233522	0.999949	8.77776	76671	SEC3-like 1 (S. cerevisiae) OS=Rattus norvegicus OX=10116 GN=Exoc1 PE=2 SV=1	18.2914	449.645	1018.29	39.972	2150.13	37.8931	963.963	451.272	38.1263	195.768	26899.9	4053.56
tr|F1M949|F1M949_RAT	1	1	22.92	0.233702	0.999949	2.50111	187919	Cytoskeleton-associated protein 5 OS=Rattus norvegicus OX=10116 GN=Ckap5 PE=1 SV=3	1339.03	8960.32	28574.2	1574.32	3437.47	187.249	8390.33	1764.05	3088.06	8137.64	79024	9826.26
Q9Z1W6|LYRIC_RAT	3	3	161.69	0.23419	0.999949	2.00991	63969.2	Protein LYRIC OS=Rattus norvegicus OX=10116 GN=Mtdh PE=1 SV=2	70072.4	226426	122207	20948.9	163276	258374	64501.4	98982.9	40711.1	118888	101600	3845.58
tr|Q5U2X8|Q5U2X8_RAT	5	4	166.35	0.235022	0.999949	1.76636	50443.5	Acyl-CoA thioesterase 9 OS=Rattus norvegicus OX=10116 GN=Acot9 PE=1 SV=1	228924	306196	78682.7	8812.59	45150.3	7283.35	347150	237768	258705	283603	32600	32553.4
D4A055|CACB4_RAT	4	3	139.76	0.236178	0.999949	1.59456	57964.1	Voltage-dependent L-type calcium channel subunit beta-4 OS=Rattus norvegicus OX=10116 GN=Cacnb4 PE=1 SV=2	17154.6	15765.6	36340.6	6163.73	12830.7	6046.9	871.171	2126.68	10377.2	22113.7	11366.9	12284.1
P39069|KAD1_RAT	4	4	191.72	0.236222	0.999949	1.65983	21583.8	Adenylate kinase isoenzyme 1 OS=Rattus norvegicus OX=10116 GN=Ak1 PE=1 SV=3	32473.9	30006.1	40914.7	18708.8	134799	66020.8	72565.2	81465.7	135080	41453.8	24924.1	180510
P56819|BACE1_RAT	4	4	160.11	0.236376	0.999949	8.8379	55806.9	Beta-secretase 1 OS=Rattus norvegicus OX=10116 GN=Bace1 PE=2 SV=1	1265.02	3839.53	5402.5	502.492	5734.01	2154.9	7988.32	2948.12	745.597	1757.62	123654	29928.5
Q91ZS3|CAB45_RAT;tr|A0A0G2JSR9|A0A0G2JSR9_RAT	2	2	58.49	0.236609	0.999949	2.27056	42075.1	45 kDa calcium-binding protein OS=Rattus norvegicus OX=10116 GN=Sdf4 PE=1 SV=1	4199.81	12687.6	5898.55	10836.5	8136.13	34814.5	28668.5	4507.08	27812.6	19849.7	85020.4	8005
tr|B2RYG2|B2RYG2_RAT;tr|F1LQJ7|F1LQJ7_RAT	3	3	92.93	0.236687	0.999949	12.2058	73272	Phosphoenolpyruvate carboxykinase (GTP) (Fragment) OS=Rattus norvegicus OX=10116 GN=Pck2 PE=2 SV=1	5492.71	583.609	218.073	1002.35	328.13	2196	15679.1	179.935	64382.7	1375.17	37951.4	303.529
tr|D3ZFS7|D3ZFS7_RAT	1	1	44.91	0.236871	0.999949	64.5179	26069.7	Lysophospholipase-like 1 OS=Rattus norvegicus OX=10116 GN=Lyplal1 PE=3 SV=2	39.8003	0	110.488	0	723.701	0	38.7255	0	51.4397	45.881	55352.5	899.425
tr|G3V8G2|G3V8G2_RAT	2	2	80.33	0.237023	0.999949	1.97646	55853	26S proteasome non-ATPase regulatory subunit 5 OS=Rattus norvegicus OX=10116 GN=Psmd5 PE=1 SV=1	11944.6	3783.84	62037.3	22.9641	7189.25	1855.27	10337.6	12611.1	87802.2	13622.4	45862.2	1386.63
P60881|SNP25_RAT	34	27	1891.63	0.237384	0.999949	1.35671	23315.1	Synaptosomal-associated protein 25 OS=Rattus norvegicus OX=10116 GN=Snap25 PE=1 SV=1	3.32313e+06	2.85437e+06	2.82076e+06	1.50605e+06	3.50985e+06	2.4773e+06	1.16166e+06	2.84625e+06	3.28348e+06	2.28558e+06	185949	2.3926e+06
tr|D4A772|D4A772_RAT	4	3	124.1	0.237675	0.999949	13.9621	70926.5	Dystrobrevin OS=Rattus norvegicus OX=10116 GN=Dtna PE=1 SV=3	207.457	70.0996	282.962	224.082	1364.45	176.089	649.465	154.842	225.898	322.176	30375.5	735.874
P61765|STXB1_RAT	56	47	3319.94	0.238574	0.999949	1.67423	67568.8	Syntaxin-binding protein 1 OS=Rattus norvegicus OX=10116 GN=Stxbp1 PE=1 SV=1	8.90444e+06	1.93247e+06	5.69577e+06	2.09061e+06	5.17782e+06	9.72589e+06	2.66988e+06	4.39737e+06	6.95382e+06	2.07731e+06	209097	3.71779e+06
tr|D3ZMS0|D3ZMS0_RAT	2	2	107.01	0.238661	0.999949	1.83484	13194.1	Protein C10 OS=Rattus norvegicus OX=10116 GN=LOC100911713 PE=1 SV=1	80416.8	19470.2	23723.8	18518.1	114676	5527.96	20783.1	207.002	4824.17	14820.5	12609.6	89729.2
tr|F1MAH6|F1MAH6_RAT	2	2	72.71	0.238939	0.999949	2.05512	88036.4	Cadherin 11 OS=Rattus norvegicus OX=10116 GN=Cdh11 PE=1 SV=1	0	4085.13	14154.4	137.776	7075.49	823.96	11369.4	516.85	1850.05	2200.75	8924.42	29140.5
Q99N37|RHG17_RAT;tr|D4AAV2|D4AAV2_RAT;tr|D4AAV4|D4AAV4_RAT;tr|F1M6X7|F1M6X7_RAT	1	1	41.84	0.239306	0.999949	41.6833	93753.7	Rho GTPase-activating protein 17 OS=Rattus norvegicus OX=10116 GN=Arhgap17 PE=1 SV=1	27.4028	32.9767	312.234	0	129.003	0	37.609	0	150.352	110.79	19125.5	1484.81
Q5U1Z2|TPPC3_RAT	2	1	51.81	0.240077	0.999949	2.46286	20302.1	Trafficking protein particle complex subunit 3 OS=Rattus norvegicus OX=10116 GN=Trappc3 PE=2 SV=1	10828.5	818.052	7302.05	7342.11	558.028	304.387	62.5721	12.1083	37.8584	2065.97	64244.9	451.021
tr|D3ZZZ9|D3ZZZ9_RAT	8	6	325.05	0.24036	0.999949	3.20339	104072	Catenin (Cadherin associated protein), delta 1 (Predicted), isoform CRA_a OS=Rattus norvegicus OX=10116 GN=Ctnnd1 PE=1 SV=1	16010.6	290.682	1281.71	11592.2	7787.01	425.582	18849	4188.67	4725.28	990.841	82385.4	8628.25
tr|F1LWZ8|F1LWZ8_RAT	1	1	32.55	0.240523	0.999949	6.50007	99496.8	LEM domain-containing 3 OS=Rattus norvegicus OX=10116 GN=Lemd3 PE=1 SV=2	503.109	145.567	34.4581	482.203	223.932	0.0318965	661.005	84.2416	42.8263	268.868	7488.9	484.703
O55173|PDPK1_RAT	2	2	74.64	0.241307	0.999949	1.84108	63593.4	3-phosphoinositide-dependent protein kinase 1 OS=Rattus norvegicus OX=10116 GN=Pdpk1 PE=1 SV=2	5309.41	4664.98	5968.55	37738.3	664.742	22827.5	49.5387	0	19075.3	7592.25	12272.9	2927.39
tr|D3ZF86|D3ZF86_RAT	3	3	136.23	0.242028	0.999949	18.6322	213037	ARFGEF family member 3 OS=Rattus norvegicus OX=10116 GN=Arfgef3 PE=1 SV=3	148.785	312.652	51.5078	31.324	8.72673	13.6336	23.9743	28.4519	200.257	96.9384	10029.9	178.027
tr|B0BMW0|B0BMW0_RAT	9	6	431.42	0.24208	0.999949	1.91342	23896.9	Ras-related protein Rab-14 OS=Rattus norvegicus OX=10116 GN=Rab14 PE=1 SV=1	528632	274236	349696	36597.7	537409	239572	68287.6	350128	294902	191460	20717.5	102062
Q63396|TCP4_RAT	3	2	127.95	0.242383	0.999949	1.97377	14441.5	Activated RNA polymerase II transcriptional coactivator p15 OS=Rattus norvegicus OX=10116 GN=Sub1 PE=1 SV=3	392.703	6277.65	47632.3	734.211	955.944	436.278	17522.3	727.82	2588.45	3573.11	7594.47	79371.9
P04550|PTMS_RAT;tr|B3DM95|B3DM95_RAT	1	1	45.64	0.242756	0.999949	1.04415	11558.9	Parathymosin OS=Rattus norvegicus OX=10116 GN=Ptms PE=1 SV=2	0	25878.8	240269	67.5851	14684.6	874.51	71837.5	697.238	4055.37	12649	41894.5	163080
tr|F1M0K6|F1M0K6_RAT	2	1	81.85	0.244172	0.999949	1.34647	20385	60S ribosomal protein L18a OS=Rattus norvegicus OX=10116 PE=3 SV=2	246097	238151	142393	135756	61176.5	174750	199857	48816.3	13897.3	302994	80244	95627.5
tr|F1M4G6|F1M4G6_RAT	17	1	837.36	0.244238	0.999949	1.27133	33984.7	Gp_dh_N domain-containing protein OS=Rattus norvegicus OX=10116 PE=3 SV=1	1.00916e+06	125040	852971	468245	270385	266224	72129.2	1.22887e+06	773418	65248.7	19607.9	194192
tr|Q6AYD5|Q6AYD5_RAT	4	3	159.46	0.244308	0.999949	1.43099	68751.8	Eukaryotic peptide chain release factor GTP-binding subunit ERF3B-like OS=Rattus norvegicus OX=10116 GN=Gspt1 PE=1 SV=1	28836.1	21878.9	44402	64958.5	114887	19421.1	34561.5	8559.6	28189	19064.3	3551.83	111794
Q9WUD2|TRPV2_RAT;tr|A0A0G2JSH6|A0A0G2JSH6_RAT	12	11	493.66	0.244715	0.999949	2.79981	86706.1	Transient receptor potential cation channel subfamily V member 2 OS=Rattus norvegicus OX=10116 GN=Trpv2 PE=1 SV=2	740068	740587	250736	5.9847e+06	553776	1.94608e+06	688289	1.05745e+06	655877	795323	58150.6	393708
Q6P7Q1|BABA2_RAT	2	2	66.52	0.245432	0.999949	10.5518	43558.7	BRISC and BRCA1-A complex member 2 OS=Rattus norvegicus OX=10116 GN=Babam2 PE=1 SV=1	42.3798	465.264	3263.87	69.6317	606.745	515.215	1548.89	140.473	406.205	152.448	32431.7	17690.1
P20069|MPPA_RAT;tr|F1M964|F1M964_RAT;tr|Q68FX8|Q68FX8_RAT	2	2	52.29	0.245485	0.999949	1.33433	58607.6	Mitochondrial-processing peptidase subunit alpha OS=Rattus norvegicus OX=10116 GN=Pmpca PE=1 SV=1	5661.49	830.505	2387.36	22920.8	851.161	1032.61	12.2804	63.2452	67.6398	1821.73	11199.4	12079.8
tr|Q62669|Q62669_RAT;tr|Q63011|Q63011_RAT;tr|Q6PDU6|Q6PDU6_RAT	13	1	753.09	0.245526	0.999949	1.71503	16022.5	Globin a1 OS=Rattus norvegicus OX=10116 GN=LOC103694855 PE=1 SV=1	1.86803e+06	940226	1.88251e+06	2.20935e+06	6.76461e+06	6.12115e+06	1.20171e+06	1.47179e+06	2.52532e+06	911638	643259	4.78303e+06
B5DF89|CUL3_RAT;tr|A0A0G2JSP3|A0A0G2JSP3_RAT	3	2	80.29	0.245652	0.999949	1.42514	88932.2	Cullin-3 OS=Rattus norvegicus OX=10116 GN=Cul3 PE=1 SV=2	251.505	3403.8	12449.7	3692.27	5025.7	2114.11	8722.25	10440.4	4822.46	1890.18	6090.18	6423.62
tr|D4A5J1|D4A5J1_RAT	1	1	51.51	0.245906	0.999949	1.93882	67849.1	Kelch repeat and BTB domain-containing 11 OS=Rattus norvegicus OX=10116 GN=Kbtbd11 PE=1 SV=1	340.167	0	12.2857	129.669	0	102.562	0	0	0	0	1133.59	0
Q63374|NRX2A_RAT;tr|D3ZAD6|D3ZAD6_RAT	18	10	788.08	0.245992	0.999949	1.24956	185168	Neurexin-2 OS=Rattus norvegicus OX=10116 GN=Nrxn2 PE=1 SV=3	99995	79444.2	102491	123947	194063	149682	101986	126867	255085	72711	35130.9	8129.69
tr|D3Z9C7|D3Z9C7_RAT;tr|F1M7V4|F1M7V4_RAT	1	1	34.79	0.246175	0.999949	1.67841	395346	Protein piccolo OS=Rattus norvegicus OX=10116 GN=Pclo PE=1 SV=3	1223.54	1598.09	8190.61	7708.1	14725.5	12068.8	2972.92	3318.88	747.577	3602.73	166.705	16309
tr|Q99PV2|Q99PV2_RAT	2	1	69.07	0.247408	0.999949	4.875	68020.6	Syntaxin binding protein 3, isoform CRA_a OS=Rattus norvegicus OX=10116 GN=Stxbp3 PE=1 SV=1	990.299	361.987	764.421	691.5	625.091	115.133	734.855	607.099	1033.76	369.235	13986.4	567.247
tr|D3ZME3|D3ZME3_RAT	17	1	645.08	0.248669	0.999949	1.55879	33427.6	Gp_dh_N domain-containing protein OS=Rattus norvegicus OX=10116 PE=1 SV=1	227199	160945	270219	121902	184166	12343.1	109135	319851	686.215	121962	5843.85	69146.2
P28494|MA2A1_RAT	2	1	77.89	0.249329	0.999949	22.4795	131242	Alpha-mannosidase 2 OS=Rattus norvegicus OX=10116 GN=Man2a1 PE=1 SV=2	60.6382	191.337	95.4227	52.5725	9.99916	63.2656	25.7382	33.3677	94.8144	220.96	10014.7	248.469
D3ZF92|TNR21_RAT	2	2	81.23	0.249528	0.999949	4.45127	71869.6	Tumor necrosis factor receptor superfamily member 21 OS=Rattus norvegicus OX=10116 GN=Tnfrsf21 PE=1 SV=1	97.9754	341.611	2208.4	120.014	5064.52	2824.07	1357.45	1385.35	3051.63	120.925	18802.4	22717.6
P53812|PIPNB_RAT	9	3	360.42	0.249547	0.999949	2.30312	31450	Phosphatidylinositol transfer protein beta isoform OS=Rattus norvegicus OX=10116 GN=Pitpnb PE=1 SV=2	1779.13	12466.5	36010.2	109.244	18737.4	501.117	13806.1	3001.26	3179.89	9108.89	114860	16349.4
P23347|B3A2_RAT	1	1	38.74	0.249906	0.999949	87.1939	136636	Anion exchange protein 2 OS=Rattus norvegicus OX=10116 GN=Slc4a2 PE=1 SV=1	0	0	15.6017	0.246695	0	55.722	2.38443	0.0348797	0	28.5144	5964.69	244.877
tr|A0A0G2KAP1|A0A0G2KAP1_RAT	3	2	91.78	0.249945	0.999949	2.26872	53431.1	Endoplasmic reticulum oxidoreductase 1 beta OS=Rattus norvegicus OX=10116 GN=Ero1b PE=1 SV=1	3673.13	4601.66	4559.13	540.864	671.904	10974.7	4417.66	6474.18	15481.3	5164.19	24400.5	828.483
tr|F1LQ83|F1LQ83_RAT	3	3	141.54	0.250088	0.999949	3.24405	22639.5	TMEM9 domain family, member B OS=Rattus norvegicus OX=10116 GN=Tmem9b PE=1 SV=2	34725.4	49637.9	36559	248938	248703	841004	83267.8	28348.3	68666.4	98758.6	7150.18	163730
tr|F1MA42|F1MA42_RAT	2	1	80.97	0.250152	0.999949	3.21456	107502	Seizure-related 6 homolog OS=Rattus norvegicus OX=10116 GN=Sez6 PE=1 SV=2	7.89163	7597.38	27192	108.044	2935.92	2711.23	13076.5	1299.55	755.056	4854.83	102867	7504.94
tr|A0A0G2K3H0|A0A0G2K3H0_RAT;tr|F1MAG7|F1MAG7_RAT	2	2	81.89	0.250228	0.999949	2.3006	161921	Protein-tyrosine-phosphatase OS=Rattus norvegicus OX=10116 GN=Ptpru PE=3 SV=1	9.06022	1237.3	1787.72	61.3162	5884.88	0.0274322	1211.89	10.5864	3394.02	745.663	10104.4	5193.56
H1UBN0|CPNE7_RAT;tr|D3ZWR4|D3ZWR4_RAT	7	5	253.2	0.250919	0.999949	1.68129	61978.2	Copine-7 OS=Rattus norvegicus OX=10116 GN=Cpne7 PE=1 SV=1	74619.5	66134	232096	27974.7	14176.3	5041.2	157400	118496	287280	72063	16289	54683.6
tr|Q5PQZ9|Q5PQZ9_RAT	5	4	293.09	0.250922	0.999949	1.39424	14358.8	NADH dehydrogenase [ubiquinone] 1 subunit C2 OS=Rattus norvegicus OX=10116 GN=Ndufc2 PE=1 SV=1	89757.3	183825	62157.3	6166.75	10017.3	4519.81	64629.4	120752	139336	124956	33300	13995
Q8R491|EHD3_RAT;tr|A0A0G2JTH6|A0A0G2JTH6_RAT	11	5	373.15	0.251048	0.999949	1.75786	60791.1	EH domain-containing protein 3 OS=Rattus norvegicus OX=10116 GN=Ehd3 PE=1 SV=2	305638	122238	209977	106173	345467	1.47117e+06	229861	299429	771578	123094	3807.44	28928.3
tr|Q06QG6|Q06QG6_RAT	5	5	320.74	0.251254	0.999949	1.62101	68588.1	NADH-ubiquinone oxidoreductase chain 5 OS=Rattus norvegicus OX=10116 GN=ND5 PE=3 SV=1	157893	1.20615e+06	265506	10758.7	847001	12845.1	1.16884e+06	286524	347146	1.56374e+06	57582.8	628940
Q62784|INP4A_RAT;tr|D3ZBL5|D3ZBL5_RAT	2	2	51.35	0.251477	0.999949	3.71318	105589	Inositol polyphosphate-4-phosphatase type I A OS=Rattus norvegicus OX=10116 GN=Inpp4a PE=1 SV=1	37.8719	1229.03	9059.4	12.0925	5398.75	1348.86	3397.68	262.856	4198.14	523.512	48151.7	6909.55
A7VJC2|ROA2_RAT;tr|B2GV69|B2GV69_RAT;tr|F1LM82|F1LM82_RAT;tr|F1LNF1|F1LNF1_RAT	2	2	83.02	0.251551	0.999949	1.22781	37477.8	Heterogeneous nuclear ribonucleoproteins A2/B1 OS=Rattus norvegicus OX=10116 GN=Hnrnpa2b1 PE=1 SV=1	17655.3	1483.85	125.45	3428.09	2707.67	4334.83	144.489	289.873	170.834	222.278	34799.2	882.589
Q63226|GRID2_RAT;tr|F1LXB6|F1LXB6_RAT	2	2	58.68	0.251621	0.999949	2.94162	113259	Glutamate receptor ionotropic, delta-2 OS=Rattus norvegicus OX=10116 GN=Grid2 PE=1 SV=2	169.826	1861.02	1297.79	139.737	4659.56	221.259	7930.64	311.376	311.769	5044.72	9986.01	975.605
tr|D3ZIM6|D3ZIM6_RAT	1	1	27.87	0.252007	0.999949	4.97289	10992	Ribonuclease K OS=Rattus norvegicus OX=10116 GN=Rnasek PE=1 SV=2	62213.2	78666.2	90673.3	31457.8	54187.9	44770	191883	5570.99	863227	179434	466350	93565.5
Q6IRK9|CBPQ_RAT	1	1	58.78	0.25242	0.999949	1.53224	52041.5	Carboxypeptidase Q OS=Rattus norvegicus OX=10116 GN=Cpq PE=1 SV=1	110046	165953	25878.8	2131.28	180302	377982	182292	269408	434718	166205	230104	38516.1
O35567|PUR9_RAT	13	11	484.02	0.252491	0.999949	1.52631	64208.5	Bifunctional purine biosynthesis protein ATIC OS=Rattus norvegicus OX=10116 GN=Atic PE=1 SV=2	289657	159090	296791	483120	261218	63933.2	219576	188702	340897	221765	25326.4	21751.4
A0JPJ7|OLA1_RAT	4	4	169.5	0.253087	0.999949	1.74358	44535.3	Obg-like ATPase 1 OS=Rattus norvegicus OX=10116 GN=Ola1 PE=2 SV=1	149413	50431.8	179580	34346.5	18362.7	23029.4	129245	144228	346178	97854.7	43586.9	32520.2
Q66HR2|MARE1_RAT	7	6	305.12	0.253486	0.999949	1.76483	30004.2	Microtubule-associated protein RP/EB family member 1 OS=Rattus norvegicus OX=10116 GN=Mapre1 PE=1 SV=3	297107	104459	279054	40112.6	528153	330891	128330	46629.8	1480.6	104687	276104	337911
P18886|CPT2_RAT;tr|G3V7N5|G3V7N5_RAT	1	1	30.36	0.25366	0.999949	2.01838	74110.4	Carnitine O-palmitoyltransferase 2, mitochondrial OS=Rattus norvegicus OX=10116 GN=Cpt2 PE=1 SV=1	283.228	1567.88	11478.5	52.959	57.2265	1145.21	4749.91	577.265	391.494	858.952	20989.9	1870.62
P28073|PSB6_RAT;tr|A0A0G2JSL0|A0A0G2JSL0_RAT	7	6	310.24	0.254123	0.999949	2.36575	25289.6	Proteasome subunit beta type-6 OS=Rattus norvegicus OX=10116 GN=Psmb6 PE=1 SV=3	407513	133173	117649	47283.5	576166	741090	114856	249355	131380	168675	11431	179371
tr|B2RYL4|B2RYL4_RAT	2	2	78.57	0.254654	0.999949	5.73474	50647.3	Armadillo repeat containing 6 OS=Rattus norvegicus OX=10116 GN=Armc6 PE=1 SV=1	80.2763	4901.43	1317.52	412.581	99.3025	39.0159	260.498	417.988	118.136	12362.1	25154	970.888
Q925D4|T176B_RAT	1	1	39.07	0.255008	0.999949	36.7487	28485.3	Transmembrane protein 176B OS=Rattus norvegicus OX=10116 GN=Tmem176b PE=1 SV=1	229.176	0.765018	6.16981	85.2332	421.501	0	130.807	2.33554	56.3814	40.2603	26736.8	332.023
D3ZBN0|H15_RAT	1	1	26.86	0.255039	0.999949	7.79028	22649.2	Histone H1.5 OS=Rattus norvegicus OX=10116 GN=H1-5 PE=1 SV=1	368.265	218.996	2145.68	55.4344	29.9444	79.8719	414.946	661.958	124.822	110.781	20854.1	411.14
tr|B0BNM7|B0BNM7_RAT;tr|G3V985|G3V985_RAT	2	2	49.98	0.255332	0.999949	1.5566	30744.3	Sco1 protein (Fragment) OS=Rattus norvegicus OX=10116 GN=Sco1 PE=2 SV=1	0	12409.8	12324.8	0	1724.61	339.076	21101.1	2561.93	52.1389	13646.5	3623.51	728.933
O88382|MAGI2_RAT;tr|A0A0G2JXR9|A0A0G2JXR9_RAT;tr|D3ZY03|D3ZY03_RAT	1	1	24.37	0.256081	0.999949	8.98514	141072	Membrane-associated guanylate kinase, WW and PDZ domain-containing protein 2 OS=Rattus norvegicus OX=10116 GN=Magi2 PE=1 SV=1	81.4436	34.0445	11.2736	729.222	0.0449133	2251	59.6518	243.215	196.426	49.8469	26878.8	489.115
tr|A0A140UHY1|A0A140UHY1_RAT;tr|Q5XI93|Q5XI93_RAT	1	1	39.03	0.256722	0.999949	4.62781	44237.9	Tetratricopeptide repeat domain 4 OS=Rattus norvegicus OX=10116 GN=Ttc4 PE=1 SV=1	1024.65	893.203	473.643	394.033	163.354	2545.37	413.193	4775.83	3270.51	758.168	15979.9	228.776
tr|B5DEZ8|B5DEZ8_RAT	3	1	96.41	0.257156	0.999949	14.0647	59417	Plexin domain containing 2 (Predicted) OS=Rattus norvegicus OX=10116 GN=Plxdc2 PE=1 SV=1	0	1448.35	5247.84	0	5229.41	11202.8	4066.74	94.0765	4167.07	293.867	307337	9334.59
tr|B2RZA8|B2RZA8_RAT	1	1	51.71	0.257182	0.999949	8.9532	50995.6	Slc30a6 protein OS=Rattus norvegicus OX=10116 GN=Slc30a6 PE=1 SV=1	4025.08	6973.86	35613.6	42638	2144.6	43587.7	68272.5	33900.2	1.06337e+06	7627.74	29155.5	6205.57
B1WC61|ACAD9_RAT	8	7	326.42	0.257192	0.999949	1.46206	68843.3	Complex I assembly factor ACAD9, mitochondrial OS=Rattus norvegicus OX=10116 GN=Acad9 PE=1 SV=1	48193.8	178844	137569	374205	136282	107059	108158	281146	25871.8	182142	40683.4	33760.3
tr|D3ZDM7|D3ZDM7_RAT	2	2	71.76	0.257489	0.999949	1.97841	37543.1	D-aspartate oxidase OS=Rattus norvegicus OX=10116 GN=Ddo PE=1 SV=1	529.667	8140.74	19891	131.63	62.4029	477.979	5315.89	1830.4	3082.65	4128.63	43226.1	251.868
tr|F1M4B6|F1M4B6_RAT	14	13	605.22	0.257912	0.999949	1.73237	106378	Similar to RIKEN cDNA 9330182L06 OS=Rattus norvegicus OX=10116 GN=RGD1563349 PE=3 SV=3	60068.4	73681.2	36007.3	94852.6	226425	269117	24543.2	36927.7	136781	70749.4	139002	30789.2
Q99MZ8|LASP1_RAT	9	5	343.74	0.258384	0.999949	1.41733	29970.4	LIM and SH3 domain protein 1 OS=Rattus norvegicus OX=10116 GN=Lasp1 PE=1 SV=1	89940.5	89877.5	63254.6	94572	147060	19865.3	127518	107553	51300.6	78782	200115	149875
D3ZCM3|ABCG4_RAT	1	1	50.56	0.259146	0.999949	2.55322	72491.5	ATP-binding cassette subfamily G member 4 OS=Rattus norvegicus OX=10116 GN=Abcg4 PE=2 SV=1	575.504	3051.57	12823.8	712.996	1827.9	100.665	5794.11	1582.06	714.136	2793.01	35550.5	2313.25
P97839|DLGP4_RAT;tr|G3V927|G3V927_RAT	3	2	125.17	0.259182	0.999949	1.42427	108035	Disks large-associated protein 4 OS=Rattus norvegicus OX=10116 GN=Dlgap4 PE=1 SV=1	917.581	4926.43	3987.63	4708.91	15306.3	17887.4	1101.85	1177.59	112.415	2919.03	22907.8	5296.1
Q04940|NEUG_RAT	3	3	216.02	0.259197	0.999949	1.57206	7496.31	Neurogranin OS=Rattus norvegicus OX=10116 GN=Nrgn PE=1 SV=1	888339	560145	446493	2.17328e+06	832941	1.90205e+06	454191	940570	1.48554e+06	484488	46985	915835
Q63692|CDC37_RAT;tr|A0A140TAG9|A0A140TAG9_RAT	5	2	272.92	0.259956	0.999949	13.7337	44510.4	Hsp90 co-chaperone Cdc37 OS=Rattus norvegicus OX=10116 GN=Cdc37 PE=1 SV=2	4575.2	532.911	58.1213	544.743	3794.11	900.745	565.808	1875.55	1103.25	443.783	128922	10000.5
Q561S0|NDUAA_RAT	14	14	800.36	0.260206	0.999949	1.41697	40493.1	NADH dehydrogenase [ubiquinone] 1 alpha subcomplex subunit 10, mitochondrial OS=Rattus norvegicus OX=10116 GN=Ndufa10 PE=1 SV=1	551160	2.23661e+06	569750	571453	1.1869e+06	2.75106e+06	1.18911e+06	125370	681594	2.89913e+06	111700	545032
Q9JHL4|DBNL_RAT	5	5	233.73	0.260416	0.999949	1.82374	48612.5	Drebrin-like protein OS=Rattus norvegicus OX=10116 GN=Dbnl PE=1 SV=1	46285.8	130219	40106.1	280406	263002	157133	60979.2	50887	168388	81693.3	22758.8	118190
Q63366|NXPH1_RAT;tr|F1LRY8|F1LRY8_RAT	1	1	35.03	0.260524	0.999949	2.42717	31017.2	Neurexophilin-1 OS=Rattus norvegicus OX=10116 GN=Nxph1 PE=1 SV=1	41.8145	3246.84	8186.67	153.831	16968.8	51.3317	8605.33	171.58	1858.97	1295.94	17518	40086.8
Q62634|VGLU1_RAT	18	10	928.99	0.261121	0.999949	3.163	61665.4	Vesicular glutamate transporter 1 OS=Rattus norvegicus OX=10116 GN=Slc17a7 PE=1 SV=1	408225	252740	333683	6.86724e+06	3.69327e+06	4.07297e+06	435134	517846	1.11272e+06	325707	59737	2.48976e+06
Q1H5H1|SELT_RAT;tr|A0A0G2K3B2|A0A0G2K3B2_RAT;tr|F8WFN1|F8WFN1_RAT	6	6	277.21	0.26158	0.999949	1.28035	22292.1	Thioredoxin reductase-like selenoprotein T OS=Rattus norvegicus OX=10116 GN=Selenot PE=1 SV=2	64599	244425	105265	53861.8	50384.3	592212	166258	238020	510223	270960	98403.7	138277
tr|D3ZJ01|D3ZJ01_RAT	7	6	287.87	0.261778	0.999949	1.53207	134650	RAB11-binding and LisH domain, coiled-coil and HEAT repeat-containing OS=Rattus norvegicus OX=10116 GN=Relch PE=1 SV=1	15943.5	11404.1	54485.1	2528.15	4391.04	11914.3	27307.7	5006.83	10333.9	31525.5	34592.8	45460.6
O54902|NRAM2_RAT;tr|A0A0G2JT15|A0A0G2JT15_RAT;tr|A0A0G2JTX4|A0A0G2JTX4_RAT;tr|A0A140TAD8|A0A140TAD8_RAT;tr|Q4QR92|Q4QR92_RAT	1	1	35.4	0.261824	0.999949	6.2766	62276.6	Natural resistance-associated macrophage protein 2 OS=Rattus norvegicus OX=10116 GN=Slc11a2 PE=1 SV=1	59.0585	2457.99	1419.98	54.2317	1392.95	927.726	2517.22	318.896	184.722	652.031	21674.6	14270
tr|A0A0G2JX52|A0A0G2JX52_RAT;tr|A0A0G2K7A6|A0A0G2K7A6_RAT;tr|G3V8F1|G3V8F1_RAT	6	4	230	0.261935	0.999949	1.06812	59020.6	Sodium-dependent proline transporter OS=Rattus norvegicus OX=10116 GN=Slc6a7 PE=1 SV=1	306061	305092	258940	545922	239084	248100	110445	438969	842040	340374	7231.24	42765.1
Q6P7A9|LYAG_RAT	12	2	558.33	0.262845	0.999949	1.87029	106207	Lysosomal alpha-glucosidase OS=Rattus norvegicus OX=10116 GN=Gaa PE=2 SV=1	94727.9	111911	94577.6	152410	40861.6	36300.6	138176	263474	328291	132393	28604.1	101792
Q63754|SYUB_RAT;tr|A0A0G2JSQ1|A0A0G2JSQ1_RAT	13	9	671.51	0.263125	0.999949	1.38589	14504.2	Beta-synuclein OS=Rattus norvegicus OX=10116 GN=Sncb PE=1 SV=1	1.22865e+06	701957	1.27774e+06	616611	2.5126e+06	1.00212e+06	725395	1.16294e+06	566436	552055	259859	2.02932e+06
tr|A0A0G2JV09|A0A0G2JV09_RAT	1	1	27.24	0.263284	0.999949	87.2371	60432.6	Synembryn-B OS=Rattus norvegicus OX=10116 GN=Ric8b PE=1 SV=1	23.6645	0	0	73.3341	16.4968	0	33.0371	407.027	0	0	9411.16	49.795
P14669|ANXA3_RAT	19	14	887.1	0.264238	0.999949	1.8664	36363.2	Annexin A3 OS=Rattus norvegicus OX=10116 GN=Anxa3 PE=1 SV=4	377619	330480	509516	2.18336e+06	1.58498e+06	2.12319e+06	206083	273011	1.09558e+06	237575	889168	1.1076e+06
tr|A0A0G2K5D7|A0A0G2K5D7_RAT;tr|Q4KLM7|Q4KLM7_RAT	1	1	47.15	0.265143	0.999949	5.62452	127600	Sperm antigen with calponin homology and coiled-coil domains 1 OS=Rattus norvegicus OX=10116 GN=Specc1 PE=1 SV=1	0	19.2087	3389.01	0	65.3446	0	361.052	0	2.29342	102.192	7802.47	11269.1
tr|D4AE56|D4AE56_RAT	3	3	110.21	0.265616	0.999949	1.73951	43452	Microsomal prostaglandin E synthase 2 OS=Rattus norvegicus OX=10116 GN=Ptges2 PE=1 SV=1	5669.52	12464.5	4598.07	195.596	9567.32	15.8373	8207.68	4747.07	1998.53	23311.6	16901.6	1386.24
Q9P290|S22AH_RAT	4	4	142.73	0.265623	0.999949	1.38085	55801.4	Solute carrier family 22 member 17 OS=Rattus norvegicus OX=10116 GN=Slc22a17 PE=2 SV=2	127870	287451	433552	976670	418093	411800	244027	363987	890593	349485	16380.7	58577.8
P62282|RS11_RAT;tr|Q6PDV9|Q6PDV9_RAT	3	2	90.68	0.26578	0.999949	4.0149	18430.7	40S ribosomal protein S11 OS=Rattus norvegicus OX=10116 GN=Rps11 PE=1 SV=3	572.206	6850.14	32086	43.5315	1615.77	197.347	17930.9	7426.22	44.9454	9311.36	124064	7299.05
O88923|AGRL2_RAT;tr|D3ZBE9|D3ZBE9_RAT;tr|D3ZNG0|D3ZNG0_RAT;tr|F1M7T0|F1M7T0_RAT	1	1	36.06	0.265788	0.999949	65.2259	166728	Adhesion G protein-coupled receptor L2 OS=Rattus norvegicus OX=10116 GN=Adgrl2 PE=1 SV=2	66.9394	159.743	44.8859	164.658	26.0604	148.223	30.3334	3615.55	173.588	52.0514	35903.9	45.6464
tr|D3ZZB0|D3ZZB0_RAT	5	4	137.19	0.265984	0.999949	1.83094	173964	Disco-interacting protein 2 homolog C OS=Rattus norvegicus OX=10116 GN=Dip2c PE=1 SV=2	1530.41	1422.13	13023	61.0043	468.724	335.502	4449.76	462.806	615.064	1485.46	17780.7	6040.6
tr|D4A820|D4A820_RAT	1	1	49.17	0.265992	0.999949	15.0164	55548.4	Cytochrome P450 OS=Rattus norvegicus OX=10116 GN=Cyp2s1 PE=3 SV=1	0	0	0	0	1.43515	1999.56	0	50.5288	0	25.9178	29894.8	76.3988
tr|Q5XIE4|Q5XIE4_RAT	1	1	49.41	0.266601	0.999949	1.49893	29874.3	Ring finger and CHY zinc finger domain containing 1, isoform CRA_b OS=Rattus norvegicus OX=10116 GN=Rchy1 PE=1 SV=1	9.13848	36.6736	480.565	40.756	3692.11	8.8597	321.494	0.37794	0	0.294565	0.000149203	6075.4
tr|D4A5K6|D4A5K6_RAT	6	5	172.24	0.266985	0.999949	1.62631	54847.8	CAAX prenyl protease OS=Rattus norvegicus OX=10116 GN=Zmpste24 PE=1 SV=1	370855	479059	406145	324250	122216	93468.9	265189	697194	709605	519015	113527	616305
P01015|ANGT_RAT	2	2	87.04	0.26719	0.999949	2.79883	51981.6	Angiotensinogen OS=Rattus norvegicus OX=10116 GN=Agt PE=1 SV=1	133296	186764	194408	22096.3	15943.2	3298.9	149086	363363	454053	500929	5357.17	82816.5
P62912|RL32_RAT;tr|D4A412|D4A412_RAT	2	2	157.94	0.267465	0.999949	1.30115	15859.8	60S ribosomal protein L32 OS=Rattus norvegicus OX=10116 GN=Rpl32 PE=1 SV=2	86935.6	139394	142539	51734.5	170474	91854.6	32645.5	203285	85603.9	115033	75818	12480.3
tr|M0RBL8|M0RBL8_RAT;tr|M0RDJ7|M0RDJ7_RAT	2	2	80.04	0.267543	0.999949	1.53294	22336.3	Transcription elongation factor A (SII)-like 6 OS=Rattus norvegicus OX=10116 GN=Tceal6 PE=1 SV=1	47301.1	19333.7	88153.2	78214.2	20441.8	26974.8	14332.7	38245.5	49231.5	16648.6	2841.78	61628.4
Q6PDU4|LERL1_RAT;tr|A0A140TAI9|A0A140TAI9_RAT	2	2	126.6	0.267573	0.999949	3.95928	14400.1	Leptin receptor overlapping transcript-like 1 OS=Rattus norvegicus OX=10116 GN=Leprotl1 PE=1 SV=1	62299.9	7234.93	6717.9	1461.89	264149	30019.8	12052.8	5565.51	1424.21	4339.63	1362.09	69182.7
Q793F9|VPS4A_RAT;tr|F7F1Y3|F7F1Y3_RAT;tr|Q4KLL7|Q4KLL7_RAT;tr|Q6IRG3|Q6IRG3_RAT	1	1	20.31	0.268382	0.999949	113.175	48906.9	Vacuolar protein sorting-associated protein 4A OS=Rattus norvegicus OX=10116 GN=Vps4a PE=1 SV=1	277.961	79.2846	371.977	1.46676	55.103	0	46.9364	512.075	45.2633	76.3487	88241.4	9.76986
P18508|GBRG2_RAT;tr|Q6PW52|Q6PW52_RAT	5	2	210.98	0.26856	0.999949	1.24925	54077.2	Gamma-aminobutyric acid receptor subunit gamma-2 OS=Rattus norvegicus OX=10116 GN=Gabrg2 PE=1 SV=1	47183.3	186686	110141	37461.7	61399.4	8099.87	2815.03	2304.44	4744.9	470952	28018.7	54541.1
P02650|APOE_RAT;tr|A0A0G2K151|A0A0G2K151_RAT;tr|Q65ZS7|Q65ZS7_RAT;tr|Q6PAH0|Q6PAH0_RAT	19	16	933.5	0.268819	0.999949	1.38272	35753.5	Apolipoprotein E OS=Rattus norvegicus OX=10116 GN=Apoe PE=1 SV=2	2.00194e+06	1.44402e+06	1.08703e+06	2.46189e+06	2.32963e+06	5.2925e+06	1.48679e+06	2.39802e+06	3.99806e+06	2.01813e+06	300224	369962
Q63598|PLST_RAT;tr|F1LPK7|F1LPK7_RAT;tr|Q562B2|Q562B2_RAT	2	1	55.52	0.269308	0.999949	3.30303	70680	Plastin-3 OS=Rattus norvegicus OX=10116 GN=Pls3 PE=1 SV=2	1446.77	614.378	1069.44	1163.65	24908.4	518.186	11057.9	1231.16	660.974	6956.17	76417	1845.37
tr|F1LSX1|F1LSX1_RAT	4	3	103.26	0.269543	0.999949	6.92506	249054	Similar to CG14967-PA OS=Rattus norvegicus OX=10116 GN=RGD1307929 PE=4 SV=2	38.1753	451.427	1319.23	761.62	164.267	155.2	575.385	305.199	417.511	276.077	18017.3	421.376
Q920L6|ELOV6_RAT	1	1	63.51	0.269968	0.999949	2.12739	31624.2	Elongation of very long chain fatty acids protein 6 OS=Rattus norvegicus OX=10116 GN=Elovl6 PE=1 SV=1	3565.88	741.482	3219.12	81.2247	16207.7	241.038	77.2108	0	1622.57	217.889	338.203	9052.07
Q63065|PDK1_RAT;tr|F1MA54|F1MA54_RAT;tr|Q5FVT5|Q5FVT5_RAT	1	1	32.71	0.270168	0.999949	3.70881	49081.1	[Pyruvate dehydrogenase (acetyl-transferring)] kinase isozyme 1, mitochondrial OS=Rattus norvegicus OX=10116 GN=Pdk1 PE=1 SV=1	76530.4	194317	61684.3	16271.7	125365	1.5771e+06	20562.2	309624	59402	129744	28120.8	5627.96
Q9WV78|PLVAP_RAT;tr|A0A0G2JZ75|A0A0G2JZ75_RAT	1	1	21	0.270739	0.999949	2.76945	50033.4	Plasmalemma vesicle-associated protein OS=Rattus norvegicus OX=10116 GN=Plvap PE=1 SV=1	55071.6	19987.2	106358	215002	3016.4	12228.2	9865.97	31791.5	77317.2	24817.6	116.454	4735.87
Q9QYJ4|ABCB9_RAT;tr|A0A0A0MY39|A0A0A0MY39_RAT	7	4	302.86	0.271249	0.999949	1.83655	84033.2	ABC-type oligopeptide transporter ABCB9 OS=Rattus norvegicus OX=10116 GN=Abcb9 PE=1 SV=1	120035	65214	40546.6	3953.67	15491.4	1926.24	8385.55	83983.5	223522	50077	67437.8	20527.9
P55161|NCKP1_RAT	26	21	1205.58	0.272207	0.999949	1.27622	128865	Nck-associated protein 1 OS=Rattus norvegicus OX=10116 GN=Nckap1 PE=2 SV=1	716126	326918	489015	337414	380138	522892	541424	581935	427748	278306	73561.1	269467
tr|B4F772|B4F772_RAT;tr|F7F2F3|F7F2F3_RAT	16	10	603.42	0.27235	0.999949	1.69215	94220.9	Heat shock 70kDa protein 4-like (Predicted), isoform CRA_b OS=Rattus norvegicus OX=10116 GN=Hspa4l PE=1 SV=1	58823.8	58458.9	131888	39139	46144.3	8878.43	100954	102825	189169	88921.1	83105.5	15997
tr|D4A3D4|D4A3D4_RAT	6	6	323.84	0.272931	0.999949	1.6403	46229.3	Abhydrolase domain containing 3 (Predicted) OS=Rattus norvegicus OX=10116 GN=Abhd3 PE=3 SV=2	120043	71192.9	145707	733682	518318	410183	93726.1	88744.3	80019.9	93547.4	748497	114223
Q9Z2T2|KCNK1_RAT	1	1	67.01	0.27305	0.999949	51.5259	38228.2	Potassium channel subfamily K member 1 OS=Rattus norvegicus OX=10116 GN=Kcnk1 PE=1 SV=1	1549.96	711.75	0	312.86	0	0	724.427	108.976	130767	962.662	93.388	0
P61314|RL15_RAT	6	6	204.71	0.273539	0.999949	1.52121	24146.1	60S ribosomal protein L15 OS=Rattus norvegicus OX=10116 GN=Rpl15 PE=1 SV=2	24115.9	191846	240274	46399.2	20156.8	6359.92	147592	202841	253693	140903	20615	39307.7
P0C0K7|EPHB6_RAT	4	4	190.23	0.27383	0.999949	1.79195	110313	Ephrin type-B receptor 6 OS=Rattus norvegicus OX=10116 GN=Ephb6 PE=3 SV=3	13078.9	35012.6	63881.7	32518.5	83393.6	168420	44562	6713.6	75798.6	29230.1	6757.99	58096.9
tr|F1LRV6|F1LRV6_RAT	6	5	288.58	0.273985	0.999949	1.31264	37457.9	GMP reductase OS=Rattus norvegicus OX=10116 GN=Gmpr PE=3 SV=1	4465.9	38878.6	19714.3	27174.1	44308.4	64251.2	32395.9	33755.4	33324.8	34169.6	81718.8	45578.4
Q9ES73|MAGD1_RAT	1	1	71.81	0.274025	0.999949	12.9573	85798.2	Melanoma-associated antigen D1 OS=Rattus norvegicus OX=10116 GN=Maged1 PE=1 SV=3	13.4928	1.70418	765.926	0	0	0	29.9967	22.305	0	0.0257103	6812.15	3256.8
tr|Q4QQU9|Q4QQU9_RAT	3	1	165.02	0.274159	0.999949	2.38754	37909.8	Osteoclastogenesis-associated transmembrane protein 1 OS=Rattus norvegicus OX=10116 GN=Ostm1 PE=1 SV=1	16897	10467.3	26253	11264.3	27595.1	30378	13721.7	15248.2	74388.7	9930.78	117490	62541.8
tr|D3ZV91|D3ZV91_RAT	1	1	58.56	0.274304	0.999949	2.13734	37914.3	Trans-3-hydroxy-L-proline dehydratase OS=Rattus norvegicus OX=10116 GN=L3hypdh PE=1 SV=1	7234.29	272.043	162.318	176.964	11618.9	495.66	1942.18	2867.53	1076.2	361.533	31761.6	4652.69
tr|B2RYX0|B2RYX0_RAT;tr|M0R9L0|M0R9L0_RAT	1	1	46.1	0.274602	0.999949	2.89506	23383.9	Naca protein OS=Rattus norvegicus OX=10116 GN=Naca PE=1 SV=1	36655.6	33726.5	4555.38	7111.57	1519.72	171903	1558.2	8795.72	3087.94	46075.1	0	28727
P62853|RS25_RAT;tr|A0A0H2UHU0|A0A0H2UHU0_RAT;tr|F1M6F4|F1M6F4_RAT	3	1	111.7	0.275001	0.999949	1.80567	13742.1	40S ribosomal protein S25 OS=Rattus norvegicus OX=10116 GN=Rps25 PE=2 SV=1	7884.88	24560.7	31413.2	27894.2	85101.9	79910.7	2852.89	22623.9	36547.1	24413.4	46485.1	9276.96
Q498E0|TXD12_RAT;tr|B0BN97|B0BN97_RAT	7	7	385.02	0.275099	0.999949	1.46472	19018.6	Thioredoxin domain-containing protein 12 OS=Rattus norvegicus OX=10116 GN=Txndc12 PE=2 SV=2	1.02025e+06	1.17378e+06	1.77872e+06	337624	1.69471e+06	252595	1.57803e+06	1.20291e+06	2.11982e+06	1.17423e+06	460444	2.63034e+06
Q8VHV7|HNRH1_RAT;tr|A0A0G2JTG7|A0A0G2JTG7_RAT;tr|G3V9Q3|G3V9Q3_RAT	2	1	80.97	0.275465	0.999949	36335.6	49188.3	Heterogeneous nuclear ribonucleoprotein H OS=Rattus norvegicus OX=10116 GN=Hnrnph1 PE=1 SV=2	0.28334	0	0	0	0	0	0	0	2.34598	0	10293	0
tr|D3ZF13|D3ZF13_RAT	5	4	300.83	0.275608	0.999949	1.95195	17514.5	Acyl carrier protein OS=Rattus norvegicus OX=10116 GN=Ndufab1 PE=1 SV=1	690687	1.55894e+06	655168	194950	43343.4	15060.6	953893	1.15536e+06	2.05274e+06	1.70251e+06	58143.6	241897
P20650|PPM1A_RAT;tr|A0A0H2UHE5|A0A0H2UHE5_RAT	4	4	159.22	0.276004	0.999949	1.50938	42416.7	Protein phosphatase 1A OS=Rattus norvegicus OX=10116 GN=Ppm1a PE=1 SV=1	190798	175591	346495	375520	276403	47452.4	307560	114222	55735.9	111765	21199.7	325174
P81799|NAGK_RAT	1	1	54.18	0.276062	0.999949	98.122	37196.3	N-acetyl-D-glucosamine kinase OS=Rattus norvegicus OX=10116 GN=Nagk PE=1 SV=4	0	0	0	0	0	50.6679	0	0	0	3.39713	4850.25	117.986
tr|Q75T81|Q75T81_RAT	7	6	340.52	0.276815	0.999949	1.4431	57672	Asc-type amino acid transporter 1 OS=Rattus norvegicus OX=10116 GN=Slc7a10 PE=1 SV=1	74791.4	25485.5	64095.6	163357	208460	93356.9	56918.7	72787.7	3796.22	152494	10421.2	139829
Q5XIE8|ITM2B_RAT	5	4	222.49	0.277238	0.999949	1.38879	30313.9	Integral membrane protein 2B OS=Rattus norvegicus OX=10116 GN=Itm2b PE=1 SV=1	78730.6	85791.7	17985.2	50972.4	3211.92	11.3214	38164.6	80272.6	69172.1	52982.2	82404.5	5735.21
tr|G3V774|G3V774_RAT;tr|Q9Z1X8|Q9Z1X8_RAT	2	2	80.85	0.277322	0.999949	1.30663	33672.9	F-box only protein 2 OS=Rattus norvegicus OX=10116 GN=Fbxo2 PE=4 SV=1	114167	80577.9	67180.2	150080	178492	208964	55891.6	82149.6	50614.4	92615.7	89618.8	240958
P55053|FABP5_RAT	6	4	363.27	0.277815	0.999949	2.04435	15059.4	Fatty acid-binding protein 5 OS=Rattus norvegicus OX=10116 GN=Fabp5 PE=1 SV=3	98815.4	176924	589601	878466	1.42083e+06	131364	177296	131358	904995	228488	130224	39884.2
tr|D4AEP0|D4AEP0_RAT	1	1	29.44	0.278006	0.999949	1.04462	50085.2	Adenylosuccinate synthetase isozyme 2 OS=Rattus norvegicus OX=10116 GN=Adss PE=1 SV=1	0	5338.34	16206.9	36.8814	9346.1	1066.71	13450.9	1062.73	1394.48	3351.48	2520.37	11642.7
tr|D3ZD09|D3ZD09_RAT	7	6	525.43	0.278546	0.999949	1.16844	10071.4	Cytochrome c oxidase subunit OS=Rattus norvegicus OX=10116 GN=Cox6b1 PE=1 SV=1	4.00732e+06	5.51167e+06	2.10162e+06	1.19569e+06	2.01558e+06	3.79095e+06	656753	5.8937e+06	2.38154e+06	6.23626e+06	34082.1	735882
O88775|EMB_RAT;tr|A0A0G2JU92|A0A0G2JU92_RAT;tr|A0A0G2JWP4|A0A0G2JWP4_RAT	3	3	200.75	0.279222	0.999949	3.49521	37005.2	Embigin OS=Rattus norvegicus OX=10116 GN=Emb PE=1 SV=1	17004.1	19528.2	37647.6	8798.41	7579.78	37611.9	19816.3	36752.4	334290	27920.4	15069.3	14132.4
tr|D4ACC3|D4ACC3_RAT	2	2	42.83	0.279382	0.999949	1.91484	19560.8	RCG61984, isoform CRA_a OS=Rattus norvegicus OX=10116 GN=Tmem229b PE=3 SV=1	31976.3	18144.8	159154	151393	89462.8	91003.8	34471.2	34388.6	77550.4	39773.5	52241.8	44175
Q07014|LYN_RAT	3	1	80.85	0.279733	0.999949	1.32901	58660.2	Tyrosine-protein kinase Lyn OS=Rattus norvegicus OX=10116 GN=Lyn PE=1 SV=3	366.106	3180.79	19689.2	286.455	3017.97	793.314	8016.28	4861.59	360.887	4315.59	12818	5954.66
P63324|RS12_RAT;tr|D3ZG05|D3ZG05_RAT;tr|D3ZHB3|D3ZHB3_RAT;tr|Q6PDW1|Q6PDW1_RAT	1	1	46.26	0.27974	0.999949	9.5667	14524.9	40S ribosomal protein S12 OS=Rattus norvegicus OX=10116 GN=Rps12 PE=1 SV=2	39.5311	1284.97	4697.42	23.524	707.302	1185.5	1991.66	45.7626	1085.22	846.105	65236.8	6737.17
P85968|6PGD_RAT	6	6	235.88	0.28011	0.999949	1.47908	53236.3	6-phosphogluconate dehydrogenase, decarboxylating OS=Rattus norvegicus OX=10116 GN=Pgd PE=1 SV=1	311031	189752	113344	157259	169199	337492	258719	340275	658008	277725	111362	244291
tr|B2GUV5|B2GUV5_RAT	5	3	356.13	0.280123	0.999949	1.51265	13710.4	V-type proton ATPase subunit G OS=Rattus norvegicus OX=10116 GN=Atp6v1g1 PE=1 SV=1	2.64963e+06	683163	857231	3.68684e+06	1.16211e+06	627911	704908	1.07276e+06	3.21664e+06	828407	90694.7	477288
tr|Q45QK6|Q45QK6_RAT	8	7	521.34	0.280269	0.999949	1.20486	5667.61	Guanine nucleotide-binding protein subunit gamma (Fragment) OS=Rattus norvegicus OX=10116 GN=Gng2 PE=2 SV=1	6.76784e+06	3.45008e+06	5.70281e+06	1.48596e+06	625679	1.02691e+06	4.60893e+06	3.67767e+06	5.74759e+06	3.24024e+06	3.74615e+06	1.9432e+06
Q497B0|NIT2_RAT	4	2	169.17	0.280349	0.999949	1.11116	30701	Omega-amidase NIT2 OS=Rattus norvegicus OX=10116 GN=Nit2 PE=1 SV=1	1478.25	9580.77	1952.68	15176.4	65088.5	1116.86	2416.83	0.000277295	0	3392.41	54986.8	44090
P14408|FUMH_RAT	11	7	489.67	0.280691	0.999949	1.73894	54464.9	Fumarate hydratase, mitochondrial OS=Rattus norvegicus OX=10116 GN=Fh PE=1 SV=2	96358.3	286180	145461	739212	148886	503557	281674	214384	336361	172799	32661.7	66042.6
tr|A0A0G2JU49|A0A0G2JU49_RAT;tr|Q4KLN2|Q4KLN2_RAT	1	1	31	0.281314	0.999949	1.99595	51925.7	Metaxin 1 OS=Rattus norvegicus OX=10116 GN=Mtx1 PE=1 SV=1	0	12024.2	12323.1	153.709	8028.06	90.2953	36724	1732.62	89.5474	16056.6	5989.3	4514.62
P38406|GNAL_RAT;tr|A0A0G2K526|A0A0G2K526_RAT;tr|G3V8E8|G3V8E8_RAT	9	1	426.65	0.282225	0.999949	1.4794	44248.4	Guanine nucleotide-binding protein G(olf) subunit alpha OS=Rattus norvegicus OX=10116 GN=Gnal PE=2 SV=2	13911.2	27331.2	46501.9	35080.6	2090.67	27147	9754.87	15508.7	57933.8	17917.1	700.576	971.677
Q66H71|CPPED_RAT	1	1	36.62	0.282251	0.999949	12.6687	35260.7	Serine/threonine-protein phosphatase CPPED1 OS=Rattus norvegicus OX=10116 GN=Cpped1 PE=1 SV=1	739.696	2.28253	33.4048	101.45	0	0	30.8761	0	520.606	221.207	10312.6	23.0457
P23562|B3AT_RAT;tr|F8WFT7|F8WFT7_RAT;tr|Q5U329|Q5U329_RAT;tr|Q91ZE7|Q91ZE7_RAT	3	2	117.85	0.282863	0.999949	2.30105	103173	Band 3 anion transport protein OS=Rattus norvegicus OX=10116 GN=Slc4a1 PE=1 SV=3	13668.3	35000.6	51293	50830.7	13371.2	188705	5172.36	23599.9	41111.5	30411.4	33030.7	20025
tr|F7EN52|F7EN52_RAT	16	15	759.27	0.283118	0.999949	1.66626	56700	Cyp46a1 protein OS=Rattus norvegicus OX=10116 GN=Cyp46a1 PE=2 SV=2	228269	323127	263626	1.74932e+06	682469	1.07383e+06	294490	193487	1.08337e+06	229418	65659.4	726598
tr|A0A0G2K7Q7|A0A0G2K7Q7_RAT	2	2	81.99	0.2834	0.999949	1.49674	113162	Insulin-degrading enzyme OS=Rattus norvegicus OX=10116 GN=Ide PE=1 SV=1	1533.82	7368.08	6340.38	537.603	13530.1	199.081	8816.96	2221.88	1471.05	8545.11	18541.6	4570.81
tr|A0JN30|A0JN30_RAT	6	6	379.3	0.28345	0.999949	1.24592	20709.3	Canopy 2 homolog (Zebrafish) OS=Rattus norvegicus OX=10116 GN=Cnpy2 PE=1 SV=1	694254	602299	608887	1.07822e+06	943007	1.34258e+06	505778	803041	1.50558e+06	519475	197700	697613
P09951|SYN1_RAT	66	54	4158.75	0.283523	0.999949	1.42195	73988.3	Synapsin-1 OS=Rattus norvegicus OX=10116 GN=Syn1 PE=1 SV=3	1.12346e+06	481443	1.36927e+06	1.20334e+06	3.8635e+06	2.62771e+06	676144	942187	1.93068e+06	388699	95848.8	3.46931e+06
Q9Z1T4|CNKR2_RAT	1	1	29.64	0.283813	0.999949	2.64255	117390	Connector enhancer of kinase suppressor of ras 2 OS=Rattus norvegicus OX=10116 GN=Cnksr2 PE=1 SV=1	1134.12	33.9413	152.188	39.6025	106.95	507.911	68.7747	71.7325	0	57.7941	5019.96	0
tr|F1LV44|F1LV44_RAT	6	2	251.36	0.284059	0.999949	3.62478	283736	Teneurin transmembrane protein 3 OS=Rattus norvegicus OX=10116 GN=Tenm3 PE=1 SV=3	1367.11	1521.76	2038.99	1191.42	723.058	529.595	3037.83	1604.5	529.822	1949.32	18756.8	843.295
Q63507|RL14_RAT;tr|B5DEM5|B5DEM5_RAT;tr|D3ZHE6|D3ZHE6_RAT;tr|F1LSW7|F1LSW7_RAT;tr|Q6TUH8|Q6TUH8_RAT	1	1	41.72	0.284114	0.999949	1.31131	23338.8	60S ribosomal protein L14 OS=Rattus norvegicus OX=10116 GN=Rpl14 PE=1 SV=3	84698.5	305903	145125	102884	224587	435664	280567	53986.9	46117.6	394699	7065.03	208072
tr|D3ZZA8|D3ZZA8_RAT	1	1	32.42	0.284214	0.999949	1.18915	118867	SEC24 homolog A, COPII coat complex component OS=Rattus norvegicus OX=10116 GN=Sec24a PE=1 SV=1	16.9208	1109.37	8239.95	15.6415	4168.39	243.797	5342.1	564.687	343.701	874.83	1293.99	7983.87
Q9EPH8|PABP1_RAT;tr|A0A0G2JZS2|A0A0G2JZS2_RAT	3	2	88.07	0.28427	0.999949	64.5983	70700.8	Polyadenylate-binding protein 1 OS=Rattus norvegicus OX=10116 GN=Pabpc1 PE=1 SV=1	178.856	2189.49	7771.34	525.775	128.082	342.031	5914.06	483.702	188.068	2725.69	709319	708.307
Q64680|CP2D4_RAT	6	6	290.76	0.284379	0.999949	30.7628	56683.9	Cytochrome P450 2D4 OS=Rattus norvegicus OX=10116 GN=Cyp2d4 PE=2 SV=1	10593	4568.23	790.994	2842.91	16883.2	2595.74	3434.3	2526.11	47395.3	1887.77	1.1131e+06	9074.74
Q4TU93|MRC2_RAT;tr|F1LMA7|F1LMA7_RAT	1	1	35.36	0.28465	0.999949	1.24155	167021	C-type mannose receptor 2 OS=Rattus norvegicus OX=10116 GN=Mrc2 PE=1 SV=1	11.4843	1113.86	5820.69	0.329521	24568	10.4955	5325.16	171.986	29.9911	6621.51	2015.56	24975.7
tr|B0BN20|B0BN20_RAT;tr|Q5RJZ3|Q5RJZ3_RAT	2	2	90.5	0.284661	0.999949	1.28746	27535.2	Tetraspanin OS=Rattus norvegicus OX=10116 GN=Tspan6 PE=1 SV=1	341093	240475	238576	141155	332582	297337	211732	164595	306246	292900	37122.1	223337
tr|D3ZWM3|D3ZWM3_RAT	1	1	48.39	0.285263	0.999949	1.12281	96157.1	G protein-coupled receptor 155 OS=Rattus norvegicus OX=10116 GN=Gpr155 PE=1 SV=1	27074.1	3107.3	20815.3	12197.5	4600.3	3302.75	5442.2	3853.37	5674.47	64034.4	0	824.509
Q5U318|PEA15_RAT	7	5	328.7	0.285391	0.999949	1.88621	15040.1	Astrocytic phosphoprotein PEA-15 OS=Rattus norvegicus OX=10116 GN=Pea15 PE=1 SV=1	32419.1	31336.6	80466.7	13675.2	112862	7305.13	1839.74	51011.8	25141.7	51565.4	9164.65	8696.41
Q6MGB5|DHB8_RAT;tr|A0A0G2K6P1|A0A0G2K6P1_RAT	1	1	57.6	0.285793	0.999949	1.06567	26790.6	(3R)-3-hydroxyacyl-CoA dehydrogenase OS=Rattus norvegicus OX=10116 GN=Hsd17b8 PE=1 SV=1	6375.26	5372.41	11863.8	1749.28	21749.4	74.1466	20243.3	4.8751	0	2418.12	634.405	20975.8
F1LN46|CPT1C_RAT	9	7	372.58	0.285934	0.999949	1.64244	90169.9	Carnitine O-palmitoyltransferase 1, brain isoform OS=Rattus norvegicus OX=10116 GN=Cpt1c PE=1 SV=1	164181	59333.7	48724.5	138517	239919	304279	112639	69312.1	64072.7	42434.8	87850.8	205114
tr|D4A7F2|D4A7F2_RAT	1	1	27.18	0.286296	0.999949	22.2783	11969.7	Myc-binding protein OS=Rattus norvegicus OX=10116 GN=Mycbp PE=1 SV=1	50.4426	26.2569	94.5508	108.71	38.1369	2608.32	31.0351	1039.54	2359.79	25.0281	61598.7	141.513
P21588|5NTD_RAT;tr|Q66HL0|Q66HL0_RAT	2	2	69.33	0.2865	0.999949	5.35943	63968.8	5'-nucleotidase OS=Rattus norvegicus OX=10116 GN=Nt5e PE=1 SV=1	582.273	276.938	1255.16	4682.27	9452.77	0	3701.04	38.2724	3752.06	990.686	46988.5	31617.1
O08835|SYT11_RAT	5	1	268.2	0.286567	0.999949	1.34083	48267.9	Synaptotagmin-11 OS=Rattus norvegicus OX=10116 GN=Syt11 PE=1 SV=2	388055	565419	644272	314228	58514.6	15040.8	403477	700394	679888	452950	290312	135235
A2RUW1|TOLIP_RAT	4	3	122.16	0.286722	0.999949	1.04302	30314.8	Toll-interacting protein OS=Rattus norvegicus OX=10116 GN=Tollip PE=1 SV=1	262.955	4712.46	29737.4	11.2441	56459.9	5.18958	37330.4	588.608	4456.65	6040.36	884.244	38128
Q6AYQ1|GOGA7_RAT	3	3	125.74	0.286877	0.999949	2.10415	15778	Golgin subfamily A member 7 OS=Rattus norvegicus OX=10116 GN=Golga7 PE=2 SV=1	14288.4	13362	1663.24	11544.2	1216.98	194.759	3110.97	5431.88	4500.77	13985.6	57817.7	4094.6
Q0VGK4|GDPD1_RAT	14	12	625.74	0.287007	0.999949	1.58215	35810.8	Lysophospholipase D GDPD1 OS=Rattus norvegicus OX=10116 GN=Gdpd1 PE=2 SV=1	1.0564e+06	1.15179e+06	3.08237e+06	1.07113e+06	1.44846e+06	4.65453e+06	1.1661e+06	1.6104e+06	1.96579e+06	993479	110768	2.03176e+06
tr|Q63571|Q63571_RAT	2	2	60.13	0.287363	0.999949	2.36935	19978.1	Rat growth and transformation-dependent (Fragment) OS=Rattus norvegicus OX=10116 PE=2 SV=1	164695	27055.7	8396.58	57704.9	15883.8	93014.2	42058.3	15712.7	23282.8	51883.2	5303.47	16549
tr|D3ZC15|D3ZC15_RAT	1	1	46.84	0.28774	0.999949	4.36306	148359	Capping protein regulator and myosin 1 linker 2 OS=Rattus norvegicus OX=10116 GN=Carmil2 PE=1 SV=2	93.7278	1558.45	1523.03	15.3975	294.579	0.198914	1455.16	338.878	42.3215	414.766	12837.9	117.862
D4AEC2|CAMP2_RAT;tr|A0A5H1ZRV8|A0A5H1ZRV8_RAT	2	2	81.25	0.287937	0.999949	1.49899	165611	Calmodulin-regulated spectrin-associated protein 2 OS=Rattus norvegicus OX=10116 GN=Camsap2 PE=1 SV=1	2473.37	8.73928	247.605	4905.75	1102.54	76.9727	7.19766	0	41.2312	13.4563	12479.2	672.465
tr|D4ABT9|D4ABT9_RAT	1	1	25.11	0.28818	0.999949	34.0969	23743.3	Sarcospan OS=Rattus norvegicus OX=10116 GN=Sspn PE=4 SV=1	0	71.0509	632.021	19.5857	188.828	526.421	206.715	174.36	30.5877	23.1476	46919.4	1673.91
tr|M0R5H1|M0R5H1_RAT	2	2	55.34	0.288391	0.999949	1.66555	214656	Enhancer trap locus 4 OS=Rattus norvegicus OX=10116 GN=Etl4 PE=1 SV=2	12.04	25705.7	24233.9	10.7969	7051.67	168.373	26010	133.044	480.089	11013.8	29293.3	28310.3
Q5EGY4|YKT6_RAT	4	3	163.91	0.288398	0.999949	2.28795	22369.5	Synaptobrevin homolog YKT6 OS=Rattus norvegicus OX=10116 GN=Ykt6 PE=1 SV=1	106042	98195.6	155052	16460.3	19917.2	10290	125433	154204	469437	95444.3	74700.1	9594.08
tr|F1M110|F1M110_RAT;tr|Q700Q7|Q700Q7_RAT	1	1	28.13	0.288481	0.999949	2.36713	60471.3	Glycylpeptide N-tetradecanoyltransferase OS=Rattus norvegicus OX=10116 GN=Nmt2 PE=1 SV=3	636.251	2092.66	17527.7	320.233	7776.67	212.717	7082.08	2960.48	520.731	1138.05	30950.8	24967.7
tr|D4A1C1|D4A1C1_RAT	1	1	32.08	0.288865	0.999949	1891.91	26293.6	RAB, member of RAS oncogene family-like 3 OS=Rattus norvegicus OX=10116 GN=Rabl3 PE=1 SV=1	115.4	48.7839	39.2308	26.9024	8.58238	28.8285	1165.55	200.6	87.4336	62.7619	505002	0.177837
tr|A0A0G2JWC7|A0A0G2JWC7_RAT;tr|Q5XI19|Q5XI19_RAT	5	5	220.1	0.289193	0.999949	1.3353	79623.7	FERM domain-containing kindlin 2 OS=Rattus norvegicus OX=10116 GN=Fermt2 PE=1 SV=1	2180.89	6600.09	34284.8	2479.59	74395.1	1791.81	19336.9	3622.94	33619.5	5799.53	40061.7	60109
Q5HZA9|T126A_RAT	2	2	58.3	0.289338	0.999949	1.42775	21657.3	Transmembrane protein 126A OS=Rattus norvegicus OX=10116 GN=Tmem126a PE=2 SV=1	13.1136	25006.7	36908.3	46.0324	33984.3	47.0442	46487.7	2313.21	95.6107	22593.4	21462.1	44120
Q8CGU4|AGAP2_RAT	1	1	35.18	0.289617	0.999949	4.97021	124437	Arf-GAP with GTPase, ANK repeat and PH domain-containing protein 2 OS=Rattus norvegicus OX=10116 GN=Agap2 PE=1 SV=1	27246.5	11715.3	320951	4292.99	3965.38	252739	33413.2	5781.68	6425.07	0	28408.4	50898.1
tr|B0BNB1|B0BNB1_RAT	1	1	52.75	0.28971	0.999949	342.787	21037	COMM domain-containing protein 1 OS=Rattus norvegicus OX=10116 GN=Commd1 PE=1 SV=1	36.8966	51.3277	0	0	0	0	2.2954	0	0	52.5609	30127.7	59.6126
Q8VHU4|ELP1_RAT;tr|F1LP76|F1LP76_RAT	5	5	184.21	0.289828	0.999949	3.77018	149170	Elongator complex protein 1 OS=Rattus norvegicus OX=10116 GN=Elp1 PE=2 SV=1	4303.48	1383.04	18978.4	398.958	809.951	92.2801	6438.52	1183.83	561.85	711.576	49298.2	39702.7
tr|D3ZPR0|D3ZPR0_RAT	9	8	312.39	0.290743	0.999949	1.89893	110214	Chromosome segregation 1-like protein OS=Rattus norvegicus OX=10116 GN=Cse1l PE=1 SV=1	25315.7	29745.8	57839.8	3351.12	15846.7	8274.19	22209.5	63700.2	55105.9	53726.9	67811.1	4004.98
P63322|RALA_RAT	16	15	757.4	0.291996	0.999949	1.88604	23552.8	Ras-related protein Ral-A OS=Rattus norvegicus OX=10116 GN=Rala PE=1 SV=1	305651	256955	232378	480001	2.19435e+06	100199	43781.9	370622	1.05354e+06	279777	56410.4	88482.7
tr|F1LS01|F1LS01_RAT	2	2	84.66	0.292003	0.999949	1.42716	113736	Protocadherin 9 OS=Rattus norvegicus OX=10116 GN=Pcdh9 PE=4 SV=3	95904.3	64129.8	1606.59	109240	26.6454	10523.1	3957	79014.2	196336	37710.7	47403.9	37224.9
tr|D4A6F2|D4A6F2_RAT	3	3	144.21	0.292048	0.999949	1.27595	12835.2	Ly6/neurotoxin 1 OS=Rattus norvegicus OX=10116 GN=Lynx1 PE=4 SV=1	554168	943622	765780	846212	1.28192e+06	463639	724439	419787	1.23453e+06	960367	411287	54855.1
P35171|CX7A2_RAT;tr|B2RYS0|B2RYS0_RAT	5	5	324.5	0.292164	0.999949	1.25125	9352.96	Cytochrome c oxidase subunit 7A2, mitochondrial OS=Rattus norvegicus OX=10116 GN=Cox7a2 PE=1 SV=1	1.57605e+06	2.72288e+06	1.41736e+06	1.83827e+06	2.17687e+06	2.58626e+06	2.21335e+06	2.11453e+06	2.03775e+06	2.36644e+06	213756	898483
tr|A0A0G2K999|A0A0G2K999_RAT;tr|D3ZDA6|D3ZDA6_RAT	15	11	608.14	0.292718	0.999949	1.27416	239877	Sidekick cell adhesion molecule 2 OS=Rattus norvegicus OX=10116 GN=Sdk2 PE=1 SV=1	168970	130732	148574	273733	98059.2	95386.9	188463	88069.2	186381	201045	6997.4	47520.9
tr|D3ZNQ6|D3ZNQ6_RAT	3	2	104.2	0.293033	0.999949	1.5013	20900	Ubiquitin-conjugating enzyme E2M OS=Rattus norvegicus OX=10116 GN=Ube2m PE=1 SV=1	195003	71707.9	132608	30012.5	73545.3	15108.1	77507.3	122634	334696	62370	123159	57282.5
tr|D3ZLM6|D3ZLM6_RAT	1	1	35.24	0.293084	0.999949	2.03142	59218.7	Dolichol kinase OS=Rattus norvegicus OX=10116 GN=Dolk PE=1 SV=1	3440.77	8504.96	35166.4	6991.96	3938.96	2605.19	15806.2	30967.2	28182.6	5405.79	1661.73	41178.8
tr|D4AEK3|D4AEK3_RAT	1	1	43.17	0.293384	0.999949	32.097	114361	Cysteine-rich transmembrane BMP regulator 1 OS=Rattus norvegicus OX=10116 GN=Crim1 PE=4 SV=1	137.403	60.0866	0	14.3695	278.331	0	39.1479	0	230.689	188.767	15192.8	82.2364
tr|F1LR42|F1LR42_RAT	1	1	45.31	0.293517	0.999949	102.71	80376.5	RUN and FYVE domain-containing 1 OS=Rattus norvegicus OX=10116 GN=Rufy1 PE=1 SV=1	47.2168	0	0	31.8928	0	0	0	0	0	58.7661	7211.08	855.473
P21533|RL6_RAT;tr|F1LQS3|F1LQS3_RAT;tr|Q6P790|Q6P790_RAT	11	8	445.4	0.29385	0.999949	1.46442	33561.7	60S ribosomal protein L6 OS=Rattus norvegicus OX=10116 GN=Rpl6 PE=1 SV=5	447608	520671	176733	120033	355631	715427	435143	955947	807672	703985	321083	197201
P63086|MK01_RAT	18	9	788.52	0.294173	0.999949	1.50923	41275.6	Mitogen-activated protein kinase 1 OS=Rattus norvegicus OX=10116 GN=Mapk1 PE=1 SV=3	339745	363549	391150	366318	569177	1.85457e+06	340620	450132	1.14902e+06	393614	28973.1	211476
P27653|C1TC_RAT;tr|G3V6S5|G3V6S5_RAT;tr|Q5EBC3|Q5EBC3_RAT	10	7	326.54	0.294354	0.999949	1.21738	100996	C-1-tetrahydrofolate synthase, cytoplasmic OS=Rattus norvegicus OX=10116 GN=Mthfd1 PE=1 SV=3	70671.2	49890.3	27120.5	15405.1	118700	45601.9	63603.9	99010.4	85654.5	55649	42625.6	52013.5
tr|D3ZXA6|D3ZXA6_RAT	1	1	30.77	0.294669	0.999949	2.20179	98818.7	Pyruvate dehydrogenase phosphatase regulatory subunit OS=Rattus norvegicus OX=10116 GN=Pdpr PE=1 SV=1	26335	123.411	19.3516	2080.82	253.772	126.893	0	0	80.0074	48.7181	12123.1	891.657
P62198|PRS8_RAT	5	3	165.58	0.295588	0.999949	1.66424	45626.1	26S proteasome regulatory subunit 8 OS=Rattus norvegicus OX=10116 GN=Psmc5 PE=1 SV=1	186114	42824.7	146747	399288	60724.7	403563	62316.1	146892	391962	46831.3	69498.7	27143.3
tr|A0A0G2JZA1|A0A0G2JZA1_RAT	14	13	540.69	0.295808	0.999949	1.82852	165789	Roundabout guidance receptor 2 OS=Rattus norvegicus OX=10116 GN=Robo2 PE=4 SV=1	19171.2	10493.4	6043.79	14739.9	26072.8	97855.8	4309.14	29243.4	7467.74	5510	44067.1	4767.84
tr|F1LMW0|F1LMW0_RAT	3	3	102.08	0.29591	0.999949	1.2602	47323	Transmembrane protein 130 OS=Rattus norvegicus OX=10116 GN=Tmem130 PE=4 SV=2	75320	63918.5	90563.8	86627	140303	46151.1	64456.9	84673.9	52232.8	41428.1	11318.7	144941
tr|Q1HL14|Q1HL14_RAT	6	6	328.94	0.295992	0.999949	1.09439	39978.8	Ceramide synthase 1 OS=Rattus norvegicus OX=10116 GN=Cers1 PE=2 SV=1	68791.8	357011	252910	241901	494474	702068	237792	61892.5	1.69155e+06	278025	8891.96	38834.7
P11654|PO210_RAT	3	3	112.24	0.296481	0.999949	2.28981	204157	Nuclear pore membrane glycoprotein 210 OS=Rattus norvegicus OX=10116 GN=Nup210 PE=1 SV=1	0.576024	1730.48	8570.31	164.348	3842.35	12.8475	4890.65	297.657	44.8484	886.791	13876.9	12795.3
tr|A0A0G2JYN4|A0A0G2JYN4_RAT	1	1	37.09	0.296502	0.999949	8.24506	42478.6	ERGIC and golgi 2 OS=Rattus norvegicus OX=10116 GN=Ergic2 PE=1 SV=1	45.8454	13.0691	39.4863	5.44936	15.3652	693.744	0	0	0	34.0071	6668.89	0
tr|G3V8C0|G3V8C0_RAT;tr|Q4KM59|Q4KM59_RAT	1	1	20.82	0.296565	0.999949	1.42094	20140.5	Dynactin subunit 5 OS=Rattus norvegicus OX=10116 GN=Dctn5 PE=1 SV=1	5007.63	912.762	1302.2	0	879.125	188.519	0	1858.53	3738.13	0	0	237.653
tr|D3ZUY8|D3ZUY8_RAT	42	22	2024.28	0.297575	0.999949	1.54701	107675	AP-2 complex subunit alpha OS=Rattus norvegicus OX=10116 GN=Ap2a1 PE=1 SV=1	1.71498e+06	904133	837472	390664	237274	608499	1.2064e+06	1.60088e+06	2.12201e+06	887705	257335	1.18582e+06
Q9JI92|SDCB1_RAT	2	2	59.8	0.29794	0.999949	2.51774	32423.4	Syntenin-1 OS=Rattus norvegicus OX=10116 GN=Sdcbp PE=1 SV=1	70153.6	69856	67648.1	3800.76	299601	7250.41	28384	805.859	11929.8	38091.7	2843.15	123809
O35263|PA1B3_RAT	6	5	162.41	0.298075	0.999949	4.12508	25863.4	Platelet-activating factor acetylhydrolase IB subunit alpha1 OS=Rattus norvegicus OX=10116 GN=Pafah1b3 PE=1 SV=1	4804.55	10161.4	15949.6	3385.47	2857.57	762.366	21843.6	33167.6	1771.47	18544.2	80285.6	814.48
tr|Q5RJN0|Q5RJN0_RAT	8	8	409.82	0.298116	0.999949	1.31286	23945	Complex I-20kD OS=Rattus norvegicus OX=10116 GN=Ndufs7 PE=1 SV=1	424373	333908	84938.8	25265.8	64131.1	89576.2	369996	218512	178563	385425	110394	79102.3
Q6P799|SYSC_RAT;tr|A0A0G2JZG7|A0A0G2JZG7_RAT	7	5	283.09	0.298446	0.999949	1.88527	58588	Serine--tRNA ligase, cytoplasmic OS=Rattus norvegicus OX=10116 GN=Sars1 PE=1 SV=3	43639.2	20082.2	34892.8	21125	43067.8	14754.5	27580.5	45029.4	87992.5	32578.1	129631	11939.5
tr|D3ZX42|D3ZX42_RAT	5	5	141.8	0.298995	0.999949	4.24788	120966	G protein-coupled receptor 21 (Predicted), isoform CRA_a OS=Rattus norvegicus OX=10116 GN=Rabgap1 PE=1 SV=1	6284.96	5621.99	17129.1	883.512	12430.7	928.837	8262.42	3259.03	2195.51	5268.79	131966	32892.2
Q63448|ACOX3_RAT;tr|F1M9A7|F1M9A7_RAT	2	2	94.13	0.299418	0.999949	1.71299	78446	Peroxisomal acyl-coenzyme A oxidase 3 OS=Rattus norvegicus OX=10116 GN=Acox3 PE=1 SV=1	34014.6	249902	100665	3069.31	15628.5	35182.3	26481.2	331512	134538	194087	39916.5	24544.6
Q64560|TPP2_RAT	15	14	585.63	0.299587	0.999949	1.49426	138292	Tripeptidyl-peptidase 2 OS=Rattus norvegicus OX=10116 GN=Tpp2 PE=2 SV=3	211381	130666	309925	7779.99	34950.1	30316.1	245823	245830	236900	147455	189152	18203.2
tr|D3ZQ02|D3ZQ02_RAT	2	2	54.84	0.299594	0.999949	1.03543	49873.1	WD repeat domain 37 OS=Rattus norvegicus OX=10116 GN=Wdr37 PE=1 SV=3	4579.21	7658.25	53602.6	123.249	6774.29	46.5814	27679.4	5795.13	999.782	10344.6	6228.72	19245.9
Q4QQW8|PLBL2_RAT	3	3	106.64	0.299838	0.999949	4.69522	65455.6	Putative phospholipase B-like 2 OS=Rattus norvegicus OX=10116 GN=Plbd2 PE=1 SV=2	431.625	3264.91	26598.9	2651.29	13447.4	733.724	4428.62	1150.8	145062	2980.76	62353.1	5299.9
tr|Q5U302|Q5U302_RAT	13	11	660.61	0.29999	0.999949	1.43468	100236	Catenin (Cadherin associated protein), alpha 1 OS=Rattus norvegicus OX=10116 GN=Ctnna1 PE=1 SV=1	477825	259376	579573	287871	68960.4	206509	383732	332329	215734	335786	17967.9	24930.1
P56603|SCAM1_RAT;tr|A0A0G2JY82|A0A0G2JY82_RAT;tr|A0A0G2K1I6|A0A0G2K1I6_RAT	6	5	269.33	0.300395	0.999949	5.17519	37998.5	Secretory carrier-associated membrane protein 1 OS=Rattus norvegicus OX=10116 GN=Scamp1 PE=1 SV=1	977.807	3925.02	11296.6	118.563	29706.7	17466.8	11960.5	770.165	248431	2762.66	37795.5	26860.3
Q3T1K5|CAZA2_RAT	7	6	317.93	0.301107	0.999949	1.69652	32967.1	F-actin-capping protein subunit alpha-2 OS=Rattus norvegicus OX=10116 GN=Capza2 PE=1 SV=1	908970	517387	986823	295238	33229.7	38518.9	927183	1.31847e+06	1.38824e+06	659907	352197	70618.5
tr|Q6PDV8|Q6PDV8_RAT	3	3	154.63	0.301701	0.999949	1.51791	14758.9	60S ribosomal protein L22 OS=Rattus norvegicus OX=10116 GN=LOC100360057 PE=1 SV=1	601210	534965	368214	440579	832866	1.89701e+06	630114	779402	668151	579458	333235	89433.9
Q63151|ACSL3_RAT	18	14	833.03	0.301806	0.999949	2.73224	80458.3	Fatty acid CoA ligase Acsl3 OS=Rattus norvegicus OX=10116 GN=Acsl3 PE=1 SV=1	98196.2	81860.2	513998	531370	1.15245e+06	2.58204e+06	96098.7	102261	666903	49110.4	430907	470046
Q63155|DCC_RAT;tr|F1LRN5|F1LRN5_RAT	2	2	77.49	0.301861	0.999949	3.09161	157940	Netrin receptor DCC OS=Rattus norvegicus OX=10116 GN=Dcc PE=1 SV=2	0	1538.31	5826.9	0	1235.87	1.00297	5052.65	101.37	4.35938	556.2	223.795	20655.9
Q63468|KPRA_RAT;tr|G3V7B5|G3V7B5_RAT;tr|Q6AYZ7|Q6AYZ7_RAT	1	1	50.74	0.302077	0.999949	2.95107	39435.8	Phosphoribosyl pyrophosphate synthase-associated protein 1 OS=Rattus norvegicus OX=10116 GN=Prpsap1 PE=1 SV=1	23.5158	0	0	14.52	1061.01	0	39.9476	3.05448	0.573344	31.1634	504.977	2663.66
tr|B5DFK1|B5DFK1_RAT;tr|G3V6T1|G3V6T1_RAT	2	2	77.13	0.302529	0.999949	1.01757	138361	Coatomer subunit alpha OS=Rattus norvegicus OX=10116 GN=Copa PE=2 SV=1	313.737	3656.04	11185.5	24.3665	23321.3	288.565	13060.5	1859.34	665.367	3674.05	5234.48	13625.8
Q9JLA3|UGGG1_RAT	50	44	2422.4	0.302907	0.999949	2.73232	176430	UDP-glucose:glycoprotein glucosyltransferase 1 OS=Rattus norvegicus OX=10116 GN=Uggt1 PE=1 SV=2	409682	667494	554880	1.27398e+06	414949	383780	371742	968706	6.4779e+06	548368	394020	1.36188e+06
B0BN18|PFD2_RAT	3	2	116.43	0.303212	0.999949	1.26074	16579.7	Prefoldin subunit 2 OS=Rattus norvegicus OX=10116 GN=Pfdn2 PE=2 SV=1	252099	122092	362676	115747	27826.4	12756.2	173331	209752	318052	203257	170182	51516.2
P53042|PPP5_RAT;tr|Q68G16|Q68G16_RAT	7	6	282.87	0.303297	0.999949	2.28217	56916.8	Serine/threonine-protein phosphatase 5 OS=Rattus norvegicus OX=10116 GN=Ppp5c PE=1 SV=1	38502.3	23404.6	72944.1	1492.41	42422	13853.6	67081	19827.7	24253.2	27262.2	278406	22760.5
P48450|LSS_RAT;tr|A0A0G2JVC8|A0A0G2JVC8_RAT	16	13	842.72	0.303375	0.999949	1.51929	83300.6	Lanosterol synthase OS=Rattus norvegicus OX=10116 GN=Lss PE=1 SV=2	343642	768968	354015	258067	685338	248598	565415	721860	1.40193e+06	614909	184882	550249
Q99ML5|PCYOX_RAT	47	42	2908.24	0.303617	0.999949	1.87592	56287.7	Prenylcysteine oxidase OS=Rattus norvegicus OX=10116 GN=Pcyox1 PE=1 SV=1	2.10793e+06	3.44287e+06	2.92249e+06	413449	3.23792e+06	1.77493e+06	2.8013e+06	4.53585e+06	1.15298e+07	3.29754e+06	766886	3.14303e+06
P55051|FABP7_RAT	9	8	581.46	0.303918	0.999949	1.40087	14864	Fatty acid-binding protein, brain OS=Rattus norvegicus OX=10116 GN=Fabp7 PE=1 SV=2	3.6426e+06	3.00262e+06	3.50963e+06	885575	1.39961e+06	5.07316e+06	2.68223e+06	2.88713e+06	3.92247e+06	2.42066e+06	334449	254718
P12711|ADHX_RAT;tr|Q7TQ90|Q7TQ90_RAT	11	9	359.8	0.304027	0.999949	1.85765	39575.9	Alcohol dehydrogenase class-3 OS=Rattus norvegicus OX=10116 GN=Adh5 PE=1 SV=2	760511	93150.2	286627	133776	295688	864016	176068	354968	440466	88893.9	99140.3	150593
P54319|PLAP_RAT	3	3	177.65	0.304494	0.999949	1.68596	87083.9	Phospholipase A-2-activating protein OS=Rattus norvegicus OX=10116 GN=Plaa PE=1 SV=3	27931.7	28808.3	40772.2	13200.2	52338.6	3641.08	7245.1	12006.8	6455.85	24113.7	4002.99	45046.1
tr|A0A0G2KAH7|A0A0G2KAH7_RAT;tr|B2RYE4|B2RYE4_RAT;tr|E9PTT2|E9PTT2_RAT	1	1	28.25	0.304912	0.999949	15.4589	82019.4	Exostosin glycosyltransferase 2 OS=Rattus norvegicus OX=10116 GN=Ext2 PE=1 SV=1	33.7802	146.695	310.365	530.279	1152.22	0	243.818	292.8	48.4917	49.0369	31230.9	1732.43
Q00954|SCN1B_RAT;tr|A0A0G2JXY6|A0A0G2JXY6_RAT;tr|Q9QXU3|Q9QXU3_RAT	3	3	109.83	0.305314	0.999949	1.38348	24692.1	Sodium channel subunit beta-1 OS=Rattus norvegicus OX=10116 GN=Scn1b PE=1 SV=1	156483	266526	135959	67112	255163	277150	241735	202655	541526	315319	147263	154121
tr|D4AA63|D4AA63_RAT	11	7	693.69	0.305539	0.999949	2.09401	67260	Ubiquilin 2 OS=Rattus norvegicus OX=10116 GN=Ubqln2 PE=1 SV=1	207457	72462.7	135787	15939.7	496548	337247	106061	63363.1	35341.4	62301.4	17404.4	319846
tr|D3ZC55|D3ZC55_RAT	10	7	513.67	0.305636	0.999949	1.9971	74830.4	Heat shock 70kDa protein 12A (Predicted), isoform CRA_a OS=Rattus norvegicus OX=10116 GN=Hspa12a PE=1 SV=1	230089	181598	293104	191942	159344	1.54536e+06	124524	183162	361208	186831	36609.4	410273
O35764|NPTXR_RAT;tr|F1LSY2|F1LSY2_RAT	20	19	1015.56	0.305714	0.999949	1.12777	52370.7	Neuronal pentraxin receptor OS=Rattus norvegicus OX=10116 GN=Nptxr PE=1 SV=1	687807	487221	379690	587523	412295	1.00447e+06	387288	926110	1.3281e+06	322810	12190	179297
O35828|CORO7_RAT;tr|A0A0A0MXU2|A0A0A0MXU2_RAT;tr|A0A0G2K9F9|A0A0G2K9F9_RAT	2	2	77.56	0.305986	0.999949	3.69799	100782	Coronin-7 OS=Rattus norvegicus OX=10116 GN=Coro7 PE=1 SV=2	17.9432	548.293	1330.79	17.3278	864.239	48.065	225.564	171.301	35.5606	480.125	4866.01	4674.4
P57113|MAAI_RAT;tr|A0A0G2K6H2|A0A0G2K6H2_RAT	3	3	99.91	0.306826	0.999949	1.64931	23960.8	Maleylacetoacetate isomerase OS=Rattus norvegicus OX=10116 GN=Gstz1 PE=1 SV=2	174.803	12175.5	8312.57	155.254	24178.8	1468.92	23830.7	3001.57	752.337	3667.84	26554.9	18829.1
Q9ESH6|GLRX1_RAT	2	1	69.86	0.307063	0.999949	1.61693	11878.9	Glutaredoxin-1 OS=Rattus norvegicus OX=10116 GN=Glrx PE=3 SV=3	133780	89576.4	70366.5	88397.7	296615	24873.1	76343.1	13897.8	16388	56447	131820	140254
tr|D3ZWH1|D3ZWH1_RAT	2	2	85.21	0.307267	0.999949	14.3529	242157	Stabilin 1 OS=Rattus norvegicus OX=10116 GN=Stab1 PE=1 SV=2	122.52	255.161	0.00676811	0	32.7821	176.979	80.148	0	119.334	197.768	7527.73	506.622
tr|F1LM55|F1LM55_RAT	4	3	136.24	0.307271	0.999949	2.23502	102793	Cell cycle and apoptosis regulator 2 OS=Rattus norvegicus OX=10116 GN=Ccar2 PE=1 SV=1	7.77831	1315.31	4331.59	9.27673	3903.89	84.8617	3425.98	503.258	42.288	356.571	11149.1	6096.84
tr|D4A9Y0|D4A9Y0_RAT	1	1	50.03	0.307299	0.999949	1.29923	23403.1	RCG36668 OS=Rattus norvegicus OX=10116 GN=Sdf2l1 PE=1 SV=1	165451	255339	195421	274063	206998	589676	268973	242637	392610	311414	68185.8	14598.8
tr|F1M8V2|F1M8V2_RAT	1	1	25.64	0.307626	0.999949	1.78009	133300	Ubiquitination factor E4B OS=Rattus norvegicus OX=10116 GN=Ube4b PE=1 SV=3	40282	99187.6	49806.5	18556.5	47639.7	111334	13846.3	0	528588	79907.7	7298.4	23305.1
tr|D3ZQ57|D3ZQ57_RAT	24	19	1044.72	0.307693	0.999949	1.26046	205948	Plexin B2 OS=Rattus norvegicus OX=10116 GN=Plxnb2 PE=1 SV=1	281564	340442	316843	107251	350254	441769	439528	254849	297878	392239	8058.03	65740.1
Q91XU8|CDS2_RAT;tr|G3V8W2|G3V8W2_RAT	9	5	551.42	0.307722	0.999949	2.53622	51322.9	Phosphatidate cytidylyltransferase 2 OS=Rattus norvegicus OX=10116 GN=Cds2 PE=1 SV=1	80729.4	215658	344734	181975	1.17941e+06	25975.1	42481.8	1.40682e+06	2.34205e+06	252351	189109	911856
tr|F1LQ09|F1LQ09_RAT	3	3	121.18	0.308393	0.999949	1.90022	66195.2	Atlastin GTPase 2 OS=Rattus norvegicus OX=10116 GN=Atl2 PE=1 SV=1	74.3508	308.947	1825	19.5957	4654.09	33.3961	1036.81	304.083	113.158	177.939	4636.73	6871.99
tr|A0A0G2K337|A0A0G2K337_RAT;tr|D4A7W1|D4A7W1_RAT	1	1	32.98	0.309722	0.999949	12.2064	51025.9	Abhydrolase domain-containing 2, acylglycerol lipase OS=Rattus norvegicus OX=10116 GN=Abhd2 PE=1 SV=1	21.6345	2868.76	1437.06	30.7108	86.6708	380.243	288.651	133.695	96.8509	3326.76	54551.1	499.849
tr|B0BN81|B0BN81_RAT	5	4	202.82	0.310065	0.999949	2.04754	22906.4	40S ribosomal protein S5 OS=Rattus norvegicus OX=10116 GN=Rps5 PE=1 SV=1	275256	198842	83853.8	9361.84	119526	31092	133636	20728.3	29244.1	124293	2581.43	40148
Q641X3|HEXA_RAT	2	2	63.95	0.310115	0.999949	3.39011	60538.2	Beta-hexosaminidase subunit alpha OS=Rattus norvegicus OX=10116 GN=Hexa PE=2 SV=1	1037.95	4141.18	4178.71	14989.9	587.897	932.68	1328.27	2158.23	43302.4	7127.57	32732.6	1047.48
Q5XIC0|ECI2_RAT	4	3	181.82	0.310218	0.999949	2.09947	43021.4	Enoyl-CoA delta isomerase 2 OS=Rattus norvegicus OX=10116 GN=Eci2 PE=1 SV=1	122530	108626	137853	33289.3	35246.9	64925.8	159223	182601	437719	184920	69564.7	20896.4
tr|A0A0G2K782|A0A0G2K782_RAT;tr|B5DF95|B5DF95_RAT	2	2	65.25	0.310745	0.999949	2.57797	35219.2	Zinc finger, C2HC-type-containing 1A OS=Rattus norvegicus OX=10116 GN=Zc2hc1a PE=1 SV=1	38831.2	12235.4	36148.1	4888.67	1664.72	60120.8	18019.1	17587.4	14143.6	6046.74	678.405	3218.55
tr|D4A6P1|D4A6P1_RAT	16	16	802.88	0.311957	0.999949	1.27142	99150.9	RCG40132, isoform CRA_a OS=Rattus norvegicus OX=10116 GN=Sez6l2 PE=4 SV=1	342534	335613	255659	60210.8	128773	37786	73807	395204	96971.6	332309	11262.4	3266.29
tr|D3ZI16|D3ZI16_RAT	2	2	76.32	0.311987	0.999949	1.18238	37702.3	COP9 signalosome complex subunit 6 OS=Rattus norvegicus OX=10116 GN=Cops6 PE=1 SV=1	56094.8	7728.97	488.134	45777.2	3120.86	951.288	9080.62	8534.35	4852.76	9492.36	40957.6	62064.7
tr|D3ZJK8|D3ZJK8_RAT	3	3	131.93	0.312382	0.999949	1.45709	12117	PhoLip_ATPase_N domain-containing protein OS=Rattus norvegicus OX=10116 PE=1 SV=3	1.34321e+06	1.79643e+06	1.30759e+06	73727.2	1.49923e+06	2.04878e+06	1.84288e+06	2.5175e+06	3.06492e+06	1.94235e+06	538148	1.85142e+06
Q62785|HAP28_RAT	1	1	55.62	0.31258	0.999949	1.26768	20604.9	28 kDa heat- and acid-stable phosphoprotein OS=Rattus norvegicus OX=10116 GN=Pdap1 PE=1 SV=1	1912.11	3984.07	100.415	22144.8	2039.97	23376.8	0	0	5576.15	5035.26	28345.5	3292.01
tr|A0A0G2JW92|A0A0G2JW92_RAT;tr|D3ZCJ3|D3ZCJ3_RAT	3	3	157.33	0.312873	0.999949	4.2108	82271.1	Major facilitator superfamily domain-containing 6 OS=Rattus norvegicus OX=10116 GN=Mfsd6 PE=1 SV=1	39352.6	17359.1	13467.3	13415.8	4395.6	880.241	14073	232410	91358	17858.1	16975.6	1543.01
D3ZHV2|MACF1_RAT;tr|A0A0G2JU82|A0A0G2JU82_RAT;tr|A0A0G2JWA8|A0A0G2JWA8_RAT;tr|A0A0G2K9T4|A0A0G2K9T4_RAT;tr|M9MMM9|M9MMM9_RAT	8	8	330.86	0.312989	0.999949	1.19991	619608	Microtubule-actin cross-linking factor 1 OS=Rattus norvegicus OX=10116 GN=Macf1 PE=1 SV=1	60.6887	2248.64	8730.74	846.158	19508.8	836.087	10843.5	2142.1	888.516	2638.6	11300.2	10861.6
tr|A0A0G2JXP3|A0A0G2JXP3_RAT;tr|D7NIW0|D7NIW0_RAT;tr|F1LRN8|F1LRN8_RAT	4	2	114.49	0.313078	0.999949	1.17037	110635	HECT-type E3 ubiquitin transferase OS=Rattus norvegicus OX=10116 GN=Nedd4l PE=1 SV=1	3652.85	1498.49	11315.1	10.8746	928.364	8.14824	5474.42	349.443	737.855	2801.44	4091.74	1424.02
Q08602|PGTA_RAT	5	4	188.9	0.313665	0.999949	1.20101	64904.5	Geranylgeranyl transferase type-2 subunit alpha OS=Rattus norvegicus OX=10116 GN=Rabggta PE=1 SV=1	141824	150798	144925	53408.4	15544.8	400.699	99585.3	209553	97802.7	103517	43718.9	54614.3
tr|A0A0G2JUH2|A0A0G2JUH2_RAT;tr|A0A0G2JY21|A0A0G2JY21_RAT;tr|A0A0G2JZQ1|A0A0G2JZQ1_RAT;tr|A0A0G2K7X6|A0A0G2K7X6_RAT;tr|Q5XLP8|Q5XLP8_RAT;tr|Q64LD0|Q64LD0_RAT;tr|Q68FX3|Q68FX3_RAT	1	1	26.1	0.313667	0.999949	1.64075	54249.3	RNA helicase OS=Rattus norvegicus OX=10116 GN=Ddx19a PE=1 SV=1	7639.63	313.088	426.882	3914.9	8175.16	263.065	951.654	0	0	560.845	26685.5	5819.25
Q9R1U7|S22A8_RAT;tr|A0A0G2JSQ3|A0A0G2JSQ3_RAT	1	1	28.13	0.313892	0.999949	7.21634	59186.5	Solute carrier family 22 member 8 OS=Rattus norvegicus OX=10116 GN=Slc22a8 PE=1 SV=1	722.859	499.582	303.026	1028.56	17.9911	90.4237	166.179	9211.54	343.56	304.46	9095.62	91.7212
Q62638|GSLG1_RAT;tr|G3V8G5|G3V8G5_RAT	13	10	599.87	0.313913	0.999949	1.68301	133557	Golgi apparatus protein 1 OS=Rattus norvegicus OX=10116 GN=Glg1 PE=1 SV=1	209529	320503	98180.3	525458	423078	1.23056e+06	176600	570245	409008	372022	21353.9	118798
tr|D3ZN76|D3ZN76_RAT	2	2	61.66	0.315528	0.999949	1.04837	253290	Protein transport protein sec16 OS=Rattus norvegicus OX=10116 GN=Sec16a PE=1 SV=1	4.25655	77.0172	2024.56	0.389652	5555.83	0	447.362	91.4207	14.4201	256.244	153.97	6345.11
tr|E2CWF0|E2CWF0_RAT;tr|E2CWF1|E2CWF1_RAT;tr|Q6AYJ0|Q6AYJ0_RAT	11	1	419.92	0.316038	0.999949	2.26228	58832.7	Serine/threonine-protein phosphatase OS=Rattus norvegicus OX=10116 GN=Ppp3cc PE=2 SV=1	4304.16	1928.6	1278.57	995.191	2077.11	3064.42	3451.99	3115.23	2223.16	2183.52	18756	1145.82
Q63357|MYO1D_RAT	8	7	229.2	0.316419	0.999949	2.02166	116095	Unconventional myosin-Id OS=Rattus norvegicus OX=10116 GN=Myo1d PE=1 SV=3	344.598	8501.62	48006.9	330.329	50355.2	2389.25	25547.2	4725.51	1104.08	9237.15	124461	57161.2
tr|D4A7Y4|D4A7Y4_RAT	1	1	39.61	0.31644	0.999949	7.6575	95202.4	Family with sequence similarity 171, member A1 OS=Rattus norvegicus OX=10116 GN=Fam171a1 PE=1 SV=3	43.0241	0	788.998	0	0	0	100.587	40.7559	81.6288	0	6148.24	0
tr|D3ZUD3|D3ZUD3_RAT	1	1	56.68	0.317234	0.999949	7.57219	46283.6	WAS/WASL-interacting protein family, member 2 OS=Rattus norvegicus OX=10116 GN=Wipf2 PE=1 SV=1	1.4114	2997.23	1135.74	0	6117.03	169.391	1227.76	54.3566	21.6639	2004.64	70388.1	5211.81
P27605|HPRT_RAT	6	4	264.38	0.317742	0.999949	1.59548	24477.2	Hypoxanthine-guanine phosphoribosyltransferase OS=Rattus norvegicus OX=10116 GN=Hprt1 PE=1 SV=1	362991	345362	460687	112257	65342.5	424846	321147	720746	877217	435617	98370.4	373265
O35547|ACSL4_RAT	24	22	1040.96	0.317881	0.999949	1.61815	79065	Long-chain-fatty-acid--CoA ligase 4 OS=Rattus norvegicus OX=10116 GN=Acsl4 PE=1 SV=2	241644	129023	151173	678319	597308	863260	146987	315453	709868	181287	60561.3	230142
tr|F1M5V2|F1M5V2_RAT	1	1	52.96	0.317975	0.999949	172.215	18985.2	GLI pathogenesis-related 2 OS=Rattus norvegicus OX=10116 GN=Glipr2 PE=1 SV=3	7.40718	39.7153	408.615	10.5078	6.53814	300.301	64.1929	46.5919	83.8933	31.6028	132874	36.2777
tr|M0RAP5|M0RAP5_RAT	3	3	112.56	0.318262	0.999949	10.1704	211405	SET-binding factor 1 OS=Rattus norvegicus OX=10116 GN=Sbf1 PE=1 SV=1	295.637	1132.21	1547.07	626.301	2941.07	641.827	5534.31	487.948	370.063	1338.29	63884.9	1449.47
tr|D3ZWX4|D3ZWX4_RAT	2	2	86.03	0.318446	0.999949	5.13323	77503.3	NCK-interacting protein with SH3 domain OS=Rattus norvegicus OX=10116 GN=Nckipsd PE=1 SV=3	813.391	1502.96	11156	625.026	13690.1	83.7189	3973.43	727.935	1540.56	1027.05	113040	22759.7
Q62786|FPRP_RAT;tr|F1M790|F1M790_RAT	3	2	128.53	0.318581	0.999949	1.37381	98730.7	Prostaglandin F2 receptor negative regulator OS=Rattus norvegicus OX=10116 GN=Ptgfrn PE=1 SV=1	34938.8	58343.4	9181.47	1280.88	7608.61	5824.67	39203.4	3798.4	13394.4	29875.1	49309.8	25398.6
tr|A0A0U1RS25|A0A0U1RS25_RAT;tr|F1LY19|F1LY19_RAT	3	2	79.36	0.318586	0.999949	2.30437	123953	UPF1, RNA helicase and ATPase OS=Rattus norvegicus OX=10116 GN=Upf1 PE=1 SV=1	224.946	1287.85	4436.84	88.976	781.666	112.145	2892.38	237.19	135.473	1212.12	8309.82	3187.87
tr|F1LR11|F1LR11_RAT	2	2	126.16	0.318696	0.999949	1.50056	35872.7	Lipid phosphate phosphatase-related protein type 1 OS=Rattus norvegicus OX=10116 GN=Plppr1 PE=3 SV=1	37453.6	204864	126848	32748.6	48096.2	5360.42	21235	10258.2	22557.6	231656	5935.94	11825.2
P57097|MERTK_RAT	2	2	64.97	0.31898	0.999949	5.59511	109423	Tyrosine-protein kinase Mer OS=Rattus norvegicus OX=10116 GN=Mertk PE=2 SV=1	618.949	55.1517	184.931	361.321	21.0504	465.01	78.9188	1067.36	325.413	127.327	7743.21	205.338
P47860|PFKAP_RAT;tr|C7C5T2|C7C5T2_RAT	44	30	2396.42	0.319192	0.999949	1.40966	85720.3	ATP-dependent 6-phosphofructokinase, platelet type OS=Rattus norvegicus OX=10116 GN=Pfkp PE=1 SV=2	2.78703e+06	1.28428e+06	2.27453e+06	768159	402976	939885	1.26102e+06	1.67946e+06	1.7117e+06	1.12812e+06	73102.3	145830
tr|D3ZSY8|D3ZSY8_RAT	3	2	110.58	0.319789	0.999949	2.20012	86649.3	TBC1 domain family, member 10b OS=Rattus norvegicus OX=10116 GN=Tbc1d10b PE=1 SV=1	1641.41	5429.4	57528.6	9286.31	58317.1	1155	22534.2	39532.9	2154.45	5563.39	84619.7	138998
tr|Q8R4R5|Q8R4R5_RAT	10	1	509.47	0.319921	0.999949	1.65052	12615.3	GOA1A splice variant (Fragment) OS=Rattus norvegicus OX=10116 PE=2 SV=1	25891.2	4562.08	1206.49	304.197	5924.95	2958.4	13367.9	32061	11577.2	3925.42	5497.51	990.415
Q6AYS8|DHB11_RAT	1	1	40.37	0.31997	0.999949	1.87471	32937.8	Estradiol 17-beta-dehydrogenase 11 OS=Rattus norvegicus OX=10116 GN=Hsd17b11 PE=2 SV=1	79578.9	18643.4	28947.8	60898.3	310610	425787	23718.5	21690.2	344911	18259.6	22787.1	61759.3
Q63619|COQ7_RAT;tr|A0A0U1RRX6|A0A0U1RRX6_RAT;tr|G3V879|G3V879_RAT	1	1	28.9	0.32098	0.999949	1.29855	20140.1	5-demethoxyubiquinone hydroxylase, mitochondrial (Fragment) OS=Rattus norvegicus OX=10116 GN=Coq7 PE=2 SV=3	0.547054	25780	21273.1	0	28254	0	40562.6	4013	25470	18435.9	0	9309.26
tr|A0A0G2K2C7|A0A0G2K2C7_RAT;tr|D3ZC84|D3ZC84_RAT	12	12	461.85	0.321382	0.999949	1.39942	290225	Ubiquitinyl hydrolase 1 OS=Rattus norvegicus OX=10116 GN=Usp9x PE=1 SV=1	29263.7	81777.6	86645.5	80897.2	49387.2	19830	77826.3	22395.5	49176.8	65379.5	4697.05	29057.7
P37397|CNN3_RAT	5	5	221.57	0.321523	0.999949	2.24938	36434.7	Calponin-3 OS=Rattus norvegicus OX=10116 GN=Cnn3 PE=1 SV=1	9974.61	22799.1	12462.4	68833.8	15002.4	270102	9718.3	4264.3	8428.48	22569.5	122539	9940.15
tr|A0A0G2K0S7|A0A0G2K0S7_RAT	5	3	177.58	0.321559	0.999949	4.24986	80514.5	RAP1 GTPase-activating protein 2 OS=Rattus norvegicus OX=10116 GN=Rap1gap2 PE=1 SV=1	1550.53	361.172	54.4253	1416.25	3779.23	366.572	910.059	595.322	1179.09	1087.02	27579.9	642.303
Q00657|CSPG4_RAT;tr|F1LS79|F1LS79_RAT	2	2	71.92	0.32159	0.999949	1.10096	251906	Chondroitin sulfate proteoglycan 4 OS=Rattus norvegicus OX=10116 GN=Cspg4 PE=1 SV=2	3153.29	3544.01	4636.07	3920.69	2609.53	820.086	2536.06	48.6372	623.716	2588.9	980.509	13792.2
Q9Z1K9|ADA17_RAT;tr|G3V711|G3V711_RAT	2	2	72.81	0.321981	0.999949	3.13951	93017.1	Disintegrin and metalloproteinase domain-containing protein 17 OS=Rattus norvegicus OX=10116 GN=Adam17 PE=1 SV=1	432.808	8470.52	5852.97	2837.23	3890.23	258.193	19848.6	1644.39	521.677	11809.1	32082.2	2353.26
tr|A0A1W2Q656|A0A1W2Q656_RAT	1	1	50.08	0.322029	0.999949	10.4801	79426.9	Delta/notch-like EGF repeat-containing OS=Rattus norvegicus OX=10116 GN=Dner PE=1 SV=1	837.647	129.575	37.3367	1414.41	166.243	1806.88	141.434	917.454	1375.99	190.468	42588.3	815.877
P19132|FRIH_RAT;tr|Q66HI5|Q66HI5_RAT	1	1	20.05	0.322035	0.999949	1.43928	21126.7	Ferritin heavy chain OS=Rattus norvegicus OX=10116 GN=Fth1 PE=1 SV=3	21.8153	25496.9	7662.97	0	56476.3	11.2553	57048.7	4241.96	33.6418	34602.2	296.964	32835.4
Q4KM35|PSB10_RAT	1	1	35.96	0.322455	0.999949	21.3352	29038.2	Proteasome subunit beta type-10 OS=Rattus norvegicus OX=10116 GN=Psmb10 PE=2 SV=1	0.774948	248.771	489.223	0	4.18569	971.426	5.54146	86.5697	380.143	5.69893	34840.7	1258.01
tr|A0A0G2JYD8|A0A0G2JYD8_RAT;tr|G3V7U6|G3V7U6_RAT	11	9	409.89	0.322677	0.999949	2.46863	73211.9	Calpain-5 OS=Rattus norvegicus OX=10116 GN=Capn5 PE=1 SV=1	36829.3	134986	97466.8	8752.14	2626.39	19404.4	71140.1	206532	318225	126263	8737.34	9852.42
P52020|ERG1_RAT	4	2	127.17	0.322852	0.999949	4.13328	64024.2	Squalene monooxygenase OS=Rattus norvegicus OX=10116 GN=Sqle PE=1 SV=1	23289.9	14585.6	11320.3	52323.3	25552.6	16944.4	15246.2	10357.8	452485	23410.7	57257.3	36501.6
tr|M0R6E0|M0R6E0_RAT	31	17	1370.71	0.325056	0.999949	2.42092	90850.8	Phospholipid-transporting ATPase OS=Rattus norvegicus OX=10116 GN=Atp9a PE=1 SV=2	858138	1.42331e+06	668088	357024	177387	134341	1.92354e+06	2.15273e+06	2.51883e+06	1.83451e+06	222555	107430
tr|A0A0G2K8W9|A0A0G2K8W9_RAT;tr|G3V6S0|G3V6S0_RAT;tr|Q6XD99|Q6XD99_RAT	46	40	2084.13	0.325234	0.999949	1.21637	273475	Spectrin beta chain OS=Rattus norvegicus OX=10116 GN=Sptbn1 PE=1 SV=1	944278	443646	1.25599e+06	397576	620723	1.26516e+06	735833	860331	1.63023e+06	626854	47180.2	150471
tr|D3ZVQ0|D3ZVQ0_RAT	15	15	686.54	0.325754	0.999949	1.31879	95779.2	Ubiquitin carboxyl-terminal hydrolase OS=Rattus norvegicus OX=10116 GN=Usp5 PE=1 SV=1	277583	212774	424175	245881	680983	108726	204946	255206	703647	189062	69837.8	56020
Q02253|MMSA_RAT;tr|G3V7J0|G3V7J0_RAT	4	3	167.76	0.326584	0.999949	1.85847	57807.7	Methylmalonate-semialdehyde dehydrogenase [acylating], mitochondrial OS=Rattus norvegicus OX=10116 GN=Aldh6a1 PE=1 SV=1	515.465	12031.8	34855.7	730.147	36642	190.132	27312.7	469.344	7027.69	7179.87	79230.7	36685.3
P35280|RAB8A_RAT;P70550|RAB8B_RAT;tr|B0BMV5|B0BMV5_RAT;tr|F8V328|F8V328_RAT	5	1	180.55	0.327319	0.999949	5.34952	23668.2	Ras-related protein Rab-8A OS=Rattus norvegicus OX=10116 GN=Rab8a PE=1 SV=2	420.524	2630.39	5094.34	311.096	2586.3	72.14	1506.79	3015.73	248.227	1213.38	51535.7	1938.92
O88823|JTB_RAT	1	1	56.26	0.327571	0.999949	1.82495	16385.2	Protein JTB OS=Rattus norvegicus OX=10116 GN=Jtb PE=2 SV=1	587.615	1286.63	517.052	4.33665	9995.06	287.623	1856.14	497.009	147.401	977.933	5449.78	14209.1
O35763|MOES_RAT;tr|A0A096MK30|A0A096MK30_RAT;tr|A0A1W2Q6E9|A0A1W2Q6E9_RAT	8	2	292.03	0.327726	0.999949	4.84213	67739	Moesin OS=Rattus norvegicus OX=10116 GN=Msn PE=1 SV=3	5996.41	3599.15	7656.06	1782.09	2389.49	2268.32	1684.51	12843.6	5221.56	4219.7	88742.5	2005.46
B0BNM9|GLTP_RAT	3	3	150.69	0.327867	0.999949	1.77731	23703.6	Glycolipid transfer protein OS=Rattus norvegicus OX=10116 GN=GLTP PE=2 SV=1	52864.1	49537.3	54303.5	2218.65	19406	132751	70830.3	80909.2	183755	100529	109887	6975.19
tr|D4ABJ2|D4ABJ2_RAT	2	2	80.4	0.328226	0.999949	38.6254	21594.9	Cerebellin 4 precursor OS=Rattus norvegicus OX=10116 GN=Cbln4 PE=1 SV=1	161.024	53.3677	23.611	472.779	60.9482	227.784	66.5627	278.065	232.212	39.2015	37809	181.593
Q9WTV0|PREB_RAT;tr|G3V6W2|G3V6W2_RAT	2	1	64.31	0.328413	0.999949	67.929	45357.3	Prolactin regulatory element-binding protein OS=Rattus norvegicus OX=10116 GN=Preb PE=1 SV=2	339.966	800.629	1584.56	805.205	1060.88	46.4769	434.365	1703.54	534.614	101.099	309235	3026.58
P46933|APBB1_RAT;tr|A0A0G2K3S1|A0A0G2K3S1_RAT	2	1	57.58	0.329008	0.999949	1.21137	77656.6	Amyloid beta precursor protein binding family B member 1 OS=Rattus norvegicus OX=10116 GN=Apbb1 PE=1 SV=3	0	7028.8	22868.6	51.1772	51595.7	4484.46	30318.4	1243.14	353.434	20262.6	21729.8	30304.8
tr|B5DEI0|B5DEI0_RAT	19	18	803.15	0.329512	0.999949	1.99108	54633.5	Pcyox1l protein OS=Rattus norvegicus OX=10116 GN=Pcyox1l PE=2 SV=1	991582	1.13507e+06	686899	134078	463180	449990	863551	1.42067e+06	2.96946e+06	1.10921e+06	122397	1.20187e+06
Q01460|DIAC_RAT	1	1	56.49	0.329636	0.999949	9.76268	41531.2	Di-N-acetylchitobiase OS=Rattus norvegicus OX=10116 GN=Ctbs PE=1 SV=1	28.8099	833.4	3278.34	23.6052	1962.49	1.15711	2409.63	47.7991	22.3061	585.852	54485	2273.19
tr|D3ZKT8|D3ZKT8_RAT	1	1	30.41	0.330504	0.999949	2.90339	22988	5'-deoxynucleotidase HDDC2 OS=Rattus norvegicus OX=10116 GN=Hddc2 PE=1 SV=1	10592.8	4369.35	16169.5	43708.2	50162.2	275.517	2117.56	4125.8	365.926	2085.87	5809.1	28644.4
tr|G3V8A5|G3V8A5_RAT	15	14	708.1	0.330818	0.999949	1.30485	91727	Vacuolar protein sorting-associated protein 35 OS=Rattus norvegicus OX=10116 GN=Vps35 PE=1 SV=1	216390	149136	254743	249051	77667.6	148064	285333	314759	235212	166621	101850	325108
tr|G3V7M0|G3V7M0_RAT	3	3	89.81	0.330999	0.999949	1.26791	266863	CCR4-NOT transcription complex, subunit 1 OS=Rattus norvegicus OX=10116 GN=Cnot1 PE=1 SV=1	8277.28	1313.79	2176.47	6240.45	1780.91	253.97	3903.59	5114.75	1449.34	2765.79	9212.81	2966.36
P37727|RAE1_RAT;tr|A0A0G2KAD5|A0A0G2KAD5_RAT;tr|G3V607|G3V607_RAT	2	2	52.39	0.332247	0.999949	4.44946	72480.4	Rab proteins geranylgeranyltransferase component A 1 OS=Rattus norvegicus OX=10116 GN=Chm PE=1 SV=1	26.9031	247.763	260.361	80.5466	3884.06	48.7653	530.196	228.706	23.5768	249.965	16253.7	2951.78
Q5PPI4|LAMP5_RAT	5	5	238.68	0.332333	0.999949	1.71756	31505.1	Lysosome-associated membrane glycoprotein 5 OS=Rattus norvegicus OX=10116 GN=Lamp5 PE=2 SV=1	254308	360418	54695.3	404118	420345	709684	205340	291080	290547	316815	50344.2	128841
tr|A0A0G2KAW5|A0A0G2KAW5_RAT;tr|D3Z8C7|D3Z8C7_RAT	5	5	188.34	0.33289	0.999949	2.44835	77587.3	USP1-associated factor 1 OS=Rattus norvegicus OX=10116 GN=Wdr48 PE=1 SV=1	1874.68	6904.16	3235.21	275.347	11648.8	509.934	5081.26	434.919	6345.07	1801.03	24726.1	21469.3
P16617|PGK1_RAT	37	31	2222.54	0.332922	0.999949	1.29396	44538.5	Phosphoglycerate kinase 1 OS=Rattus norvegicus OX=10116 GN=Pgk1 PE=1 SV=2	2.41149e+06	2.0279e+06	3.6562e+06	5.11624e+06	2.24621e+06	5.99262e+06	2.47362e+06	3.92801e+06	5.37177e+06	2.28867e+06	1.83168e+06	683802
P02091|HBB1_RAT	21	5	1451.73	0.333118	0.999949	1.20644	15979.4	Hemoglobin subunit beta-1 OS=Rattus norvegicus OX=10116 GN=Hbb PE=1 SV=3	9.8759e+06	5.05923e+06	1.20329e+07	1.08995e+07	1.16159e+07	6.76454e+06	6.27255e+06	1.27106e+07	1.52249e+07	5.83732e+06	469426	6.10822e+06
P45953|ACADV_RAT;tr|Q5M9H2|Q5M9H2_RAT	3	3	116.09	0.333146	0.999949	2.20213	70749.3	Very long-chain specific acyl-CoA dehydrogenase, mitochondrial OS=Rattus norvegicus OX=10116 GN=Acadvl PE=1 SV=1	1151.79	3658.65	4877.87	871.512	4339.96	2518.66	11467	623.999	7571.21	4352.29	12332.9	2010.29
Q5M7W5|MAP4_RAT	19	2	844.43	0.33315	0.999949	1.2384	110301	Microtubule-associated protein 4 OS=Rattus norvegicus OX=10116 GN=Map4 PE=1 SV=1	81342	89258.6	72562.7	111396	210116	103544	35020.4	70211.7	177568	59064.7	68198.5	129517
tr|A0A0G2JW88|A0A0G2JW88_RAT	19	2	867.8	0.33315	0.999949	1.2384	233392	Microtubule-associated protein OS=Rattus norvegicus OX=10116 GN=Map4 PE=1 SV=1	57836	63464.9	51593.7	79204.9	149397	73622.1	24900.3	49922.1	126255	41996.4	48490.7	92089.7
P0C2X9|AL4A1_RAT;tr|A0A0G2JUB9|A0A0G2JUB9_RAT;tr|A0A0G2JUT5|A0A0G2JUT5_RAT;tr|A0A0G2JVM0|A0A0G2JVM0_RAT;tr|A0A0G2K9I7|A0A0G2K9I7_RAT;tr|B4F768|B4F768_RAT;tr|Q7TP27|Q7TP27_RAT	1	1	23.06	0.334242	0.999949	7.11101	61868.7	Delta-1-pyrroline-5-carboxylate dehydrogenase, mitochondrial OS=Rattus norvegicus OX=10116 GN=Aldh4a1 PE=1 SV=1	185.253	150.184	3635.38	157.517	97.6648	0	17.0743	2212.18	1019.55	231.741	26514.2	56.351
Q8CF97|VCIP1_RAT	1	1	28.72	0.334404	0.999949	6.50865	134566	Deubiquitinating protein VCPIP1 OS=Rattus norvegicus OX=10116 GN=Vcpip1 PE=1 SV=2	118570	210.807	120.797	16266.4	20875	4510.13	627.011	2533.35	81.4112	66.7158	5166.39	16192.9
Q5XI55|NGLY1_RAT	1	1	35.94	0.33462	0.999949	1.00329	74676.7	Peptide-N(4)-(N-acetyl-beta-glucosaminyl)asparagine amidase OS=Rattus norvegicus OX=10116 GN=Ngly1 PE=2 SV=2	14.2829	5117.19	15350.5	7.14384	55163.7	107.259	11022.4	159.579	1657.9	1188.73	12846.7	48636.6
B0K020|CISD1_RAT	8	7	348	0.334771	0.999949	1.96398	12096.9	CDGSH iron-sulfur domain-containing protein 1 OS=Rattus norvegicus OX=10116 GN=Cisd1 PE=3 SV=1	1.86193e+06	2.52506e+06	695936	366669	1.4853e+06	3.61271e+06	3.23158e+06	4.20632e+06	6.07637e+06	3.84787e+06	237616	3.11553e+06
tr|G3V7L8|G3V7L8_RAT	23	19	1253.4	0.334872	0.999949	1.28931	26143.4	ATPase, H+ transporting, V1 subunit E isoform 1, isoform CRA_a OS=Rattus norvegicus OX=10116 GN=Atp6v1e1 PE=1 SV=1	4.65464e+06	4.90907e+06	4.25307e+06	7.56242e+06	1.0331e+07	1.26762e+07	3.66378e+06	4.87324e+06	1.24017e+07	4.44844e+06	4.20652e+06	4.83272e+06
tr|Q5XIP2|Q5XIP2_RAT	4	4	151.54	0.335144	0.999949	1.38863	44893.3	GPI-anchor transamidase OS=Rattus norvegicus OX=10116 GN=Pigk PE=1 SV=1	565073	146188	78676.3	356295	71853.8	228135	21040.9	530372	114563	139217	212368	23912.4
Q5U308|LRC8D_RAT;tr|A0A0H2UHA3|A0A0H2UHA3_RAT	3	2	81.26	0.335504	0.999949	1.28688	97939.7	Volume-regulated anion channel subunit LRRC8D OS=Rattus norvegicus OX=10116 GN=Lrrc8d PE=1 SV=1	21.5452	214.95	3956.71	308.892	7872.63	460.323	1312.38	826.08	611.58	335.588	8421.53	5010.01
O35115|FHL2_RAT	1	1	48.11	0.335948	0.999949	5.2503	32086.6	Four and a half LIM domains protein 2 OS=Rattus norvegicus OX=10116 GN=Fhl2 PE=1 SV=1	1414.99	176.488	264.318	1107.21	646.031	308.161	141.951	0	629.141	0	19069.4	725.96
tr|A0A0G2JV14|A0A0G2JV14_RAT;tr|A0A0G2JWT6|A0A0G2JWT6_RAT;tr|Q5FVJ9|Q5FVJ9_RAT	1	1	30.41	0.336436	0.999949	19.8005	35482.7	Peroxisomal membrane protein PEX16 OS=Rattus norvegicus OX=10116 GN=Pex16 PE=1 SV=1	201.394	66.3013	1201.09	395.766	10.3769	2192.58	1603.18	210.518	25.3519	174.339	70958	7567.06
tr|B2RYF8|B2RYF8_RAT;tr|G3V828|G3V828_RAT	3	1	71.94	0.336586	0.999949	1.77876	30617	Cnpy3 protein OS=Rattus norvegicus OX=10116 GN=Cnpy3 PE=2 SV=1	196981	218826	102726	111009	203828	18800.8	256440	297400	592596	228770	92598.2	48001
tr|G3V881|G3V881_RAT;tr|Q562A6|Q562A6_RAT	7	5	255.22	0.337322	0.999949	1.25961	69831.8	Leucine rich repeat neuronal 6A, isoform CRA_a OS=Rattus norvegicus OX=10116 GN=Lingo1 PE=1 SV=1	461690	284030	174016	616140	457277	310580	186646	354570	676069	211260	110722	289653
tr|D3ZBC7|D3ZBC7_RAT	1	1	26.66	0.337485	0.999949	25.4321	40304.1	Dehydrogenase/reductase 13 OS=Rattus norvegicus OX=10116 GN=Dhrs13 PE=1 SV=3	130.949	128.388	161.211	891.993	46.095	213.668	663.163	30.0556	1973.72	375.304	36901.5	43.2567
tr|Q6IN37|Q6IN37_RAT;tr|Q8CJH4|Q8CJH4_RAT	3	3	140.53	0.337659	0.999949	2.04691	21493.1	GM2 ganglioside activator OS=Rattus norvegicus OX=10116 GN=Gm2a PE=1 SV=1	965.338	46584.8	152387	2072.44	43493	428.163	72780.6	8868.3	746.755	46342.4	210782	163878
tr|F1LQN1|F1LQN1_RAT;tr|Q5BJS5|Q5BJS5_RAT	1	1	21.78	0.337794	0.999949	393.325	62779.9	Polypeptide N-acetylgalactosaminyltransferase OS=Rattus norvegicus OX=10116 GN=Galnt16 PE=3 SV=1	23.6231	87.6307	131.14	0.187355	2.82871	0	119.057	5.68767	0	85.328	96303.5	12.3032
A0JPM9|EIF3J_RAT	2	2	83.16	0.338101	0.999949	2.59157	29187.4	Eukaryotic translation initiation factor 3 subunit J OS=Rattus norvegicus OX=10116 GN=Eif3j PE=1 SV=1	399.638	2661.07	22408.5	4.95737	5907.97	316.076	9629.92	1147.08	86.9217	3112.56	55618.5	12553.2
A8WCF8|TPRGL_RAT	1	1	21.71	0.339054	0.999949	6.46763	29844.2	Tumor protein p63-regulated gene 1-like protein OS=Rattus norvegicus OX=10116 GN=Tprg1l PE=1 SV=1	7218.1	1286.96	1109.56	159227	13462.9	13896.3	1151.52	2894.48	3203.49	1629.26	12372.2	9084.9
P26769|ADCY2_RAT	4	2	187.55	0.340224	0.999949	1.28294	123316	Adenylate cyclase type 2 OS=Rattus norvegicus OX=10116 GN=Adcy2 PE=1 SV=1	17827.4	4759.11	1415.68	19977.6	155951	4673.51	1696.95	229.657	119.96	3095.57	110127	44210.6
Q5BJX0|NTM1A_RAT	1	1	60.02	0.340893	0.999949	Infinity	25464.2	N-terminal Xaa-Pro-Lys N-methyltransferase 1 OS=Rattus norvegicus OX=10116 GN=Ntmt1 PE=2 SV=3	0	0	0	0	0	0	0	0	0	0	1997.19	0
tr|F1M9W9|F1M9W9_RAT	1	1	21.85	0.340893	0.999949	Infinity	160349	Similar to TRS85 homolog (Predicted) OS=Rattus norvegicus OX=10116 GN=Trappc8 PE=1 SV=2	0	0	12556.7	0	0	0	0	0	0	0	0	0
tr|D3ZUJ8|D3ZUJ8_RAT	2	1	55.21	0.340893	0.999949	Infinity	104063	Dolichyl-phosphate-mannose--protein mannosyltransferase OS=Rattus norvegicus OX=10116 GN=Tmtc3 PE=1 SV=1	0	0	0	13416.7	0	0	0	0	0	0	0	0
P26817|ARBK1_RAT	1	1	22.48	0.340893	0.999949	Infinity	79784.9	Beta-adrenergic receptor kinase 1 OS=Rattus norvegicus OX=10116 GN=Grk2 PE=1 SV=1	0	0	0	0	0	1452.87	0	0	0	0	0	0
tr|Q3KRE2|Q3KRE2_RAT	8	7	488.05	0.341348	0.999949	2.79351	28142	Methyltransferase like 7A, isoform CRA_b OS=Rattus norvegicus OX=10116 GN=Mettl7a PE=1 SV=1	105939	189557	129205	1.66465e+06	29544.3	591433	69970.9	437050	224414	188244	27471.5	23073.8
Q6TEK3|VKORL_RAT	3	3	115.39	0.341351	0.999949	4.95852	19778.5	Vitamin K epoxide reductase complex subunit 1-like protein 1 OS=Rattus norvegicus OX=10116 GN=Vkorc1l1 PE=1 SV=1	11082	42875.1	34181.8	858520	41176.9	248808	11122.5	53419.2	63379.6	54676.1	28222.7	38577.8
tr|D4A4H5|D4A4H5_RAT	9	9	663.66	0.341563	0.999949	2.45735	24056.1	Stromal cell derived factor 2 (Predicted), isoform CRA_b OS=Rattus norvegicus OX=10116 GN=Sdf2 PE=1 SV=2	70504.9	195723	140833	146415	26770.6	25707.3	95612.6	244903	791291	137056	203293	16886.7
P21707|SYT1_RAT	26	15	1481.58	0.341581	0.999949	1.29777	47399	Synaptotagmin-1 OS=Rattus norvegicus OX=10116 GN=Syt1 PE=1 SV=3	3.12493e+06	3.26705e+06	3.26879e+06	7.41942e+06	3.00014e+06	8.28427e+06	2.14235e+06	3.29895e+06	6.09815e+06	2.41983e+06	1.33464e+06	6.56246e+06
tr|D4A857|D4A857_RAT	5	4	209.28	0.341907	0.999949	1.15284	116012	Importin 9 OS=Rattus norvegicus OX=10116 GN=Ipo9 PE=1 SV=2	26875.7	44163.4	55295	69235.6	168057	12156.8	12269.1	100557	162515	44700.8	2482.54	3439.65
tr|F1LRA1|F1LRA1_RAT	19	19	756.92	0.342781	0.999949	1.48327	57986.2	Protein ERGIC-53 OS=Rattus norvegicus OX=10116 GN=Lman1 PE=1 SV=3	545165	479400	209034	770531	445724	1.59282e+06	254617	844528	666982	529604	78050.5	351734
tr|D3ZWQ0|D3ZWQ0_RAT	3	3	140.56	0.34332	0.999949	1.27057	101428	Proline-rich transmembrane protein 3 OS=Rattus norvegicus OX=10116 GN=Prrt3 PE=1 SV=2	82952	44404.8	38703.8	51749	37654.1	9962.32	71614.6	21505.3	8105.62	55004.7	1138.44	51533.8
tr|A1L117|A1L117_RAT;tr|B0BMV0|B0BMV0_RAT;tr|F1LRZ9|F1LRZ9_RAT	1	1	41.84	0.343366	0.999949	2.33928	44275.8	Rap2ip protein (Fragment) OS=Rattus norvegicus OX=10116 GN=Rundc3a PE=2 SV=1	29431.4	22129	27645.4	12368.6	4461.95	10834	24764.5	35102.6	146022	26996.7	9867.39	7245.99
P42667|SC11A_RAT;tr|Q6P9X2|Q6P9X2_RAT	1	1	26.17	0.343383	0.999949	6.26448	20599.2	Signal peptidase complex catalytic subunit SEC11A OS=Rattus norvegicus OX=10116 GN=Sec11a PE=2 SV=1	7423.06	1231.49	12998.2	2240.04	10.3003	821.065	3475.7	681.712	3141.39	633.524	138069	8882.75
O88407|LFG2_RAT;tr|M0R531|M0R531_RAT	1	1	67.19	0.343786	0.999949	1.19433	35035.6	Protein lifeguard 2 OS=Rattus norvegicus OX=10116 GN=Faim2 PE=2 SV=1	14197	45.727	34.7836	2282.88	21377.5	0	1039.32	0	0	32.3759	0	30693.4
tr|A0A1W2Q6C2|A0A1W2Q6C2_RAT;tr|D4A6U1|D4A6U1_RAT	5	3	251.86	0.344712	0.999949	6.79457	84871.2	ADAM metallopeptidase domain 11 OS=Rattus norvegicus OX=10116 GN=Adam11 PE=4 SV=1	98.4831	2261.69	2595.25	18.1385	49.6819	16686.6	2191.91	42.4107	4909.69	2835.63	137041	488.943
tr|A0A0G2K435|A0A0G2K435_RAT;tr|G3V8B8|G3V8B8_RAT;tr|Q75N36|Q75N36_RAT	1	1	46.45	0.34528	0.999949	1.08247	65528.3	DnaJ heat shock protein family (Hsp40) member C7 OS=Rattus norvegicus OX=10116 GN=Dnajc7 PE=1 SV=1	0	1817.85	4617.39	186.474	37825.4	21.3106	9589.38	567.648	42.5222	1877.84	3793.13	32265.1
Q9Z0W7|CLIC4_RAT;tr|G3V8C4|G3V8C4_RAT	4	2	170.4	0.34533	0.999949	1.25082	28633	Chloride intracellular channel protein 4 OS=Rattus norvegicus OX=10116 GN=Clic4 PE=1 SV=3	1862.49	2023.48	12284.3	6171.21	6181.77	264.734	6965.12	2744.85	2972.68	4093.32	5385.75	13846.9
P68035|ACTC_RAT	42	4	2108.54	0.34594	0.999949	1.15573	42019	Actin, alpha cardiac muscle 1 OS=Rattus norvegicus OX=10116 GN=Actc1 PE=2 SV=1	9.88327e+06	5.95017e+06	5.27948e+06	4.91868e+06	1.58648e+07	1.10878e+07	8.77219e+06	1.06297e+07	1.80426e+07	6.3692e+06	1.48331e+06	547815
P18265|GSK3A_RAT;tr|A0A0G2K7W7|A0A0G2K7W7_RAT	4	2	198.32	0.346191	0.999949	3.63005	51026.9	Glycogen synthase kinase-3 alpha OS=Rattus norvegicus OX=10116 GN=Gsk3a PE=1 SV=1	3914.05	1286.07	49350.2	3513.24	39082.6	56951.9	9983.2	5237.64	14947.8	2392.89	8702.91	1186.25
P17078|RL35_RAT	3	2	94.81	0.346471	0.999949	2.09465	14552.5	60S ribosomal protein L35 OS=Rattus norvegicus OX=10116 GN=Rpl35 PE=1 SV=3	673591	686223	485299	122807	96493.4	314149	730389	1.54119e+06	1.31321e+06	914349	428902	54224.1
Q4FZY0|EFHD2_RAT	1	1	30.22	0.346703	0.999949	1.88302	26759.1	EF-hand domain-containing protein D2 OS=Rattus norvegicus OX=10116 GN=Efhd2 PE=1 SV=1	112561	17786.9	102033	7929.8	150142	18496	29286.2	45344.3	1627.22	23682	7657.26	109580
tr|D3ZDU2|D3ZDU2_RAT	2	2	72.83	0.346805	0.999949	3.47895	149493	Regulatory-associated protein of MTOR, complex 1 OS=Rattus norvegicus OX=10116 GN=Rptor PE=1 SV=2	167.806	8111.26	11650.6	1976.16	1368.32	0.126021	3837.59	272.575	713.402	889.728	58499.1	16757.7
tr|A0A0G2K5B0|A0A0G2K5B0_RAT;tr|D4A3Z3|D4A3Z3_RAT	3	2	99.4	0.346993	0.999949	1.05068	63410	TBC1 domain family member 24 OS=Rattus norvegicus OX=10116 GN=Tbc1d24 PE=1 SV=1	328.937	947.678	2848.66	0	113.632	4148.45	240.82	1417.79	2848.06	897.286	3056.62	351.867
P31652|SC6A4_RAT	1	1	26.35	0.347622	0.999949	2.30111	70171.8	Sodium-dependent serotonin transporter OS=Rattus norvegicus OX=10116 GN=Slc6a4 PE=1 SV=1	0	264.241	79809.3	0	1897.46	290.306	7410.34	0	544.593	1526.24	135077	44734
tr|D3ZBT9|D3ZBT9_RAT;tr|F1MAH5|F1MAH5_RAT	3	1	112.52	0.34801	0.999949	1.20836	97513.8	Protein phosphatase 6, regulatory subunit 3 OS=Rattus norvegicus OX=10116 GN=Ppp6r3 PE=1 SV=2	5777.77	892.005	231.005	3908.21	836.703	4602.51	253.639	1037.85	7.33526	5330.51	6507.82	309.324
P97874|GAK_RAT;tr|F1LMD9|F1LMD9_RAT	1	1	31.06	0.348264	0.999949	46.8483	143703	Cyclin-G-associated kinase OS=Rattus norvegicus OX=10116 GN=Gak PE=1 SV=1	29.2551	376.664	176.522	21.2928	104.628	743.936	68.2947	107.829	37.4776	89.3032	61159.3	6575.43
Q5PQN1|HERC4_RAT	1	1	48.86	0.348587	0.999949	1.26382	118540	Probable E3 ubiquitin-protein ligase HERC4 OS=Rattus norvegicus OX=10116 GN=Herc4 PE=2 SV=1	0	8697.02	4903.2	28.9023	1170.82	2.65003	1472.11	42.6626	49.6592	1140.38	12322.1	3680.83
Q5U2U0|CLPX_RAT	1	1	23.33	0.349152	0.999949	19.0448	69207.8	ATP-dependent Clp protease ATP-binding subunit clpX-like, mitochondrial OS=Rattus norvegicus OX=10116 GN=Clpx PE=2 SV=1	0	9.29785	513.056	0	15.3511	0	16.8598	0	0	108.109	9944.22	171.284
Q641Y0|OST48_RAT	14	13	731.67	0.349235	0.999949	3.25429	48895.7	Dolichyl-diphosphooligosaccharide--protein glycosyltransferase 48 kDa subunit OS=Rattus norvegicus OX=10116 GN=Ddost PE=2 SV=1	1.22561e+06	2.01115e+06	1.57806e+06	330622	367280	458016	2.07647e+06	2.60038e+06	1.21015e+07	1.97636e+06	182194	493593
P15684|AMPN_RAT;tr|A0A0G2JVE6|A0A0G2JVE6_RAT;tr|G3V7W7|G3V7W7_RAT	1	1	53.84	0.349506	0.999949	21.408	109448	Aminopeptidase N OS=Rattus norvegicus OX=10116 GN=Anpep PE=1 SV=2	24.097	37.0291	398.749	26.1285	560.103	11.0138	29.2218	55.9424	28.3164	51.6	19541.6	2924.07
Q6VBQ5|MYADM_RAT;tr|Q05BA4|Q05BA4_RAT	7	7	334.09	0.349684	0.999949	1.19045	35148.3	Myeloid-associated differentiation marker OS=Rattus norvegicus OX=10116 GN=Myadm PE=1 SV=1	1.13144e+06	1.59989e+06	949761	513676	1.23679e+06	915930	1.10323e+06	828726	1.50963e+06	1.46363e+06	371784	55009.6
Q5U2Q3|CK054_RAT	1	1	30.66	0.350775	0.999949	8.95552	34992.9	Ester hydrolase C11orf54 homolog OS=Rattus norvegicus OX=10116 PE=1 SV=1	846.98	1578.9	963.538	274.351	1185.29	202.746	360.826	545.437	445.503	1167.97	40510.1	2211.73
tr|A0A0G2K542|A0A0G2K542_RAT;tr|Q4V8I9|Q4V8I9_RAT	7	6	240.26	0.351165	0.999949	1.33581	56886.3	UTP--glucose-1-phosphate uridylyltransferase OS=Rattus norvegicus OX=10116 GN=Ugp2 PE=1 SV=1	341163	283815	356230	253263	77495.3	124870	277230	421930	395500	329735	394352	100589
tr|D4A1B8|D4A1B8_RAT	4	4	121.86	0.35139	0.999949	1.29447	21112.5	Dynactin subunit 3 OS=Rattus norvegicus OX=10116 GN=Dctn3 PE=1 SV=1	264082	111786	96706.4	178550	204682	203315	170610	193907	332535	128986	388411	156548
Q9QXY2|SRCN1_RAT	14	11	551.56	0.352454	0.999949	1.09674	129744	SRC kinase signaling inhibitor 1 OS=Rattus norvegicus OX=10116 GN=Srcin1 PE=1 SV=1	145632	117661	67609	134999	214702	93330	174769	161431	213033	134938	4773.26	16722.6
Q3SWT5|S41A3_RAT;tr|A0A0G2K1G1|A0A0G2K1G1_RAT	3	3	120.62	0.352528	0.999949	2.58971	50526.5	Solute carrier family 41 member 3 OS=Rattus norvegicus OX=10116 GN=Slc41a3 PE=2 SV=1	1495.62	2042.58	3433.65	17772	2066.62	33.5777	2039.89	13.5538	0.711038	184.323	994.418	66285.4
tr|G3V7V6|G3V7V6_RAT	6	5	194.94	0.352617	0.999949	5.4831	67477.6	All-trans-13,14-dihydroretinol saturase, isoform CRA_b OS=Rattus norvegicus OX=10116 GN=Retsat PE=1 SV=1	3265.17	4149.99	14229.8	11989.7	34284.5	8441.75	1592.28	13864	132362	6225.39	243532	21119.1
tr|Q4V7D4|Q4V7D4_RAT	3	1	82.14	0.35365	0.999949	10.9814	50824.9	Family with sequence similarity 126, member B OS=Rattus norvegicus OX=10116 GN=Fam126b PE=1 SV=1	225.851	1728.48	604.879	186.545	313.437	0	621.911	45.8882	23.6328	1093.53	28040.5	3768.73
Q5XI78|ODO1_RAT	19	14	982.13	0.353814	0.999949	1.25496	116296	2-oxoglutarate dehydrogenase, mitochondrial OS=Rattus norvegicus OX=10116 GN=Ogdh PE=1 SV=1	390229	813998	172705	390271	169152	160865	226132	344952	385337	658285	16987.2	39451.5
P04904|GSTA3_RAT;tr|B6DYP8|B6DYP8_RAT;tr|Q9JLX3|Q9JLX3_RAT	3	3	99.51	0.354147	0.999949	1.82724	25319.4	Glutathione S-transferase alpha-3 OS=Rattus norvegicus OX=10116 GN=Gsta3 PE=1 SV=3	13679.6	21157.6	101977	10487.9	219298	117994	61929.9	21656.3	6589.02	21373.1	2854.72	150803
P68101|IF2A_RAT	6	5	217.98	0.355245	0.999949	1.39766	36108.2	Eukaryotic translation initiation factor 2 subunit 1 OS=Rattus norvegicus OX=10116 GN=Eif2s1 PE=1 SV=2	37385.5	26135.1	38383.7	2358.84	8352.1	530.17	6974.38	30934.5	14563.9	32445.6	66984.8	6235.12
tr|A0A0G2K4Y7|A0A0G2K4Y7_RAT;tr|A0A0G2K9S4|A0A0G2K9S4_RAT;tr|A0A0G2K9X3|A0A0G2K9X3_RAT	8	6	339.71	0.355528	0.999949	1.01211	212154	Unconventional myosin-Va OS=Rattus norvegicus OX=10116 GN=Myo5a PE=1 SV=1	8541.29	32229.5	40083.9	11513.5	12614.6	14355.5	13969	630.03	226.281	35592.5	40333.6	30031.5
tr|F1M7W0|F1M7W0_RAT	8	4	303.27	0.355588	0.999949	1.05332	114975	Receptor protein-tyrosine kinase OS=Rattus norvegicus OX=10116 GN=Epha5 PE=4 SV=2	2627.69	609.343	5112.5	21098.4	12647.9	2716.75	1309.35	898.443	361.352	423.284	39450.4	4759.16
P13471|RS14_RAT;tr|Q6PDV6|Q6PDV6_RAT	1	1	50.06	0.355655	0.999949	1.66111	16258.7	40S ribosomal protein S14 OS=Rattus norvegicus OX=10116 GN=Rps14 PE=2 SV=3	113210	9854.84	84074.8	98948.7	38185.7	6919.09	6582.64	97231.6	17492.4	3825.3	75411.3	10877.1
Q5BJS7|CPNE9_RAT;tr|A0A140TAJ0|A0A140TAJ0_RAT	8	4	366.3	0.355775	0.999949	1.48554	61811	Copine-9 OS=Rattus norvegicus OX=10116 GN=Cpne9 PE=2 SV=1	25662.5	41594.6	15558.7	1014.38	8721.48	1491.87	2257.99	51263.4	11081.7	25006.2	31512.3	18583.7
tr|A0A0G2K1K5|A0A0G2K1K5_RAT;tr|D3ZHI8|D3ZHI8_RAT	2	2	99.24	0.356059	0.999949	21.1251	135045	Trafficking protein particle complex subunit 11 OS=Rattus norvegicus OX=10116 GN=Trappc11 PE=1 SV=1	1443.73	56.9883	21.8326	0.298055	715.9	0	747.13	6.88894	38.2487	70.4534	46394.4	36.6028
Q9EPX4|P2Y12_RAT	5	5	231.7	0.356338	0.999949	1.39592	39047.3	P2Y purinoceptor 12 OS=Rattus norvegicus OX=10116 GN=P2ry12 PE=1 SV=1	120188	248476	290506	273123	65942.5	400830	294453	270349	179082	171847	782098	255155
Q5XI74|EEPD1_RAT	1	1	45.08	0.356682	0.999949	3.72714	62868.5	Endonuclease/exonuclease/phosphatase family domain-containing protein 1 OS=Rattus norvegicus OX=10116 GN=Eepd1 PE=1 SV=1	0	201.638	1050.75	120.321	314.689	6217.19	791.459	50.1487	474.919	255.457	26248.2	1641.36
Q9WVK3|PECR_RAT;tr|A0A0G2JUF1|A0A0G2JUF1_RAT;tr|A0A0G2JVG4|A0A0G2JVG4_RAT;tr|A0A0G2K6H4|A0A0G2K6H4_RAT	2	2	54.55	0.357691	0.999949	2.35806	32433.2	Peroxisomal trans-2-enoyl-CoA reductase OS=Rattus norvegicus OX=10116 GN=Pecr PE=2 SV=1	20941.7	35468.3	9761.25	5774.29	39208.5	2279.69	41350.5	1383.96	96815.1	55371.5	52245.2	20317
Q9JIR4|RIMS1_RAT;tr|A0A0G2JT77|A0A0G2JT77_RAT;tr|A0A0G2K708|A0A0G2K708_RAT;tr|A0A0G2KA18|A0A0G2KA18_RAT;tr|A0A0G2KAV8|A0A0G2KAV8_RAT;tr|F1LYS1|F1LYS1_RAT	3	3	128.44	0.357834	0.999949	7.34055	179654	Regulating synaptic membrane exocytosis protein 1 OS=Rattus norvegicus OX=10116 GN=Rims1 PE=1 SV=1	1.3805	42.1169	2394.22	2.15565	49.8419	0.00518928	991.822	3.54423	5.40011	1.0555	11832.2	5441.89
Q91XT9|ASAH2_RAT	3	2	115.41	0.357871	0.999949	2.91059	83487.8	Neutral ceramidase OS=Rattus norvegicus OX=10116 GN=Asah2 PE=1 SV=1	0.101371	4726.55	11294.8	5.49473	2983.22	359.391	8865.05	131.183	22.1556	3098.21	37766.7	6493.55
tr|D4A8F2|D4A8F2_RAT	2	2	85.25	0.35827	0.999949	2.15379	31337.1	Ras suppressor protein 1 OS=Rattus norvegicus OX=10116 GN=Rsu1 PE=1 SV=3	9421.24	26218.6	4799.63	59826	25368.9	9960.57	9822.66	49459.8	10498.4	17276.3	33838.9	171148
P62882|GNB5_RAT;tr|D3ZZ54|D3ZZ54_RAT;tr|M0RAX4|M0RAX4_RAT;tr|Q45QL0|Q45QL0_RAT	3	3	178.29	0.358304	0.999949	1.43909	38731.6	Guanine nucleotide-binding protein subunit beta-5 OS=Rattus norvegicus OX=10116 GN=Gnb5 PE=2 SV=1	37210.5	23115.6	33473.2	72674.7	233076	80536.9	13820.6	72129.4	113249	18370.3	112039	3995.89
Q62696|DLG1_RAT;tr|A0A0G2K1M2|A0A0G2K1M2_RAT;tr|F1LNM0|F1LNM0_RAT	5	1	143.9	0.358793	0.999949	4.35698	100571	Disks large homolog 1 OS=Rattus norvegicus OX=10116 GN=Dlg1 PE=1 SV=1	346989	8003.89	7988.45	99885.5	10844.4	21580.2	8822.12	14991.3	5784.01	8458.09	49157.5	26464.8
tr|D3ZF12|D3ZF12_RAT	3	2	95.27	0.358866	0.999949	1.66523	20327.4	Signal peptidase complex subunit 3 OS=Rattus norvegicus OX=10116 GN=Spcs3 PE=1 SV=1	23081.4	18579.4	22119.7	142097	23118.7	11477.3	32089.7	2085.33	12221.2	19163.1	10668.9	68180.5
Q10468|B4GN1_RAT	2	2	101.03	0.358994	0.999949	49.6903	59279	Beta-1,4 N-acetylgalactosaminyltransferase 1 OS=Rattus norvegicus OX=10116 GN=B4galnt1 PE=1 SV=1	50.4059	23.8095	146.951	110.633	39.3676	66.941	76.0978	104.206	20.5654	48.6069	21395.9	124.361
P42676|NEUL_RAT;tr|A0A0G2JSY3|A0A0G2JSY3_RAT;tr|A0A0G2JVK4|A0A0G2JVK4_RAT	5	3	220.81	0.359342	0.999949	1.32858	80254	Neurolysin, mitochondrial OS=Rattus norvegicus OX=10116 GN=Nln PE=1 SV=1	94484.7	93268.7	66343.5	3.88625	6205.42	4765.1	69566.5	93912.7	68000.7	105111	13623.7	1954.83
D4A6D7|TTC19_RAT	1	1	47.6	0.359449	0.999949	2.63758	41333.4	Tetratricopeptide repeat protein 19, mitochondrial OS=Rattus norvegicus OX=10116 GN=Ttc19 PE=3 SV=1	215.386	10145	18685.8	103.939	23283.5	44.7778	43753.8	1986.27	30.9675	17304.7	24420	50920.1
tr|D3ZUP8|D3ZUP8_RAT	5	4	171.49	0.359494	0.999949	1.22971	81082.1	LMBR1 domain-containing 2 OS=Rattus norvegicus OX=10116 GN=Lmbrd2 PE=1 SV=1	72785.5	135072	96977.7	53997	99539.8	35523.3	92947.7	48306.4	11995.5	146692	28745	72950.5
tr|A0A0G2K2V2|A0A0G2K2V2_RAT;tr|G3V9N8|G3V9N8_RAT	22	10	934.77	0.359797	0.999949	1.27942	103824	AP complex subunit beta OS=Rattus norvegicus OX=10116 GN=Ap1b1 PE=1 SV=1	63155.1	64242.9	27740.8	36784.8	78434.3	84554.8	31276.1	64627.5	60598.3	41044.8	51074.8	28780.5
tr|A0A0G2JVK8|A0A0G2JVK8_RAT;tr|D3ZFT1|D3ZFT1_RAT;tr|O88461|O88461_RAT;tr|Q9Z2R7|Q9Z2R7_RAT	1	1	26.26	0.359902	0.999949	1.0196	72984.3	Replication factor C subunit 1 OS=Rattus norvegicus OX=10116 GN=Rfc1 PE=1 SV=1	24.2359	83143.6	119188	8.81395	12522.4	44.9149	82972.4	74702.5	1621.49	48756.8	48.6861	11043.9
Q2TL32|UBR4_RAT;tr|A0A0G2JU89|A0A0G2JU89_RAT;tr|F1LQI5|F1LQI5_RAT	10	8	300.19	0.359908	0.999949	2.23473	573799	E3 ubiquitin-protein ligase UBR4 OS=Rattus norvegicus OX=10116 GN=Ubr4 PE=1 SV=2	768.667	3115.63	26318.1	1717.89	10604.8	696.118	16707.9	2959.42	705.199	2835.27	37154.5	36225.2
tr|D4A414|D4A414_RAT;tr|I6L9I0|I6L9I0_RAT	2	2	47.57	0.360021	0.999949	1.45247	45914.1	COX15 homolog, cytochrome c oxidase assembly protein (Yeast), isoform CRA_a OS=Rattus norvegicus OX=10116 GN=Cox15 PE=1 SV=1	76.8581	20176	56316.5	7.73417	23363.9	2740.38	58512.7	9736.77	99.5152	18639.2	35468.2	26684.6
tr|A0A0G2JYU6|A0A0G2JYU6_RAT;tr|D3ZAZ1|D3ZAZ1_RAT	1	1	42.86	0.360116	0.999949	104.292	122807	Formin-like 1 OS=Rattus norvegicus OX=10116 GN=Fmnl1 PE=1 SV=1	68.5718	0	0	86.7496	0.0450932	1.16566	0.637749	1.2548	6.45766	1.26976	16022.6	292.88
P23785|GRN_RAT;tr|G3V8V1|G3V8V1_RAT	5	5	289.19	0.36013	0.999949	1.22173	63369.9	Progranulin OS=Rattus norvegicus OX=10116 GN=Grn PE=1 SV=3	1008.05	158409	109362	3892.76	339741	9171.57	29878.7	24842.4	447391	97538.9	22315.8	137441
Q9Z2Z8|DHCR7_RAT	9	9	489.21	0.360336	0.999949	5.15033	54155.1	7-dehydrocholesterol reductase OS=Rattus norvegicus OX=10116 GN=Dhcr7 PE=1 SV=1	152217	169877	82556.9	63628	169836	1.16703e+06	194258	471045	8.07089e+06	297524	205274	58103
Q6IFW6|K1C10_RAT;tr|A0A0G2K2V6|A0A0G2K2V6_RAT	20	12	796	0.360552	0.999949	1.29549	56505.1	Keratin, type I cytoskeletal 10 OS=Rattus norvegicus OX=10116 GN=Krt10 PE=3 SV=1	816271	291301	213568	888193	701561	1.757e+06	289500	505963	1.66599e+06	225472	19167.2	897097
tr|Q99PS2|Q99PS2_RAT;tr|Q9JJ76|Q9JJ76_RAT	1	1	42.01	0.360865	0.999949	60.8441	56923.7	Casein kinase 1, epsilon OS=Rattus norvegicus OX=10116 GN=Csnk1e PE=1 SV=1	33.2286	46.46	56.1899	175.242	0	21.196	1.93971	0	0	0	20217.6	0
tr|A0A0G2K0H6|A0A0G2K0H6_RAT;tr|B2RZ63|B2RZ63_RAT;tr|G3V6Q3|G3V6Q3_RAT	1	1	40.84	0.361349	0.999949	1.57855	42970.9	WD repeat domain 13 OS=Rattus norvegicus OX=10116 GN=Wdr13 PE=1 SV=1	245.049	19628.6	10948.9	77.3413	211644	85.6618	90286.9	559.297	103.044	37257.4	113773	141024
tr|D3ZYM7|D3ZYM7_RAT	1	1	30.78	0.36172	0.999949	2.23175	10816.5	LYR motif-containing 4 OS=Rattus norvegicus OX=10116 GN=Lyrm4 PE=1 SV=1	25299.9	1989.17	51.7834	13241.8	577.537	171.063	33.6137	62.7329	43.5575	272.991	15591.5	2515.37
Q9WUC4|ATOX1_RAT	1	1	28.41	0.36251	0.999949	1.96718	7292.44	Copper transport protein ATOX1 OS=Rattus norvegicus OX=10116 GN=Atox1 PE=1 SV=1	23021.6	15521.7	151882	5805.87	76894.6	39785.2	58826.9	14434.7	8518.82	18046.2	2805.61	56434.1
Q9JHZ4|GRAP1_RAT	2	2	103.43	0.362836	0.999949	1.72119	96073.8	GRIP1-associated protein 1 OS=Rattus norvegicus OX=10116 GN=Gripap1 PE=1 SV=1	1097.93	78.2354	10.4401	2052.08	3.03286	21166.2	3.78887	0	0	104.289	13694.9	377.864
P54708|AT12A_RAT;tr|A0A0G2JWS9|A0A0G2JWS9_RAT;tr|G3V8S4|G3V8S4_RAT	46	4	2011.91	0.363083	0.999949	2.28469	114975	Potassium-transporting ATPase alpha chain 2 OS=Rattus norvegicus OX=10116 GN=Atp12a PE=1 SV=1	825709	526476	112092	6747.44	497155	30480.5	209246	15055.8	2813.85	183748	10056.3	453885
Q6AXM7|HBS1L_RAT;tr|A0A0G2K2P6|A0A0G2K2P6_RAT	1	1	32.25	0.363301	0.999949	20.3754	74774.2	HBS1-like protein OS=Rattus norvegicus OX=10116 GN=Hbs1l PE=1 SV=1	422.389	0	14.7862	520.194	23.1105	35.0101	0	1115.91	1004.51	36.7143	18429.8	104.103
tr|D3ZDR2|D3ZDR2_RAT	1	1	54.21	0.363468	0.999949	2.27726	23288.4	Charged multivesicular body protein 6 OS=Rattus norvegicus OX=10116 GN=Chmp6 PE=1 SV=1	14825.3	5962.17	57617.1	2143.37	120443	19344.7	3687.8	2410.94	19844.2	1943.34	55770.4	13097.8
P22062|PIMT_RAT	5	4	268.9	0.363578	0.999949	1.18394	24641.4	Protein-L-isoaspartate(D-aspartate) O-methyltransferase OS=Rattus norvegicus OX=10116 GN=Pcmt1 PE=1 SV=2	489896	528089	756616	354993	311056	633937	552471	393906	798818	544545	133022	174140
tr|D4ABK1|D4ABK1_RAT	9	8	513.26	0.363854	0.999949	2.45396	21369.6	Synaptogyrin 3 OS=Rattus norvegicus OX=10116 GN=Syngr3 PE=1 SV=1	2.39435e+06	2.40719e+06	183356	4.98877e+06	70730.1	327681	946168	253158	359733	2.5446e+06	103191	19816
tr|Q6QI75|Q6QI75_RAT	1	1	22.28	0.36411	0.999949	1.10968	99971.9	LRRG00133 OS=Rattus norvegicus OX=10116 GN=Wdr55 PE=1 SV=1	370656	110681	383636	174023	292552	405241	405725	198492	730309	117047	31147.2	82413
Q62812|MYH9_RAT;tr|G3V6P7|G3V6P7_RAT	6	2	229.48	0.364226	0.999949	1.11473	226336	Myosin-9 OS=Rattus norvegicus OX=10116 GN=Myh9 PE=1 SV=3	528.609	3180.16	11542.2	102.305	7333.2	131.639	5516.55	789.184	772.146	1929.91	7422.76	9005.63
P82808|GFPT1_RAT;tr|A0A0G2KB56|A0A0G2KB56_RAT	1	1	52.01	0.36454	0.999949	82.5323	76827.3	Glutamine--fructose-6-phosphate aminotransferase [isomerizing] 1 OS=Rattus norvegicus OX=10116 GN=Gfpt1 PE=1 SV=3	0	0	0	23.2827	84.6356	0	26.8746	0	0.00612025	0	8639.67	240.196
P60522|GBRL2_RAT	3	3	76.27	0.364816	0.999949	1.51619	13666.8	Gamma-aminobutyric acid receptor-associated protein-like 2 OS=Rattus norvegicus OX=10116 GN=Gabarapl2 PE=3 SV=1	227047	111144	50865.9	199960	127014	701007	131479	370380	211841	187217	16991	16694.3
tr|F1LPS8|F1LPS8_RAT	9	8	384.6	0.364956	0.999949	1.15041	31903.6	Transcriptional activator protein Pur-alpha OS=Rattus norvegicus OX=10116 GN=Pura PE=1 SV=3	256400	257170	313996	384091	161124	257468	206120	315612	473489	265429	29171.5	127280
O35964|SH3G1_RAT	4	1	124.81	0.364976	0.999949	4.98515	41492	Endophilin-A2 OS=Rattus norvegicus OX=10116 GN=Sh3gl1 PE=1 SV=1	316.955	2291.5	5068.11	35.3913	12.099	695.223	6574.66	145.321	96.9054	2765.06	32095.2	294.255
tr|F7EMB2|F7EMB2_RAT;tr|Q6QI16|Q6QI16_RAT	3	3	104.08	0.364984	0.999949	1.58628	28170.2	RNA transcription, translation and transport factor protein OS=Rattus norvegicus OX=10116 GN=Rtraf PE=1 SV=1	1464.42	2079.03	8216.3	801.289	7491.48	29594.9	3724.28	210.956	944.371	3561.03	22331.2	526.232
tr|D3ZJF8|D3ZJF8_RAT	1	1	22.93	0.365314	0.999949	3.27999	275161	Fc fragment of IgG-binding protein OS=Rattus norvegicus OX=10116 GN=Fcgbp PE=1 SV=3	548506	139363	416090	109705	243168	89157.1	289538	998383	3.30499e+06	210928	196763	70226.5
tr|A0A140TAI1|A0A140TAI1_RAT	6	2	293.39	0.365573	0.999949	4.93006	62014.5	Ubiquilin 1, isoform CRA_a OS=Rattus norvegicus OX=10116 GN=Ubqln1 PE=1 SV=1	204.161	62.5829	218.186	782.408	2334.99	62.0371	0.595005	105.907	19.9189	0.415247	17130.4	808.297
P0C1X8|AAK1_RAT;tr|F1LRI7|F1LRI7_RAT	14	14	700.97	0.36565	0.999949	2.08659	103760	AP2-associated protein kinase 1 OS=Rattus norvegicus OX=10116 GN=Aak1 PE=1 SV=1	38479.1	40592.7	7233.35	3246.76	104457	82863.2	25355.5	2708.36	1701.47	53820.5	34141.2	14964.4
tr|B2GUZ9|B2GUZ9_RAT	14	8	821.65	0.365848	0.999949	1.2131	36776	Fam49b protein OS=Rattus norvegicus OX=10116 GN=Fam49b PE=1 SV=1	699768	367955	506416	1.06328e+06	255131	628070	755262	524074	992823	422238	38031.9	169743
tr|D3ZYD7|D3ZYD7_RAT	1	1	26.95	0.366089	0.999949	1.55441	173897	Coiled coil domain-containing 88A OS=Rattus norvegicus OX=10116 GN=Ccdc88a PE=1 SV=3	2415.95	53.3021	3989.5	712.497	227.205	0	108.073	0	0	10.8662	104.192	11277.1
tr|B0BNJ9|B0BNJ9_RAT	1	1	31.72	0.366346	0.999949	6.69122	11657.7	RCG44002, isoform CRA_a OS=Rattus norvegicus OX=10116 GN=Tmem14c PE=1 SV=1	119917	186241	155200	5.898e+06	62434	1.3491e+06	82918.1	313817	307095	158418	195984	103126
Q07205|IF5_RAT	2	2	80.14	0.366755	0.999949	6.24198	48954.5	Eukaryotic translation initiation factor 5 OS=Rattus norvegicus OX=10116 GN=Eif5 PE=1 SV=1	79.7729	1211.32	12022.3	227.989	82.9813	375.424	3630.22	169.112	119.628	673.65	80316.9	2476.93
P19643|AOFB_RAT	19	14	872.7	0.367526	0.999949	1.49064	58458.8	Amine oxidase [flavin-containing] B OS=Rattus norvegicus OX=10116 GN=Maob PE=1 SV=3	711150	651498	707634	1.0695e+06	2.4431e+06	2.9368e+06	661920	869400	1.37439e+06	901973	202702	1.70508e+06
tr|A0A096MJ90|A0A096MJ90_RAT;tr|B5DFM3|B5DFM3_RAT;tr|F1LNW6|F1LNW6_RAT	8	8	443.04	0.368165	0.999949	3.99876	13181.2	Lymphocyte antigen 6 family member H (Fragment) OS=Rattus norvegicus OX=10116 GN=Ly6h PE=4 SV=6	49887.5	4580.5	35065.7	2.16593e+06	3.18257e+06	2.52444e+06	6550.33	113002	486196	3317.48	16880.4	1.36529e+06
Q63046|RUNX1_RAT;tr|A0A0G2JYQ4|A0A0G2JYQ4_RAT	1	1	23.99	0.368227	0.999949	1.38275	48556.5	Runt-related transcription factor 1 OS=Rattus norvegicus OX=10116 GN=Runx1 PE=1 SV=1	70040.7	87557.9	57815.7	86439.4	30912.8	37033.9	119383	158919	35410.5	62618.5	50635.8	84373.2
Q62639|RHEB_RAT	5	4	202.7	0.368313	0.999949	1.96829	20479.4	GTP-binding protein Rheb OS=Rattus norvegicus OX=10116 GN=Rheb PE=1 SV=1	140273	71834.5	132706	58460.6	18802	65672.8	87288.4	206202	425253	106997	115299	18992.8
tr|A0A0G2JW21|A0A0G2JW21_RAT;tr|F1LQI2|F1LQI2_RAT	6	4	226.97	0.369212	0.999949	1.32526	179053	Roundabout homolog 1 OS=Rattus norvegicus OX=10116 GN=Robo1 PE=1 SV=1	0.143071	11206.3	8290.28	4.05747	16343.5	3.93446	9349.19	611.069	177.61	8655.73	40.9993	8215.27
Q6IUR5|NENF_RAT	5	5	206.08	0.369518	0.999949	1.52426	18991.6	Neudesin OS=Rattus norvegicus OX=10116 GN=Nenf PE=1 SV=1	175654	241264	349635	1.02829e+06	718646	529060	282892	245029	424476	249944	286608	507130
tr|D4ACK7|D4ACK7_RAT	1	1	40.2	0.369562	0.999949	7.91152	76245.4	Cyclin and CBS domain divalent metal cation transport mediator 3 OS=Rattus norvegicus OX=10116 GN=Cnnm3 PE=1 SV=1	2606.34	33.1943	1122.06	413.929	870.519	0	1421.63	717.504	40.6313	275.114	37124.4	342.626
tr|Q5M949|Q5M949_RAT	1	1	41.05	0.369585	0.999949	2.72618	28340.3	Nipsnap homolog 3A (C. elegans) OS=Rattus norvegicus OX=10116 GN=Nipsnap3b PE=1 SV=1	112115	20502.5	5373.39	3044.63	27569	18643	20318.6	13633.8	10875.9	16133.5	2117.1	5606
tr|F1LUT4|F1LUT4_RAT	36	32	1695.36	0.369659	0.999949	1.55984	110954	Phospholipid-transporting ATPase OS=Rattus norvegicus OX=10116 GN=Atp8a1 PE=1 SV=3	529008	1.03183e+06	616018	2.27687e+06	199838	1.25505e+06	1.05644e+06	809589	612284	1.0303e+06	186175	93169.1
tr|A0A0G2JU25|A0A0G2JU25_RAT;tr|B5DF50|B5DF50_RAT	3	3	139.37	0.36996	0.999949	3.57274	61854.3	Polypeptide N-acetylgalactosaminyltransferase OS=Rattus norvegicus OX=10116 GN=Galnt2 PE=1 SV=1	814.254	2424.23	15270.8	1662.44	1988.12	30295.3	5871.16	2052.44	1995.42	3494.22	121809	52186.3
tr|D4A9Q5|D4A9Q5_RAT	3	3	82.92	0.370027	0.999949	5.30263	50320.6	Carboxypeptidase M OS=Rattus norvegicus OX=10116 GN=Cpm PE=1 SV=1	118.767	173.778	4303.57	271.762	857.652	142.253	936.556	270.305	73.4834	777.479	27043.2	2013.64
tr|A0A0G2JZD5|A0A0G2JZD5_RAT;tr|C6JUQ2|C6JUQ2_RAT;tr|D3ZAL7|D3ZAL7_RAT	2	2	83.77	0.370206	0.999949	26.4385	79566.6	GRB2-associated-binding protein 1 OS=Rattus norvegicus OX=10116 GN=Gab1 PE=1 SV=1	24.1493	59.679	230.504	17.1094	54.0489	43.3072	897.372	18.5742	30.8878	2.26181	7124.14	3263.56
tr|D4A4Q4|D4A4Q4_RAT	2	2	69.23	0.37105	0.999949	3.38722	14682.1	OCIA domain-containing 2 OS=Rattus norvegicus OX=10116 GN=Ociad2 PE=1 SV=3	1623.48	590.031	3616.49	1927.99	386.112	241.807	1112.43	4740.3	2921.06	729.193	18682.5	219.552
D3Z8L7|RRAS_RAT	4	2	156.01	0.371375	0.999949	1.64813	23909.1	Ras-related protein R-Ras OS=Rattus norvegicus OX=10116 GN=Rras PE=1 SV=1	49795.9	32473.6	61090.2	5017.89	4807.25	14955.9	37027.4	54706.4	73398.4	37013.4	71430.2	3542.48
P31596|EAA2_RAT	58	4	3190.48	0.3714	0.999949	3.1423	62106.4	Excitatory amino acid transporter 2 OS=Rattus norvegicus OX=10116 GN=Slc1a2 PE=1 SV=2	928909	52191.4	19213.9	364767	1.11232e+06	1.72933e+06	36137.3	304634	305827	68700.2	28878.6	594564
tr|B2RYI6|B2RYI6_RAT;tr|E9PU13|E9PU13_RAT	4	2	163.61	0.371932	0.999949	2.68363	51941.9	Snx4 protein OS=Rattus norvegicus OX=10116 GN=Snx4 PE=2 SV=1	4658.31	3203.07	733.345	11635.5	4752.8	75.9885	1075.1	8000.82	4524.15	1629.34	49329.6	2689.98
P41542|USO1_RAT	6	6	218.36	0.37206	0.999949	1.73787	107162	General vesicular transport factor p115 OS=Rattus norvegicus OX=10116 GN=Uso1 PE=1 SV=1	29520.6	30650.4	44351.1	4207.11	104120	62040.2	32439.3	13174.1	720.025	29294.6	26975.4	55572.9
tr|D4A305|D4A305_RAT	1	1	49.92	0.372096	0.999949	5.13679	16690.2	Coiled-coil domain-containing protein 58 OS=Rattus norvegicus OX=10116 GN=Ccdc58 PE=1 SV=1	169.181	3961.91	13991.6	587.133	139.074	727.176	10210.5	233.161	101.14	1800.83	32801.2	55411.3
O35244|PRDX6_RAT	16	12	1061.62	0.372698	0.999949	1.3886	24818.6	Peroxiredoxin-6 OS=Rattus norvegicus OX=10116 GN=Prdx6 PE=1 SV=3	1.44314e+06	613549	1.15466e+06	25115.4	22189.5	415069	874495	1.31223e+06	1.76789e+06	705763	371357	69610.2
Q4FZU8|RIPR1_RAT;tr|A0A0G2JVR9|A0A0G2JVR9_RAT	1	1	26.51	0.373135	0.999949	22.9344	131731	Rho family-interacting cell polarization regulator 1 OS=Rattus norvegicus OX=10116 GN=Ripor1 PE=1 SV=2	687.67	52.0848	28.9789	0	184.372	159.818	26.7564	160.822	86.3588	20.8547	24935.9	293.597
O88761|PSMD1_RAT;tr|A0A0G2JTW5|A0A0G2JTW5_RAT;tr|G3V8B6|G3V8B6_RAT	10	10	418.51	0.373533	0.999949	3.23571	105748	26S proteasome non-ATPase regulatory subunit 1 OS=Rattus norvegicus OX=10116 GN=Psmd1 PE=1 SV=1	367107	311327	616737	282674	233222	6.56844e+06	180386	201265	1.20674e+06	331752	544865	124691
Q2HWF0|FBP1L_RAT	1	1	34.87	0.374692	0.999949	232.272	69974.5	Formin-binding protein 1-like OS=Rattus norvegicus OX=10116 GN=Fnbp1l PE=1 SV=2	0	0	0	43.4486	0	0	0	0	62.7933	0	10029.1	0
P59649|FXYD7_RAT	2	1	69.52	0.374733	0.999949	1.97577	8486.8	FXYD domain-containing ion transport regulator 7 OS=Rattus norvegicus OX=10116 GN=Fxyd7 PE=1 SV=1	47007	34085.5	19308.7	2753.15	28967.9	322922	7396.18	2885.33	3365.96	16038.8	171661	28964.7
O70597|PX11A_RAT	1	1	34.48	0.374983	0.999949	1.05234	27922.6	Peroxisomal membrane protein 11A OS=Rattus norvegicus OX=10116 GN=Pex11a PE=1 SV=1	0	5964.84	6642.49	0.817095	9098.81	75.1039	8814.51	344.61	45.631	7037.72	218.884	6460.79
P62959|HINT1_RAT;tr|D4A269|D4A269_RAT	3	2	132.81	0.375352	0.999949	1.65911	13776.9	Adenosine 5'-monophosphoramidase HINT1 OS=Rattus norvegicus OX=10116 GN=Hint1 PE=1 SV=5	3414.66	21827.1	45778.8	3537.77	82215.9	1437.44	48306.8	7435.44	3354.59	18453.3	111788	73153.3
P47861|SYT5_RAT	8	3	292.9	0.37542	0.999949	1.76398	43126.8	Synaptotagmin-5 OS=Rattus norvegicus OX=10116 GN=Syt5 PE=1 SV=1	21667.4	13814.5	24732.1	1533.05	7712.74	24298.6	10902.3	10624.6	13109	12332.6	90262.6	28156.6
tr|G3V8Y0|G3V8Y0_RAT	1	1	20.66	0.37617	0.999949	1.35325	7979.37	G protein subunit gamma 13 OS=Rattus norvegicus OX=10116 GN=Gng13 PE=4 SV=1	280800	261780	332201	871123	107226	86884.3	329557	431712	374260	236723	569.714	60774.2
tr|A0A0G2KA88|A0A0G2KA88_RAT	1	1	21.19	0.376371	0.999949	1.35901	163326	Suppressor of glucose, autophagy-associated 1 OS=Rattus norvegicus OX=10116 GN=Soga1 PE=3 SV=1	165.1	74.8098	101.523	2167.58	316.863	190.883	81.1579	524.1	802.567	212.066	2025.9	454.006
tr|D3ZHG4|D3ZHG4_RAT	2	1	90.64	0.376526	0.999949	1.47895	99829.4	Oxysterol-binding protein OS=Rattus norvegicus OX=10116 GN=Osbp2 PE=1 SV=2	52.0013	289.217	6190.73	2.4988	20034.2	14.1916	1271.33	95.199	55.0764	566.745	11677.2	25649.1
P80254|DOPD_RAT;tr|A0A0F7RQJ6|A0A0F7RQJ6_RAT	3	2	89.87	0.376643	0.999949	1.11487	13133.3	D-dopachrome decarboxylase OS=Rattus norvegicus OX=10116 GN=Ddt PE=1 SV=3	18493.8	14560.4	46698.9	96.9984	15366.9	56.2216	43164.9	7575.29	3635.41	13502.1	5979.3	11600
tr|D4ABA9|D4ABA9_RAT	1	1	23.59	0.376866	0.999949	2.39136	125773	Xin actin-binding repeat-containing 1 OS=Rattus norvegicus OX=10116 GN=Xirp1 PE=1 SV=2	1033.68	16903.1	11951.3	120.553	8720.63	416.935	40666.9	3411.69	3816.63	37645.7	290.968	7780.86
P00507|AATM_RAT	32	28	1517.28	0.376968	0.999949	1.28417	47314.3	Aspartate aminotransferase, mitochondrial OS=Rattus norvegicus OX=10116 GN=Got2 PE=1 SV=2	6.08035e+06	6.63442e+06	5.03423e+06	3.4797e+06	4.7834e+06	2.26221e+06	6.79134e+06	5.65896e+06	1.00727e+07	6.27347e+06	2.49399e+06	5.0186e+06
B5MEV3|S52A2_RAT	1	1	29.01	0.377241	0.999949	1.30758	46955.6	Solute carrier family 52, riboflavin transporter, member 2 OS=Rattus norvegicus OX=10116 GN=Slc52a2 PE=2 SV=2	5892.62	4475.2	3530.58	4198.91	1262.56	1499.88	2578.75	951.195	311.967	2754.1	20276.4	403.453
tr|Q4V7D9|Q4V7D9_RAT	4	3	167.54	0.377399	0.999949	1.35887	51645.4	Acid sphingomyelinase-like phosphodiesterase OS=Rattus norvegicus OX=10116 GN=Smpdl3b PE=2 SV=1	367452	456709	114639	94916.5	140517	88355.1	303019	301651	61133	176736	72869.1	13735.3
P54921|SNAA_RAT	19	13	1043.51	0.377931	0.999949	1.34378	33192.7	Alpha-soluble NSF attachment protein OS=Rattus norvegicus OX=10116 GN=Napa PE=1 SV=2	1.07122e+06	1.46132e+06	1.03993e+06	338810	1.34931e+06	1.98803e+06	1.06216e+06	1.15703e+06	1.21644e+06	1.34785e+06	497350	113357
Q9EPF2|MUC18_RAT	2	2	53.38	0.378391	0.999949	1.35792	71327.1	Cell surface glycoprotein MUC18 OS=Rattus norvegicus OX=10116 GN=Mcam PE=1 SV=2	42917.8	63880.3	71261.5	184.927	5610.95	151.002	12412	89155.1	52249.3	88608.5	5646.98	1793.85
tr|D4A105|D4A105_RAT	5	5	165.04	0.379193	0.999949	1.23346	94745.1	Transmembrane protein 63B OS=Rattus norvegicus OX=10116 GN=Tmem63b PE=1 SV=2	134097	71471.4	59919.8	43536.3	176909	454377	128617	119684	489742	174677	118302	128813
tr|A0A0G2K059|A0A0G2K059_RAT;tr|M0RDI5|M0RDI5_RAT	9	8	475.43	0.379409	0.999949	1.03244	36057.4	Calcium uniporter protein OS=Rattus norvegicus OX=10116 GN=Mcu PE=1 SV=1	69507.4	314299	59495.2	50332.7	24606.8	35435.1	11248.5	10747.7	109447	371042	24588.7	9205.48
tr|E9PTV0|E9PTV0_RAT;tr|Q71RR7|Q71RR7_RAT	1	1	39.72	0.380094	0.999949	1.1131	24052.4	Guanylate kinase OS=Rattus norvegicus OX=10116 GN=Guk1 PE=1 SV=2	18.5725	24944.2	177995	20.7786	122343	29.4877	82776.4	249.28	259.292	17938.5	66126.5	194798
tr|D3ZGN2|D3ZGN2_RAT	13	5	699.02	0.380431	0.999949	1.16389	65606.3	Copine 5 OS=Rattus norvegicus OX=10116 GN=Cpne5 PE=1 SV=1	563186	491045	346938	190234	32100	47758.5	443781	643123	27414.7	307292	5927.48	8382.91
tr|A0A0G2JT50|A0A0G2JT50_RAT;tr|M0R4R4|M0R4R4_RAT;tr|M0RD55|M0RD55_RAT	2	1	74.57	0.380593	0.999949	1.98364	48394.8	Growth arrest-specific protein 7 OS=Rattus norvegicus OX=10116 GN=Gas7 PE=4 SV=1	1329.84	100.654	1377.98	462.342	763.042	31474.1	609.6	53.5306	1.6003	51.0817	68577.9	1141.51
Q6MG12|CF136_RAT;tr|G3V628|G3V628_RAT	1	1	39.91	0.38094	0.999949	2.69112	20444.8	Uncharacterized protein C6orf136 homolog OS=Rattus norvegicus OX=10116 PE=2 SV=1	14.5367	50.4015	92.268	14.2053	0	0	23.0681	36.3865	15.4853	1.35291	364.573	20.4234
tr|D4A533|D4A533_RAT	3	3	142.72	0.381589	0.999949	7.10497	69564.5	Transmembrane anterior posterior transformation 1 OS=Rattus norvegicus OX=10116 GN=Tapt1 PE=1 SV=3	20468.3	65357	17420.6	2.56515e+06	213421	285041	98901.3	55794.6	93863.7	75838.4	5981.1	115345
tr|A0A0G2K1A8|A0A0G2K1A8_RAT;tr|A1A5P7|A1A5P7_RAT	1	1	27.77	0.381845	0.999949	1.58418	43666.7	Pleckstrin homology domain-containing A1 OS=Rattus norvegicus OX=10116 GN=Plekha1 PE=4 SV=1	311.042	2854.87	18400.5	4118.93	4500.94	4878.31	10950.4	3602.03	639.37	5240.66	15.5477	1686.27
Q8VHW5|CCG8_RAT;tr|F1M7K7|F1M7K7_RAT	4	3	211.23	0.382678	0.999949	1.46172	43268.8	Voltage-dependent calcium channel gamma-8 subunit OS=Rattus norvegicus OX=10116 GN=Cacng8 PE=1 SV=1	344565	235292	63248.6	443377	474244	302081	350671	132274	310528	211550	43934.6	225438
tr|F1LZ38|F1LZ38_RAT	5	3	213.85	0.382779	0.999949	2.05016	310876	Teneurin transmembrane protein 4 OS=Rattus norvegicus OX=10116 GN=Tenm4 PE=3 SV=2	2807.47	4393.91	5498.23	3323.53	7627.03	611.768	9213.62	2995.63	834.075	4460.22	15934.1	16303.2
tr|F1MA97|F1MA97_RAT	6	6	236.33	0.382932	0.999949	1.2754	183515	Thrombospondin type 1 domain-containing 7A OS=Rattus norvegicus OX=10116 GN=Thsd7a PE=4 SV=3	1741.35	2187.54	6568.15	4967.5	23136.5	1532.8	4051.15	67.4201	4.38821	2955.56	14083.8	30024.3
P50123|AMPE_RAT;tr|A0A0G2JTI8|A0A0G2JTI8_RAT	2	2	49.21	0.383139	0.999949	1.57567	107995	Glutamyl aminopeptidase OS=Rattus norvegicus OX=10116 GN=Enpep PE=1 SV=2	206.31	10916.4	6639.37	854.687	14587.4	2303.02	9755.26	749.13	9287.78	2529.82	22626.6	10999.2
O35795|ENTP2_RAT;tr|F1M7N2|F1M7N2_RAT;tr|Q5RJP4|Q5RJP4_RAT	5	4	253.54	0.383595	0.999949	1.18472	54389.6	Ectonucleoside triphosphate diphosphohydrolase 2 OS=Rattus norvegicus OX=10116 GN=Entpd2 PE=1 SV=1	622779	747149	403755	358489	129564	72403.4	77052.5	602421	463731	772114	12639	42239.3
B2RYW9|FAHD2_RAT	4	3	170.19	0.383675	0.999949	1.43238	34581.3	Fumarylacetoacetate hydrolase domain-containing protein 2 OS=Rattus norvegicus OX=10116 GN=Fahd2 PE=1 SV=1	134350	175643	78481.3	31703.7	6775.84	12972.4	142251	156815	140100	144757	14660.1	31559.3
tr|D3ZH14|D3ZH14_RAT	1	1	20.13	0.383909	0.999949	7.5528	71680.4	Transmembrane and coiled-coil domain family 1 OS=Rattus norvegicus OX=10116 GN=Tmcc1 PE=1 SV=1	39.6153	1463.64	12419.9	142.135	5574.46	101.894	4918.58	24.9124	667.078	1691.63	128452	13350.6
Q7TT49|MRCKB_RAT	10	8	377.29	0.384499	0.999949	3.99558	194886	Serine/threonine-protein kinase MRCK beta OS=Rattus norvegicus OX=10116 GN=Cdc42bpb PE=1 SV=1	2282.69	572.198	16662.6	2333.86	1999.66	2106.15	763.776	3840.69	1582.07	5069.13	84131.4	8326.94
P97546|NPTN_RAT	34	29	1882.67	0.385214	0.999949	1.16434	43931.8	Neuroplastin OS=Rattus norvegicus OX=10116 GN=Nptn PE=1 SV=2	4.29825e+06	4.43091e+06	3.02833e+06	1.08683e+06	3.98233e+06	2.88683e+06	4.19356e+06	4.44419e+06	4.6279e+06	2.87314e+06	372802	419486
P16232|DHI1_RAT;tr|Q6TUH9|Q6TUH9_RAT;tr|Q8CIY7|Q8CIY7_RAT	2	1	83.99	0.385296	0.999949	1.08574	31883.3	Corticosteroid 11-beta-dehydrogenase isozyme 1 OS=Rattus norvegicus OX=10116 GN=Hsd11b1 PE=1 SV=2	1081.72	94.8719	54.1577	6748.74	403.577	1631.05	771.765	4112.29	987.424	2133.38	843.58	374.844
tr|F1M820|F1M820_RAT;tr|F1M840|F1M840_RAT;tr|F1M865|F1M865_RAT;tr|F1M866|F1M866_RAT	2	1	57.13	0.385404	0.999949	37.9972	143367	Sorbin and SH3 domain-containing protein 1 OS=Rattus norvegicus OX=10116 GN=Sorbs1 PE=1 SV=1	15.3332	2.7638	252.016	0.0686387	1.12843	0.073171	12.2387	1.86555	4.68261	5.62313	10283.2	4.19421
tr|A0A0G2K761|A0A0G2K761_RAT	4	4	135.84	0.38561	0.999949	1.27039	86969	Cullin 2 OS=Rattus norvegicus OX=10116 GN=Cul2 PE=1 SV=1	8505.66	2856.56	6288.84	2652.87	28519.7	6374.46	5985.31	253.956	99.7293	2056.6	42044.1	19683.6
Q68FR2|BIN2_RAT	4	3	139.28	0.386062	0.999949	1.5182	55118.4	Bridging integrator 2 OS=Rattus norvegicus OX=10116 GN=Bin2 PE=1 SV=1	1998.98	561.842	2361.32	1123.37	31799.3	4984.56	869.916	164.035	293.979	398.434	7859.26	18625
P80432|COX7C_RAT	1	1	30.7	0.386592	0.999949	9.68769	7374.7	Cytochrome c oxidase subunit 7C, mitochondrial OS=Rattus norvegicus OX=10116 GN=Cox7c PE=1 SV=2	12997.3	12444.9	18669.7	22320	19142.6	4226.6	18983.7	24174.3	2336.55	12644.4	767741	44085.4
tr|B5DEQ0|B5DEQ0_RAT	2	2	96.88	0.38675	0.999949	1.38687	20021	Translocon-associated protein subunit beta OS=Rattus norvegicus OX=10116 GN=Ssr2 PE=1 SV=1	266593	756524	64188.9	19848.1	37258.7	34183.1	427169	330094	104614	647591	103816	21273.9
tr|Q2I6B1|Q2I6B1_RAT	15	7	502.87	0.387172	0.999949	1.73148	98041.2	V-type proton ATPase subunit a OS=Rattus norvegicus OX=10116 GN=Atp6v0a2 PE=1 SV=1	469277	637162	544402	199230	89503.8	36177.4	647099	1.10519e+06	451942	957862	58646.2	200237
P29315|RINI_RAT;tr|E2RUH2|E2RUH2_RAT	8	6	350.67	0.387341	0.999949	1.28034	49974.5	Ribonuclease inhibitor OS=Rattus norvegicus OX=10116 GN=Rnh1 PE=1 SV=2	625.335	18103.4	19912.6	1150.41	57205.2	430.291	9452.96	1469.19	3912.25	14115.2	60905.6	34884.4
P12368|KAP2_RAT	6	5	274.73	0.387512	0.999949	1.06345	45480.3	cAMP-dependent protein kinase type II-alpha regulatory subunit OS=Rattus norvegicus OX=10116 GN=Prkar2a PE=1 SV=4	30863	17887.1	164434	2862.91	4411.88	3341.91	30255.1	19861.3	6311.54	23188.7	138493	19892.6
A0A096MJZ0|DNAL1_RAT	1	1	35.04	0.387586	0.999949	28.9686	21502.9	Dynein axonemal light chain 1 OS=Rattus norvegicus OX=10116 GN=Dnal1 PE=1 SV=1	1286.42	0	123.267	2345.44	96.3822	1106.14	106.844	1628.23	51.5838	13683.3	128114	32.0293
Q7TMB7|PLPR4_RAT;tr|G3V864|G3V864_RAT	8	6	368.98	0.387684	0.999949	2.36694	83361.5	Phospholipid phosphatase-related protein type 4 OS=Rattus norvegicus OX=10116 GN=Plppr4 PE=1 SV=1	3.75751e+06	1.63407e+06	1.52717e+06	1.34624e+06	3.68466e+06	6497.76	1.85617e+06	28042.5	9571.51	1.33376e+06	180283	1.64347e+06
Q64244|CD38_RAT	3	3	120.52	0.387853	0.999949	2.82728	34435.9	ADP-ribosyl cyclase/cyclic ADP-ribose hydrolase 1 OS=Rattus norvegicus OX=10116 GN=Cd38 PE=1 SV=1	9781.84	94320.3	7441.51	71858.9	3019.87	14616.1	75676.2	264817	2728.81	91244.6	128536	5389.93
Q6P6T4|EMAL2_RAT	1	1	23.77	0.388341	0.999949	2.01392	70710.7	Echinoderm microtubule-associated protein-like 2 OS=Rattus norvegicus OX=10116 GN=Eml2 PE=1 SV=1	488.443	93.6126	1763.13	2016.87	3204.52	6470.81	785.51	641.812	164.982	42.3528	2443.9	2891.61
P63081|VATL_RAT	23	21	1224.98	0.388785	0.999949	1.74175	15807.9	V-type proton ATPase 16 kDa proteolipid subunit OS=Rattus norvegicus OX=10116 GN=Atp6v0c PE=1 SV=1	3.138e+06	2.76989e+06	1.48529e+06	1.64336e+07	479921	1.72494e+07	2.53818e+06	5.59893e+06	1.35285e+07	1.76563e+06	103691	323956
tr|Q3MID6|Q3MID6_RAT	7	5	253.22	0.389191	0.999949	1.53648	37147.8	Calumenin OS=Rattus norvegicus OX=10116 GN=Calu PE=1 SV=1	62145.2	17874.8	72168.9	6028.33	27071.9	43968.2	10227.6	7284.8	67122.6	11761.3	34921.4	17892
P35284|RAB12_RAT;tr|D4A376|D4A376_RAT	3	2	129.06	0.389195	0.999949	3.05447	27271.5	Ras-related protein Rab-12 OS=Rattus norvegicus OX=10116 GN=Rab12 PE=1 SV=2	35.8788	1582.93	10389.3	35.1187	3198.69	415.28	4760.64	462.135	65.1114	1071.72	34973.8	6491.12
O35814|STIP1_RAT	12	11	536.66	0.389462	0.999949	1.1857	62570.2	Stress-induced-phosphoprotein 1 OS=Rattus norvegicus OX=10116 GN=Stip1 PE=1 SV=1	147981	67269.8	193998	24196.4	227941	193542	113770	191610	270204	96970.1	163202	177930
tr|F1MAK3|F1MAK3_RAT	4	4	155.23	0.389887	0.999949	1.44634	231192	Rho GTPase-activating protein 32 OS=Rattus norvegicus OX=10116 GN=Arhgap32 PE=1 SV=2	0	2004.02	16493.5	1.39764	3021.26	2.40356	6793.55	45.0428	7.47744	886.347	3205.07	3943.28
Q62768|UN13A_RAT;tr|F1M378|F1M378_RAT	3	3	88.61	0.390781	0.999949	2.81655	196355	Protein unc-13 homolog A OS=Rattus norvegicus OX=10116 GN=Unc13a PE=1 SV=1	5182.85	1572.62	5555.26	785.517	12358.1	61.5599	4392.83	7093.81	52747	352.713	2309.69	4970.89
tr|B1WBY1|B1WBY1_RAT	6	6	184.45	0.391095	0.999949	1.9016	89691.4	Cul1 protein OS=Rattus norvegicus OX=10116 GN=Cul1 PE=1 SV=1	9329.44	4777.39	28637	19508.3	4316.37	101413	1645.19	10415.5	10164.7	2845.87	53611.1	9654.43
O35458|VIAAT_RAT	11	11	463.33	0.391707	0.999949	1.25548	57407.2	Vesicular inhibitory amino acid transporter OS=Rattus norvegicus OX=10116 GN=Slc32a1 PE=1 SV=1	680223	1.15657e+06	662049	827583	2.96408e+06	220925	951069	632672	2.74787e+06	1.42818e+06	643444	1.77173e+06
D3ZTV3|FLRT2_RAT	2	2	54.28	0.392453	0.999949	48.5044	73873.7	Leucine-rich repeat transmembrane protein FLRT2 OS=Rattus norvegicus OX=10116 GN=Flrt2 PE=1 SV=1	6.55203	18.6637	203.557	0	6.93091	107.211	56.3927	30.1875	1.2134	17.2572	16474	53.8584
P29994|ITPR1_RAT;tr|A0A0A0MY31|A0A0A0MY31_RAT;tr|A0A0G2KAH9|A0A0G2KAH9_RAT;tr|C7E1V2|C7E1V2_RAT;tr|F1LNT1|F1LNT1_RAT;tr|F1LQX8|F1LQX8_RAT	19	10	856.5	0.392466	0.999949	2.26741	313263	Inositol 1,4,5-trisphosphate receptor type 1 OS=Rattus norvegicus OX=10116 GN=Itpr1 PE=1 SV=2	152027	194580	132855	188902	248908	77470.8	185931	419182	986186	169791	34691.2	459705
P05508|NU4M_RAT;tr|A7XYB9|A7XYB9_RAT;tr|D2E6K0|D2E6K0_RAT;tr|Q06Q89|Q06Q89_RAT;tr|Q06QA2|Q06QA2_RAT;tr|Q06QE1|Q06QE1_RAT;tr|Q06QG7|Q06QG7_RAT;tr|Q35737|Q35737_RAT;tr|Q7HKW3|Q7HKW3_RAT;tr|Q8HIC6|Q8HIC6_RAT	3	3	114.12	0.392709	0.999949	1.83753	51782.9	NADH-ubiquinone oxidoreductase chain 4 OS=Rattus norvegicus OX=10116 GN=Mtnd4 PE=3 SV=3	240297	318788	165451	30394.2	13431.4	42802.4	307191	345936	320845	369928	137798	8838.93
Q8K3E7|DPY30_RAT;tr|G3V946|G3V946_RAT	1	1	24.85	0.393654	0.999949	2.13371	11200.6	Protein dpy-30 homolog OS=Rattus norvegicus OX=10116 GN=Dpy30 PE=1 SV=1	2829.66	3428.86	50304.3	20365.2	20611.4	49767.9	1378.26	19481.2	21788.5	3661.09	9584.95	13144.2
tr|A0A0G2JVP5|A0A0G2JVP5_RAT;tr|B2RZ22|B2RZ22_RAT;tr|D3ZZF8|D3ZZF8_RAT	1	1	41.92	0.394064	0.999949	1.4085	45729.8	Poly(A)-binding protein-interacting protein 1 OS=Rattus norvegicus OX=10116 GN=Paip1 PE=1 SV=1	18674.7	13451.7	18136.6	4840.74	40777.5	9734.16	12795.6	15523.2	468.801	17127.7	21130.1	7939
P97576|GRPE1_RAT;tr|A0A0G2JZA2|A0A0G2JZA2_RAT	2	2	62.88	0.394426	0.999949	1.52031	24297	GrpE protein homolog 1, mitochondrial OS=Rattus norvegicus OX=10116 GN=Grpel1 PE=1 SV=2	1.37273	20752.7	22820	48.0601	15832.9	633.214	41168.6	394.939	406.185	8475.45	2758.16	38149.1
tr|V9GZ87|V9GZ87_RAT	2	2	76.24	0.394446	0.999949	1.31491	9223.49	CDC42 small effector 2-like OS=Rattus norvegicus OX=10116 GN=LOC100362023 PE=1 SV=1	327.879	2192.23	1576.72	35.484	15576.2	10.6677	5858.26	75.6046	1714.74	1045.12	1734.15	4568.7
tr|D3ZLU1|D3ZLU1_RAT	1	1	26.37	0.394558	0.999949	11.1479	74667.9	Exostoses (Multiple)-like 1 (Predicted) OS=Rattus norvegicus OX=10116 GN=Extl1 PE=3 SV=1	67.356	17.6105	505.101	256.145	0	455.456	92.6102	548.993	405.56	24.0213	13425	14.6468
P0DSP1|SORL_RAT	28	24	1189.29	0.394699	0.999949	2.00447	247314	Sortilin-related receptor OS=Rattus norvegicus OX=10116 GN=Sorl1 PE=1 SV=1	161910	179982	56960.3	418689	114135	343790	214446	385733	1.46413e+06	245174	77874.3	169283
tr|F1M8K0|F1M8K0_RAT	4	3	185.49	0.396361	0.999949	1.0935	96706.4	Alpha-dystroglycan OS=Rattus norvegicus OX=10116 GN=Dag1 PE=1 SV=1	227815	232820	222151	396590	201539	314453	448196	334626	244331	323539	58945.9	49323
tr|Q0H8V1|Q0H8V1_RAT;tr|Q6AXW3|Q6AXW3_RAT	1	1	27.45	0.396383	0.999949	35.8255	41241.4	DNAJC18 OS=Rattus norvegicus OX=10116 GN=Dnajc18 PE=2 SV=1	0	448.086	760.595	0.315622	90.7519	10.8075	2662.65	0.424896	4.54976	55.0327	43857.5	371.218
tr|D3ZZK3|D3ZZK3_RAT	12	5	490.09	0.397155	0.999949	3.37855	109838	Receptor protein-tyrosine kinase OS=Rattus norvegicus OX=10116 GN=Epha4 PE=4 SV=1	7780.82	15635.6	8579.67	8614.26	42270.4	22562.5	41505.6	5995.1	164155	7345.78	7910.29	129335
Q792I0|LIN7C_RAT	5	4	164.61	0.398321	0.999949	1.13329	21834	Protein lin-7 homolog C OS=Rattus norvegicus OX=10116 GN=Lin7c PE=1 SV=1	399877	422118	691931	314021	391755	530463	409241	733758	599250	379974	117577	186899
tr|D3ZM22|D3ZM22_RAT	1	1	34.19	0.398598	0.999949	827.452	55034.1	RCG46279 OS=Rattus norvegicus OX=10116 GN=Slc41a1 PE=1 SV=2	0	0	24.3208	0	0	0	0	0	0	0	20113.2	11.0791
Q62717|CAPS1_RAT	16	1	727.59	0.399381	0.999949	1.41336	146266	Calcium-dependent secretion activator 1 OS=Rattus norvegicus OX=10116 GN=Cadps PE=1 SV=1	519659	384797	188498	98571.1	490128	158193	419771	265975	449529	417284	118341	929465
Q5FWU3|ATG9A_RAT	3	3	121.6	0.400467	0.999949	1.66955	94488.3	Autophagy-related protein 9A OS=Rattus norvegicus OX=10116 GN=Atg9a PE=1 SV=1	7832.96	19638	17916.5	21899	22045.8	27974.5	26348.9	5612.38	48313.1	22694.1	27504.4	65376.8
Q9QX69|LANC1_RAT	4	3	197.82	0.400934	0.999949	1.39364	45240	Glutathione S-transferase LANCL1 OS=Rattus norvegicus OX=10116 GN=Lancl1 PE=1 SV=2	361202	267132	253420	30567.4	7909.72	96614.7	381033	361535	329810	243755	60063.5	40923
Q62897|KCND3_RAT;tr|A0A0G2JSN5|A0A0G2JSN5_RAT;tr|A0A0G2JSW5|A0A0G2JSW5_RAT;tr|D3ZYK3|D3ZYK3_RAT	1	1	27.78	0.401036	0.999949	1.71499	73513.4	Potassium voltage-gated channel subfamily D member 3 OS=Rattus norvegicus OX=10116 GN=Kcnd3 PE=1 SV=2	0	3798.39	5004.73	18.043	7.65557	22.0542	121.108	126.808	521.985	72.5976	14304.9	31.7854
P37136|ACES_RAT;tr|A0A0G2K6V0|A0A0G2K6V0_RAT;tr|M0R4A5|M0R4A5_RAT;tr|Q505J2|Q505J2_RAT	1	1	47.09	0.40185	0.999949	3.28766	68196.6	Acetylcholinesterase OS=Rattus norvegicus OX=10116 GN=Ache PE=2 SV=1	12935.3	3480.35	915.117	10867.7	6353	99326.4	6683.41	2900.21	711.08	1745.83	8620.98	20059.8
tr|D3ZCI5|D3ZCI5_RAT	1	1	40.11	0.401852	0.999949	1.32248	23671	Syntaxin-binding protein 6 OS=Rattus norvegicus OX=10116 GN=Stxbp6 PE=1 SV=2	363.468	0	44.8165	4612.84	69.1175	71.492	0	0	0	27.0277	6602.78	196.449
tr|D4A585|D4A585_RAT	1	1	22.96	0.40232	0.999949	2.27086	37800.5	H6 family homeobox 3 OS=Rattus norvegicus OX=10116 GN=Hmx3 PE=4 SV=1	301570	278585	258699	1.19115e+06	3.82894e+06	1.68578e+06	244801	484939	614853	352416	316136	1.30926e+06
tr|D3Z9X5|D3Z9X5_RAT;tr|D3ZDM4|D3ZDM4_RAT;tr|F1LTM4|F1LTM4_RAT	1	1	24.35	0.402601	0.999949	31.1072	43181.7	Similar to Na+ dependent glucose transporter 1 (Predicted) OS=Rattus norvegicus OX=10116 GN=RGD1304770 PE=4 SV=1	666.443	94.8833	513.384	356.12	0	39.2533	61.3374	117.564	361.722	42.5767	51242.1	126.353
tr|B2RYF6|B2RYF6_RAT	10	9	672.82	0.402819	0.999949	1.53047	75276.6	CLPTM1 regulator of GABA type A receptor forward-trafficking OS=Rattus norvegicus OX=10116 GN=Clptm1 PE=1 SV=1	750913	1.36348e+06	1.05071e+06	850806	2.18322e+06	2.2213e+06	1.21621e+06	2.11544e+06	5.75798e+06	1.21058e+06	812950	1.77408e+06
tr|A0A0G2JSI1|A0A0G2JSI1_RAT	9	8	392.98	0.402862	0.999949	1.56316	54050.2	4-trimethylaminobutyraldehyde dehydrogenase OS=Rattus norvegicus OX=10116 GN=Aldh9a1 PE=1 SV=1	15127.4	111382	56085.3	430183	499195	128628	4947.33	303091	278712	134754	5062.63	67083.1
Q63610|TPM3_RAT	6	4	249.71	0.40331	0.999949	1.23188	29006.6	Tropomyosin alpha-3 chain OS=Rattus norvegicus OX=10116 GN=Tpm3 PE=1 SV=2	13708.7	11310.8	23235.2	3151.26	7785.01	172640	4799.24	6460.24	1500.07	4719.46	165945	4768.35
Q80W98|SGTB_RAT	1	1	37.87	0.403436	0.999949	58.3861	33487.6	Small glutamine-rich tetratricopeptide repeat-containing protein beta OS=Rattus norvegicus OX=10116 GN=Sgtb PE=1 SV=1	0	591.908	383.835	35.7855	5.9505	71.4598	109.91	0	30.6809	466.461	62137.8	834.142
tr|F1M4J1|F1M4J1_RAT	7	6	246.48	0.404151	0.999949	1.19965	115525	Dyslexia susceptibility 2-like OS=Rattus norvegicus OX=10116 GN=LOC100294508 PE=1 SV=2	22577.4	9246.19	12805.6	26930.7	13979.4	126672	7640.95	43648.8	4278.65	3797.41	111672	5856.68
P12785|FAS_RAT	69	62	3389.36	0.404558	0.999949	1.31505	272648	Fatty acid synthase OS=Rattus norvegicus OX=10116 GN=Fasn PE=1 SV=3	282006	201256	155957	317706	570429	1.04045e+06	130830	114576	355057	160127	988704	203340
Q5BJU7|WASF1_RAT	4	3	142.32	0.404623	0.999949	1.26581	61515.1	Wiskott-Aldrich syndrome protein family member 1 OS=Rattus norvegicus OX=10116 GN=Wasf1 PE=1 SV=1	21982	13709.2	17873.2	45018.9	39377.2	26644.1	9977.77	31844.6	30321.3	24063.3	19981.9	13850
tr|A0A0G2K5J5|A0A0G2K5J5_RAT;tr|D4A9F4|D4A9F4_RAT	1	1	43.5	0.404668	0.999949	2.04431	56095.4	Netrin G2 OS=Rattus norvegicus OX=10116 GN=Ntng2 PE=4 SV=1	0	1429.74	11027.1	0	2384.61	238.162	2928.02	22.5404	29.5621	723.701	22485.2	4638.42
P11348|DHPR_RAT	9	8	421.64	0.404879	0.999949	1.15558	25552.2	Dihydropteridine reductase OS=Rattus norvegicus OX=10116 GN=Qdpr PE=1 SV=1	555424	593182	351136	609757	399999	282295	280691	707539	473744	555374	80502.6	318076
tr|F1MAA3|F1MAA3_RAT;tr|Q499R1|Q499R1_RAT	5	4	184.11	0.406695	0.999949	1.09165	69183.9	Serine/threonine-protein phosphatase 2A 56 kDa regulatory subunit OS=Rattus norvegicus OX=10116 GN=Ppp2r5d PE=1 SV=2	950.148	19149.1	42024.8	1340.08	38646.2	1769.8	17480.1	19840.1	1972.53	21545.7	8762.9	43799.8
P85834|EFTU_RAT	7	6	249.67	0.406806	0.999949	1.63768	49522.4	Elongation factor Tu, mitochondrial OS=Rattus norvegicus OX=10116 GN=Tufm PE=1 SV=1	720051	967514	328324	40642.4	7558.04	40283.5	925291	788001	767661	890427	24818.3	50083
tr|M0R9X8|M0R9X8_RAT	108	1	4892.55	0.407041	0.999949	1.34767	532052	Cytoplasmic dynein 1 heavy chain 1 OS=Rattus norvegicus OX=10116 GN=Dync1h1 PE=1 SV=2	870123	654236	2.29006e+06	1.00229e+06	308281	304579	735176	1.19208e+06	1.16575e+06	760201	132308	43341.6
P38650|DYHC1_RAT	107	1	4845.72	0.407044	0.999949	1.34767	532256	Cytoplasmic dynein 1 heavy chain 1 OS=Rattus norvegicus OX=10116 GN=Dync1h1 PE=1 SV=1	1274.97	958.633	3355.56	1468.62	451.715	446.291	1077.23	1746.73	1708.13	1113.9	193.868	63.5072
P60868|RS20_RAT;tr|A0A0G2JY70|A0A0G2JY70_RAT;tr|A0A0G2K6L6|A0A0G2K6L6_RAT;tr|A0A0G2K8W1|A0A0G2K8W1_RAT;tr|A0A0H2UHG7|A0A0H2UHG7_RAT;tr|D3ZZK1|D3ZZK1_RAT;tr|M0R566|M0R566_RAT;tr|M0R5V6|M0R5V6_RAT;tr|M0R987|M0R987_RAT;tr|M0RB28|M0RB28_RAT	2	2	76.81	0.407427	0.999949	1.19309	13372.7	40S ribosomal protein S20 OS=Rattus norvegicus OX=10116 GN=Rps20 PE=3 SV=1	6411.25	31803.6	40414.6	5714.31	602.339	1938.96	5893.24	36254.6	3921.64	17694.6	34025.6	5872.32
O70617|KCJ13_RAT	2	2	63.1	0.407531	0.999949	4.1369	40636.7	Inward rectifier potassium channel 13 OS=Rattus norvegicus OX=10116 GN=Kcnj13 PE=2 SV=1	53.6022	1125.92	19393.9	1105.87	1474.07	1243.56	995.83	1300.67	230.17	1660.52	62991.2	33749.2
P42346|MTOR_RAT;tr|A0A0G2JX74|A0A0G2JX74_RAT	5	5	191.27	0.407572	0.999949	3.7188	288792	Serine/threonine-protein kinase mTOR OS=Rattus norvegicus OX=10116 GN=Mtor PE=1 SV=1	0.0223047	5674.93	10576.1	16.5234	39.6643	124920	338.989	4831.8	11876.1	5881.95	14966.1	81.4581
O88637|PCY2_RAT	1	1	40.34	0.40788	0.999949	20.1089	45220	Ethanolamine-phosphate cytidylyltransferase OS=Rattus norvegicus OX=10116 GN=Pcyt2 PE=1 SV=1	47.2456	1959.62	752.596	12.447	3864.88	182.675	2471.88	14.3261	78.7541	1293.12	128165	5108.98
Q3KRE0|ATAD3_RAT	4	4	124.87	0.408382	0.999949	1.36953	66759	ATPase family AAA domain-containing protein 3 OS=Rattus norvegicus OX=10116 GN=Atad3 PE=1 SV=1	37806.9	112173	31222.5	20040.3	29429.6	5607.73	67867.6	64129.8	48743.5	91316	8131.16	43403.7
tr|C6JUM5|C6JUM5_RAT	6	4	172.28	0.408431	0.999949	1.03745	102104	Protocadherin gamma C5 OS=Rattus norvegicus OX=10116 GN=Pcdhgc5 PE=2 SV=1	965.832	8275.8	9189.55	32.1018	15501.2	341.6	5113.2	1493.03	993.555	6066.53	15039.9	4361.42
D3ZQD3|OGDHL_RAT	7	2	392.05	0.40919	0.999949	1.31922	114637	2-oxoglutarate dehydrogenase-like, mitochondrial OS=Rattus norvegicus OX=10116 GN=Ogdhl PE=1 SV=2	9781.64	1927.51	790.044	262.293	1844.43	21.5536	917.417	1812.3	538.572	1133.35	13172.8	1722.4
Q5BJM8|ZNT7_RAT	3	2	164.2	0.409199	0.999949	1.52575	41773.9	Zinc transporter 7 OS=Rattus norvegicus OX=10116 GN=Slc30a7 PE=2 SV=2	134860	165985	116377	137183	39841.2	67737.5	148296	125858	447138	144701	84313.5	59715.4
P11951|CX6C2_RAT	7	7	268.21	0.4092	0.999949	1.795	8454.93	Cytochrome c oxidase subunit 6C-2 OS=Rattus norvegicus OX=10116 GN=Cox6c2 PE=1 SV=3	2.75048e+06	6.74478e+06	1.74433e+06	477278	208971	624247	4.99128e+06	4.63336e+06	3.44116e+06	8.47785e+06	210631	773120
P19139|CSK21_RAT	5	5	236.77	0.40946	0.999949	1.98664	45073.5	Casein kinase II subunit alpha OS=Rattus norvegicus OX=10116 GN=Csnk2a1 PE=1 SV=2	44008.8	50667.1	51795.3	261247	91810.2	193031	208242	118618	246198	72915.9	28666.6	701222
P63088|PP1G_RAT;tr|A0A0G2JVK2|A0A0G2JVK2_RAT;tr|Q6AYZ4|Q6AYZ4_RAT	9	1	431.58	0.410267	0.999949	1.64301	36983.8	Serine/threonine-protein phosphatase PP1-gamma catalytic subunit OS=Rattus norvegicus OX=10116 GN=Ppp1cc PE=1 SV=1	30234.9	29877.2	31649.2	5434.59	9001.89	3628.96	7081.12	32616.2	59196.5	26122.8	50013.8	5416.28
tr|Q925D6|Q925D6_RAT	2	2	58.05	0.41031	0.999949	3.19766	37444.3	Mitogen-activated protein kinase kinase 6 OS=Rattus norvegicus OX=10116 GN=Map2k6 PE=1 SV=1	43.2411	3336.53	8127.74	4724.22	1507.99	582.543	326.178	6.9955	188.325	178.617	57167.9	720.381
tr|B0K024|B0K024_RAT;tr|G3V7V2|G3V7V2_RAT	2	1	45.51	0.410935	0.999949	2.51356	46031.2	Aamp protein (Fragment) OS=Rattus norvegicus OX=10116 GN=Aamp PE=2 SV=1	2182.84	71.9563	7.96703	0.00220888	1020.71	0.00718517	387.891	117.115	352.28	3.30974	88.4226	357.289
tr|D3ZD84|D3ZD84_RAT;tr|M0RB60|M0RB60_RAT	1	1	26.87	0.410942	0.999949	4.42322	106720	Leucine-rich repeats and immunoglobulin-like domains 1 OS=Rattus norvegicus OX=10116 GN=Lrig1 PE=4 SV=3	1704.43	26.7704	6445.72	1491.77	342.703	1828.78	5.61609	957.36	119.189	2.46617	50705.9	581.106
A6JFQ6|CLVS1_RAT;tr|A0A0G2K5H2|A0A0G2K5H2_RAT;tr|F1LRF3|F1LRF3_RAT	3	3	101.33	0.411039	0.999949	1.75011	40666.5	Clavesin-1 OS=Rattus norvegicus OX=10116 GN=Clvs1 PE=1 SV=1	177499	132274	232683	121108	21681.5	127290	122355	229471	623353	108308	44340.5	294200
Q6AYT3|RTCB_RAT	3	3	137.01	0.41132	0.999949	1.13384	55249.4	RNA-splicing ligase RtcB homolog OS=Rattus norvegicus OX=10116 GN=Rtcb PE=2 SV=1	54171	22890.2	67710.1	1718.41	2144.43	675.937	9188.2	56077.8	18534.8	21291.8	61978	2222.85
Q5U300|UBA1_RAT	35	32	1909.26	0.412481	0.999949	1.06781	117788	Ubiquitin-like modifier-activating enzyme 1 OS=Rattus norvegicus OX=10116 GN=Uba1 PE=1 SV=1	1.69213e+06	985399	1.44313e+06	768140	416421	1.06247e+06	1.31142e+06	1.89683e+06	1.5738e+06	978169	66081.3	137018
Q80U96|XPO1_RAT;tr|Q9WUW7|Q9WUW7_RAT	1	1	22.8	0.412483	0.999949	3.54496	123038	Exportin-1 OS=Rattus norvegicus OX=10116 GN=Xpo1 PE=1 SV=1	3748.11	1074.68	539.244	354.937	381.561	1785.45	37.8855	690.784	294.348	214.996	26650.7	59.6601
tr|A0A0G2K315|A0A0G2K315_RAT;tr|D3ZET9|D3ZET9_RAT;tr|Q91Y79|Q91Y79_RAT	1	1	54.9	0.412911	0.999949	1.76047	125735	Centrosomal protein 170 OS=Rattus norvegicus OX=10116 GN=Cep170 PE=1 SV=1	8.92737	158.373	3961.39	28.198	9192.34	0.0650976	850.08	73.8404	12.6392	130.956	9280.48	13153.1
Q5RJY4|DRS7B_RAT	5	5	246.4	0.412962	0.999949	1.44024	35342	Dehydrogenase/reductase SDR family member 7B OS=Rattus norvegicus OX=10116 GN=Dhrs7b PE=1 SV=1	95936.7	223956	589920	178531	78689.8	37285.2	151776	421303	18953.6	163571	58330.3	22258.8
tr|D4A6X4|D4A6X4_RAT	1	1	51.96	0.413007	0.999949	1.38898	11311.8	Acylphosphatase OS=Rattus norvegicus OX=10116 GN=Acyp1 PE=1 SV=1	190459	45978.3	73429.7	35130.5	329121	40003.5	107893	117836	3467.31	73589.5	8973.68	202375
Q9ET64|NSMA_RAT	2	2	52.84	0.413526	0.999949	1.04408	47644.7	Sphingomyelin phosphodiesterase 2 OS=Rattus norvegicus OX=10116 GN=Smpd2 PE=1 SV=1	29437.8	4632.47	2033.72	7979.83	108887	2254.85	7680.91	14110	9261.68	6932.73	62415.7	61667.4
tr|M0R5T4|M0R5T4_RAT	14	1	726.05	0.413557	0.999949	1.02202	21522	Rac family small GTPase 3 OS=Rattus norvegicus OX=10116 GN=Rac3 PE=4 SV=2	744022	563549	315780	719133	122777	1.41935e+06	841621	544190	1.61796e+06	764096	14006.3	19038.1
tr|D4AAX6|D4AAX6_RAT	2	2	50.41	0.413595	0.999949	3.2316	125790	Phosphoinositide phospholipase C OS=Rattus norvegicus OX=10116 GN=Plch2 PE=1 SV=3	5.23046	4320.67	46506	32.6569	2356.17	129.846	20311.3	13.6813	84.5761	2849.6	97639	51509.6
Q4G074|KBP_RAT;tr|G3V614|G3V614_RAT	1	1	33.98	0.414041	0.999949	1.37819	71296.3	KIF-binding protein OS=Rattus norvegicus OX=10116 GN=Kifbp PE=2 SV=1	611.222	8672.88	27346.3	270.922	10370.2	7404.19	13767.9	3358.45	7434.77	1465.1	15071.5	34255.9
tr|Q66HM2|Q66HM2_RAT	46	1	2368.7	0.414467	0.999949	1.45316	104174	AP-2 complex subunit alpha OS=Rattus norvegicus OX=10116 GN=Ap2a2 PE=1 SV=1	28256	16990.6	12352.1	13522.9	55678.4	52617.3	22141.9	18488	39694.6	15468	8777.55	18896.7
tr|D4A6E6|D4A6E6_RAT	1	1	22.68	0.414542	0.999949	2.13966	39017.4	Heparan-sulfate 6-O-sulfotransferase OS=Rattus norvegicus OX=10116 GN=Hs6st1 PE=1 SV=2	601.966	147.828	9009.21	1420.1	147.106	342.567	46.4541	3627.23	1285.09	34.2049	275.676	184.91
O55145|X3CL1_RAT;tr|Q6IRF7|Q6IRF7_RAT	6	5	240.26	0.415574	0.999949	1.65158	41976.6	Fractalkine OS=Rattus norvegicus OX=10116 GN=Cx3cl1 PE=2 SV=3	3100.77	6511.2	1197.79	6441.91	19104.4	9038.96	12768	9654.16	2833.76	6004.2	38654.6	5058.78
tr|A9UMV5|A9UMV5_RAT;tr|G3V8M6|G3V8M6_RAT;tr|Q9JL02|Q9JL02_RAT	9	9	331.8	0.415581	0.999949	1.32533	23740	Folr1 protein (Fragment) OS=Rattus norvegicus OX=10116 GN=Folr1 PE=2 SV=1	445762	376824	282861	152243	461297	886482	381918	361475	85940.9	411581	156806	568177
tr|D3ZU83|D3ZU83_RAT	3	3	128.78	0.415811	0.999949	2.12755	43223.5	ERGIC and golgi 3 OS=Rattus norvegicus OX=10116 GN=Ergic3 PE=1 SV=1	32325.1	19505.5	19913.4	176420	182672	518750	41607.2	194397	131559	19025.4	2161.29	57578.7
B0BNA5|COTL1_RAT	4	3	138.97	0.416207	0.999949	1.1203	15931.9	Coactosin-like protein OS=Rattus norvegicus OX=10116 GN=Cotl1 PE=1 SV=1	521.27	30358.1	101823	4771.95	62252.8	400.183	73917	21894.3	3560.79	33392.3	6565.03	39307.1
Q6AY20|MPRD_RAT	7	4	424.11	0.41662	0.999949	2.41928	31095.4	Cation-dependent mannose-6-phosphate receptor OS=Rattus norvegicus OX=10116 GN=M6pr PE=1 SV=1	215029	134073	87837.4	1.67456e+06	334925	140941	86119.5	126917	199661	113103	295901	247777
P53987|MOT1_RAT	5	5	200.86	0.417484	0.999949	2.31442	53238.3	Monocarboxylate transporter 1 OS=Rattus norvegicus OX=10116 GN=Slc16a1 PE=1 SV=1	8595.44	9566.15	12901.7	40221.7	42068.1	487242	15747.5	24381.8	43388	15994.4	556589	733928
F1MAB7|DGKI_RAT	1	1	21.51	0.417513	0.999949	1.33277	115894	Diacylglycerol kinase iota OS=Rattus norvegicus OX=10116 GN=Dgki PE=1 SV=1	88.034	1236.92	3288.42	41.1197	5701.11	0	1966.02	104.459	38.0767	1394.5	8206	2092.62
tr|A1L1L9|A1L1L9_RAT;tr|F1LQZ0|F1LQZ0_RAT	2	2	78.07	0.417668	0.999949	1.2445	27901.6	RGD1563224 protein OS=Rattus norvegicus OX=10116 GN=Tmem65 PE=2 SV=1	1.72317e+06	2.56336e+06	1.53752e+06	2.41737e+06	1.72575e+06	152307	2.89341e+06	2.22877e+06	2.6841e+06	2.7561e+06	1.07861e+06	952689
P50411|IPP2_RAT	1	1	102.23	0.417673	0.999949	2.01026	23071.2	Protein phosphatase inhibitor 2 OS=Rattus norvegicus OX=10116 GN=Ppp1r2 PE=1 SV=2	959.535	536.11	637.681	81.7861	26685.6	4669.37	1114.56	7239.94	480.458	428.385	44216.8	14004.4
P27139|CAH2_RAT	7	6	324.14	0.418183	0.999949	1.85588	29113.8	Carbonic anhydrase 2 OS=Rattus norvegicus OX=10116 GN=Ca2 PE=1 SV=2	577038	161350	257711	33990.2	442498	52703.3	196815	91270.5	116830	166972	4750.71	245228
Q5XID1|CPIN1_RAT	2	2	133.91	0.418655	0.999949	1.35233	33041.5	Anamorsin OS=Rattus norvegicus OX=10116 GN=Ciapin1 PE=1 SV=1	64566.4	4084.45	105422	4209.52	2677.06	7528.02	8365.66	9374.68	170967	30794.8	21061.7	14333.8
tr|D3ZGJ1|D3ZGJ1_RAT;tr|F1M2C7|F1M2C7_RAT;tr|M0R3U3|M0R3U3_RAT;tr|M0R5N5|M0R5N5_RAT;tr|M0R8H3|M0R8H3_RAT;tr|M0RAH9|M0RAH9_RAT	1	1	32.59	0.418737	0.999949	1.33824	72879.9	Immunoglobulin-like domain-containing receptor 2 OS=Rattus norvegicus OX=10116 GN=Ildr2 PE=1 SV=3	156081	386161	216173	282854	283747	19704.1	154107	238460	245130	344580	14261.5	8300.61
Q9EPJ3|RT26_RAT	1	1	30.19	0.419234	0.999949	2.74078	23349.7	28S ribosomal protein S26, mitochondrial OS=Rattus norvegicus OX=10116 GN=Mrps26 PE=1 SV=1	231.313	118.844	4042.43	50.1945	118.216	362.324	3120.37	6625.99	430.803	60.8534	3220.35	35.3881
P07872|ACOX1_RAT;tr|F1LQC1|F1LQC1_RAT	15	12	740.51	0.419388	0.999949	1.00253	74678.8	Peroxisomal acyl-coenzyme A oxidase 1 OS=Rattus norvegicus OX=10116 GN=Acox1 PE=1 SV=1	299518	947513	594503	154465	464488	336600	390501	666198	477638	1.21434e+06	13524.1	41961.6
Q63016|LAT1_RAT	5	4	220.82	0.419448	0.999949	1.48907	55903.4	Large neutral amino acids transporter small subunit 1 OS=Rattus norvegicus OX=10116 GN=Slc7a5 PE=1 SV=2	117936	141404	67348.9	89411.1	17126.3	3856.08	96106.9	152854	201269	155679	20922.2	24016
D3ZLZ7|IMDH1_RAT;tr|A0A0A0MXZ8|A0A0A0MXZ8_RAT	1	1	50.25	0.419463	0.999949	1.61756	55292.6	Inosine-5'-monophosphate dehydrogenase 1 OS=Rattus norvegicus OX=10116 GN=Impdh1 PE=3 SV=1	12.4061	621.586	9850.64	72.0859	13707.2	611.591	4900.59	692.679	201.822	266.047	12881.9	21294.5
P41243|MATK_RAT	1	1	22.87	0.419468	0.999949	6.2571	51896.8	Megakaryocyte-associated tyrosine-protein kinase OS=Rattus norvegicus OX=10116 GN=Matk PE=2 SV=1	0	18.828	1905.9	0	143.946	413.079	1107.56	0	21.6482	125.894	13538	735.478
Q5U3Y7|SGMR2_RAT	2	1	85	0.419677	0.999949	13.1969	20946.1	Sigma intracellular receptor 2 OS=Rattus norvegicus OX=10116 GN=Tmem97 PE=2 SV=1	0	0	0	2492.52	357.438	0	0	0	3733.96	0	30673.3	3203.29
A0A0G2K1Q8|ABCA3_RAT	5	4	229.37	0.420398	0.999949	79.4367	191766	Phospholipid-transporting ATPase ABCA3 OS=Rattus norvegicus OX=10116 GN=Abca3 PE=1 SV=1	54.054	15.4603	145.18	251.29	226.646	60.1842	1.59336	905.136	247.755	55.9667	58062.6	527.946
Q62658|FKB1A_RAT	4	4	196.08	0.420431	0.999949	1.4471	11922.6	Peptidyl-prolyl cis-trans isomerase FKBP1A OS=Rattus norvegicus OX=10116 GN=Fkbp1a PE=1 SV=3	1.32336e+06	510673	1.28761e+06	181936	1.10241e+06	377577	638998	817853	1.11088e+06	343540	303420	90932.8
Q5BJS0|DHX30_RAT;tr|A0A0G2JW51|A0A0G2JW51_RAT	1	1	46.87	0.421233	0.999949	2.15971	133997	ATP-dependent RNA helicase DHX30 OS=Rattus norvegicus OX=10116 GN=Dhx30 PE=1 SV=1	1463.96	1084.64	3196.72	229.699	5625.89	2.22363	3917.14	487.681	146.858	539.119	9626.86	10341.7
P47819|GFAP_RAT;tr|A0A1W2Q6C8|A0A1W2Q6C8_RAT;tr|A1E252|A1E252_RAT	2	1	88.88	0.421705	0.999949	50.2903	49957.1	Glial fibrillary acidic protein OS=Rattus norvegicus OX=10116 GN=Gfap PE=1 SV=2	316.418	38.0691	499.054	48.7342	0	11.6971	0	181.461	58.916	67.4709	44533.5	1122.53
Q63525|NUDC_RAT;tr|A0A0G2K0V8|A0A0G2K0V8_RAT	2	2	84.83	0.421856	0.999949	1.03543	38412.1	Nuclear migration protein nudC OS=Rattus norvegicus OX=10116 GN=Nudc PE=1 SV=1	240228	290388	354813	17417.3	386264	14817.3	276198	383113	170573	290464	114634	115142
Q63537|SYN2_RAT;tr|G3V733|G3V733_RAT	28	21	1652.99	0.421877	0.999949	1.23986	63456.8	Synapsin-2 OS=Rattus norvegicus OX=10116 GN=Syn2 PE=1 SV=1	1.27164e+06	224755	414543	669265	1.10207e+06	1.24406e+06	738774	873446	1.56548e+06	309506	35837.3	450272
Q63475|PTPR2_RAT	8	7	358.03	0.422322	0.999949	2.3375	111863	Receptor-type tyrosine-protein phosphatase N2 OS=Rattus norvegicus OX=10116 GN=Ptprn2 PE=1 SV=1	311839	425764	250915	35264.8	49775.4	97243.6	341289	953931	926021	425078	27467.4	62964.7
tr|A0A0G2JY73|A0A0G2JY73_RAT;tr|D4A554|D4A554_RAT	3	3	117.31	0.422735	0.999949	5.46147	179115	Eukaryotic translation initiation factor 4 gamma, 3 OS=Rattus norvegicus OX=10116 GN=Eif4g3 PE=1 SV=1	784.086	851.102	1421.55	990.58	696.537	1079.38	1393.09	647.262	207.344	1787.5	25475.3	2292.86
tr|Q6AYS3|Q6AYS3_RAT	5	3	218.15	0.422945	0.999949	1.01122	51215.9	Carboxypeptidase OS=Rattus norvegicus OX=10116 GN=Ctsa PE=1 SV=1	145321	272039	65995.8	123064	345254	271868	189059	291352	510493	192113	20033.2	6922.54
P55062|BI1_RAT;tr|Q7TMC1|Q7TMC1_RAT	1	1	25.03	0.423127	0.999949	1.89969	26463.7	Bax inhibitor 1 OS=Rattus norvegicus OX=10116 GN=Tmbim6 PE=2 SV=2	234.646	0	0	830.686	1098.06	764.576	0	0	0	0	4385.02	1177.21
Q08469|S6A15_RAT	3	2	131.33	0.423385	0.999949	2.55336	81596.2	Sodium-dependent neutral amino acid transporter B(0)AT2 OS=Rattus norvegicus OX=10116 GN=Slc6a15 PE=1 SV=1	5229.28	7122.04	5080.84	11083.5	8484.93	6350.83	6461.15	4908.2	18604	8089.82	69152.2	3476.51
Q08201|MDR3_RAT;tr|D4A0Y9|D4A0Y9_RAT;tr|G3V9C8|G3V9C8_RAT;tr|G3V9J6|G3V9J6_RAT;tr|Q6PSM0|Q6PSM0_RAT;tr|Q8R427|Q8R427_RAT;tr|Q9JK64|Q9JK64_RAT	4	4	210.94	0.423989	0.999949	1.32408	140655	Phosphatidylcholine translocator ABCB4 OS=Rattus norvegicus OX=10116 GN=Abcb4 PE=1 SV=1	13136.9	18917.9	7114.59	14046.9	3442.7	82473	5367.47	3594.36	2194.79	10423	160859	1784.15
P04041|GPX1_RAT;P83645|GPX2_RAT;tr|A0A0G2K278|A0A0G2K278_RAT;tr|M0RAM5|M0RAM5_RAT;tr|Q6PDW8|Q6PDW8_RAT	1	1	23.96	0.42402	0.999949	21.8787	22305.3	Glutathione peroxidase 1 OS=Rattus norvegicus OX=10116 GN=Gpx1 PE=1 SV=4	182.692	52.2692	251.719	175.894	120.97	73.8084	211.288	277.077	6.61746	157.151	17370.5	735.16
tr|A0A0G2JZ69|A0A0G2JZ69_RAT;tr|A0A0G2K1Y8|A0A0G2K1Y8_RAT;tr|C9EH87|C9EH87_RAT	51	41	2555.88	0.424297	0.999949	1.49678	286709	Spectrin alpha chain, non-erythrocytic 1 OS=Rattus norvegicus OX=10116 GN=Sptan1 PE=1 SV=1	785958	873747	798450	900119	490013	2.21773e+06	554072	936797	1.23641e+06	901930	4.22924e+06	1.22107e+06
Q4V885|COL12_RAT	2	1	65.35	0.424377	0.999949	3.25798	81546.3	Collectin-12 OS=Rattus norvegicus OX=10116 GN=Colec12 PE=2 SV=1	372.547	75.7372	118.034	67.231	27.7305	2283.88	80.3814	0	8.67839	0	8083.09	1423.1
P30919|ASPG_RAT	1	1	36.02	0.424804	0.999949	1.16373	37167.4	N(4)-(Beta-N-acetylglucosaminyl)-L-asparaginase OS=Rattus norvegicus OX=10116 GN=Aga PE=1 SV=2	48.8156	3448.3	4388.82	0.698712	25959.4	8.29881	3626.54	249.817	987.581	1237.56	62.5243	22927.2
tr|M0RDM7|M0RDM7_RAT	3	2	100.88	0.42496	0.999949	13.6299	108570	GPI ethanolamine phosphate transferase 2 OS=Rattus norvegicus OX=10116 GN=LOC100910143 PE=3 SV=2	649.885	77.273	324.835	608.918	30.7624	104.394	140.573	318.337	329.157	111.665	23471.5	108.919
tr|G3V644|G3V644_RAT;tr|O54755|O54755_RAT	3	3	127.55	0.425048	0.999949	1.22923	49299.9	Complex I-9kD OS=Rattus norvegicus OX=10116 GN=Ndufv3 PE=1 SV=1	577426	431054	72090.4	530046	44229.8	771353	250231	83369.7	1.01328e+06	575939	6750.44	44176.6
Q6P7B0|SYWC_RAT;tr|A0A0G2K673|A0A0G2K673_RAT;tr|F8WFH8|F8WFH8_RAT	1	1	36	0.42518	0.999949	3.23395	54143.6	Tryptophan--tRNA ligase, cytoplasmic OS=Rattus norvegicus OX=10116 GN=Wars1 PE=1 SV=2	9932.05	0	67423.1	16733.6	1863.57	7934.1	17124.4	777.209	5552.57	0	8669.52	0
tr|G3V6S2|G3V6S2_RAT	8	7	354.52	0.425439	0.999949	1.23695	98192.6	Citrate hydro-lyase OS=Rattus norvegicus OX=10116 GN=Aco1 PE=1 SV=1	181805	88565.1	141218	204315	29125.7	3180.97	35621.9	186728	282139	134346	102136	60829
tr|D4AEH9|D4AEH9_RAT	1	1	25.64	0.425529	0.999949	1.04598	174331	4-alpha-glucanotransferase OS=Rattus norvegicus OX=10116 GN=Agl PE=1 SV=1	87774.7	44954.8	25499.2	93311.9	50316.5	148899	83171.3	118935	162195	54518.6	1865.38	10254.3
Q5M9I5|QCR6_RAT	3	3	251.54	0.42556	0.999949	1.38907	10423.6	Cytochrome b-c1 complex subunit 6, mitochondrial OS=Rattus norvegicus OX=10116 GN=Uqcrh PE=3 SV=1	424132	765235	169226	73458	20888.8	12453.3	8412.53	187244	38340.7	775494	43039.2	2413.53
Q9JKA9|HCN2_RAT;tr|F1LRY7|F1LRY7_RAT	4	1	130.49	0.425641	0.999949	933.821	94920.1	Potassium/sodium hyperpolarization-activated cyclic nucleotide-gated channel 2 OS=Rattus norvegicus OX=10116 GN=Hcn2 PE=1 SV=3	0	0	17.6685	0.887517	0	8.67882	0	17.5739	0	3.69611	25411.2	0
tr|F7EPH4|F7EPH4_RAT;tr|Q499R7|Q499R7_RAT	9	9	476	0.425674	0.999949	1.24296	32771.1	Inorganic diphosphatase OS=Rattus norvegicus OX=10116 GN=Ppa1 PE=1 SV=1	165833	126968	198074	269729	58064.2	85267.3	193831	264897	317946	129483	99473.8	117922
Q6MG55|ABHGA_RAT	13	10	442.08	0.425898	0.999949	1.44598	63038.2	Phosphatidylserine lipase ABHD16A OS=Rattus norvegicus OX=10116 GN=Abhd16a PE=2 SV=1	251848	401347	156944	788543	183855	187966	378746	433917	1.17256e+06	509630	207937	146515
Q5QD51|AKA12_RAT;tr|Q62766|Q62766_RAT	4	3	164.4	0.425986	0.999949	9.57273	181109	A-kinase anchor protein 12 OS=Rattus norvegicus OX=10116 GN=Akap12 PE=1 SV=1	2458.67	1538	338.335	2266.13	4621.43	1163.73	874.988	2131.76	377.617	2259.99	105353	7573.61
tr|A0A0G2JZA7|A0A0G2JZA7_RAT;tr|D3ZZ19|D3ZZ19_RAT	4	1	86.99	0.426239	0.999949	3.03819	153953	Hyaluronoglucosaminidase OS=Rattus norvegicus OX=10116 GN=Cemip2 PE=1 SV=1	1.2939	16.4404	6348.21	63.5988	7.45396	100.223	2662.04	0	17.1426	388.513	16051.2	742.438
tr|A0A0G2JU96|A0A0G2JU96_RAT;tr|A0A0G2JUA5|A0A0G2JUA5_RAT	11	11	399.79	0.426726	0.999949	1.22768	571866	AHNAK nucleoprotein OS=Rattus norvegicus OX=10116 GN=Ahnak PE=1 SV=1	223184	132333	158670	67903.7	67538.4	210332	78216.2	233286	192778	84667.2	26641	84890.1
P15791|KCC2D_RAT	17	5	828.49	0.426933	0.999949	1.26516	60080.8	Calcium/calmodulin-dependent protein kinase type II subunit delta OS=Rattus norvegicus OX=10116 GN=Camk2d PE=1 SV=1	240746	202853	367561	88544.2	209141	143358	183016	202019	196155	236390	42764	129412
tr|A0A0G2JUJ9|A0A0G2JUJ9_RAT;tr|D4A2Z6|D4A2Z6_RAT	5	4	203.31	0.427494	0.999949	1.42559	87716.8	SEC63 homolog, protein translocation regulator OS=Rattus norvegicus OX=10116 GN=Sec63 PE=1 SV=1	63486	59296.1	71061.9	260970	258233	190004	35952	138958	227007	51585.4	88273	91681.7
Q4V8I7|LRC8A_RAT	9	6	365.3	0.427726	0.999949	1.68792	94161.6	Volume-regulated anion channel subunit LRRC8A OS=Rattus norvegicus OX=10116 GN=Lrrc8a PE=1 SV=1	101087	59804.5	53800.8	405977	42370	118301	43738	109945	145132	76507.4	65344	22234
Q925Q9|SH3K1_RAT;tr|A0A0H2UHD8|A0A0H2UHD8_RAT;tr|M0RBZ7|M0RBZ7_RAT;tr|Q6IRL5|Q6IRL5_RAT	1	1	22.65	0.427932	0.999949	8.09623	78086	SH3 domain-containing kinase-binding protein 1 OS=Rattus norvegicus OX=10116 GN=Sh3kbp1 PE=1 SV=2	1.19453	320.574	369.614	0	564.224	17.2123	301.346	84.3478	0	198.331	9463.09	257.911
tr|D4ADD7|D4ADD7_RAT	1	1	59.78	0.427948	0.999949	1.20512	16431.7	Glutaredoxin 5 OS=Rattus norvegicus OX=10116 GN=Glrx5 PE=1 SV=1	213414	28260.3	30285.3	73.8124	1854.07	1563.28	130553	3968.96	167976	19934.7	6553.6	2965.03
tr|A0A0G2K1R5|A0A0G2K1R5_RAT	25	1	1557.53	0.427966	0.999949	1.38737	54121.6	CaM kinase-like vesicle-associated protein OS=Rattus norvegicus OX=10116 GN=Camkv PE=1 SV=1	419815	204874	263944	116785	383883	72180.2	195369	222691	334740	105326	156104	39185.2
P62138|PP1A_RAT	12	3	528.52	0.428146	0.999949	1.56508	37512.1	Serine/threonine-protein phosphatase PP1-alpha catalytic subunit OS=Rattus norvegicus OX=10116 GN=Ppp1ca PE=1 SV=1	42489.8	42927	44645.8	7705.02	14964.5	6249.77	10696.3	45275	82187	36419.3	65521.9	8720.53
O35142|COPB2_RAT;tr|Q5M7X1|Q5M7X1_RAT	1	1	51.66	0.428171	0.999949	1.82369	102551	Coatomer subunit beta' OS=Rattus norvegicus OX=10116 GN=Copb2 PE=1 SV=3	0	14.1287	0	0	0	6658.67	0	64.7823	61.3735	0	12017.1	25.8534
P97573|SHIP1_RAT;tr|F1M981|F1M981_RAT	1	1	53.98	0.42826	0.999949	1.41459	133593	Phosphatidylinositol 3,4,5-trisphosphate 5-phosphatase 1 OS=Rattus norvegicus OX=10116 GN=Inpp5d PE=1 SV=1	16.7519	113.205	5683.3	0	17873	263.237	1079.96	0	0	72.19	0	15778.2
Q64350|EI2BE_RAT	1	1	29.44	0.428295	0.999949	1.24333	80206.5	Translation initiation factor eIF-2B subunit epsilon OS=Rattus norvegicus OX=10116 GN=Eif2b5 PE=1 SV=2	16694.1	22463.6	36956.4	36844.4	85847	53806	18803	66000.1	7417.92	41633.6	12817	56501.7
Q9JIH7|WNK1_RAT;tr|A0A0G2K3A0|A0A0G2K3A0_RAT	3	3	147.75	0.428404	0.999949	11.21	225110	Serine/threonine-protein kinase WNK1 OS=Rattus norvegicus OX=10116 GN=Wnk1 PE=1 SV=2	72.1468	517.232	2309.45	78.5484	1364.05	716.028	987.36	389.645	59.0191	462.371	51887.4	2907.96
Q09QM4|GPR17_RAT	1	1	38.47	0.428602	0.999949	2.0578	37869.7	Uracil nucleotide/cysteinyl leukotriene receptor OS=Rattus norvegicus OX=10116 GN=Gpr17 PE=2 SV=1	28860.6	60143	28251.8	35639.5	50891.3	632654	24413.6	21475.1	34307.9	29702.7	15753.8	280820
P63012|RAB3A_RAT	12	6	623.23	0.428714	0.999949	1.55706	24969.9	Ras-related protein Rab-3A OS=Rattus norvegicus OX=10116 GN=Rab3a PE=1 SV=1	1.91122e+06	902927	441738	994063	3.43995e+06	3.15116e+06	1.11834e+06	1.38045e+06	2.01634e+06	914219	269981	1.2632e+06
O88588|PACS1_RAT;tr|F1LPG3|F1LPG3_RAT	4	3	129.33	0.428825	0.999949	1.32022	104700	Phosphofurin acidic cluster sorting protein 1 OS=Rattus norvegicus OX=10116 GN=Pacs1 PE=1 SV=1	253.793	3273.27	11013.9	546.939	224225	394.139	1306.85	6754.58	1550.07	3613.91	44007.2	124334
tr|A0A0G2JZX9|A0A0G2JZX9_RAT;tr|A0A0G2K2K1|A0A0G2K2K1_RAT;tr|Q9EPR9|Q9EPR9_RAT	1	1	37.28	0.428857	0.999949	5.43787	57966.2	Phosphodiesterase OS=Rattus norvegicus OX=10116 GN=Pde1a PE=3 SV=1	15.6249	3377.96	15813.2	44.9414	886.646	228.847	7735.32	201.313	12.1345	899.753	29932.5	71973.2
Q00981|UCHL1_RAT	24	21	1433.56	0.429333	0.999949	1.21662	24838.2	Ubiquitin carboxyl-terminal hydrolase isozyme L1 OS=Rattus norvegicus OX=10116 GN=Uchl1 PE=1 SV=2	4.04039e+06	2.55092e+06	3.76323e+06	3.02646e+06	1.34909e+06	5.34501e+06	2.83622e+06	3.53108e+06	5.18425e+06	2.74075e+06	1.4393e+06	769136
Q9Z0V6|PRDX3_RAT;tr|G3V7I0|G3V7I0_RAT	6	5	277.25	0.429405	0.999949	1.67188	28295.4	Thioredoxin-dependent peroxide reductase, mitochondrial OS=Rattus norvegicus OX=10116 GN=Prdx3 PE=1 SV=2	123142	162545	82281.9	56482.4	49977.8	7502.34	124537	213625	182136	209843	12425.9	63167.5
tr|D3ZT64|D3ZT64_RAT	1	1	51.38	0.429562	0.999949	1.1678	211362	Autophagy-related 2A OS=Rattus norvegicus OX=10116 GN=Atg2a PE=1 SV=1	10852	1356.88	534.881	5592.62	2258.6	26.9538	604.322	0	45.9875	813.338	20420.6	2198.06
tr|D3ZK73|D3ZK73_RAT	2	2	59.2	0.429727	0.999949	1.29856	110811	Cullin 4B OS=Rattus norvegicus OX=10116 GN=Cul4b PE=1 SV=1	131.766	12772.2	34481.9	4137.47	17211.3	2926.6	33474	3187.38	3424.73	10716.5	8343.92	33909.9
tr|B2RZB5|B2RZB5_RAT	2	2	49.48	0.429846	0.999949	1.01256	25134	Charged multivesicular body protein 2A OS=Rattus norvegicus OX=10116 GN=Chmp2a PE=1 SV=1	259.238	32781.5	130744	2068.85	10691.4	213417	76840.4	4843.12	16536.8	18777.6	200430	77433.1
tr|D4A781|D4A781_RAT	9	7	349.05	0.430013	0.999949	2.49269	123706	Importin 5 OS=Rattus norvegicus OX=10116 GN=Ipo5 PE=1 SV=1	941.953	11175.2	5939.79	892.292	8470.38	520.378	955.344	4114.65	1601.59	15178.8	44781.1	3014.47
Q6PDV7|RL10_RAT	7	5	309.71	0.430331	0.999949	1.31995	24603.9	60S ribosomal protein L10 OS=Rattus norvegicus OX=10116 GN=Rpl10 PE=1 SV=3	27707.8	38768.1	26499.4	58782.3	12248.6	319820	14799.9	149940	220484	42493.4	170229	40681.1
tr|A0A0G2K4C6|A0A0G2K4C6_RAT;tr|F1M5N4|F1M5N4_RAT	3	2	125.53	0.430423	0.999949	1.35209	63436.4	Malic enzyme OS=Rattus norvegicus OX=10116 GN=Me3 PE=3 SV=1	66764.8	64852.8	34083.2	64566.7	25800.9	1066.95	47982.7	73833	124911	63973.4	15899.7	21069.2
P24392|PEX2_RAT	1	1	58.37	0.430575	0.999949	1.10028	34767.6	Peroxisome biogenesis factor 2 OS=Rattus norvegicus OX=10116 GN=Pex2 PE=2 SV=1	0	1807.67	16190.8	0	0	636.872	181.112	55.8432	116.98	8.89168	19454.7	686.71
tr|A0A0G2KAM4|A0A0G2KAM4_RAT	18	1	1034.93	0.430818	0.999949	1.4643	53881.4	Fascin OS=Rattus norvegicus OX=10116 GN=Fscn1 PE=1 SV=1	21428.3	12737.1	9389.79	25700.6	56893.7	48693.7	21994.4	15057	36191.5	15044.7	6181.91	24934.7
P97612|FAAH1_RAT	27	23	1425.9	0.431099	0.999949	2.30916	63356.7	Fatty-acid amide hydrolase 1 OS=Rattus norvegicus OX=10116 GN=Faah PE=1 SV=1	351739	801345	508385	81965.2	660209	340553	679210	1.1436e+06	3.06411e+06	1.05666e+06	322869	70328
tr|Q5XIU4|Q5XIU4_RAT	3	3	117.81	0.431194	0.999949	1.41919	28234	B-cell receptor-associated protein OS=Rattus norvegicus OX=10116 GN=Bcap29 PE=1 SV=1	225625	84399.2	82167.8	557586	474742	582086	101828	609775	379079	60763	53000.9	209466
tr|D3ZCG3|D3ZCG3_RAT	6	6	203.76	0.431776	0.999949	1.97601	188483	Protein MON2 homolog OS=Rattus norvegicus OX=10116 GN=Mon2 PE=1 SV=3	875.436	7108.06	11856.3	14467.9	1033.93	2077.75	6023.55	6879.12	6278.79	2740.46	50144	1875.22
O08873|MADD_RAT;tr|A0A0G2KA27|A0A0G2KA27_RAT	6	6	197.61	0.431842	0.999949	2.20815	177991	MAP kinase-activating death domain protein OS=Rattus norvegicus OX=10116 GN=Madd PE=1 SV=1	3161.92	3305.16	16572.5	475.016	14554.3	3046.7	9491.21	2312.15	885.482	8982.49	46964.7	22153.3
tr|Q0GLB6|Q0GLB6_RAT	22	16	1019.14	0.43241	0.999949	1.13822	91253.1	DPPY splice variant c OS=Rattus norvegicus OX=10116 GN=Dpp10 PE=2 SV=1	504075	842122	514030	551551	1.07835e+06	444955	697128	648261	735441	766138	17485.3	592773
P26051|CD44_RAT;tr|D3ZGF1|D3ZGF1_RAT;tr|F1LSA1|F1LSA1_RAT;tr|O08779|O08779_RAT;tr|O70509|O70509_RAT	3	3	124.63	0.43331	0.999949	31.9165	55945.7	CD44 antigen OS=Rattus norvegicus OX=10116 GN=Cd44 PE=1 SV=2	71.7312	0.00542791	0.573287	15.5204	23.5165	169.607	0	138.478	18.2815	11.1156	8753.33	45.8575
Q641X8|EIF3E_RAT;tr|A0A0G2K273|A0A0G2K273_RAT	3	3	108.76	0.43334	0.999949	1.29985	52220.9	Eukaryotic translation initiation factor 3 subunit E OS=Rattus norvegicus OX=10116 GN=Eif3e PE=2 SV=1	9726.02	9000.37	41330.2	289.466	35117.9	38.6595	22937.5	1250.68	2491.06	7229.96	64474.4	25755.3
tr|D3ZD89|D3ZD89_RAT	1	1	28.68	0.433395	0.999949	10.1462	101010	N(alpha)-acetyltransferase 15, NatA auxiliary subunit OS=Rattus norvegicus OX=10116 GN=Naa15 PE=1 SV=2	72.3891	112.624	192.096	38.5649	146.621	1391.8	62.4294	102.462	223.255	141.679	18902.5	394.304
tr|A0A0G2JWK6|A0A0G2JWK6_RAT	1	1	23.93	0.433621	0.999949	17.3457	53714.3	APC membrane recruitment protein 2 OS=Rattus norvegicus OX=10116 GN=Amer2 PE=1 SV=1	25.0926	3.11696	7.08711	0.043902	17.1306	0	33.4367	0	0	5.36895	814.398	56.9441
tr|A0A0G2JXZ7|A0A0G2JXZ7_RAT;tr|G3V602|G3V602_RAT	2	2	54.28	0.434341	0.999949	1.63849	78978.3	Xenotropic and polytropic retrovirus receptor 1 OS=Rattus norvegicus OX=10116 GN=Xpr1 PE=1 SV=1	90.3595	4804.39	12483	18.934	3668.48	478.685	5670.11	442.669	136.749	1662.73	17566.6	9820.66
P04906|GSTP1_RAT;tr|B6DYQ7|B6DYQ7_RAT	7	4	334.78	0.434609	0.999949	1.37387	23438.9	Glutathione S-transferase P OS=Rattus norvegicus OX=10116 GN=Gstp1 PE=1 SV=2	279520	308518	392788	180302	155675	631644	294167	581245	957831	379133	307906	156626
tr|G3V8S0|G3V8S0_RAT;tr|Q6P796|Q6P796_RAT	1	1	47.92	0.435226	0.999949	4.47537	27467.6	Serine peptidase inhibitor, Kunitz type, 2 OS=Rattus norvegicus OX=10116 GN=Spint2 PE=1 SV=1	0	40.5862	40.0349	0	542.548	0	37.455	0	89.0042	0	1950.48	711.967
tr|D3ZH39|D3ZH39_RAT	6	3	195.46	0.436538	0.999949	2.06718	115537	Receptor protein-tyrosine kinase OS=Rattus norvegicus OX=10116 GN=Ephb3 PE=4 SV=1	7294.46	2439.4	15114	16052.7	14229	6545.05	11051	25955.9	61927.5	3977.02	3775.59	20805.7
Q920K5|BAALC_RAT	2	2	63.57	0.436582	0.999949	1.13205	15475.1	Brain and acute leukemia cytoplasmic protein OS=Rattus norvegicus OX=10116 GN=Baalc PE=1 SV=3	297.09	2489.61	23989.8	889.451	21477.6	401.088	6829.5	2855.47	1875.62	893.953	14803.7	28829.1
Q63488|S20A2_RAT	3	2	231.15	0.437088	0.999949	1.11297	70747.7	Sodium-dependent phosphate transporter 2 OS=Rattus norvegicus OX=10116 GN=Slc20a2 PE=1 SV=1	13402.5	38835.3	152.95	16730.9	28580.9	1263.55	330.127	19.1331	1342.57	54831.4	29937.5	2460.09
tr|D3ZTY0|D3ZTY0_RAT	2	2	132.95	0.437137	0.999949	1.5677	16091.3	Cornichon family AMPA receptor auxiliary protein 4 OS=Rattus norvegicus OX=10116 GN=Cnih4 PE=1 SV=1	8592.57	40536.3	35186.1	90596.4	457.527	34751.4	12466.6	3071.46	48115	67287.6	2959.52	130.594
tr|D3ZG85|D3ZG85_RAT	1	1	39.56	0.43822	0.999949	220.62	105209	Cyclin-dependent kinase-like 5 OS=Rattus norvegicus OX=10116 GN=Cdkl5 PE=1 SV=2	0	10.55	0	0	0	0	0	0	0	2.72368	2324.82	0
tr|A0A0G2K642|A0A0G2K642_RAT;tr|G3V9U2|G3V9U2_RAT	2	1	55.72	0.438498	0.999949	3.23619	41753.8	3-ketoacyl-CoA thiolase, mitochondrial OS=Rattus norvegicus OX=10116 GN=Acaa2 PE=1 SV=1	25.5804	1644.94	14736.3	31.5829	335.894	6.5489	11314.5	1.694	20.3604	6310.18	11939.7	24719.6
D3ZUM2|SARM1_RAT	4	3	140.6	0.438634	0.999949	1.57492	79688.4	NAD(+) hydrolase SARM1 OS=Rattus norvegicus OX=10116 GN=Sarm1 PE=1 SV=1	3565.84	1847.59	3854.94	6706.6	1191.42	1118.51	2303	450.732	156.588	881.56	23231.9	1773.4
P20761|IGG2B_RAT	1	1	26.39	0.439138	0.999949	22.3134	36497.4	Ig gamma-2B chain C region OS=Rattus norvegicus OX=10116 GN=Igh-1a PE=1 SV=1	249.244	113.831	410.115	79.9937	286.653	1498.12	495.658	592.054	90.1305	72.0068	56970.1	641.845
tr|Q6AYM8|Q6AYM8_RAT	9	7	316.04	0.439547	0.999949	1.0589	67964.7	Glycosylphosphatidylinositol anchor attachment 1 OS=Rattus norvegicus OX=10116 GN=Gpaa1 PE=1 SV=1	228795	389183	348575	494839	240680	234892	239992	366434	939363	370339	8419.1	126500
P63100|CANB1_RAT;tr|A0A0G2K4H3|A0A0G2K4H3_RAT;tr|A0A0H2UHV6|A0A0H2UHV6_RAT	9	8	458.28	0.440175	0.999949	1.39035	19299.9	Calcineurin subunit B type 1 OS=Rattus norvegicus OX=10116 GN=Ppp3r1 PE=1 SV=2	1.45908e+06	638913	353528	434971	290135	1.01735e+06	696623	715032	398723	436988	126791	642336
tr|G3V8U9|G3V8U9_RAT	11	10	564.2	0.440758	0.999949	1.52599	25760.5	Proteasome subunit beta OS=Rattus norvegicus OX=10116 GN=Psmb4 PE=1 SV=2	245586	225477	434760	757425	79030.4	54182.9	222864	460452	137206	293061	20091.9	43566.9
B2RYU6|TPC2L_RAT	1	1	30.51	0.440758	0.999949	2.97405	16031.5	Trafficking protein particle complex subunit 2-like protein OS=Rattus norvegicus OX=10116 GN=Trappc2l PE=2 SV=1	5262.64	155.72	184.233	1797.59	97.0733	2904.14	278.052	6546.71	4540.27	561.604	18861.1	146.49
tr|Q68HB5|Q68HB5_RAT;tr|Q68HB6|Q68HB6_RAT	3	2	107.2	0.440777	0.999949	1.79613	135772	Protocadherin 7, isoform CRA_b OS=Rattus norvegicus OX=10116 GN=Pcdh7 PE=2 SV=1	233.188	3020.45	5414.7	298.026	12917.7	0.722925	5036.92	299.24	72.2004	1560.09	16610.3	15729.1
tr|F1LTM7|F1LTM7_RAT	1	1	48.02	0.440873	0.999949	28.6201	54546.4	Family with sequence similarity 189, member A1 OS=Rattus norvegicus OX=10116 GN=Fam189a1 PE=3 SV=2	1415.01	1670.87	75.2229	61.7596	23.211	95.3783	633.691	2.84457	127.116	1852.66	91884	1132.25
tr|G3V997|G3V997_RAT	4	1	148.9	0.441327	0.999949	1.65753	40543.5	Neuronal migration protein doublecortin OS=Rattus norvegicus OX=10116 GN=Dcx PE=1 SV=1	1743.06	1200.08	738.541	3128.82	428.15	5633.54	1492.71	1492.25	3945.15	1313.38	11974.3	1118.21
tr|D3ZTP8|D3ZTP8_RAT	2	1	72.61	0.44162	0.999949	17.0256	119686	GPI ethanolamine phosphate transferase 3 OS=Rattus norvegicus OX=10116 GN=Pigo PE=1 SV=1	818.905	2156.71	1606.25	0	1628.06	139255	0	0	1083.85	4219.43	1673.86	1566.77
Q9JM80|PHAG1_RAT;tr|A0A0G2K0M5|A0A0G2K0M5_RAT	1	1	61.08	0.44231	0.999949	8.57075	45914.6	Phosphoprotein associated with glycosphingolipid-enriched microdomains 1 OS=Rattus norvegicus OX=10116 GN=Pag1 PE=1 SV=1	151.497	59.4424	3563.4	104.88	214.327	70.0661	120.571	85.2099	42.4199	193.119	24747.6	10496.4
P14046|A1I3_RAT;Q03626|MUG1_RAT;tr|A0A0G2JUP5|A0A0G2JUP5_RAT;tr|A0A0G2JUW7|A0A0G2JUW7_RAT;tr|A0A0G2K926|A0A0G2K926_RAT;tr|D4A6E3|D4A6E3_RAT;tr|D4AA52|D4AA52_RAT;tr|G3V9J1|G3V9J1_RAT	2	2	63.57	0.442313	0.999949	2.45533	163772	Alpha-1-inhibitor 3 OS=Rattus norvegicus OX=10116 GN=A1i3 PE=1 SV=1	48.9355	2574.84	16058.2	292.243	3527.3	172.506	7776.18	280.181	115.996	1751.13	35659	10089.8
Q01728|NAC1_RAT;tr|M0R3V7|M0R3V7_RAT	5	4	234.84	0.442943	0.999949	2.30252	108184	Sodium/calcium exchanger 1 OS=Rattus norvegicus OX=10116 GN=Slc8a1 PE=1 SV=3	97963.7	150201	160422	28501.7	5595.27	48282.2	113595	221277	535627	219761	30963.2	9233.95
O35179|SH3G2_RAT	12	8	624.91	0.44304	0.999949	1.26432	39899.3	Endophilin-A1 OS=Rattus norvegicus OX=10116 GN=Sh3gl2 PE=1 SV=2	823552	471452	1.21955e+06	415069	1.38587e+06	388740	619152	907617	1.12308e+06	591707	95821.3	383371
tr|B2GVB9|B2GVB9_RAT	1	1	32.28	0.443336	0.999949	10.7958	75622.6	Fermitin family member 3 OS=Rattus norvegicus OX=10116 GN=Fermt3 PE=1 SV=1	0	150.711	829.244	4.27111	1910.36	2995.29	14051.2	0	55.6685	3831.73	44574.9	1072.46
Q641Z6|EHD1_RAT	7	2	201.68	0.443376	0.999949	2.25302	60602.9	EH domain-containing protein 1 OS=Rattus norvegicus OX=10116 GN=Ehd1 PE=1 SV=1	9215.53	10020.5	25671.2	5725.44	2371.62	4479.12	12742.9	4014.75	7437.84	7707.43	89909.2	7698.97
C0HL12|AGRB1_RAT	1	1	32.12	0.443594	0.999949	1.22478	172882	Adhesion G protein-coupled receptor B1 OS=Rattus norvegicus OX=10116 GN=Adgrb1 PE=1 SV=1	2029.65	4341.52	25517.5	2730.85	2946.47	3712.72	11870.9	1360.37	82.6708	3602.53	1504.49	15281.9
P60892|PRPS1_RAT	6	6	229.47	0.444013	0.999949	5.44732	34834.2	Ribose-phosphate pyrophosphokinase 1 OS=Rattus norvegicus OX=10116 GN=Prps1 PE=1 SV=2	37012.4	46188.6	113904	174682	2.33905e+06	11819.4	71587.8	82220.9	2594.61	53277.7	46809.5	243325
tr|D3Z8A4|D3Z8A4_RAT	2	2	58.74	0.444055	0.999949	1.00162	102377	Similar to mKIAA0738 protein (Predicted), isoform CRA_a OS=Rattus norvegicus OX=10116 GN=Tcaf1 PE=3 SV=1	19.3949	121.851	2821.44	13.0866	715.104	9223.49	1142.58	772.999	307.522	65.15	8977.45	1669.6
Q3B7U9|FKBP8_RAT	1	1	23.26	0.444158	0.999949	1.33244	43555.8	Peptidyl-prolyl cis-trans isomerase FKBP8 OS=Rattus norvegicus OX=10116 GN=Fkbp8 PE=2 SV=1	162.282	4274.24	25156.4	0.00288709	17027.8	210.133	17919.3	931.692	35.8776	3857.32	3944.91	35710.3
P24368|PPIB_RAT	18	18	1099.72	0.444921	0.999949	2.04081	23802.6	Peptidyl-prolyl cis-trans isomerase B OS=Rattus norvegicus OX=10116 GN=Ppib PE=1 SV=3	2.28867e+06	3.82566e+06	2.61013e+06	1.14022e+06	323503	494357	2.18297e+06	5.47239e+06	9.21423e+06	3.81011e+06	280086	841197
tr|F1LU48|F1LU48_RAT	14	13	679.28	0.445212	0.999949	1.1171	35011.1	Endoplasmic reticulum-golgi intermediate compartment 1 OS=Rattus norvegicus OX=10116 GN=Ergic1 PE=1 SV=2	1.94514e+06	1.11001e+06	1.37418e+06	1.97182e+06	2.11342e+06	2.72169e+06	1.85237e+06	2.08671e+06	3.06527e+06	1.31186e+06	170026	1.57215e+06
B0BNG0|EMC2_RAT	11	9	542.64	0.445447	0.999949	1.49456	34869.6	ER membrane protein complex subunit 2 OS=Rattus norvegicus OX=10116 GN=Emc2 PE=2 SV=1	355602	409818	447681	230932	1.78701e+06	977406	361503	553518	793729	379178	71840.3	656074
Q6PEC3|YIF1B_RAT;tr|A0A0H2UHX7|A0A0H2UHX7_RAT;tr|G3V9N6|G3V9N6_RAT	2	2	61.37	0.445788	0.999949	1.23839	28418.3	Protein YIF1B OS=Rattus norvegicus OX=10116 GN=Yif1b PE=1 SV=2	33.5433	17943	15703.8	147.935	49316.2	71.5149	16173.3	257.533	709.758	5894.78	6884.78	73133.3
D3ZDK2|UB2D1_RAT	2	1	113.11	0.446073	0.999949	9.25427	16602	Ubiquitin-conjugating enzyme E2 D1 OS=Rattus norvegicus OX=10116 GN=Ube2d1 PE=1 SV=1	3891.16	353.887	443.212	3321.18	2104.52	1081.55	1263.57	15552.2	312.675	579.713	84371.3	1526.76
tr|E9PSP1|E9PSP1_RAT	1	1	30.97	0.446093	0.999949	5.46028	54451	Phospholipid transfer protein OS=Rattus norvegicus OX=10116 GN=Pltp PE=1 SV=1	3065.92	279.866	85.1182	1052.28	531.988	9694.46	352.169	9779.88	1178.02	536.368	67970.9	501.376
O35831|CDK17_RAT;tr|G3V6J5|G3V6J5_RAT	3	1	102.71	0.446381	0.999949	9.87605	59432.1	Cyclin-dependent kinase 17 OS=Rattus norvegicus OX=10116 GN=Cdk17 PE=1 SV=1	202.281	763.096	652.658	106.821	393.699	220.074	414.79	175.779	115.47	573.568	21374.6	442.162
Q5M7W6|F234A_RAT	3	2	94.53	0.446646	0.999949	1.48623	60636.9	Protein FAM234A OS=Rattus norvegicus OX=10116 GN=Fam234a PE=1 SV=1	3529.85	8022.21	23663.1	343.29	16883.3	13020.4	21515.1	8929.61	2026.37	6287.16	21418.9	37114.6
P62919|RL8_RAT;tr|D4A6W6|D4A6W6_RAT	3	3	165.03	0.448366	0.999949	1.04145	28024.7	60S ribosomal protein L8 OS=Rattus norvegicus OX=10116 GN=Rpl8 PE=2 SV=2	7721.72	100964	267878	16777	6519.33	7904.01	154237	30148.1	8156.1	152279	56345.2	23501.5
Q2IBD4|CTTB2_RAT	1	1	51.1	0.449461	0.999949	1.44705	178767	Cortactin-binding protein 2 OS=Rattus norvegicus OX=10116 GN=Cttnbp2 PE=1 SV=1	3486.89	0	1065.38	23869.9	2839.2	6970.95	3836.12	2963.28	1718.34	1654.95	11841	4407.13
D4A208|SRGP2_RAT;tr|A0A0G2JZ92|A0A0G2JZ92_RAT;tr|B5DEJ1|B5DEJ1_RAT	4	3	185.53	0.449545	0.999949	1.5745	120877	SLIT-ROBO Rho GTPase-activating protein 2 OS=Rattus norvegicus OX=10116 GN=Srgap2 PE=1 SV=1	2043.59	4753.09	6498.7	11844.6	7363.09	1558.71	3766.73	91.4175	31.2387	8941.25	30142	10657.5
Q5RKH7|S35F6_RAT	1	1	88.5	0.450419	0.999949	1.54317	41092.3	Solute carrier family 35 member F6 OS=Rattus norvegicus OX=10116 GN=Slc35f6 PE=2 SV=1	10541.6	23378.6	22737.1	46922	5021.53	2185.83	53017.9	2861.94	25754.5	54222.3	22631	12474.5
Q3KRE8|TBB2B_RAT	161	2	9250.81	0.450765	0.999949	1.82686	49953.1	Tubulin beta-2B chain OS=Rattus norvegicus OX=10116 GN=Tubb2b PE=1 SV=1	2.83441e+06	1.26716e+06	1.27072e+07	381135	372807	3.23358e+06	2.52362e+06	2.35184e+06	4.81382e+06	1.53491e+06	48734.6	110708
D3ZXD8|TM245_RAT;tr|D3ZR79|D3ZR79_RAT	4	4	164.37	0.450997	0.999949	2.88025	97281.9	Transmembrane protein 245 OS=Rattus norvegicus OX=10116 GN=Tmem245 PE=1 SV=1	79953.2	345031	68000.2	98249.1	83294.2	96649.2	499058	380942	938908	347616	37899.6	16755.8
P47875|CSRP1_RAT	5	5	230.81	0.451373	0.999949	1.8011	20613.5	Cysteine and glycine-rich protein 1 OS=Rattus norvegicus OX=10116 GN=Csrp1 PE=1 SV=2	58321.8	10569.1	35826	16998.6	230690	130762	21446.2	18196.1	92572.5	7034.44	109580	19432.9
P24062|IGF1R_RAT;tr|A0A140TAB8|A0A140TAB8_RAT	1	1	40.89	0.451454	0.999949	3.41548	155395	Insulin-like growth factor 1 receptor OS=Rattus norvegicus OX=10116 GN=Igf1r PE=2 SV=2	42.9409	532.645	43475.5	112.333	101.24	162.97	301.703	68.5058	1686.21	31.9261	56999.3	92654
tr|D3ZDT1|D3ZDT1_RAT;tr|D3ZM69|D3ZM69_RAT	18	12	837.13	0.451511	0.999949	1.49755	102594	Erythrocyte membrane protein band 4.1-like 2 OS=Rattus norvegicus OX=10116 GN=Epb41l2 PE=1 SV=3	313631	180052	281302	49881.2	597799	498089	129918	248902	422930	144860	299802	36182.3
Q63768|CRK_RAT	5	5	208.56	0.451514	0.999949	1.16944	33844.7	Adapter molecule crk OS=Rattus norvegicus OX=10116 GN=Crk PE=1 SV=1	31123.4	5069.64	9790.95	3583.03	48608.3	441.005	1413.48	846.026	2475.67	1202.81	106558	2829.94
P07483|FABPH_RAT	4	4	146.42	0.451669	0.999949	2.65343	14774.7	Fatty acid-binding protein, heart OS=Rattus norvegicus OX=10116 GN=Fabp3 PE=1 SV=2	15385.8	25997.3	51145.6	4763.29	184513	231214	25129	9358.25	16337	17398.2	23950.3	101169
Q6P6Q2|K2C5_RAT	5	1	199.04	0.451848	0.999949	4.11185	61825.8	Keratin, type II cytoskeletal 5 OS=Rattus norvegicus OX=10116 GN=Krt5 PE=1 SV=1	156.548	256.961	80.8663	31.3741	3188.53	739.583	191.65	335.138	438.556	50.5497	15849.6	1448.1
Q8K3X8|HSBP1_RAT	2	2	110.91	0.452369	0.999949	1.07457	8584.72	Heat shock factor-binding protein 1 OS=Rattus norvegicus OX=10116 GN=Hsbp1 PE=3 SV=1	480948	361424	538987	359696	330383	382347	578245	418124	624112	386813	69065.2	207136
Q62718|NTRI_RAT	16	9	792.32	0.452641	0.999949	1.1639	37998.4	Neurotrimin OS=Rattus norvegicus OX=10116 GN=Ntm PE=1 SV=1	534843	714877	1.11812e+06	1.3808e+06	1.79609e+06	520003	1.46491e+06	1.49493e+06	314663	742487	108451	1.08528e+06
tr|D4ABB2|D4ABB2_RAT	5	5	207.57	0.452705	0.999949	1.28642	44305.8	Megalencephalic leukoencephalopathy with subcortical cysts 1 homolog (Human) (Predicted) OS=Rattus norvegicus OX=10116 GN=Mlc1 PE=1 SV=1	24336.1	13509.4	7942.39	26849.4	59615.7	51973.6	16420.3	95537.7	30403.5	25959.5	41117.2	27554.6
tr|F1M5J3|F1M5J3_RAT	3	1	148.07	0.453029	0.999949	608.841	33997.3	NIPA magnesium transporter 1 OS=Rattus norvegicus OX=10116 GN=Nipa1 PE=3 SV=2	34.835	0	0	0	0	0	0.610719	2.72382	0	0	21205.6	0
Q09426|CGT_RAT	15	13	790.48	0.453124	0.999949	2.86439	61126.1	2-hydroxyacylsphingosine 1-beta-galactosyltransferase OS=Rattus norvegicus OX=10116 GN=Ugt8 PE=1 SV=1	722524	1.16873e+06	975143	505309	336574	340339	1.40608e+06	1.80542e+06	5.18952e+06	2.82402e+06	98797.6	273003
D3ZZX1|I5P1_RAT	6	5	170.12	0.453471	0.999949	1.04016	47622.2	Inositol polyphosphate-5-phosphatase A OS=Rattus norvegicus OX=10116 GN=Inpp5a PE=1 SV=1	18709.1	21520.6	2854.94	163217	2454.06	2650.57	26964.1	10415.5	11452.3	16820.9	147238	7005.94
F1LW30|UNC5D_RAT;tr|A0A0G2KA37|A0A0G2KA37_RAT;tr|A0A0R3P9D5|A0A0R3P9D5_RAT	1	1	54.83	0.453713	0.999949	1.46771	106520	Netrin receptor UNC5D OS=Rattus norvegicus OX=10116 GN=Unc5d PE=1 SV=4	20285.7	1446.38	3682.27	3861.99	5558.25	618.34	4230.09	869.805	105.289	963.072	5876.66	12110.3
Q5HZW3|ASPH2_RAT	2	1	75.93	0.454009	0.999949	1.29089	38727.2	Aspartate beta-hydroxylase domain-containing protein 2 OS=Rattus norvegicus OX=10116 GN=Asphd2 PE=2 SV=1	48014.4	4441.51	14598	32297.2	35456.4	64498.4	6064.38	10210.1	24277.4	6081.93	88675.9	19085
Q64270|EI2BA_RAT;tr|A0A0G2JV57|A0A0G2JV57_RAT;tr|A0A0U1RRY3|A0A0U1RRY3_RAT;tr|A0A0U1RRZ2|A0A0U1RRZ2_RAT;tr|A0A1L1WKF1|A0A1L1WKF1_RAT	1	1	33.01	0.454014	0.999949	1.22642	33678.3	Translation initiation factor eIF-2B subunit alpha OS=Rattus norvegicus OX=10116 GN=Eif2b1 PE=2 SV=1	10.573	1884.19	5020.56	0	21655.6	0	5724.41	136.553	135.207	875.862	8.86407	28159.2
P35952|LDLR_RAT;tr|G3V7A5|G3V7A5_RAT	1	1	39.07	0.454021	0.999949	4.73353	96621.9	Low-density lipoprotein receptor OS=Rattus norvegicus OX=10116 GN=Ldlr PE=1 SV=1	2958.56	6535.36	7631.5	684.919	355.504	7565.06	468.781	367.906	1442.19	58.6487	118826	634.693
P51794|CLCN4_RAT;tr|Q56A19|Q56A19_RAT	6	1	223.68	0.454542	0.999949	1.64632	83701.4	H(+)/Cl(-) exchange transporter 4 OS=Rattus norvegicus OX=10116 GN=Clcn4 PE=2 SV=1	660.445	1255.03	229.996	18016	2561.52	6250.27	712.313	4149.99	5337.99	2015.01	33001.6	2482.56
tr|A0A0G2K9H2|A0A0G2K9H2_RAT;tr|B4F7D6|B4F7D6_RAT	1	1	37.65	0.454869	0.999949	1.95878	118003	Serine/threonine-protein kinase 11-interacting protein OS=Rattus norvegicus OX=10116 GN=Stk11ip PE=1 SV=1	21.8247	2700.78	5241.29	43.038	7979.98	2131.09	6628.5	38.9174	3584	1643.57	4512.25	19081.9
Q6MG11|ATAT_RAT;tr|A0A0G2K9K5|A0A0G2K9K5_RAT	2	2	101.07	0.455268	0.999949	3.61194	47326.8	Alpha-tubulin N-acetyltransferase 1 OS=Rattus norvegicus OX=10116 GN=Atat1 PE=1 SV=1	0	16.0959	439.801	154.47	5968.32	1129.65	64.6902	113.509	94.1258	918.46	26175.8	475.487
Q6AYH6|EMC10_RAT	5	5	256.16	0.455748	0.999949	1.16866	26968.4	ER membrane protein complex subunit 10 OS=Rattus norvegicus OX=10116 GN=Emc10 PE=1 SV=1	459394	823321	629689	757449	1.48898e+06	1.62964e+06	750075	981532	1.8814e+06	698153	524503	117416
P13233|CN37_RAT;tr|A0A097BVJ5|A0A097BVJ5_RAT	56	51	3468.87	0.456119	0.999949	1.21395	47268.4	2',3'-cyclic-nucleotide 3'-phosphodiesterase OS=Rattus norvegicus OX=10116 GN=Cnp PE=1 SV=2	9.95181e+06	2.29608e+06	3.31717e+06	3.67808e+06	1.23406e+07	3.7733e+06	1.68159e+06	7.43351e+06	9.69461e+06	3.17859e+06	313018	6.82426e+06
P18420|PSA1_RAT	11	10	553.26	0.456339	0.999949	1.0314	29517.5	Proteasome subunit alpha type-1 OS=Rattus norvegicus OX=10116 GN=Psma1 PE=1 SV=2	257065	156172	262669	485174	94161.7	257081	50863	337011	382336	178526	508225	9321.01
tr|Q6P9V7|Q6P9V7_RAT	3	2	114.98	0.456573	0.999949	2.06715	28634.9	Proteasome (Prosome, macropain) activator subunit 1 OS=Rattus norvegicus OX=10116 GN=Psme1 PE=1 SV=1	1309.07	481.15	2245.25	1804.89	1188.44	1243.19	2047.18	712.87	910.31	833.241	9551.61	3044.26
tr|B2RZD4|B2RZD4_RAT	4	3	102.93	0.45674	0.999949	3.1778	13292.9	60S ribosomal protein L34 OS=Rattus norvegicus OX=10116 GN=Rpl34 PE=1 SV=1	2303.39	3495.88	1289.63	6103.51	4676.17	1588.79	7355	447.878	2886.12	11446.5	37134.8	2561.33
P31424|GRM5_RAT;tr|B2CZC8|B2CZC8_RAT	18	12	815.83	0.456778	0.999949	1.33269	131885	Metabotropic glutamate receptor 5 OS=Rattus norvegicus OX=10116 GN=Grm5 PE=1 SV=2	391733	249938	88038.2	102776	434645	90938	273967	147156	55400.2	195487	21333.8	325697
tr|B2GUU3|B2GUU3_RAT;tr|Q32KJ3|Q32KJ3_RAT;tr|Q3L472|Q3L472_RAT	2	2	66.74	0.457529	0.999949	5.98461	100473	Extracellular sulfatase OS=Rattus norvegicus OX=10116 GN=Sulf2 PE=2 SV=1	2983.43	161.395	1618.54	139.106	203.188	103.302	172.786	22.9498	0	0.748551	24262.7	6714.3
tr|D3Z956|D3Z956_RAT	2	2	49.2	0.458357	0.999949	1.0035	36450.5	Retinaldehyde binding protein 1 (Predicted), isoform CRA_a OS=Rattus norvegicus OX=10116 GN=Rlbp1 PE=4 SV=1	1112.11	3648.96	21092.1	1804.58	85704.6	1083.11	12023.5	801.284	36784.6	4127.22	19837	40472.8
P35435|ATPG_RAT;tr|Q6PCU0|Q6PCU0_RAT	13	11	635.63	0.45841	0.999949	1.5516	30190.7	ATP synthase subunit gamma, mitochondrial OS=Rattus norvegicus OX=10116 GN=Atp5f1c PE=1 SV=2	3.00343e+06	3.59387e+06	1.22805e+06	1.69313e+06	598810	1.2235e+07	3.28745e+06	4.12657e+06	2.91605e+06	3.68419e+06	130905	260764
tr|A0A0G2JZS1|A0A0G2JZS1_RAT;tr|F1LT58|F1LT58_RAT;tr|Q3KR98|Q3KR98_RAT;tr|Q56R15|Q56R15_RAT	1	1	21.17	0.458589	0.999949	9.09546	59893.4	Importin subunit alpha OS=Rattus norvegicus OX=10116 GN=Kpna6 PE=1 SV=1	840.554	1902.86	936.986	12908.1	2371.28	337.831	1233.99	3965.18	302.944	1494.55	164059	4465
tr|D3ZI74|D3ZI74_RAT	2	2	111.8	0.459024	0.999949	1.26373	21819.7	N-acetyltransferase 14 OS=Rattus norvegicus OX=10116 GN=Nat14 PE=4 SV=1	9173.08	8361.52	9666.43	6750.32	16988.4	237201	7949.13	450.076	903.066	6886.5	331065	16879.7
P0C5X8|TTYH1_RAT;tr|B4F773|B4F773_RAT	12	12	577.48	0.459595	0.999949	1.07317	49032.3	Protein tweety homolog 1 OS=Rattus norvegicus OX=10116 GN=Ttyh1 PE=1 SV=1	2.7018e+06	1.95331e+06	2.04788e+06	1.69929e+06	1.33461e+06	2.64493e+06	1.78106e+06	2.34925e+06	3.94255e+06	2.00513e+06	272461	1.18715e+06
Q9JJ19|NHRF1_RAT	11	11	422.09	0.4604	0.999949	1.31865	38830.4	Na(+)/H(+) exchange regulatory cofactor NHE-RF1 OS=Rattus norvegicus OX=10116 GN=Slc9a3r1 PE=1 SV=3	211517	103052	116823	60454.5	247311	323028	61943.8	274417	184708	75186.6	82244.6	127013
Q6Q7Y5|GNA13_RAT	10	6	436.36	0.460962	0.999949	1.27274	44011.6	Guanine nucleotide-binding protein subunit alpha-13 OS=Rattus norvegicus OX=10116 GN=Gna13 PE=1 SV=1	304433	178551	224577	149647	15586.5	31463.1	124696	268767	36740.5	264571	6649.38	9058.9
tr|A0A0G2JTT2|A0A0G2JTT2_RAT;tr|A0A0G2JUQ5|A0A0G2JUQ5_RAT;tr|Q498N4|Q498N4_RAT;tr|Q66SY1|Q66SY1_RAT;tr|Q66WT9|Q66WT9_RAT	8	6	329.43	0.461193	0.999949	1.02452	71050	Phosphatidylinositol binding clathrin assembly protein, isoform CRA_a OS=Rattus norvegicus OX=10116 GN=Picalm PE=1 SV=1	346181	412352	536091	100428	146194	85869.3	285850	66380.2	858463	405855	33639.9	16828.8
tr|F1LT78|F1LT78_RAT;tr|Q00IM8|Q00IM8_RAT	1	1	50.24	0.461233	0.999949	210.036	53273	Anthrax toxin receptor OS=Rattus norvegicus OX=10116 GN=Antxr2 PE=1 SV=3	0	111.391	11.9002	10.4603	36.2749	0.565885	5.00872	1.3938	1.12309	307.848	35506.3	8.74985
tr|A0A0G2K012|A0A0G2K012_RAT;tr|M0RAE4|M0RAE4_RAT	2	2	54.98	0.461267	0.999949	3.4778	58351.7	UBX domain protein 6 OS=Rattus norvegicus OX=10116 GN=Ubxn6 PE=1 SV=1	1563.7	351.526	2555.05	6458.19	1444.7	6.86511	7987.33	990.332	134.477	1425.23	31879.7	638.143
tr|Q52KJ9|Q52KJ9_RAT	6	6	321.24	0.461853	0.999949	1.64425	31434.8	Thioredoxin domain containing 1 OS=Rattus norvegicus OX=10116 GN=Tmx1 PE=1 SV=1	577732	1.56695e+06	1.20474e+06	3.57469e+06	4.29741e+06	289014	1.31909e+06	195896	864218	1.45781e+06	367230	2.79622e+06
tr|D3ZI66|D3ZI66_RAT	1	1	33.38	0.46236	0.999949	226.827	42585.8	Ring finger protein 149 OS=Rattus norvegicus OX=10116 GN=Rnf149 PE=1 SV=1	0	11.4677	3.06677	25.0407	0	20.9839	86.2607	0	181.562	0	13468.6	0
P16970|ABCD3_RAT	2	2	75.75	0.462876	0.999949	4.57611	75315.6	ATP-binding cassette sub-family D member 3 OS=Rattus norvegicus OX=10116 GN=Abcd3 PE=1 SV=3	28164.6	88520.8	68504.1	30052.3	5863.58	45122.2	123881	149156	785023	123496	35136.9	1593.27
tr|F1M2K6|F1M2K6_RAT	5	2	163.76	0.463171	0.999949	1.09636	131463	Plakophilin 4 OS=Rattus norvegicus OX=10116 GN=Pkp4 PE=1 SV=2	188.89	234.554	10524.2	126.701	2296	57.9899	597.911	1029.15	621.116	117.924	7811.22	2070.78
P21396|AOFA_RAT;tr|B2GV33|B2GV33_RAT;tr|G3V9Z3|G3V9Z3_RAT	22	15	1121	0.463415	0.999949	1.59711	59507.9	Amine oxidase [flavin-containing] A OS=Rattus norvegicus OX=10116 GN=Maoa PE=1 SV=1	1.34604e+06	2.06586e+06	1.02979e+06	308670	960191	62127.6	1.24734e+06	2.63174e+06	2.02446e+06	2.60232e+06	133590	580148
tr|D3ZZ21|D3ZZ21_RAT	3	3	134.66	0.463462	0.999949	1.36522	15638.3	Complex I-B17 OS=Rattus norvegicus OX=10116 GN=Ndufb6 PE=1 SV=1	255144	499865	182711	27154.7	64369.6	20580.2	277717	294950	27073.6	439408	331831	62265
O55096|DPP3_RAT	11	9	499.96	0.463538	0.999949	1.3237	83038.7	Dipeptidyl peptidase 3 OS=Rattus norvegicus OX=10116 GN=Dpp3 PE=1 SV=2	187503	139971	265869	79546.4	122404	142722	266244	246789	369157	169865	108811	80781.2
D3ZE85|FRS1L_RAT	4	4	190.16	0.463707	0.999949	1.79939	32456.6	DOMON domain-containing protein FRRS1L OS=Rattus norvegicus OX=10116 GN=Frrs1l PE=1 SV=1	235150	341467	228594	7847.69	19534	104800	343728	506530	540654	241921	19010.8	34889.6
Q63881|KCND2_RAT	2	2	66.28	0.463814	0.999949	2.16951	70548.6	Potassium voltage-gated channel subfamily D member 2 OS=Rattus norvegicus OX=10116 GN=Kcnd2 PE=1 SV=1	2563.62	1465.66	9653.66	8843.94	4181.99	1134.96	3816.11	7745.25	6464.6	963.934	37830.3	3587.39
tr|D3ZCS3|D3ZCS3_RAT	2	1	56.84	0.463857	0.999949	1.17265	41452.7	Poly(rC)-binding protein 4 OS=Rattus norvegicus OX=10116 GN=Pcbp4 PE=4 SV=1	599780	461816	993904	640958	424868	313148	720996	318427	1.94948e+06	496382	1789.89	540357
Q5XHZ0|TRAP1_RAT	5	2	238.7	0.464088	0.999949	1.07132	80461.2	Heat shock protein 75 kDa, mitochondrial OS=Rattus norvegicus OX=10116 GN=Trap1 PE=1 SV=1	358045	202879	139995	80937.1	248284	245203	270983	446815	226902	184880	26756.7	34099
tr|B1H223|B1H223_RAT;tr|E9PU42|E9PU42_RAT	1	1	45.44	0.464267	0.999949	1.90776	32908.2	Down syndrome critical region gene 3 OS=Rattus norvegicus OX=10116 GN=Vps26c PE=2 SV=1	17.181	177.646	831.767	18.6681	4802.71	23.4855	765.166	51.4778	68.662	34.7009	4580.55	5700.76
tr|D3ZFR9|D3ZFR9_RAT	2	1	68.53	0.464521	0.999949	2.62775	36407.9	Retinol dehydrogenase 13 OS=Rattus norvegicus OX=10116 GN=Rdh13 PE=1 SV=1	488.816	3871.56	2025.5	767.276	839.453	525.383	891.084	19.3972	37.7655	1071.56	19683.4	679.892
Q9Z1C7|RPGF4_RAT;tr|D3KR63|D3KR63_RAT;tr|F1LQ26|F1LQ26_RAT	1	1	44.05	0.464591	0.999949	8.68627	50116.9	Rap guanine nucleotide exchange factor 4 (Fragment) OS=Rattus norvegicus OX=10116 GN=Rapgef4 PE=2 SV=1	0	56.9978	607.808	31.5417	0	0	327.026	0	0	24.1964	94.8165	5602.63
tr|D4AE00|D4AE00_RAT	14	12	576.22	0.464609	0.999949	1.18369	119142	AP-3 complex subunit beta OS=Rattus norvegicus OX=10116 GN=Ap3b2 PE=1 SV=1	178272	139384	126196	277142	399916	182408	193393	153602	308330	188727	23260.7	233748
P49655|KCJ10_RAT;tr|A0A0H2UHF5|A0A0H2UHF5_RAT	3	3	130.12	0.464672	0.999949	1.33537	42480.2	ATP-sensitive inward rectifier potassium channel 10 OS=Rattus norvegicus OX=10116 GN=Kcnj10 PE=2 SV=1	4613.09	10615.7	26708	5796.68	73864.5	70602.1	7754.53	1786.99	6006.13	3340.56	64651.6	60390.3
tr|D3ZCV0|D3ZCV0_RAT	2	1	42.86	0.465546	0.999949	1.06464	103834	Actinin alpha 2 OS=Rattus norvegicus OX=10116 GN=Actn2 PE=1 SV=1	3.8196	3965.13	6768.79	0.046696	1830.65	0	7312.2	563.781	0.0400188	1301.37	298.583	2329.36
tr|D3ZYT8|D3ZYT8_RAT	1	1	29.19	0.465771	0.999949	1.15188	238175	1-phosphatidylinositol-3-phosphate 5-kinase OS=Rattus norvegicus OX=10116 GN=Pikfyve PE=1 SV=2	0	597.687	7339.58	0	7874.88	0	2774.52	117.361	0	230.498	807.818	9797.08
tr|B5DES0|B5DES0_RAT;tr|M0R8K2|M0R8K2_RAT	1	1	34.11	0.466095	0.999949	26.5073	13526.9	Small nuclear ribonucleoprotein Sm D2 OS=Rattus norvegicus OX=10116 GN=Snrpd2 PE=1 SV=1	35.1426	32.3763	341.387	1348.95	23.056	223.656	0	0	142.761	0	52736.7	256.092
Q6AY23|P5CR2_RAT	1	1	28.2	0.466334	0.999949	3.68346	33673.1	Pyrroline-5-carboxylate reductase 2 OS=Rattus norvegicus OX=10116 GN=Pycr2 PE=2 SV=1	0	1044.91	2375.25	19.6118	651.273	0	5522.16	0.144949	155.416	148.624	174.554	9068.27
Q6QI25|ORML3_RAT;tr|A0A0G2JSW1|A0A0G2JSW1_RAT;tr|D4A2I4|D4A2I4_RAT	1	1	53.17	0.466611	0.999949	13.0582	17462.6	ORM1-like protein 3 OS=Rattus norvegicus OX=10116 GN=Ormdl3 PE=2 SV=2	98.157	245.827	1535.29	58.4997	35.9211	5181.06	298.059	389.89	183.589	62.0296	91172.6	1321.91
P84100|RL19_RAT	3	2	147.87	0.466666	0.999949	1.16783	23466	60S ribosomal protein L19 OS=Rattus norvegicus OX=10116 GN=Rpl19 PE=1 SV=1	94215.3	51697.6	55020.1	94.3172	5606.86	0	52799.3	124352	14791.7	41959.5	65.4632	7346.03
tr|A0A0G2K618|A0A0G2K618_RAT;tr|D4A390|D4A390_RAT	3	2	84.47	0.466694	0.999949	1.09443	87979.8	LARGE xylosyl- and glucuronyltransferase 1 OS=Rattus norvegicus OX=10116 GN=Large1 PE=4 SV=1	4459.23	2548.19	174.735	40490.7	1216.09	6143.44	1425.69	16728.4	11421.9	4954.67	14164.8	1588.78
tr|D3ZSA9|D3ZSA9_RAT	23	21	1095.91	0.46677	0.999949	1.22046	133443	Nodal modulator 1 OS=Rattus norvegicus OX=10116 GN=Nomo1 PE=1 SV=1	282264	433429	319072	972357	892879	310567	302208	1.28851e+06	712121	417995	581641	615884
O55004|RNAS4_RAT;tr|W0UVG1|W0UVG1_RAT	1	1	44.96	0.467349	0.999949	90.6836	16903.3	Ribonuclease 4 OS=Rattus norvegicus OX=10116 GN=Rnase4 PE=1 SV=1	0	0	0.531069	39.1693	10.2966	616.395	35.0582	0.00608952	1.46189	6.99274	60339.2	48.1082
P61203|CSN2_RAT	1	1	44.01	0.468247	0.999949	2.1599	51596.8	COP9 signalosome complex subunit 2 OS=Rattus norvegicus OX=10116 GN=Cops2 PE=1 SV=1	737.47	4671.21	10622.4	894.783	5989.77	5910.65	0	22547.4	31476.7	7123.93	175.076	938.654
Q9JKE3|SCAM5_RAT;tr|A0A0G2K464|A0A0G2K464_RAT	10	8	494.28	0.468313	0.999949	1.94	26098.4	Secretory carrier-associated membrane protein 5 OS=Rattus norvegicus OX=10116 GN=Scamp5 PE=2 SV=1	1.98202e+06	2.56473e+06	2.39944e+06	214874	231944	297900	2.07824e+06	2.3175e+06	7.29592e+06	2.71985e+06	326309	182579
Q62919|NELL1_RAT;tr|D4A284|D4A284_RAT	1	1	34.65	0.468473	0.999949	2.64116	89212.6	Protein kinase C-binding protein NELL1 OS=Rattus norvegicus OX=10116 GN=Nell1 PE=2 SV=2	1285.77	51.9719	635.444	6196.96	1243.08	150.565	283.522	3159.06	1896.35	129.572	18676.1	1114.89
tr|D4A415|D4A415_RAT	3	3	164.71	0.46876	0.999949	2.08958	47936.1	Abraxas 2, BRISC complex subunit OS=Rattus norvegicus OX=10116 GN=Abraxas2 PE=1 SV=3	12.5758	631.734	4975.09	6.69335	9257.4	14.6334	4617.82	59.1866	9.99928	293.817	9050.24	17099.8
tr|B2RYJ7|B2RYJ7_RAT	8	2	439.8	0.468845	0.999949	1.59385	42281.4	ARP1 actin-related protein 1 homolog B (Yeast) OS=Rattus norvegicus OX=10116 GN=Actr1b PE=1 SV=1	604637	450120	212002	2.20531e+06	204272	1.20162e+06	651231	622145	997105	554731	52671.9	182611
Q642G4|PEX14_RAT	4	3	163.22	0.469352	0.999949	1.5229	40936.3	Peroxisomal membrane protein PEX14 OS=Rattus norvegicus OX=10116 GN=Pex14 PE=1 SV=1	37277.6	89274	42780.2	41917.2	97625.5	669.545	50329.4	515.411	760.559	68041.2	21188.6	62424.5
Q6AYB5|SRP54_RAT	1	1	40.64	0.469379	0.999949	1.79899	55704.7	Signal recognition particle 54 kDa protein OS=Rattus norvegicus OX=10116 GN=Srp54 PE=2 SV=1	15.3346	572.124	9320.36	30.2894	7896.97	258.633	3662.32	1020.19	22.7778	325.259	20019.1	7500.74
D4A2H2|SPTC1_RAT	2	2	66.66	0.469517	0.999949	2.3762	52548.8	Serine palmitoyltransferase 1 OS=Rattus norvegicus OX=10116 GN=Sptlc1 PE=1 SV=1	73956.7	159829	1.28832e+06	123575	340557	39668.5	171543	92827.2	49129.3	193957	34708	310418
tr|D3ZG43|D3ZG43_RAT	6	5	324.64	0.469688	0.999949	1.07874	30226.4	Complex I-30kD OS=Rattus norvegicus OX=10116 GN=Ndufs3 PE=1 SV=1	693876	832676	370034	96823.3	787636	170661	349249	676984	373821	780845	382750	620480
P05371|CLUS_RAT;tr|G3V836|G3V836_RAT;tr|Q6P7S6|Q6P7S6_RAT	9	9	575.48	0.470283	0.999949	1.51945	51375.4	Clusterin OS=Rattus norvegicus OX=10116 GN=Clu PE=1 SV=2	427000	682885	523626	208711	468531	117437	496132	860944	1.21241e+06	618734	101024	400282
Q63009|ANM1_RAT;tr|A0A0G2K9I8|A0A0G2K9I8_RAT	3	3	122.98	0.470297	0.999949	1.61633	40522.4	Protein arginine N-methyltransferase 1 OS=Rattus norvegicus OX=10116 GN=Prmt1 PE=1 SV=1	110803	86384.2	108312	75407.6	184942	9377.14	21566.6	121168	43449.8	75773.4	72671.2	21254.5
tr|A0A0G2JZV3|A0A0G2JZV3_RAT;tr|B0BN26|B0BN26_RAT;tr|G3V8G1|G3V8G1_RAT	1	1	25.71	0.470624	0.999949	3.85098	136550	ATP/GTP-binding carboxypeptidase 1 OS=Rattus norvegicus OX=10116 GN=Agtpbp1 PE=3 SV=1	407.239	0	0	0	0	5399.92	0	5299.81	13925.1	0	3138.35	0
tr|D3ZCA0|D3ZCA0_RAT	2	1	62.38	0.471064	0.999949	1.19081	30104.6	Pyridoxal phosphate homeostasis protein OS=Rattus norvegicus OX=10116 GN=Plpbp PE=1 SV=1	183.866	306.005	44194.8	13.3009	108.939	371.675	3053.01	37.9565	116.544	714.118	47282	2595.66
Q08877|DYN3_RAT	18	7	736.28	0.471075	0.999949	1.02255	97914.3	Dynamin-3 OS=Rattus norvegicus OX=10116 GN=Dnm3 PE=1 SV=2	113455	52268.4	115923	401668	41068.4	9885.55	68818.9	124744	316765	84058.1	71748.5	84692.2
tr|D3Z981|D3Z981_RAT	32	18	1490.95	0.471127	0.999949	1.06424	213190	Plexin A1 OS=Rattus norvegicus OX=10116 GN=Plxna1 PE=1 SV=3	565004	401477	329688	546149	278539	735558	544754	716506	1.13166e+06	474485	8622.24	163870
P0DJJ3|SGIP1_RAT;tr|F1M1Y0|F1M1Y0_RAT	8	8	331.37	0.471214	0.999949	1.95303	88584.9	SH3-containing GRB2-like protein 3-interacting protein 1 OS=Rattus norvegicus OX=10116 GN=Sgip1 PE=1 SV=1	14649.3	13137.9	19464	7450.42	57556.4	4542.36	17596.3	15967.4	76399.6	2058.7	72184.4	43907.9
P11598|PDIA3_RAT;tr|A0A0H2UHM5|A0A0H2UHM5_RAT	57	52	3134.57	0.47123	0.999949	2.70358	56623.5	Protein disulfide-isomerase A3 OS=Rattus norvegicus OX=10116 GN=Pdia3 PE=1 SV=2	5.98083e+06	1.34427e+07	9.27137e+06	1.71837e+06	491423	1.86929e+06	9.2344e+06	2.01325e+07	4.62284e+07	1.14712e+07	679089	861395
tr|O78088|O78088_RAT;tr|Q31265|Q31265_RAT;tr|Q31267|Q31267_RAT;tr|Q95565|Q95565_RAT	1	1	44.15	0.471429	0.999949	163.611	38919.8	MHC class Ib molecule (Fragment) OS=Rattus norvegicus OX=10116 PE=2 SV=1	22.05	12.7657	16.2189	0	0.108596	0.264797	0	92.4177	0	0	8292.82	25.6648
tr|D4AD36|D4AD36_RAT	1	1	20.01	0.471468	0.999949	1.05423	76767.2	FCH and double SH3 domains 1 OS=Rattus norvegicus OX=10116 GN=Fchsd1 PE=1 SV=2	0	1274.63	602.407	18.9043	9127.69	127.532	1748.45	64.3827	713.833	551.86	35.6586	8641.72
tr|G3V7J1|G3V7J1_RAT	8	7	475.54	0.471587	0.999949	1.07608	105884	Calsyntenin-3 OS=Rattus norvegicus OX=10116 GN=Clstn3 PE=4 SV=1	47884.3	56275.9	20825	38679.5	112262	19614	7889.93	112913	3274.52	33656.6	17486.3	142806
tr|A0A0H2UHS9|A0A0H2UHS9_RAT	1	1	25.74	0.473049	0.999949	27.5238	89521.7	GRAM domain containing 1A, isoform CRA_a OS=Rattus norvegicus OX=10116 GN=Gramd1a PE=4 SV=1	0	0	0	0	2082.66	0	0	0	0	0	55715.8	1606.86
Q68FQ7|RPAP3_RAT	1	1	29.46	0.473442	0.999949	3.55268	74645.3	RNA polymerase II-associated protein 3 OS=Rattus norvegicus OX=10116 GN=Rpap3 PE=1 SV=1	0	106.536	38.2418	54.9954	78.6278	336.101	0	0	0	40.0723	2009.2	133.856
tr|D3ZUX5|D3ZUX5_RAT	3	2	76.85	0.473764	0.999949	3.22053	26434.6	Coiled-coil-helix-coiled-coil-helix domain containing 3 (Predicted), isoform CRA_a OS=Rattus norvegicus OX=10116 GN=Chchd3 PE=1 SV=1	131.726	10524.8	8107.59	482.746	1839.94	1011.97	13631.5	215.309	227.6	6548.19	41847.2	8699.94
tr|A0A0G2JTH7|A0A0G2JTH7_RAT;tr|F1M7B8|F1M7B8_RAT	1	1	36.22	0.474124	0.999949	1.09299	95638.3	Ubiquitin-protein ligase E3A OS=Rattus norvegicus OX=10116 GN=Ube3a PE=1 SV=1	8.09776	2246.85	9654.3	572.466	4256.43	52.6817	5053.66	346.619	482.259	1799.98	523.934	7155.77
tr|Q5XIP0|Q5XIP0_RAT	1	1	53.83	0.474128	0.999949	1.33926	37822	DnaJ (Hsp40) homolog, subfamily B, member 4 OS=Rattus norvegicus OX=10116 GN=Dnajb4 PE=1 SV=1	6.40527	9493.82	24021.8	83.6187	84794.9	52.7516	25347	714.344	70.7689	4578.01	7775.42	49961.5
tr|F1LVR0|F1LVR0_RAT	5	4	229.81	0.474438	0.999949	1.35877	36766.8	IgLON family member 5 OS=Rattus norvegicus OX=10116 GN=Iglon5 PE=4 SV=2	317723	391048	348534	25975.5	56270.5	465154	570007	339523	437415	646759	111657	75067.6
Q924N5|ACBG1_RAT	13	10	618.07	0.47462	0.999949	1.38961	80518.9	Long-chain-fatty-acid--CoA ligase ACSBG1 OS=Rattus norvegicus OX=10116 GN=Acsbg1 PE=1 SV=1	611937	573362	486916	212678	66731.4	572303	502519	787461	1.2963e+06	488595	262909	169500
P56745|CLD1_RAT	1	1	42.91	0.474753	0.999949	2.71067	22842.8	Claudin-1 OS=Rattus norvegicus OX=10116 GN=Cldn1 PE=1 SV=2	18.9148	3172.49	12524.7	50.2247	20538.1	21.9184	2749.03	28.6942	28.0123	218.397	0	10377.1
Q5PQL5|PTSS1_RAT;tr|A0A0G2JZJ5|A0A0G2JZJ5_RAT;tr|A0A0G2K2U0|A0A0G2K2U0_RAT	3	2	130.74	0.47524	0.999949	1.60369	55663.9	Phosphatidylserine synthase 1 OS=Rattus norvegicus OX=10116 GN=Ptdss1 PE=2 SV=1	6397.25	11822.2	7339.07	95747.9	15056.8	95791.4	2766.8	9103.32	92714.5	10205	5639.83	24333.4
Q80WA4|NOVA1_RAT;tr|A0A0G2JVE8|A0A0G2JVE8_RAT;tr|D4AAF8|D4AAF8_RAT;tr|F1M4H5|F1M4H5_RAT	1	1	34.86	0.476284	0.999949	2.39849	48443.9	RNA-binding protein Nova-1 (Fragment) OS=Rattus norvegicus OX=10116 GN=Nova1 PE=2 SV=1	106.103	1127.62	12957.6	21.311	983.999	9.56697	5577.94	23.5894	29.5176	616.034	21245.8	8979.07
Q63584|TMEDA_RAT	11	9	696.02	0.476404	0.999949	3.565	24857.7	Transmembrane emp24 domain-containing protein 10 OS=Rattus norvegicus OX=10116 GN=Tmed10 PE=1 SV=2	367604	1.37153e+06	920627	243681	197865	237496	475248	2.64852e+06	6.59674e+06	1.94748e+06	65298.5	169531
Q91ZW1|TFAM_RAT	2	1	54.98	0.476931	0.999949	3.52338	28186.8	Transcription factor A, mitochondrial OS=Rattus norvegicus OX=10116 GN=Tfam PE=2 SV=1	462.409	511.203	4232.81	740.117	845.735	271.882	1828.53	65.9058	1899.26	590.269	17365.6	3140.14
tr|A0A0G2JX24|A0A0G2JX24_RAT;tr|D3ZCJ7|D3ZCJ7_RAT	1	1	30.03	0.4788	0.999949	4.84544	27420.2	Ecotropic viral integration site 5-like (Fragment) OS=Rattus norvegicus OX=10116 GN=Evi5l PE=4 SV=1	2550.64	3406.23	20819.5	721.408	601.86	1040.79	35164.1	1374.94	122.04	952.554	44853.6	58730.8
P13086|SUCA_RAT;tr|A0A0H2UHE1|A0A0H2UHE1_RAT	14	11	823.54	0.479495	0.999949	1.3226	36148	Succinate--CoA ligase [ADP/GDP-forming] subunit alpha, mitochondrial OS=Rattus norvegicus OX=10116 GN=Suclg1 PE=2 SV=2	318925	323549	157590	72357.1	73340.8	397662	395065	221235	508844	330984	61680.2	259002
tr|A0A0G2K3I9|A0A0G2K3I9_RAT;tr|B5DFF7|B5DFF7_RAT;tr|G3V9L3|G3V9L3_RAT	4	2	174.37	0.479959	0.999949	2.23821	23076.1	Dual specificity protein phosphatase OS=Rattus norvegicus OX=10116 GN=Dusp3 PE=1 SV=1	1850.12	2541.09	282.909	61984.5	3184.03	1385.64	251.21	0	11771.2	1521.43	11681.7	6598.12
A2VD12|PBIP1_RAT	14	12	765.87	0.480077	0.999949	1.0625	80275.6	Pre-B-cell leukemia transcription factor-interacting protein 1 OS=Rattus norvegicus OX=10116 GN=Pbxip1 PE=1 SV=1	672572	1.12218e+06	369854	499553	1.3129e+06	1.57804e+06	727648	1.31239e+06	2.55956e+06	1.15116e+06	51894.4	99619
Q7TNK0|SERC1_RAT;tr|Q6QI17|Q6QI17_RAT	2	2	83.83	0.480681	0.999949	1.36922	50553.1	Serine incorporator 1 OS=Rattus norvegicus OX=10116 GN=Serinc1 PE=1 SV=1	328303	406870	91310.8	698171	643504	1.01382e+06	314453	201722	870243	322685	58128.9	556709
P13234|KCC4_RAT	3	2	89	0.480887	0.999949	1.26281	53151.2	Calcium/calmodulin-dependent protein kinase type IV OS=Rattus norvegicus OX=10116 GN=Camk4 PE=1 SV=3	238.579	2974.1	14196.8	1007.02	11071.5	120.168	16295.3	8895.33	1622.64	3660.94	211.175	6704.11
Q5RJQ0|CHST1_RAT	1	1	23.16	0.481	0.999949	5.16235	46885	Carbohydrate sulfotransferase 1 OS=Rattus norvegicus OX=10116 GN=Chst1 PE=2 SV=1	35.5004	933.922	2877.97	11.3945	3169.49	4606.88	1837.82	161.811	93.7487	446.941	33852.5	23672
A1A5P0|BORG5_RAT	1	1	34.14	0.481001	0.999949	250.31	41028.7	Cdc42 effector protein 1 OS=Rattus norvegicus OX=10116 GN=Cdc42ep1 PE=1 SV=1	0	5.1882	0	0	0	32.9912	0	54.7241	0	0	9501.96	0
tr|D3ZCF8|D3ZCF8_RAT;tr|D3ZXD2|D3ZXD2_RAT	2	1	64.31	0.481309	0.999949	5.06096	184893	ATP-binding cassette, subfamily A (ABC1), member 8a OS=Rattus norvegicus OX=10116 GN=Abca8a PE=1 SV=3	640.613	0	0	130.917	0	102.889	0	0	0	0	4425.4	0
tr|F1M5M9|F1M5M9_RAT	3	3	173.44	0.48154	0.999949	97.7376	124448	SLIT-ROBO Rho GTPase-activating protein 3 OS=Rattus norvegicus OX=10116 GN=Srgap3 PE=1 SV=2	38.9483	0.0660852	238.23	21.9689	9.85403	119.557	30.2199	47.5933	4.7962	0	36908.7	4901.4
Q9WU49|CHSP1_RAT	1	1	42.34	0.481771	0.999949	52.4078	15906.1	Calcium-regulated heat stable protein 1 OS=Rattus norvegicus OX=10116 GN=Carhsp1 PE=1 SV=1	0.178488	0.156888	0	0.209129	395.34	0.787249	0.0873574	86.6668	0	1.3341	20700.6	0
Q63259|PTPRN_RAT	4	3	155.52	0.481951	0.999949	2.17094	106228	Receptor-type tyrosine-protein phosphatase-like N OS=Rattus norvegicus OX=10116 GN=Ptprn PE=1 SV=2	82008.7	109751	68010	946.451	13855.8	21420.4	47121.6	168323	311941	91842.8	2908.68	20442.7
P27791|KAPCA_RAT;tr|A1L1M0|A1L1M0_RAT	11	1	491.22	0.482043	0.999949	2.56951	40619.7	cAMP-dependent protein kinase catalytic subunit alpha OS=Rattus norvegicus OX=10116 GN=Prkaca PE=1 SV=2	343361	56168	130409	24136.4	45056.8	1.0903e+06	83215.2	120321	340504	63846.1	26340	23265.2
P01041|CYTB_RAT	4	3	134.77	0.48255	0.999949	2.1528	11195.8	Cystatin-B OS=Rattus norvegicus OX=10116 GN=Cstb PE=1 SV=1	10525.4	3873.21	10770.9	13122.5	133458	17404.9	9546.15	13206.3	3735.19	4586.28	9237.84	47552.8
Q63633|S12A5_RAT;tr|D3ZGI9|D3ZGI9_RAT;tr|F1LNP4|F1LNP4_RAT	36	28	1752.86	0.483109	0.999949	1.56713	126246	Solute carrier family 12 member 5 OS=Rattus norvegicus OX=10116 GN=Slc12a5 PE=1 SV=2	3.493e+06	5.38205e+06	856381	868367	408900	178241	3.98959e+06	3.68911e+06	3.36755e+06	5.71455e+06	596553	174084
tr|A0A0G2K5L2|A0A0G2K5L2_RAT	25	24	1234.42	0.48339	0.999949	1.21983	34662.4	Mitochondrial glutamate carrier 1-like OS=Rattus norvegicus OX=10116 GN=LOC100911440 PE=1 SV=1	1.50261e+06	2.35463e+06	971989	162653	1.47829e+06	2.14238e+06	1.93823e+06	2.00718e+06	2.58346e+06	2.26261e+06	509142	1.20524e+06
Q63617|HYOU1_RAT	50	1	2900.42	0.483583	0.999949	2.63328	111289	Hypoxia up-regulated protein 1 OS=Rattus norvegicus OX=10116 GN=Hyou1 PE=1 SV=1	441687	1.01602e+06	1.0197e+06	254893	43037.1	211483	663141	2.41178e+06	3.57481e+06	1.00156e+06	41831.6	172006
tr|Q6P136|Q6P136_RAT	53	4	3143.19	0.483583	0.999949	2.63328	111220	Hyou1 protein OS=Rattus norvegicus OX=10116 GN=Hyou1 PE=1 SV=1	599507	1.37905e+06	1.38405e+06	345970	58414.8	287049	900090	3.27354e+06	4.85214e+06	1.35943e+06	56778.6	233466
tr|A9UMV9|A9UMV9_RAT	8	7	350.86	0.483739	0.999949	1.16023	12500.5	Complex I-B14.5a OS=Rattus norvegicus OX=10116 GN=Ndufa7 PE=1 SV=1	251239	676779	242257	336527	462490	631751	277314	459672	666425	513881	72033.6	252508
tr|A0A096MIZ1|A0A096MIZ1_RAT	4	2	102.7	0.484575	0.999949	1.64674	42055.1	Paralemmin 2 OS=Rattus norvegicus OX=10116 GN=Palm2 PE=1 SV=1	29325.8	11530.7	15253	7611.44	10079.5	2417.74	10340.1	8020.02	5562.88	18931.4	68979.5	13677.5
B4F7E8|NIBA2_RAT;tr|Q3MHT9|Q3MHT9_RAT	1	1	33.64	0.484724	0.999949	1.4891	84730.6	Protein Niban 2 OS=Rattus norvegicus OX=10116 GN=Niban2 PE=1 SV=1	24.0286	394.312	1588.21	40.6205	11168.4	295.3	1422.69	0	21.2111	194.382	67.6714	7367.22
P09215|KPCD_RAT;Q9WTQ0|KPCT_RAT;tr|A0A140UHX0|A0A140UHX0_RAT;tr|D4A0U0|D4A0U0_RAT;tr|F1LM10|F1LM10_RAT	2	1	95.05	0.484759	0.999949	1.26826	77520.4	Protein kinase C delta type OS=Rattus norvegicus OX=10116 GN=Prkcd PE=1 SV=1	9.94412	5929.76	62021.5	10.8823	56852.5	76.7266	29591.7	101.42	63.6326	4522.79	17298.8	106828
tr|D4ACG2|D4ACG2_RAT	12	12	657.64	0.484842	0.999949	1.40084	72270	2-hydroxyacyl-CoA lyase 2 OS=Rattus norvegicus OX=10116 GN=Ilvbl PE=1 SV=1	172464	324849	263100	651298	139376	60352.3	66335.7	117031	380856	358656	167266	60192.5
P24329|THTR_RAT	3	2	134.78	0.484932	0.999949	1.11026	33406.7	Thiosulfate sulfurtransferase OS=Rattus norvegicus OX=10116 GN=Tst PE=1 SV=3	217372	254844	178929	212646	228049	125277	209605	201665	96472.9	262853	136375	189276
Q6AY84|SCRN1_RAT	8	6	325.38	0.485142	0.999949	1.43751	46396.1	Secernin-1 OS=Rattus norvegicus OX=10116 GN=Scrn1 PE=1 SV=1	60825.2	21323.5	26855.3	17388	23796.5	9816.07	48636.5	50085.9	10636.2	20782.1	81748.5	18118.9
P50399|GDIB_RAT	34	16	2056.08	0.485162	0.999949	1.04989	50537.2	Rab GDP dissociation inhibitor beta OS=Rattus norvegicus OX=10116 GN=Gdi2 PE=1 SV=2	1.22736e+06	478010	668600	859909	1.24496e+06	1.72892e+06	516344	1.69305e+06	2.20497e+06	497746	97420.7	903267
P51792|CLCN3_RAT;tr|A0A0G2K2K6|A0A0G2K2K6_RAT	10	5	453.74	0.485187	0.999949	1.64601	90855	H(+)/Cl(-) exchange transporter 3 OS=Rattus norvegicus OX=10116 GN=Clcn3 PE=2 SV=2	13105.7	20811.1	8963.62	287586	19375.3	40453.3	58449.7	20645.7	28180.7	14906.6	468707	51541.9
tr|M0RD40|M0RD40_RAT	3	3	88.67	0.485508	0.999949	13.9952	145993	Non-specific serine/threonine protein kinase OS=Rattus norvegicus OX=10116 GN=Sik3 PE=1 SV=2	585.181	636.519	3115.15	33.3089	1013.85	200.178	1732.72	93.75	42.2658	524.42	66340.4	9418.28
P49187|MK10_RAT;tr|A0A0U1RRS7|A0A0U1RRS7_RAT;tr|A0A0U1RVI2|A0A0U1RVI2_RAT	4	2	165.97	0.485919	0.999949	1.15606	52532.5	Mitogen-activated protein kinase 10 OS=Rattus norvegicus OX=10116 GN=Mapk10 PE=1 SV=3	43642.5	15289.4	2804.72	3903.04	1459.61	2264.18	6357.06	28269.7	5298.56	11852.6	26797.7	1612.87
tr|A0A0G2JZZ4|A0A0G2JZZ4_RAT	4	2	176.42	0.485925	0.999949	1.75241	16209.8	Selenoprotein M OS=Rattus norvegicus OX=10116 GN=Selenom PE=1 SV=1	159076	272774	197583	20232.8	12883	18508.3	46159	467143	352891	248823	11168.9	67304.8
Q9Z250|LIN7A_RAT;tr|F1LQV9|F1LQV9_RAT;tr|M0R7K1|M0R7K1_RAT	3	2	91.32	0.486104	0.999949	1.07179	25864.6	Protein lin-7 homolog A OS=Rattus norvegicus OX=10116 GN=Lin7a PE=1 SV=2	146638	116849	213746	102861	96856.9	58986	113922	201115	208738	112728	16890.2	33246.8
D3ZFD0|MY18A_RAT;tr|A0A0G2JY08|A0A0G2JY08_RAT	3	3	95.79	0.48652	0.999949	11.4528	232666	Unconventional myosin-XVIIIa OS=Rattus norvegicus OX=10116 GN=Myo18a PE=1 SV=2	83.9196	943.28	531.322	48.7089	593.166	1112.85	384.974	734.366	19.5071	692.605	34822.4	1292.02
Q9WVB1|RAB6A_RAT;tr|A0A0H2UHP9|A0A0H2UHP9_RAT	8	1	334.82	0.48684	0.999949	1.30206	23589.8	Ras-related protein Rab-6A OS=Rattus norvegicus OX=10116 GN=Rab6a PE=1 SV=2	73363.1	46968	54648.8	37503.5	403265	75882.3	60308.4	29361.1	49472.4	59701.4	10855.1	321483
O08679|MARK2_RAT;tr|A0A0G2K6X6|A0A0G2K6X6_RAT	4	3	148.16	0.487479	0.999949	12.5338	80871.9	Serine/threonine-protein kinase MARK2 OS=Rattus norvegicus OX=10116 GN=Mark2 PE=1 SV=1	102087	62957.6	56636	5.76414e+06	212250	17793.4	129300	63303.5	39684.9	93759.4	84572.7	85309.9
Q5SGE0|LPPRC_RAT;tr|F1LM33|F1LM33_RAT	10	9	350.57	0.487769	0.999949	1.23465	156652	Leucine-rich PPR motif-containing protein, mitochondrial OS=Rattus norvegicus OX=10116 GN=Lrpprc PE=1 SV=1	324846	370801	73648	205882	340474	451155	267283	275974	345246	333561	14831.6	194118
Q6QIX3|ZNT3_RAT	6	5	197.69	0.487796	0.999949	4.07771	41898.4	Zinc transporter 3 OS=Rattus norvegicus OX=10116 GN=Slc30a3 PE=1 SV=1	39154	46887	73556.8	1.23521e+06	49470.3	816918	92246.5	116570	133254	42065.8	115892	54498.9
Q6P7Q4|LGUL_RAT	10	9	392.5	0.488114	0.999949	1.01144	20819.6	Lactoylglutathione lyase OS=Rattus norvegicus OX=10116 GN=Glo1 PE=1 SV=3	504777	315919	487056	344005	205182	344673	429132	587567	612845	422823	63040.3	61301
tr|Q8R490|Q8R490_RAT	10	10	513.47	0.488244	0.999949	1.0187	78085.6	Cadherin-13 OS=Rattus norvegicus OX=10116 GN=Cdh13 PE=1 SV=1	1.61606e+06	3.20222e+06	2.18385e+06	742158	1.41741e+06	619207	3.33128e+06	1.8411e+06	1.30836e+06	2.71253e+06	37599.6	370480
tr|D4A0T8|D4A0T8_RAT	9	6	533.08	0.488814	0.999949	1.48591	38493.8	Dehydrogenase/reductase 7 OS=Rattus norvegicus OX=10116 GN=Dhrs7 PE=1 SV=3	67751.6	115678	81880.4	25566.6	202362	159326	35432	243810	137439	120678	359672	72620.5
tr|F1LML0|F1LML0_RAT;tr|F1LPV0|F1LPV0_RAT;tr|Q6TUD1|Q6TUD1_RAT	3	3	103.28	0.489163	0.999949	20.7042	58303.6	Asparagine--tRNA ligase OS=Rattus norvegicus OX=10116 GN=Nars PE=1 SV=1	1161.25	545.22	1236.05	6104.94	570.989	903.526	1285.88	506.881	2468.68	665.059	212134	788.315
P54690|BCAT1_RAT;tr|Q99JD5|Q99JD5_RAT;tr|Q9R170|Q9R170_RAT	4	4	229.45	0.489251	0.999949	1.10159	46045.8	Branched-chain-amino-acid aminotransferase, cytosolic OS=Rattus norvegicus OX=10116 GN=Bcat1 PE=1 SV=1	1.0854e+06	378887	301207	1.35588e+06	627118	1.44904e+06	752301	1.5678e+06	1.50851e+06	442660	23513.5	423432
P70627|FOLH1_RAT;tr|G3V7S0|G3V7S0_RAT	10	9	397.37	0.489423	0.999949	1.55343	84539.8	Glutamate carboxypeptidase 2 OS=Rattus norvegicus OX=10116 GN=Folh1 PE=1 SV=1	226919	278525	179589	138079	24186.3	180078	179101	431870	380646	448563	44014.1	111763
Q6AYG3|PRUN1_RAT	3	3	117.04	0.489643	0.999949	23.4408	49998.4	Exopolyphosphatase PRUNE1 OS=Rattus norvegicus OX=10116 GN=Prune1 PE=1 SV=1	245.157	184.228	899.865	52.6983	683.554	24.0841	1503.71	13.5957	44.6503	160.872	45651.8	1606.81
Q568Y7|NOE2_RAT	5	3	175.17	0.489723	0.999949	1.76902	53870.2	Noelin-2 OS=Rattus norvegicus OX=10116 GN=Olfm2 PE=1 SV=1	20973.8	40327.6	50102.3	17962	20717.2	74294.2	71656.4	56096.9	183373	56941.3	14453	14408.1
tr|Q505J7|Q505J7_RAT	2	2	53.21	0.489933	0.999949	1.15523	49295	Galactose-3-O-sulfotransferase 3 OS=Rattus norvegicus OX=10116 GN=Gal3st3 PE=2 SV=1	2878.36	2929.83	1612.95	702.841	2577.06	254.97	3501.6	1706.93	789.019	2364.78	2898.75	1395.66
tr|F1LMV9|F1LMV9_RAT	2	1	52.85	0.490038	0.999949	1.54374	54964.5	Coronin OS=Rattus norvegicus OX=10116 GN=Coro2b PE=3 SV=3	0	7515.2	46136.2	8.19521	9565.97	0	20864.3	3220.35	0	6641.24	327.208	9902.88
tr|D3Z955|D3Z955_RAT	8	8	317.24	0.491036	0.999949	5.11045	70234.5	Phosphoglucomutase 2-like 1 OS=Rattus norvegicus OX=10116 GN=Pgm2l1 PE=1 SV=1	4948.1	3516.08	2982.99	12436.1	5469.87	3297.95	2231.64	2747.02	10455	4688.84	142109	4630.53
Q99P74|RB27B_RAT	3	2	110.28	0.49108	0.999949	22.8661	24619.9	Ras-related protein Rab-27B OS=Rattus norvegicus OX=10116 GN=Rab27b PE=2 SV=3	1502.15	69.3769	17.1731	764.407	11.9801	1472.44	48.4765	2286.23	160.42	90.7969	85062.8	100.385
tr|D4ACH5|D4ACH5_RAT	1	1	36.63	0.491517	0.999949	3.16334	36785.8	Elongation of very long chain fatty acids protein 4 OS=Rattus norvegicus OX=10116 GN=Elovl4 PE=3 SV=1	128241	213676	176680	219893	93977.5	40085.6	202810	371444	1.68585e+06	322073	12307.3	165699
P63329|PP2BA_RAT	24	10	1060.27	0.491839	0.999949	1.0661	58643.9	Serine/threonine-protein phosphatase 2B catalytic subunit alpha isoform OS=Rattus norvegicus OX=10116 GN=Ppp3ca PE=1 SV=1	2.99092e+06	1.67859e+06	2.74112e+06	1.12664e+06	473992	2.20682e+06	2.23754e+06	2.49545e+06	3.75055e+06	1.68713e+06	159442	192400
tr|A0A0G2K7V9|A0A0G2K7V9_RAT;tr|A0A0G2K8S0|A0A0G2K8S0_RAT;tr|B5DFK8|B5DFK8_RAT;tr|F1M024|F1M024_RAT;tr|G3V6B0|G3V6B0_RAT	2	2	80.72	0.492007	0.999949	48.537	70623.4	Uncharacterized protein OS=Rattus norvegicus OX=10116 PE=1 SV=1	31.4268	223.544	150.079	0	8.76982	0	0	1.53807	26.8573	309.613	19690.7	56.8659
tr|A0A0G2JY43|A0A0G2JY43_RAT;tr|G3V9W6|G3V9W6_RAT	23	20	1024.41	0.492275	0.999949	1.6303	65388	Aldehyde dehydrogenase family 3 member A2 OS=Rattus norvegicus OX=10116 GN=Aldh3a2 PE=1 SV=1	546750	1.11716e+06	495345	360987	1.15945e+06	174549	703895	1.79448e+06	2.11149e+06	1.19427e+06	264466	214989
tr|D3ZDX5|D3ZDX5_RAT	15	11	534.98	0.492514	0.999949	1.46813	231809	Plexin B1 OS=Rattus norvegicus OX=10116 GN=Plxnb1 PE=1 SV=1	94527.5	138363	71660.9	572913	152593	338654	235153	268624	113340	140037	23206.8	151919
Q6J4I0|PPR1B_RAT	6	5	235.08	0.492749	0.999949	1.57424	22912.5	Protein phosphatase 1 regulatory subunit 1B OS=Rattus norvegicus OX=10116 GN=Ppp1r1b PE=1 SV=1	120904	36614.9	213033	30390.6	37536.2	271157	35425.7	50188.7	174992	28770.1	134936	26466.6
Q32WR5|BL1S2_RAT;tr|A0SXU1|A0SXU1_RAT	1	1	24.27	0.49288	0.999949	1.07699	16067.2	Biogenesis of lysosome-related organelles complex-1 subunit 2 OS=Rattus norvegicus OX=10116 GN=Bloc1s2 PE=2 SV=1	11837	61.4692	6003.14	1080.51	13639.5	2961.88	1936.5	95.9512	58.5715	342.538	29049.3	6840.27
P59215|GNAO_RAT	60	43	3550.33	0.493017	0.999949	1.25548	40068.6	Guanine nucleotide-binding protein G(o) subunit alpha OS=Rattus norvegicus OX=10116 GN=Gnao1 PE=1 SV=2	2.76947e+07	1.37745e+07	2.68156e+07	1.05682e+07	593884	1.58258e+07	1.83692e+07	1.6862e+07	2.72625e+07	1.26588e+07	232332	500520
Q5XIP9|TMM43_RAT	6	6	245.18	0.493281	0.999949	2.46821	44774.4	Transmembrane protein 43 OS=Rattus norvegicus OX=10116 GN=Tmem43 PE=2 SV=1	152828	203276	139161	62026	3281.89	22125.1	213990	376954	635743	187690	8074.44	15771
tr|B0BN52|B0BN52_RAT	25	24	1384.75	0.493326	0.999949	2.21094	33528.2	Mitochondrial carrier 2 OS=Rattus norvegicus OX=10116 GN=Mtch2 PE=2 SV=1	1.17447e+06	1.78316e+06	1.0034e+06	405251	267193	359741	1.24478e+06	1.55309e+06	5.54045e+06	1.73514e+06	80297.8	885935
tr|A0A0G2K0Q8|A0A0G2K0Q8_RAT;tr|D3ZEV8|D3ZEV8_RAT	6	4	216.54	0.493421	0.999949	1.14457	90675.4	Sushi domain-containing 2 OS=Rattus norvegicus OX=10116 GN=Susd2 PE=1 SV=1	335697	362562	174422	240019	117981	103563	126780	248573	344449	319734	25689.3	100487
O54921|EXOC2_RAT;tr|A0A0G2K1K8|A0A0G2K1K8_RAT;tr|A0A0G2K888|A0A0G2K888_RAT;tr|F1LMB9|F1LMB9_RAT	2	1	50.97	0.493645	0.999949	1.33107	104031	Exocyst complex component 2 OS=Rattus norvegicus OX=10116 GN=Exoc2 PE=1 SV=1	61.7107	5707.5	6420.88	38.7447	259.901	48.312	1577.87	106.905	24.0683	2495.45	8556.79	3926.6
tr|D4A7Z5|D4A7Z5_RAT;tr|Q5RK17|Q5RK17_RAT	2	2	63.31	0.494031	0.999949	13.4714	28771.7	Diablo homolog, mitochondrial OS=Rattus norvegicus OX=10116 GN=LOC100360940 PE=4 SV=2	183.563	55.7754	11562.5	1260.11	55.9091	145.841	330.649	445.263	181.98	78.6154	176306	1336.88
Q9JJ31|CUL5_RAT;tr|A0A0H2UHG3|A0A0H2UHG3_RAT	5	4	159.04	0.49478	0.999949	2.24253	90890.2	Cullin-5 OS=Rattus norvegicus OX=10116 GN=Cul5 PE=1 SV=3	19337.5	547.488	757.227	10666.5	13927.6	8295.95	1523.18	333.501	323.83	343.423	105839	11685.1
P07687|HYEP_RAT	8	5	278.04	0.495235	0.999949	1.10949	52581.7	Epoxide hydrolase 1 OS=Rattus norvegicus OX=10116 GN=Ephx1 PE=1 SV=1	56700.7	108521	72674.3	441245	19528.4	22116.3	66621.9	169030	331454	83868.3	122007	26725.7
tr|G3V6P8|G3V6P8_RAT	4	4	187.23	0.495384	0.999949	1.05312	7985.17	Guanine nucleotide-binding protein subunit gamma OS=Rattus norvegicus OX=10116 GN=Gng12 PE=1 SV=1	1.06584e+06	537333	707138	918848	483608	806479	624596	1.31271e+06	1.25507e+06	546349	117961	434625
Q5PQX1|TOIP1_RAT	1	1	62.63	0.495809	0.999949	9.48187	65649.1	Torsin-1A-interacting protein 1 OS=Rattus norvegicus OX=10116 GN=Tor1aip1 PE=1 SV=1	29804.2	8349.39	15419.8	11962.5	41748.7	3452.63	43113.9	9301.37	966498	16940	4077.61	10066.4
P70500|CDIPT_RAT	8	8	441.49	0.496508	0.999949	1.24053	23612.9	CDP-diacylglycerol--inositol 3-phosphatidyltransferase OS=Rattus norvegicus OX=10116 GN=Cdipt PE=1 SV=1	882154	2.20747e+06	1.54659e+06	2.97853e+06	2.37554e+06	2.39192e+06	1.53818e+06	3.14297e+06	8.14837e+06	2.12889e+06	219664	182432
P36365|FMO1_RAT	3	3	128.54	0.496745	0.999949	2.02658	59825.4	Dimethylaniline monooxygenase [N-oxide-forming] 1 OS=Rattus norvegicus OX=10116 GN=Fmo1 PE=1 SV=2	65040.3	80381.5	43546.2	99921.6	33002.4	21049.4	22794.6	10833	214189	169308	159186	118689
tr|A0A096MJG4|A0A096MJG4_RAT;tr|F1LQP7|F1LQP7_RAT	3	3	90.43	0.496904	0.999949	1.59181	70353.6	Cartilage acidic protein 1 OS=Rattus norvegicus OX=10116 GN=Crtac1 PE=4 SV=1	59266.7	71544.1	37331.5	31718.1	40700	21864.3	69613.5	92630.6	118765	79122.8	48656.7	8940.75
tr|A0A0G2K952|A0A0G2K952_RAT;tr|D3ZBB7|D3ZBB7_RAT	1	1	55.87	0.496954	0.999949	22.3864	185650	Ubiquitinyl hydrolase 1 OS=Rattus norvegicus OX=10116 GN=Usp32 PE=1 SV=1	59.1729	530.72	180.77	0	245.187	303.644	1241.49	8.22291	2.96618	550.805	27035.2	699.951
Q75Q41|TOM22_RAT	6	5	313.86	0.49706	0.999949	1.16799	15490.6	Mitochondrial import receptor subunit TOM22 homolog OS=Rattus norvegicus OX=10116 GN=Tomm22 PE=1 SV=1	198837	324698	250249	112858	469164	171665	256319	98113.1	403181	294953	44305.4	210908
Q4KLL0|TCEA1_RAT	1	1	54.69	0.497362	0.999949	4.00749	33893.5	Transcription elongation factor A protein 1 OS=Rattus norvegicus OX=10116 GN=Tcea1 PE=1 SV=1	842.428	154.825	470.991	216.551	99.2392	5809.78	38.3299	0	129.256	112.431	29066.2	1085.9
D3ZNF5|CSC1_RAT	1	1	34.05	0.497623	0.999949	8.25169	92962.1	Calcium permeable stress-gated cation channel 1 OS=Rattus norvegicus OX=10116 GN=Tmem63c PE=1 SV=1	0	0	506.088	0	115.778	11.6539	36.5103	0	0	78.0987	5039.29	73.7165
P33671|SDC3_RAT;tr|G3V9B7|G3V9B7_RAT	1	1	52.33	0.497652	0.999949	1.18316	45919.5	Syndecan-3 OS=Rattus norvegicus OX=10116 GN=Sdc3 PE=1 SV=3	3.41353	6625.19	40904.5	23.894	43970.8	23.8173	11797.8	33.2085	62.7037	4449.84	38015	53962
Q9Z1Y3|CADH2_RAT;tr|G3V803|G3V803_RAT	2	2	68.57	0.497859	0.999949	1.30336	99686.1	Cadherin-2 OS=Rattus norvegicus OX=10116 GN=Cdh2 PE=1 SV=1	15939.8	129267	101053	10240.3	14899.4	5772.01	20726.1	167448	53860.3	69590	6076.28	43552.2
Q5XII0|EPDR1_RAT	6	6	255.59	0.498164	0.999949	1.23609	25639.4	Mammalian ependymin-related protein 1 OS=Rattus norvegicus OX=10116 GN=Epdr1 PE=1 SV=1	964296	1.18325e+06	214770	75230.3	674877	953311	1.0163e+06	1.15121e+06	1.2888e+06	1.02519e+06	265407	278731
tr|D3ZXS8|D3ZXS8_RAT	5	4	164.86	0.498208	0.999949	2.04605	22406.6	E2 ubiquitin-conjugating enzyme OS=Rattus norvegicus OX=10116 GN=Ube2k PE=1 SV=1	140791	221434	148844	14008.6	496871	183050	108942	62191.4	79884.7	84851.7	153073	99997.2
P70579|GRM8_RAT;tr|F1LRA6|F1LRA6_RAT	4	3	102.38	0.498355	0.999949	1.44101	101867	Metabotropic glutamate receptor 8 OS=Rattus norvegicus OX=10116 GN=Grm8 PE=1 SV=1	1035.91	5590.41	2560.47	1139.95	6293.01	6063.64	3655.97	1930.19	1781.57	4535.88	407.031	3430.7
tr|D3ZAW4|D3ZAW4_RAT	1	1	42.01	0.498397	0.999949	1.17422	40368.3	Abhydrolase domain containing 4 (Predicted) OS=Rattus norvegicus OX=10116 GN=Abhd4 PE=1 SV=1	22.0764	5569.71	30833.3	21.0049	44634.8	305.286	11741.6	290.085	461.918	4857.23	2680.83	49279.3
tr|A0A0G2JTS9|A0A0G2JTS9_RAT;tr|D4AE47|D4AE47_RAT	1	1	43.98	0.498431	0.999949	5.89137	77797.7	F-box protein 42 OS=Rattus norvegicus OX=10116 GN=Fbxo42 PE=4 SV=1	783.544	0	0	62.5429	53.9724	51.7927	0	0	0	0	5583.61	24.1052
P63326|RS10_RAT;tr|A0A0H2UI18|A0A0H2UI18_RAT;tr|D3ZJY5|D3ZJY5_RAT;tr|F1LT36|F1LT36_RAT	3	3	119.48	0.498459	0.999949	1.04214	18915.7	40S ribosomal protein S10 OS=Rattus norvegicus OX=10116 GN=Rps10 PE=2 SV=1	47750.4	104777	64845.7	45741.4	52676.1	53082.9	34031.8	78060.4	107856	90286.7	7335.23	36386.6
tr|A0A0A6YYM0|A0A0A6YYM0_RAT	18	17	781.23	0.498965	0.999949	1.01877	80995.9	Long-chain-fatty-acid--CoA ligase 6 OS=Rattus norvegicus OX=10116 GN=Acsl6 PE=1 SV=2	204481	678852	421061	768870	462586	711185	209066	1.03007e+06	1.10117e+06	602363	92848.4	151708
P97836|DLGP1_RAT;tr|G3V849|G3V849_RAT	1	1	28.82	0.499038	0.999949	1.832	110178	Disks large-associated protein 1 OS=Rattus norvegicus OX=10116 GN=Dlgap1 PE=1 SV=1	2817.63	17880	47301.5	104208	12614.7	775.65	59863.9	10324.5	5016.93	12906.6	10.4847	13186
tr|G3V9U0|G3V9U0_RAT	4	3	181.23	0.49905	0.999949	1.92494	78888	Propionate--CoA ligase OS=Rattus norvegicus OX=10116 GN=Acss2 PE=1 SV=1	384120	163807	540201	263762	1.10804e+06	2.59573e+06	209861	306373	665489	237912	632236	574533
Q63377|AT1B3_RAT	14	12	831.35	0.499078	0.999949	1.09056	31829.7	Sodium/potassium-transporting ATPase subunit beta-3 OS=Rattus norvegicus OX=10116 GN=Atp1b3 PE=1 SV=1	3.51614e+06	5.36504e+06	2.48183e+06	418999	28539.4	1.87973e+06	2.78218e+06	4.19062e+06	1.82877e+06	4.83286e+06	747605	548039
tr|D3ZQL1|D3ZQL1_RAT	6	5	343.44	0.49939	0.999949	1.25191	26440.6	ER membrane protein complex subunit 7 OS=Rattus norvegicus OX=10116 GN=Emc7 PE=1 SV=3	483881	1.41357e+06	801173	944876	152934	126517	920752	1.77547e+06	353842	1.15408e+06	385188	321839
tr|D4AD29|D4AD29_RAT	1	1	28.97	0.499408	0.999949	1.0583	10706.1	Late endosomal/lysosomal adaptor and MAPK and MTOR activator 4 OS=Rattus norvegicus OX=10116 GN=Lamtor4 PE=1 SV=1	18017	29418	24360.9	47727.8	85636.3	6464.34	42173.5	43284.9	14687.4	35444.1	47637.5	40735.6
tr|A0A0U1RRX4|A0A0U1RRX4_RAT;tr|F1MAQ5|F1MAQ5_RAT	62	55	3424.45	0.499565	0.999949	1.34122	198903	Microtubule-associated protein OS=Rattus norvegicus OX=10116 GN=Map2 PE=1 SV=1	2.36099e+06	1.57353e+06	807330	718863	2.26747e+06	407959	1.5973e+06	759137	361906	1.46979e+06	373918	1.50419e+06
tr|D3ZM03|D3ZM03_RAT;tr|M0R3M6|M0R3M6_RAT	1	1	32.85	0.499855	0.999949	3.33366	11381.2	Vacuolar ATPase assembly integral membrane protein VMA21 OS=Rattus norvegicus OX=10116 GN=LOC100912478 PE=1 SV=1	126.914	14159.9	41343.3	1002.7	22008.7	292.414	15589.8	2831.67	50.8345	11134.5	152579	80953.4
P58200|VTI1B_RAT;tr|F1LNC4|F1LNC4_RAT	6	6	252.42	0.499856	0.999949	1.12331	26703.5	Vesicle transport through interaction with t-SNAREs homolog 1B OS=Rattus norvegicus OX=10116 GN=Vti1b PE=1 SV=2	249749	194813	122653	88083.7	362930	389360	174575	340416	463945	156242	96967.1	20923.6
tr|Q6AY21|Q6AY21_RAT	2	2	77.8	0.499908	0.999949	2.01079	50770.3	G3BP stress granule assembly factor 2 OS=Rattus norvegicus OX=10116 GN=G3bp2 PE=1 SV=1	818.098	1349.02	14099.5	524.246	5973.12	1231.64	3914.46	467.772	2143.2	1248.03	12956.1	27520.6
tr|G3V6H0|G3V6H0_RAT	12	3	503.63	0.500266	0.999949	1.47971	22177.1	RCG48149, isoform CRA_b OS=Rattus norvegicus OX=10116 GN=LOC100363782 PE=1 SV=1	176177	520406	361241	915029	1.05795e+06	2.13478e+06	461357	905300	1.23095e+06	504909	130204	258225
tr|B5DF14|B5DF14_RAT;tr|F7ESR8|F7ESR8_RAT	2	1	54.89	0.500466	0.999949	1.41052	61954.9	Lgi2 protein OS=Rattus norvegicus OX=10116 GN=Lgi2 PE=2 SV=1	193.54	12453.7	33061.3	45.063	27239.5	513.012	33181.5	3910.46	2259	15300.1	109.755	48920.8
Q6AY30|SCPDL_RAT	21	20	1210.59	0.500634	0.999949	1.01341	47088.2	Saccharopine dehydrogenase-like oxidoreductase OS=Rattus norvegicus OX=10116 GN=Sccpdh PE=1 SV=1	1.40896e+06	1.3386e+06	835189	1.00524e+06	1.4437e+06	2.40914e+06	1.45942e+06	1.88472e+06	2.77247e+06	1.45138e+06	62381.3	698803
tr|M0RAG0|M0RAG0_RAT	1	1	31.49	0.500759	0.999949	1.86966	51309.2	Transmembrane protein 151A OS=Rattus norvegicus OX=10116 GN=Tmem151a PE=1 SV=1	703.686	7520.96	1027.05	2204.6	15628.3	1524.92	2170.79	32535.5	2841.97	5642.27	589.392	9710.11
Q66H88|PLPP6_RAT	2	2	64.66	0.501142	0.999949	1.32579	31700.2	Phospholipid phosphatase 6 OS=Rattus norvegicus OX=10116 GN=Plpp6 PE=2 SV=1	5162.77	8904.08	21268.6	19184.6	9614.38	37158	7304.92	21270.1	43994.8	7765.15	28153.3	25804.2
P70566|TMOD2_RAT	3	3	118.94	0.50123	0.999949	2.73751	39491.8	Tropomodulin-2 OS=Rattus norvegicus OX=10116 GN=Tmod2 PE=1 SV=1	1.07553e+06	398039	250945	490835	115922	127729	2.27312e+06	1.91717e+06	1.65667e+06	753384	42928.1	88285.3
tr|A0A0G2JTN4|A0A0G2JTN4_RAT;tr|D4AB17|D4AB17_RAT	3	3	124.01	0.50128	0.999949	1.13068	144392	Formylglycinamide ribonucleotide amidotransferase OS=Rattus norvegicus OX=10116 GN=Pfas PE=1 SV=1	186.676	1901.24	13274.8	157.494	28327.6	62.7255	7572.34	190.44	940.347	1393.93	5684.86	23053.6
P40307|PSB2_RAT	5	5	196.65	0.501394	0.999949	1.16046	22912.4	Proteasome subunit beta type-2 OS=Rattus norvegicus OX=10116 GN=Psmb2 PE=1 SV=1	509014	258993	186201	449888	359234	1.03249e+06	497457	489645	737905	301758	13970.9	368498
P31722|C1QC_RAT;tr|A0A0H2UHK1|A0A0H2UHK1_RAT;tr|A0A3B0IYY4|A0A3B0IYY4_RAT	1	1	22.68	0.50153	0.999949	1.00568	25686	Complement C1q subcomponent subunit C OS=Rattus norvegicus OX=10116 GN=C1qc PE=1 SV=2	419.529	9747.7	394.52	356.372	1807.12	2352.59	3797.59	361.003	0	4882.58	189.834	5761.73
tr|Q6AY58|Q6AY58_RAT	4	4	222.24	0.501609	0.999949	2.55992	27911.5	B-cell receptor-associated protein OS=Rattus norvegicus OX=10116 GN=Bcap31 PE=1 SV=1	224167	332511	268380	154923	71436.5	59498.8	107430	285166	1.93646e+06	346537	83015.8	85246.4
tr|D4A7Q6|D4A7Q6_RAT	1	1	35.69	0.501632	0.999949	5.74407	19145.2	Uncharacterized protein RGD1564862_predicted OS=Rattus norvegicus OX=10116 GN=Zfp428 PE=4 SV=2	0	0	0	17.5224	162.274	1803.11	0	1.14691	7.93013	262.869	10822.8	295.213
tr|F1LX55|F1LX55_RAT	1	1	61.83	0.501814	0.999949	1.2956	109130	EPH receptor A10 OS=Rattus norvegicus OX=10116 GN=Epha10 PE=4 SV=3	11.8426	30.9306	47.8674	0.265983	11629.8	53.5753	1047.79	34.7848	19.2498	408.513	4.43962	7573.06
A9CMA6|TM163_RAT	3	2	92.37	0.502501	0.999949	1.43997	31344.5	Transmembrane protein 163 OS=Rattus norvegicus OX=10116 GN=Tmem163 PE=1 SV=1	55814.3	89942.9	65234	13921.7	2323.27	31304.8	29362.1	77806.2	167406	67940.7	14633.9	15141.2
Q62746|SYT6_RAT;tr|A0A0G2JW68|A0A0G2JW68_RAT	5	5	202.54	0.502757	0.999949	1.05077	57178.8	Synaptotagmin-6 OS=Rattus norvegicus OX=10116 GN=Syt6 PE=1 SV=1	56623.1	64349.4	35122.2	6467.88	29542.1	6842.5	10429	7048.9	4960.03	69936	93161.6	3799.76
P80201|ACVR1_RAT;tr|A0A0G2K2P7|A0A0G2K2P7_RAT;tr|B3DM96|B3DM96_RAT	1	1	43.4	0.503171	0.999949	2.40474	57194.9	Activin receptor type-1 OS=Rattus norvegicus OX=10116 GN=Acvr1 PE=2 SV=1	17.4126	1120	1864.42	36.86	14801.5	5777.7	2572.74	185.878	253.582	596.749	35734.5	17451.4
P37805|TAGL3_RAT	7	4	302.09	0.50327	0.999949	1.44686	22500.7	Transgelin-3 OS=Rattus norvegicus OX=10116 GN=Tagln3 PE=1 SV=2	1.10055e+06	838472	1.03821e+06	91498.2	1.08739e+06	829446	525302	851691	817597	562305	52766.1	636121
P24942|EAA1_RAT;tr|A0A0G2KAS7|A0A0G2KAS7_RAT;tr|G3V846|G3V846_RAT	31	28	1870.44	0.504169	0.999949	1.54269	59697.6	Excitatory amino acid transporter 1 OS=Rattus norvegicus OX=10116 GN=Slc1a3 PE=1 SV=2	6.75979e+06	7.64784e+06	4.53941e+06	399660	714127	704689	6.28809e+06	9.01577e+06	6.4474e+06	9.1145e+06	571605	597364
tr|B1WBU7|B1WBU7_RAT	1	1	46.74	0.504853	0.999949	111.238	17393.2	Tmem50a protein OS=Rattus norvegicus OX=10116 GN=Tmem50a PE=2 SV=1	94.478	0	0	116.55	0	30.9791	0	15.1131	18.3814	88.4313	26798.6	0
Q99PD4|ARC1A_RAT	11	10	353.61	0.505036	0.999949	1.16082	41599.3	Actin-related protein 2/3 complex subunit 1A OS=Rattus norvegicus OX=10116 GN=Arpc1a PE=2 SV=1	80574.5	76150.8	286822	113307	117765	236409	166191	68663.9	84550.5	160924	20233.5	284250
B0BNE5|ESTD_RAT	8	7	365.9	0.505138	0.999949	1.13515	31363.7	S-formylglutathione hydrolase OS=Rattus norvegicus OX=10116 GN=Esd PE=2 SV=1	47343.1	21319.6	42027.3	124803	17741	96096.7	29123.7	9226.41	16308.3	32107.1	289898	19880.5
tr|G3V8G4|G3V8G4_RAT	7	7	230.84	0.505564	0.999949	1.66824	96001.4	Brevican core protein OS=Rattus norvegicus OX=10116 GN=Bcan PE=1 SV=1	38961.1	74198.9	42769.2	46655	13751.5	13798.4	65961.6	98667.7	39233.9	86109.7	88728.8	5218.31
tr|M0R4G0|M0R4G0_RAT	7	7	350.88	0.505706	0.999949	1.3497	79878.5	Immunoglobulin superfamily-containing leucine-rich repeat 2 OS=Rattus norvegicus OX=10116 GN=Islr2 PE=4 SV=2	13606.2	16000.2	25567.8	27331.3	54682.6	114608	22715.3	10849.4	91355.9	16794.2	10775.8	34065.9
P22831|SYNPR_RAT	5	5	184.97	0.506762	0.999949	1.12084	29107.1	Synaptoporin OS=Rattus norvegicus OX=10116 GN=Synpr PE=1 SV=2	416149	798555	481254	702906	124744	330119	469726	619733	1.26999e+06	786995	30509.5	21620.8
tr|D4A8L9|D4A8L9_RAT	7	7	316.23	0.507252	0.999949	1.35333	55406.4	BTB domain-containing 17 OS=Rattus norvegicus OX=10116 GN=Btbd17 PE=1 SV=1	349528	75043.8	55952.9	366465	536981	443369	92130	491602	225589	111456	21503.4	407976
tr|A0A0G2K1I8|A0A0G2K1I8_RAT;tr|Q5BJN3|Q5BJN3_RAT;tr|Q5PQR7|Q5PQR7_RAT	1	1	50.01	0.507351	0.999949	3.40146	19824.2	TIA1 cytotoxic granule-associated RNA-binding protein OS=Rattus norvegicus OX=10116 GN=Tia1 PE=4 SV=1	0	139.849	7451.28	13.6705	1796.53	409.28	2255.24	1.95519	97.1012	186.757	15834.6	14994.8
tr|D3ZP47|D3ZP47_RAT	5	5	239.11	0.507543	0.999949	1.25048	14010.6	14 kDa phosphohistidine phosphatase OS=Rattus norvegicus OX=10116 GN=Phpt1 PE=1 SV=1	206.835	255.521	262.903	920.135	27899.4	2902.37	346.44	358.083	7002.6	440.892	16262.1	16164.5
tr|A0A0U1RRQ6|A0A0U1RRQ6_RAT;tr|D3ZSN7|D3ZSN7_RAT	1	1	46.33	0.507658	0.999949	11.7382	35344.3	Solute carrier family 25, member 44 OS=Rattus norvegicus OX=10116 GN=Slc25a44 PE=1 SV=1	54.3299	120.215	0	38.7803	128.673	175.728	0	29.2427	78.6639	0	5969.29	0
tr|M0R5U4|M0R5U4_RAT	5	4	175.48	0.507892	0.999949	2.92496	151003	Adenylate cyclase 9 OS=Rattus norvegicus OX=10116 GN=Adcy9 PE=1 SV=2	2794.37	1399.07	6620.09	3449.31	2919.53	1564.24	1530.42	1388.99	17.9088	1003.41	48074.1	2818.21
P28572|SC6A9_RAT	3	3	109.53	0.508151	0.999949	1.03871	71061	Sodium- and chloride-dependent glycine transporter 1 OS=Rattus norvegicus OX=10116 GN=Slc6a9 PE=1 SV=2	33093	67658	17656.7	81343.7	41405.3	39938.1	25122.2	31063	24935.8	88162.7	97964	3371.73
P30835|PFKAL_RAT;tr|Q6P783|Q6P783_RAT	16	3	741.35	0.508162	0.999949	1.07903	85338.9	ATP-dependent 6-phosphofructokinase, liver type OS=Rattus norvegicus OX=10116 GN=Pfkl PE=1 SV=3	32918.7	43808.8	41955.2	21307.5	14728.2	19744.8	25436.7	28420.1	37572.7	56756.7	7883.96	5615.58
Q62703|RCN2_RAT	20	18	1145.34	0.509021	0.999949	1.04465	37433	Reticulocalbin-2 OS=Rattus norvegicus OX=10116 GN=Rcn2 PE=1 SV=2	463929	1.00182e+06	395593	25300.4	481988	1.4984e+06	425273	942027	382286	496548	666242	789389
P12001|RL18_RAT;tr|A0A0H2UHS7|A0A0H2UHS7_RAT;tr|Q0QEW8|Q0QEW8_RAT	8	7	353.12	0.509631	0.999949	1.30676	21658.6	60S ribosomal protein L18 OS=Rattus norvegicus OX=10116 GN=Rpl18 PE=1 SV=2	399336	545795	1.2232e+06	148622	20123.8	68409.5	599129	966808	50652.8	608290	821139	97374.2
Q5XIF3|NDUS4_RAT	4	4	152	0.510007	0.999949	1.66824	19740.6	NADH dehydrogenase [ubiquinone] iron-sulfur protein 4, mitochondrial OS=Rattus norvegicus OX=10116 GN=Ndufs4 PE=1 SV=1	192290	350771	113020	48177.3	14296.2	57658.8	198594	186123	463236	370198	63020.9	13738.9
P60905|DNJC5_RAT	4	4	299.04	0.510123	0.999949	1.93633	22100.7	DnaJ homolog subfamily C member 5 OS=Rattus norvegicus OX=10116 GN=Dnajc5 PE=1 SV=1	187723	229792	190291	2.34232e+06	295883	264598	99131.7	227150	312721	182821	785959	205233
P34064|PSA5_RAT;tr|Q6P9V6|Q6P9V6_RAT	6	6	252.07	0.510233	0.999949	1.17568	26390.9	Proteasome subunit alpha type-5 OS=Rattus norvegicus OX=10116 GN=Psma5 PE=1 SV=1	298440	162743	271558	50961.8	43302.9	485520	249344	295515	478412	181593	277653	60595.3
tr|B1WC34|B1WC34_RAT	19	18	1305.94	0.510348	0.999949	1.4985	59218.5	Glucosidase 2 subunit beta OS=Rattus norvegicus OX=10116 GN=Prkcsh PE=1 SV=1	1.50139e+06	1.35801e+06	573037	789816	5.2637e+06	2.63874e+06	800898	1.41885e+06	933406	880455	849830	3.20778e+06
O88506|STK39_RAT	3	2	138.55	0.510507	0.999949	1.41452	60050.8	STE20/SPS1-related proline-alanine-rich protein kinase OS=Rattus norvegicus OX=10116 GN=Stk39 PE=1 SV=2	6327.66	2727.4	4083.14	5287.97	8949.66	44484.1	1613.14	2051.86	683.549	2376.94	82957.1	11964.9
tr|A0A0G2K5N6|A0A0G2K5N6_RAT;tr|F1LQT3|F1LQT3_RAT	5	4	175.96	0.510802	0.999949	1.13722	160599	Rho-associated protein kinase OS=Rattus norvegicus OX=10116 GN=Rock2 PE=1 SV=1	229.967	896.666	16867.2	247.623	27682.8	1290.31	5653.34	494.795	2242.2	810.052	25427.2	19065.7
Q4G061|EIF3B_RAT	1	1	33.04	0.510803	0.999949	1.76715	90910.8	Eukaryotic translation initiation factor 3 subunit B OS=Rattus norvegicus OX=10116 GN=Eif3b PE=1 SV=1	16.5225	0	833.079	0	58.232	41.0666	0	0	0	0	43.8583	1632.99
O08678|MARK1_RAT;tr|A0A0G2K7H9|A0A0G2K7H9_RAT	5	4	206.76	0.51098	0.999949	3.89911	88234.6	Serine/threonine-protein kinase MARK1 OS=Rattus norvegicus OX=10116 GN=Mark1 PE=1 SV=1	840.759	5822.95	58143.8	2876.13	700.895	23.6994	21342	69.4085	358.333	1597.17	146448	96915.6
tr|M0R3N4|M0R3N4_RAT	7	7	301.87	0.511106	0.999949	1.01404	41602.8	Vesicle amine transport 1-like OS=Rattus norvegicus OX=10116 GN=Vat1l PE=1 SV=2	239411	663500	500519	31777	34375.2	26624.9	83307.1	141412	284194	690916	70622	246759
tr|B2RZ79|B2RZ79_RAT	2	1	52.76	0.511924	0.999949	2.68854	17966.9	Iron-sulfur cluster assembly enzyme OS=Rattus norvegicus OX=10116 GN=Iscu PE=1 SV=1	15332.2	3539.1	1145.84	14176.3	2932.44	7188.02	1997.72	4770.97	6949.08	12053.6	89266.3	4101.95
P35745|ACYP2_RAT;tr|D4A1G1|D4A1G1_RAT	1	1	49.62	0.511987	0.999949	1.51103	10863.3	Acylphosphatase-2 OS=Rattus norvegicus OX=10116 GN=Acyp2 PE=1 SV=2	51401.7	23003.8	50745.1	366.469	232434	3508.99	45466.8	3526.56	64.8831	16771.6	1419.74	171964
tr|G3V9Y1|G3V9Y1_RAT	13	7	473.43	0.512297	0.999949	1.2901	228996	Myosin, heavy polypeptide 10, non-muscle, isoform CRA_b OS=Rattus norvegicus OX=10116 GN=Myh10 PE=1 SV=1	931701	357885	490085	352600	88952.5	499131	427806	637651	579418	269022	57903.7	136843
Q4KM98|MFF_RAT;tr|A0A0G2K2M2|A0A0G2K2M2_RAT;tr|A0A0G2KAL9|A0A0G2KAL9_RAT;tr|A0A0H2UHM6|A0A0H2UHM6_RAT	2	2	50.49	0.512457	0.999949	1.04587	24970.6	Mitochondrial fission factor OS=Rattus norvegicus OX=10116 GN=Mff PE=1 SV=1	1.23143e+06	619760	116902	109841	677523	1.50218e+06	1.43372e+06	277234	743188	851133	521191	626490
P63055|PCP4_RAT;tr|Q8CHN7|Q8CHN7_RAT	2	2	109.94	0.512473	0.999949	1.08268	6807.41	Calmodulin regulator protein PCP4 OS=Rattus norvegicus OX=10116 GN=Pcp4 PE=1 SV=2	675696	338450	611907	16355.2	37750.5	2.50655e+06	471144	708319	1.658e+06	433074	531875	64577.7
tr|D3ZUB0|D3ZUB0_RAT	10	9	548.16	0.512515	0.999949	1.32508	38090	Reticulocalbin 1 OS=Rattus norvegicus OX=10116 GN=Rcn1 PE=1 SV=1	187028	394855	211537	411149	122905	751398	269799	260083	539041	182788	235515	81634.5
tr|D3ZEK5|D3ZEK5_RAT	1	1	30.31	0.512538	0.999949	27.3807	74513.5	Heparan-sulfate 6-O-sulfotransferase OS=Rattus norvegicus OX=10116 GN=Hs6st2 PE=3 SV=2	5.26228	49.0828	48.4729	0	144.036	0	0	0	9.34559	49.6484	4832.81	1867.22
O88339|EPN1_RAT;tr|A0A140TAC3|A0A140TAC3_RAT	1	1	20.2	0.513374	0.999949	1.9854	60158.1	Epsin-1 OS=Rattus norvegicus OX=10116 GN=Epn1 PE=1 SV=1	11369.1	1828.59	35352.4	17875.1	2153.87	90689.9	4547.56	47333.9	18267.4	4802.85	1172.91	4095.53
Q811U3|RB6I2_RAT;tr|A0A0G2JYT1|A0A0G2JYT1_RAT;tr|F1LPE9|F1LPE9_RAT	1	1	34.89	0.51354	0.999949	9.60214	108818	ELKS/Rab6-interacting/CAST family member 1 OS=Rattus norvegicus OX=10116 GN=Erc1 PE=1 SV=1	1172.64	201.398	774.044	1526.83	142.389	743.722	84.5601	13003.5	3612.89	21.8771	25215.3	1857.51
tr|B0BN46|B0BN46_RAT	1	1	32.35	0.513826	0.999949	37.1588	35937.6	Glyoxylate and hydroxypyruvate reductase OS=Rattus norvegicus OX=10116 GN=Grhpr PE=1 SV=1	2074.53	50.7083	252.795	141.932	90.2197	24.0064	99.6759	33.1933	36.6784	172.484	96415.9	1125.39
tr|D3ZW19|D3ZW19_RAT	1	1	41.07	0.514375	0.999949	119.042	64778	Leucine-rich repeat and Ig domain-containing 3 OS=Rattus norvegicus OX=10116 GN=Lingo3 PE=4 SV=1	0	0	0	0	16.3913	28.411	0	146.021	0	0	5187.34	0
tr|D4ADE5|D4ADE5_RAT	1	1	36.22	0.514376	0.999949	3.16244	40507.5	Histone-lysine N-methyltransferase SETD7 OS=Rattus norvegicus OX=10116 GN=Setd7 PE=1 SV=1	1653.79	871.972	267.726	775.52	1559.09	42613.4	2392.53	368.337	277.223	15164.3	127759	5018.67
tr|B2RYN6|B2RYN6_RAT	6	6	191.22	0.514427	0.999949	1.03347	91350.4	AP-1 complex subunit gamma OS=Rattus norvegicus OX=10116 GN=Ap1g1 PE=1 SV=1	14496.8	46954.3	12390.6	5116.97	68580.6	160986	55267.2	27138.2	13635	56885	128826	37100
tr|B2LYI9|B2LYI9_RAT	4	3	128.08	0.514475	0.999949	1.12503	221769	Tenascin C OS=Rattus norvegicus OX=10116 GN=Tnc PE=2 SV=1	23.5879	17584.2	29189.6	214.323	47294.2	650.701	40088.2	2059.48	124.569	8558.69	10832.6	45165.9
Q6RUV5|RAC1_RAT	20	5	1130.7	0.515271	0.999949	1.00055	21450.1	Ras-related C3 botulinum toxin substrate 1 OS=Rattus norvegicus OX=10116 GN=Rac1 PE=1 SV=1	7.69061e+06	5.60722e+06	3.31209e+06	7.94536e+06	446182	1.61543e+07	9.01511e+06	5.59528e+06	1.9085e+07	7.15079e+06	84065.1	202906
tr|D4AC69|D4AC69_RAT	2	2	50.89	0.515855	0.999949	1.2766	79016.2	Leishmanolysin-like peptidase OS=Rattus norvegicus OX=10116 GN=Lmln PE=3 SV=2	585.148	2097.41	6125.09	315.586	608.732	25.3735	4870.72	649.34	118.008	4483.76	1733.55	600.823
Q76M68|IQEC3_RAT;tr|F1LPA3|F1LPA3_RAT	2	1	62.27	0.516706	0.999949	1.54747	129018	IQ motif and SEC7 domain-containing protein 3 OS=Rattus norvegicus OX=10116 GN=Iqsec3 PE=1 SV=1	75.2218	3820.67	5875.49	10280.4	584.001	127.933	10246.9	1893.63	96.6339	4816.51	14099	978.632
P18395|CSDE1_RAT	3	3	109.97	0.517018	0.999949	7.53613	88894.7	Cold shock domain-containing protein E1 OS=Rattus norvegicus OX=10116 GN=Csde1 PE=2 SV=1	204.786	490.89	1197.51	30.8806	1176.79	1197.18	778.182	363.717	138.83	457.79	30176.6	475.48
tr|M0R6W5|M0R6W5_RAT	1	1	20.89	0.517676	0.999949	10.9923	49660.8	Uncharacterized protein OS=Rattus norvegicus OX=10116 PE=1 SV=2	67.1699	34.8742	208.453	49.0511	74.0727	117.385	72.9435	30.0761	144.878	152.433	5633.15	23.318
tr|B2RYC4|B2RYC4_RAT;tr|F7FG68|F7FG68_RAT	4	3	146.23	0.517718	0.999949	2.52799	66873	RING-type E3 ubiquitin transferase OS=Rattus norvegicus OX=10116 GN=Syvn1 PE=2 SV=1	39350.2	52752.4	53959.9	31894.8	10174.5	48445.7	14383.5	94935.6	259339	58322.2	164384	6702.66
tr|G3V940|G3V940_RAT	5	4	185.81	0.518073	0.999949	1.39681	53938.3	Coronin OS=Rattus norvegicus OX=10116 GN=Coro1b PE=1 SV=1	37508.9	22566.8	20250.7	49626.9	133613	175044	17590.2	60294.6	15528.8	20322	49229.6	151044
P17074|RS19_RAT;tr|A0A0H2UI38|A0A0H2UI38_RAT;tr|D4A6G6|D4A6G6_RAT;tr|F1M764|F1M764_RAT	5	5	201.3	0.518683	0.999949	1.51457	16085.5	40S ribosomal protein S19 OS=Rattus norvegicus OX=10116 GN=Rps19 PE=2 SV=3	481587	286472	190881	118301	37821.8	13813.6	193607	877520	182220	348133	71690.4	36596.5
Q5XIR9|UBAC1_RAT	1	1	47.76	0.519363	0.999949	1.1324	45546.5	Ubiquitin-associated domain-containing protein 1 OS=Rattus norvegicus OX=10116 GN=Ubac1 PE=1 SV=1	47.2491	1121.4	9116.02	131.452	32108.5	50.8886	4095.09	253.881	111.472	1324.12	8098.86	23714.3
tr|Q56R18|Q56R18_RAT	1	1	40.26	0.520332	0.999949	1.39388	57772.9	Importin subunit alpha OS=Rattus norvegicus OX=10116 GN=Kpna3 PE=1 SV=1	1.09476	845.02	2002.98	0	10907.1	21.5915	1764.43	62.2283	16.1235	279.219	142.63	7619.81
F1M386|RPGF2_RAT;tr|A0A0A0MP77|A0A0A0MP77_RAT;tr|A0A0G2JU11|A0A0G2JU11_RAT	2	2	82.33	0.520555	0.999949	25.4537	166387	Rap guanine nucleotide exchange factor 2 OS=Rattus norvegicus OX=10116 GN=Rapgef2 PE=1 SV=2	801.112	34.7108	209.365	693.195	55.0897	1374.71	241.993	274.727	134.575	349.221	79505.8	135.532
Q68FW9|CSN3_RAT	4	4	145.03	0.520733	0.999949	1.08201	47859.1	COP9 signalosome complex subunit 3 OS=Rattus norvegicus OX=10116 GN=Cops3 PE=1 SV=1	100623	36590.5	35510.8	100970	32394.3	91055.7	30748.4	91454.6	156257	40562.6	8513.31	39505.5
tr|B0BNL8|B0BNL8_RAT;tr|G3V648|G3V648_RAT	16	15	793.39	0.520809	0.999949	1.02105	41000.9	Agpat3 protein (Fragment) OS=Rattus norvegicus OX=10116 GN=Agpat3 PE=2 SV=1	3.02653e+06	3.37968e+06	2.04281e+06	1.54994e+06	1.68818e+06	1.94099e+06	961766	4.26223e+06	3.26149e+06	3.34154e+06	596003	924134
tr|A0A0G2K7L2|A0A0G2K7L2_RAT	3	2	137.3	0.520815	0.999949	6.35103	134127	Immunoglobulin superfamily, member 3 OS=Rattus norvegicus OX=10116 GN=Igsf3 PE=4 SV=1	23.9225	583.972	1287.44	32.4525	1485.79	104.888	1988.25	117.339	9.2177	115.061	6341.19	13774.8
tr|A0A0G2K7Y2|A0A0G2K7Y2_RAT	12	10	548.08	0.521252	0.999949	1.41396	97022	Oxidation resistance protein 1 OS=Rattus norvegicus OX=10116 GN=Oxr1 PE=1 SV=1	94196.9	25528.4	80908.7	43989.1	256948	143096	48278.9	91243.8	57629.1	17786.3	63417.8	177573
tr|F1M957|F1M957_RAT	1	1	49.11	0.521443	0.999949	3.17936	308977	von Willebrand factor OS=Rattus norvegicus OX=10116 GN=Vwf PE=1 SV=3	0	637.568	0	0	11275.9	0	715.287	0	0	64.5642	183.285	2784
C9WPN6|IF2H_RAT;P81795|IF2G_RAT	4	4	138.41	0.522114	0.999949	1.27347	51153.7	Eukaryotic translation initiation factor 2 subunit 3, Y-linked OS=Rattus norvegicus OX=10116 GN=Eif2s3y PE=2 SV=2	2552.76	9573.01	50020	7248.53	37295.4	5997.04	32410.4	3809.31	46677.6	8074.65	39971	12560.7
tr|A0A0G2JVU1|A0A0G2JVU1_RAT	4	4	227.64	0.523367	0.999949	1.14344	84414.7	Integrin beta OS=Rattus norvegicus OX=10116 GN=Itgb8 PE=1 SV=1	35196.9	70052.7	27715.8	11093	61579.5	100089	12052.9	4164.21	35420	75793.6	109172	30771.4
P61983|1433G_RAT	21	10	1265.76	0.523475	0.999949	1.11475	28302.6	14-3-3 protein gamma OS=Rattus norvegicus OX=10116 GN=Ywhag PE=1 SV=2	2.93295e+06	1.00324e+06	1.45812e+06	378493	2.07219e+06	1.04078e+06	1.1827e+06	1.38312e+06	33987.9	961281	1.24717e+06	3.1628e+06
Q63186|EI2BD_RAT;tr|A0A096MIS3|A0A096MIS3_RAT	1	1	26.81	0.5236	0.999949	23.8877	57809.3	Translation initiation factor eIF-2B subunit delta OS=Rattus norvegicus OX=10116 GN=Eif2b4 PE=2 SV=1	80.8719	20.4246	202.225	137.872	0	1080.32	209.088	175.57	56.3535	16.5336	35880.9	11.6574
tr|Q9JMA8|Q9JMA8_RAT	1	1	23.1	0.523962	0.999949	20.902	104444	Exostoses (Multiple)-like 3, isoform CRA_a OS=Rattus norvegicus OX=10116 GN=Extl3 PE=2 SV=1	211.964	266.185	235.173	108.695	18.6845	92.571	109.409	164.114	71.3892	250.493	18887.9	23.9046
tr|D4A2I9|D4A2I9_RAT	1	1	42.38	0.524349	0.999949	1.35968	114449	Sortilin-related VPS10 domain-containing receptor 3 OS=Rattus norvegicus OX=10116 GN=Sorcs3 PE=3 SV=3	75.6663	2787.13	2956.47	136.015	13522	28.6271	4027.74	106.818	412.198	443.768	3498.24	18033
tr|G3V6H5|G3V6H5_RAT	19	15	1080.57	0.524847	0.999949	1.10672	34136.9	Mitochondrial 2-oxoglutarate/malate carrier protein OS=Rattus norvegicus OX=10116 GN=Slc25a11 PE=1 SV=1	2.86974e+06	5.43807e+06	2.90935e+06	1.11382e+06	2.37889e+06	5.78807e+06	4.83241e+06	4.57859e+06	5.66728e+06	7.0846e+06	77839.6	444818
tr|Q3B8P4|Q3B8P4_RAT;tr|Q5EBD4|Q5EBD4_RAT	1	1	41.65	0.52485	0.999949	1.37899	38593.9	m7GpppX diphosphatase OS=Rattus norvegicus OX=10116 GN=Dcps PE=1 SV=1	31.6738	617.838	1268.58	5.61233	13560.9	1548.07	1446.96	161.68	340.193	380.359	1013.73	20145
P61794|LPAR1_RAT	1	1	32.97	0.52501	0.999949	1.959	41119.3	Lysophosphatidic acid receptor 1 OS=Rattus norvegicus OX=10116 GN=Lpar1 PE=1 SV=1	4362.54	2806.08	1716.26	10935.7	14092.8	3139.6	8913.88	0	472.425	7175.25	37840.3	18185
P63245|RACK1_RAT;tr|A0A0G2JZE6|A0A0G2JZE6_RAT	2	2	84.55	0.526286	0.999949	1.55207	35076.7	Receptor of activated protein C kinase 1 OS=Rattus norvegicus OX=10116 GN=Rack1 PE=1 SV=3	89440.8	28211.3	6442.79	15372.4	41857.8	17368.3	30957.8	13800.7	33191	27480	3079.2	19509.5
P63102|1433Z_RAT	36	19	1933.64	0.526472	0.999949	1.20558	27771.1	14-3-3 protein zeta/delta OS=Rattus norvegicus OX=10116 GN=Ywhaz PE=1 SV=1	1.89274e+07	1.31864e+07	1.85495e+07	3.5784e+06	1.23667e+07	1.24177e+07	1.5e+07	1.81851e+07	3.07954e+07	1.27824e+07	7.49394e+06	1.10153e+07
P70490|MFGM_RAT;tr|A0A0G2K506|A0A0G2K506_RAT;tr|Q1PBJ1|Q1PBJ1_RAT	5	2	180.05	0.526578	0.999949	1.28853	47412.9	Lactadherin OS=Rattus norvegicus OX=10116 GN=Mfge8 PE=2 SV=1	1906.75	16085.6	31009.8	2475.23	46106.9	347.363	30940.1	8046.55	1306.59	12353.5	5985.64	67555
D3ZWJ9|F234B_RAT	11	9	541.38	0.528024	0.999949	2.93467	67040.4	Protein FAM234B OS=Rattus norvegicus OX=10116 GN=Fam234b PE=1 SV=1	3956.76	17084.7	31679	30224.2	86890.3	6940.27	25686.9	36941.3	2909.34	11963.8	362693	78583.4
Q6P767|PTTG_RAT	2	2	57.2	0.528177	0.999949	8.25234	19900.3	Pituitary tumor-transforming gene 1 protein-interacting protein OS=Rattus norvegicus OX=10116 GN=Pttg1ip PE=2 SV=1	947.617	3181.28	22302	451.569	2141.18	2545.36	9197.74	2351.26	99.0225	3457.38	236478	8935.24
tr|A0A0G2JVW5|A0A0G2JVW5_RAT	11	6	421.94	0.528322	0.999949	1.07365	447662	HECT-type E3 ubiquitin transferase OS=Rattus norvegicus OX=10116 GN=Huwe1 PE=1 SV=1	75782.5	36512.6	35837.8	9018.8	46444.6	66617.7	42277.8	23317.5	100458	67617.7	2048.3	15958.3
Q6AXS4|RENR_RAT	14	13	619.56	0.528396	0.999949	1.48047	39081.8	Renin receptor OS=Rattus norvegicus OX=10116 GN=Atp6ap2 PE=1 SV=1	1.75645e+06	3.06775e+06	932522	611481	5.50964e+06	2.08119e+06	1.97355e+06	1.58219e+06	1.64674e+06	2.1827e+06	344214	1.69939e+06
P19944|RLA1_RAT	3	2	174.67	0.528689	0.999949	3.37728	11497.9	60S acidic ribosomal protein P1 OS=Rattus norvegicus OX=10116 GN=Rplp1 PE=3 SV=1	121.628	385.013	804.454	15.2155	5532.2	15.5419	1070.71	109.99	16.1071	79.7472	16023	5916.07
Q5XI64|ABHD6_RAT	9	8	525.66	0.528869	0.999949	2.18036	38311.6	Monoacylglycerol lipase ABHD6 OS=Rattus norvegicus OX=10116 GN=Abhd6 PE=1 SV=1	167237	156637	117284	2.35188e+06	1.16311e+06	1.92282e+06	184957	181561	322058	144440	632369	1.23095e+06
Q4G063|CREL2_RAT	2	2	98.5	0.528934	0.999949	1.16937	38250.7	Protein disulfide isomerase Creld2 OS=Rattus norvegicus OX=10116 GN=Creld2 PE=1 SV=1	7939.3	646.213	3064.6	53635.7	89920.7	38007.9	89.9879	2999.98	64127.9	292.231	57905.7	39814.3
Q6AYS7|ACY1A_RAT	2	2	79.03	0.529078	0.999949	1.89468	45804.1	Aminoacylase-1A OS=Rattus norvegicus OX=10116 GN=Acy1a PE=1 SV=1	1720.82	3059.44	3582.19	327.239	22138.4	6.54575	4983.52	2652.32	707.996	3345	809.724	3775.77
A0A0G2JXN2|TRI46_RAT;tr|A0A5H1ZRU8|A0A5H1ZRU8_RAT;tr|A0A5H1ZRV2|A0A5H1ZRV2_RAT	2	2	60.73	0.52925	0.999949	1.15176	83430.6	Tripartite motif-containing protein 46 OS=Rattus norvegicus OX=10116 GN=Trim46 PE=1 SV=2	383.702	422.036	2182.64	1661.41	6801.62	111.111	2190.02	54.1411	45.0402	82.7499	3404.61	4262.45
tr|A0A0G2K865|A0A0G2K865_RAT;tr|D0UFD0|D0UFD0_RAT;tr|F1MAB9|F1MAB9_RAT	1	1	37.82	0.529405	0.999949	1.96566	26882.9	Tumor protein D52 OS=Rattus norvegicus OX=10116 GN=Tpd52 PE=1 SV=1	4545.88	5735.15	2149.79	10478.9	52962.1	2452.43	3156.13	1347.37	52157.8	5257.56	69519.1	22520.8
Q63632|S12A4_RAT	6	1	227.86	0.529506	0.999949	1.00117	120628	Solute carrier family 12 member 4 OS=Rattus norvegicus OX=10116 GN=Slc12a4 PE=1 SV=1	901.48	29.7318	45.561	1135.77	182.043	32.114	16.964	17.5476	351.406	21.1128	1890.61	31.7885
P07896|ECHP_RAT	1	1	27.4	0.529617	0.999949	2.67321	78658.1	Peroxisomal bifunctional enzyme OS=Rattus norvegicus OX=10116 GN=Ehhadh PE=1 SV=2	0	1643.29	5922.71	0	1469.92	102.119	14114.6	981.674	31.4893	2134.01	0	7166.15
P04775|SCN2A_RAT;tr|A0A0G2K207|A0A0G2K207_RAT;tr|F1M9G9|F1M9G9_RAT	12	10	522.31	0.529892	0.999949	1.42163	227872	Sodium channel protein type 2 subunit alpha OS=Rattus norvegicus OX=10116 GN=Scn2a PE=1 SV=1	462759	296911	335202	55299.9	293680	105912	324596	335340	850090	452524	73592.7	167050
P15205|MAP1B_RAT	50	41	2515.3	0.530197	0.999949	1.11988	269640	Microtubule-associated protein 1B OS=Rattus norvegicus OX=10116 GN=Map1b PE=1 SV=3	1.16941e+06	837377	1.15647e+06	306417	592843	327822	606090	1.24211e+06	575416	1.04508e+06	40327.6	411328
tr|D3ZYR0|D3ZYR0_RAT;tr|Q5BMA6|Q5BMA6_RAT	1	1	25.88	0.530394	0.999949	1.11599	158288	Rho guanine nucleotide exchange factor 12 OS=Rattus norvegicus OX=10116 GN=Arhgef12 PE=1 SV=3	6.99007	530.007	693.326	16.4795	6940.84	0	517.878	0	805.914	178.688	1356.38	6278.51
Q63772|GAS6_RAT;tr|Q6IRL1|Q6IRL1_RAT	3	3	123.53	0.530918	0.999949	5.13735	74637.8	Growth arrest-specific protein 6 OS=Rattus norvegicus OX=10116 GN=Gas6 PE=1 SV=1	803.599	349.264	918.573	669.713	1281.65	199.083	335.636	218.665	235.15	630.237	14229.9	6039.71
P54900|SCN2B_RAT;tr|Q62861|Q62861_RAT	7	5	409.62	0.531858	0.999949	1.07197	24144.6	Sodium channel subunit beta-2 OS=Rattus norvegicus OX=10116 GN=Scn2b PE=1 SV=1	1.58116e+06	1.75725e+06	1.09741e+06	26336.2	622943	1.60678e+06	1.5914e+06	1.36933e+06	1.51943e+06	1.75949e+06	446191	487681
tr|D3ZT47|D3ZT47_RAT	3	3	148.19	0.53192	0.999949	3.39663	87420	Family with sequence similarity 171, member A2 OS=Rattus norvegicus OX=10116 GN=Fam171a2 PE=1 SV=2	31.6545	1438.62	13306.9	340.545	12269.8	2816.38	4642.04	672.705	220.933	1407.85	82525.8	13122.3
P14942|GSTA4_RAT;tr|A9UMW1|A9UMW1_RAT	3	2	86.91	0.532081	0.999949	1.15298	25509.8	Glutathione S-transferase alpha-4 OS=Rattus norvegicus OX=10116 GN=Gsta4 PE=1 SV=2	94354.9	28218.8	146442	198848	92601.4	46504.8	197848	94167.1	123017	30755.5	6882.86	73766.1
Q62636|RAP1B_RAT	11	3	515.83	0.532125	0.999949	1.09681	20797.8	Ras-related protein Rap-1b OS=Rattus norvegicus OX=10116 GN=Rap1b PE=1 SV=2	2.66409e+06	1.86382e+06	2.33473e+06	167410	78166.5	2.67402e+06	2.16648e+06	2.63799e+06	2.87349e+06	2.13588e+06	392649	522781
P62836|RAP1A_RAT	10	2	480.31	0.532125	0.999949	1.09681	20987.2	Ras-related protein Rap-1A OS=Rattus norvegicus OX=10116 GN=Rap1a PE=1 SV=1	991978	693996	869341	62335.3	29105.4	995676	806693	982259	1.06995e+06	795300	146203	194658
P10499|KCNA1_RAT	4	2	169.33	0.532136	0.999949	1.02492	56379.5	Potassium voltage-gated channel subfamily A member 1 OS=Rattus norvegicus OX=10116 GN=Kcna1 PE=1 SV=1	59764.5	64374.7	80803.8	106800	159749	21381.5	121996	101988	156448	74787.6	1870.31	23797.6
P07151|B2MG_RAT	1	1	44.04	0.532297	0.999949	12.0783	13719.9	Beta-2-microglobulin OS=Rattus norvegicus OX=10116 GN=B2m PE=1 SV=1	602.796	1042.95	1228.6	28.8235	1892.88	2145.79	28300.2	942.44	4.43191	1106.48	48416.1	5076.3
Q63798|PSME2_RAT	2	2	92.23	0.532306	0.999949	25.0941	26857	Proteasome activator complex subunit 2 OS=Rattus norvegicus OX=10116 GN=Psme2 PE=2 SV=3	524.287	114.131	176.816	120.419	774.2	237.89	755.157	411.811	27.1172	79.1011	47083.8	519.853
tr|B1WBV6|B1WBV6_RAT	12	12	512.72	0.532316	0.999949	1.56026	71722.8	Aplp1 protein OS=Rattus norvegicus OX=10116 GN=Aplp1 PE=2 SV=1	81726.8	89333.2	69695.1	62883.7	767729	325236	83308.9	130697	240266	90700.6	6063.08	344074
Q6IG02|K22E_RAT;tr|A0A0G2JWX4|A0A0G2JWX4_RAT	7	5	279.89	0.532792	0.999949	2.48604	69127.1	Keratin, type II cytoskeletal 2 epidermal OS=Rattus norvegicus OX=10116 GN=Krt2 PE=3 SV=1	44981	72250.4	43581.4	217138	84820.5	424097	40625.4	134391	1.96654e+06	36423	2943.33	23865.6
Q5XIJ5|AB17A_RAT;Q6AY17|AB17B_RAT	1	1	27.56	0.533247	0.999949	1.34238	33993.8	Alpha/beta hydrolase domain-containing protein 17A OS=Rattus norvegicus OX=10116 GN=Abhd17a PE=1 SV=1	9551.07	21069.6	27506.7	42686	76141.5	1366.58	58935.6	8594.04	8641.8	21659.4	109.16	34900
Q9WU70|STXB5_RAT	4	3	149.96	0.533303	0.999949	1.28095	127659	Syntaxin-binding protein 5 OS=Rattus norvegicus OX=10116 GN=Stxbp5 PE=1 SV=1	384131	317337	258621	22117.3	15229.2	241323	314154	275067	573695	319086	59992.2	44788.5
P11507|AT2A2_RAT	77	73	4042.28	0.533724	0.999949	1.25281	114768	Sarcoplasmic/endoplasmic reticulum calcium ATPase 2 OS=Rattus norvegicus OX=10116 GN=Atp2a2 PE=1 SV=1	980484	1.08753e+06	1.23466e+06	3.3665e+06	7.88078e+06	1.42939e+07	1.42054e+06	1.22495e+06	1.6988e+07	1.16873e+06	1.28258e+06	938554
P70584|ACDSB_RAT;tr|A0A0A0MY00|A0A0A0MY00_RAT	2	1	77.34	0.533806	0.999949	1.15838	47824	Short/branched chain specific acyl-CoA dehydrogenase, mitochondrial OS=Rattus norvegicus OX=10116 GN=Acadsb PE=1 SV=1	442.326	342.645	634.356	881.141	11975.9	45.373	1326.92	66.9048	89.6113	0.609348	13938.2	1167.83
tr|F1LXJ9|F1LXJ9_RAT	3	1	128.68	0.534346	0.999949	1.93028	142502	Protein-tyrosine-phosphatase OS=Rattus norvegicus OX=10116 GN=Ptprt PE=1 SV=2	73.6581	1087.92	2456	12.0652	19137.6	29.2178	1878.12	50.9825	67.705	552.361	37368.2	4086.19
Q66HG5|TM9S2_RAT	4	2	205.22	0.534427	0.999949	6.02744	75586.4	Transmembrane 9 superfamily member 2 OS=Rattus norvegicus OX=10116 GN=Tm9sf2 PE=2 SV=1	5633.36	11794.6	21939.3	11273.8	47225.4	2999.12	50926.4	996.244	435868	106724	7431.17	6016.51
Q9ESR9|ABCA2_RAT;tr|G3V7X4|G3V7X4_RAT	14	12	561.08	0.535247	0.999949	1.38672	270926	ATP-binding cassette sub-family A member 2 OS=Rattus norvegicus OX=10116 GN=Abca2 PE=1 SV=1	423948	582964	414694	438791	742953	271634	596754	645973	1.48925e+06	703450	334082	217283
A0JPQ9|CHID1_RAT;tr|A0A0G2JSR1|A0A0G2JSR1_RAT;tr|Q7TP14|Q7TP14_RAT	7	7	349.98	0.535534	0.999949	1.13791	44874.6	Chitinase domain-containing protein 1 OS=Rattus norvegicus OX=10116 GN=Chid1 PE=2 SV=2	184518	378830	353956	134262	342643	104593	35567	639340	505923	425164	41497.1	58003.3
P20717|PADI2_RAT;tr|F1LPA6|F1LPA6_RAT	5	5	219.12	0.535611	0.999949	1.8325	75356.5	Protein-arginine deiminase type-2 OS=Rattus norvegicus OX=10116 GN=Padi2 PE=1 SV=1	15682.7	8088.23	4704.07	67444.9	8319.19	41592.8	8171.83	10649.7	11428.6	6213.21	32051.1	11066.3
Q07647|GTR3_RAT;tr|A0A0G2JSJ3|A0A0G2JSJ3_RAT;tr|A0A0G2JVB0|A0A0G2JVB0_RAT	10	8	529.27	0.535829	0.999949	1.2165	53580.9	Solute carrier family 2, facilitated glucose transporter member 3 OS=Rattus norvegicus OX=10116 GN=Slc2a3 PE=1 SV=1	124604	428608	242350	220995	156369	64963.2	233288	388010	212637	421405	85244.2	165313
tr|B2RYS2|B2RYS2_RAT	6	5	352.22	0.53595	0.999949	1.03148	13558.5	Cytochrome b-c1 complex subunit 7 OS=Rattus norvegicus OX=10116 GN=Uqcrb PE=1 SV=1	956345	2.00425e+06	1.18772e+06	964382	521443	860919	909870	1.38557e+06	1.32589e+06	2.15556e+06	96080	423854
tr|F1LW26|F1LW26_RAT	1	1	28.06	0.536037	0.999949	1.42359	12925.5	Ig-like domain-containing protein OS=Rattus norvegicus OX=10116 PE=4 SV=3	0	2278.02	8557.98	2.04797	8454.73	0	4515.25	11.4204	15.4331	2374.82	24.3179	20523.8
P10824|GNAI1_RAT	27	11	1409.86	0.536154	0.999949	1.48875	40345.1	Guanine nucleotide-binding protein G(i) subunit alpha-1 OS=Rattus norvegicus OX=10116 GN=Gnai1 PE=1 SV=3	2.37627e+06	1.07835e+06	1.30608e+06	275351	2.21932e+06	362372	1.00157e+06	1.34961e+06	925777	833413	98743	907769
Q5U301|AKAP2_RAT;tr|F1LPQ9|F1LPQ9_RAT	1	1	37.86	0.536817	0.999949	1.05109	95940.8	A-kinase anchor protein 2 OS=Rattus norvegicus OX=10116 GN=Akap2 PE=1 SV=1	0	2208.55	12379	42.8748	26446.4	0	5124.64	22.7687	101.14	3145.41	47.5804	34733.9
tr|B1WC84|B1WC84_RAT	1	1	42.59	0.536865	0.999949	1.31613	28384.1	Canopy 4 homolog (Zebrafish) OS=Rattus norvegicus OX=10116 GN=Cnpy4 PE=1 SV=1	893.455	33.0763	1.52332	187.854	500.873	8696.55	24.1896	15.4452	0	39.4082	7000.66	756.376
Q5U2X6|CCD47_RAT	10	8	479.15	0.537398	0.999949	1.27157	55732.7	PAT complex subunit CCDC47 OS=Rattus norvegicus OX=10116 GN=Ccdc47 PE=2 SV=1	68940	110789	233120	781935	38479.1	185231	213973	256063	492092	128861	8469.32	16087.8
P62914|RL11_RAT;tr|Q4V8I6|Q4V8I6_RAT	4	4	162.88	0.53765	0.999949	1.10417	20252.4	60S ribosomal protein L11 OS=Rattus norvegicus OX=10116 GN=Rpl11 PE=1 SV=2	926450	1.45732e+06	901728	970249	219111	630803	1.15312e+06	1.47094e+06	1.53976e+06	1.36526e+06	35004.9	73412.3
tr|D4A6H8|D4A6H8_RAT	5	3	210.89	0.537656	0.999949	3.19521	52789.2	Alpha N-catenin OS=Rattus norvegicus OX=10116 GN=Ctnna2 PE=1 SV=3	5979.12	9255.39	5267.76	281358	9248.43	34425.4	4771.34	26378.1	9533.96	11936.3	53968.9	1552.8
P70483|STRN_RAT;tr|G3V6L8|G3V6L8_RAT	4	1	133.18	0.53813	0.999949	1.01863	86226.1	Striatin OS=Rattus norvegicus OX=10116 GN=Strn PE=1 SV=1	17449.6	8016.8	8791.28	1766.66	2222.94	9502.93	1723.83	31011.5	1417.46	2477.91	5899.17	4347.02
D4AAZ6|RL37A_RAT;P61515|RL37P_RAT;tr|A0A0H2UHU1|A0A0H2UHU1_RAT;tr|D4A7B1|D4A7B1_RAT;tr|D4A829|D4A829_RAT	1	1	48.18	0.538279	0.999949	2.24644	8062.71	60S ribosomal protein L37a OS=Rattus norvegicus OX=10116 GN=Rpl37a PE=1 SV=1	41480.8	1432.29	1093.18	77241.4	21016.6	6906.43	44569	12202.7	175997	96756.3	1049.38	4528.3
P20171|RASH_RAT	8	2	403.78	0.53848	0.999949	1.47786	21298.1	GTPase HRas OS=Rattus norvegicus OX=10116 GN=Hras PE=1 SV=2	98526.4	144266	61783.3	114032	705991	348562	88540.1	155170	451809	128645	30840.6	141818
tr|Q6IMX8|Q6IMX8_RAT	1	1	34.92	0.538575	0.999949	1.62139	49629.2	Acyl-CoA thioesterase 2 OS=Rattus norvegicus OX=10116 GN=Acot2 PE=1 SV=1	4992.73	138339	1417.05	0	3118.47	0	0	0	0	89468.6	655.717	1073.57
Q5XIA8|GHITM_RAT	3	2	118.54	0.538751	0.999949	1.10825	37178.1	Growth hormone-inducible transmembrane protein OS=Rattus norvegicus OX=10116 GN=Ghitm PE=2 SV=1	231.191	32774.7	47289	327.901	72003.2	1714.63	64010.5	1925.59	616.268	34141.1	15722.4	54631.9
tr|F7EYB9|F7EYB9_RAT;tr|Q7TNM3|Q7TNM3_RAT;tr|Q7TQ25|Q7TQ25_RAT	3	3	153.54	0.539098	0.999949	1.3522	49581	Oligodendrocyte-myelin glycoprotein OS=Rattus norvegicus OX=10116 GN=Omg PE=1 SV=1	56333.6	6867.52	55646.5	36062.7	104340	58077.6	22654	22457.2	95993	11076.2	61763.1	20732.2
Q5U216|DX39A_RAT;Q63413|DX39B_RAT;tr|A0A0G2KAT4|A0A0G2KAT4_RAT	2	1	69.99	0.539194	0.999949	1.17516	49109.5	ATP-dependent RNA helicase DDX39A OS=Rattus norvegicus OX=10116 GN=Ddx39a PE=2 SV=1	2009.14	2624.17	2392.76	2655.1	19070.5	22612.3	2591.63	5974.2	14130.1	3434.33	27859.5	6371.29
tr|D3ZM21|D3ZM21_RAT	6	5	322.84	0.539746	0.999949	1.21048	28987	Catechol-O-methyltransferase domain containing 1 (Predicted), isoform CRA_a OS=Rattus norvegicus OX=10116 GN=Comtd1 PE=1 SV=1	175510	368115	64505.3	89204.2	166696	69922.7	42330.4	232492	54062.3	294063	81561.7	67047.2
P38983|RSSA_RAT	6	5	312.6	0.540097	0.999949	1.65582	32824	40S ribosomal protein SA OS=Rattus norvegicus OX=10116 GN=Rpsa PE=1 SV=3	246444	200598	175962	218622	84487.3	10492.2	118209	173234	43439	156996	30284.1	43482.8
Q2LAP6|TES_RAT	1	1	21.1	0.540192	0.999949	1.73522	47632.1	Testin OS=Rattus norvegicus OX=10116 GN=Tes PE=1 SV=1	8.05568	252.643	9635.61	11.1404	1063.63	9.58193	2496.86	245.025	16.5491	887.105	29.0934	2653.48
P11884|ALDH2_RAT;tr|F1LN88|F1LN88_RAT	10	6	420.27	0.54059	0.999949	1.06766	56488.5	Aldehyde dehydrogenase, mitochondrial OS=Rattus norvegicus OX=10116 GN=Aldh2 PE=1 SV=1	109699	121447	159200	144474	72252	32074.4	130002	259679	121859	149933	13726.7	7192.07
tr|D4A4R1|D4A4R1_RAT	1	1	57.01	0.541676	0.999949	3.27006	95640.4	EMAP-like 3 OS=Rattus norvegicus OX=10116 GN=Eml3 PE=1 SV=2	56.1284	1378.17	781.107	0	37.2694	141.721	0.592194	0	0	359.188	7344.58	125.467
Q9WUD9|SRC_RAT	12	7	526.47	0.541753	0.999949	7.36952	59973	Proto-oncogene tyrosine-protein kinase Src OS=Rattus norvegicus OX=10116 GN=Src PE=1 SV=4	478.806	1622.77	4752.03	1629.29	8454.25	6038.93	3462.5	1826.58	618.154	1091.54	144836	17487.9
tr|G3V965|G3V965_RAT	2	2	86.08	0.542129	0.999949	6.02448	41531.5	1-acylglycerol-3-phosphate O-acyltransferase 5 OS=Rattus norvegicus OX=10116 GN=Agpat5 PE=1 SV=2	18021.6	21792.8	17681.3	863.611	24550.7	33211.2	82260	1514.33	542224	57760.4	6391.06	9419.5
O88994|MARC2_RAT;tr|D3Z900|D3Z900_RAT	7	6	254.34	0.542387	0.999949	1.79983	38248.5	Mitochondrial amidoxime reducing component 2 OS=Rattus norvegicus OX=10116 GN=Mtarc2 PE=2 SV=1	201694	277532	146196	33123.3	13134.7	644384	153520	484660	1.06088e+06	411806	8631.68	249190
Q5XIC1|GMPPA_RAT;tr|A0A0G2K824|A0A0G2K824_RAT	1	1	46.6	0.542738	0.999949	30.304	46191.1	Mannose-1-phosphate guanyltransferase alpha OS=Rattus norvegicus OX=10116 GN=Gmppa PE=2 SV=1	20.7249	39.9899	70.6788	140.948	0	31.3432	0	2.07126	0	56.4413	9144.35	0
P97629|LCAP_RAT;tr|A0A0G2JUW8|A0A0G2JUW8_RAT;tr|A0A0G2JYN3|A0A0G2JYN3_RAT	19	16	854.38	0.543003	0.999949	1.05557	117201	Leucyl-cystinyl aminopeptidase OS=Rattus norvegicus OX=10116 GN=Lnpep PE=1 SV=1	398369	717729	415053	585300	474320	1.64556e+06	469456	1.31341e+06	1.06057e+06	919192	180082	70584.9
Q6MG06|GNL1_RAT;tr|A0A0G2K444|A0A0G2K444_RAT;tr|A0A0G2K6Q5|A0A0G2K6Q5_RAT	4	4	156.43	0.543433	0.999949	1.14642	68707.1	Guanine nucleotide-binding protein-like 1 OS=Rattus norvegicus OX=10116 GN=Gnl1 PE=1 SV=1	7547.29	7886.56	21901.3	23920.5	18833.7	44994.6	19209.4	1480.14	13443.1	7614.94	28338.5	39022.2
D4A1R8|CPNE1_RAT	6	4	229.02	0.543743	0.999949	2.13045	58843.7	Copine-1 OS=Rattus norvegicus OX=10116 GN=Cpne1 PE=1 SV=1	20549	56045.3	117800	12256.6	37818.8	293725	39035.5	12736.1	36873.6	48371.9	81565.4	34038.2
O54980|SNG2_RAT;tr|M0R446|M0R446_RAT	2	2	67.38	0.543969	0.999949	3.54662	24710.9	Synaptogyrin-2 OS=Rattus norvegicus OX=10116 GN=Syngr2 PE=1 SV=2	147475	10818.2	61544.4	2.04331e+06	422630	43225.8	22584.1	301312	30895.6	12863.2	191673	210136
P63319|KPCG_RAT	32	22	1437.44	0.544044	0.999949	1.22858	78357.7	Protein kinase C gamma type OS=Rattus norvegicus OX=10116 GN=Prkcg PE=1 SV=1	368454	1.19497e+06	780012	1.21394e+06	104028	274211	440753	1.18165e+06	575684	876430	38595.5	90273.2
P84817|FIS1_RAT	4	3	208.84	0.54482	0.999949	1.09599	16994.6	Mitochondrial fission 1 protein OS=Rattus norvegicus OX=10116 GN=Fis1 PE=1 SV=1	74374.7	209133	18177.8	117414	467005	415359	261353	343354	415319	249218	73167.5	83984.7
tr|D4A7L4|D4A7L4_RAT	4	4	198.13	0.544994	0.999949	1.48104	17634	Complex I-ESSS OS=Rattus norvegicus OX=10116 GN=Ndufb11 PE=1 SV=1	87326.8	284244	45245.6	351109	17621	23381.4	179603	27649.2	53915.7	261258	10752	13013.2
tr|B2GV74|B2GV74_RAT	5	3	190.93	0.545082	0.999949	14.744	68611.2	Kinesin light chain OS=Rattus norvegicus OX=10116 GN=Klc2 PE=1 SV=1	357.583	1189.53	402.693	383.823	1744.19	84.3619	522.674	94.3276	84.1624	1499.33	57647.9	1518.65
tr|D3ZUM4|D3ZUM4_RAT	4	4	185.58	0.545411	0.999949	1.7653	73228	Beta-galactosidase OS=Rattus norvegicus OX=10116 GN=Glb1 PE=1 SV=1	334410	310864	167704	87854.1	112048	128292	203583	363154	764986	336226	25776.1	320784
Q5M868|GBA2_RAT;tr|D4A6U0|D4A6U0_RAT	5	2	204.78	0.54567	0.999949	8.58452	102747	Non-lysosomal glucosylceramidase OS=Rattus norvegicus OX=10116 GN=Gba2 PE=2 SV=2	33.4582	793.299	6741.52	19.6476	187.859	38.1714	711.131	13.8897	8.93469	187.005	24606.7	41551.4
tr|A0A0G2JTL4|A0A0G2JTL4_RAT;tr|Q63116|Q63116_RAT	12	7	397.82	0.545734	0.999949	2.01746	108956	Mast/stem cell growth factor receptor OS=Rattus norvegicus OX=10116 GN=Kit PE=1 SV=1	9543.33	20773.4	41314.5	120.022	21126.6	386.992	62511	64614.8	483.923	20999.7	784.253	38764.3
Q920L2|SDHA_RAT	23	22	1062.33	0.545928	0.999949	1.50522	71615.2	Succinate dehydrogenase [ubiquinone] flavoprotein subunit, mitochondrial OS=Rattus norvegicus OX=10116 GN=Sdha PE=1 SV=1	1.0151e+06	2.29953e+06	627537	271724	103817	181848	1.6769e+06	1.02571e+06	1.1304e+06	2.61967e+06	229281	90856.9
P62944|AP2B1_RAT;tr|Q3ZB97|Q3ZB97_RAT	37	21	1735.56	0.545938	0.999949	1.34404	104553	AP-2 complex subunit beta OS=Rattus norvegicus OX=10116 GN=Ap2b1 PE=1 SV=1	2.70239e+06	1.81006e+06	783090	813211	424346	2.02497e+06	2.34089e+06	3.18107e+06	3.08325e+06	1.6857e+06	478542	732931
tr|B5DF65|B5DF65_RAT	4	4	152.86	0.546086	0.999949	1.996	22094.2	Biliverdin reductase B OS=Rattus norvegicus OX=10116 GN=Blvrb PE=1 SV=1	82966.8	30289.6	47145.4	43561.9	8776.32	16488.1	36917.4	7875.82	258271	33071.1	92543.5	28859.4
P04785|PDIA1_RAT	36	34	1925.66	0.546793	0.999949	1.11117	56951.4	Protein disulfide-isomerase OS=Rattus norvegicus OX=10116 GN=P4hb PE=1 SV=2	1.93969e+06	3.53434e+06	1.29504e+06	2.87665e+06	1.70186e+06	2.54038e+06	2.16559e+06	3.91743e+06	5.77145e+06	2.72481e+06	733682	118889
tr|Q5RKH2|Q5RKH2_RAT	1	1	33.25	0.546928	0.999949	11.8992	42376.4	Galactokinase 1 OS=Rattus norvegicus OX=10116 GN=Galk1 PE=1 SV=1	101.383	2586.08	807.361	222.343	0	95.7451	3317.1	0	15.4057	4326.59	36327.2	1384.46
tr|B2GUW3|B2GUW3_RAT	1	1	36.26	0.547261	0.999949	1.8677	39338.3	Hdac11 protein OS=Rattus norvegicus OX=10116 GN=Hdac11 PE=2 SV=1	305550	528467	342529	17514.4	98211.2	1913.47	441511	762587	475378	709944	20332.8	7402.29
Q63564|SV2B_RAT	19	14	978.61	0.547454	0.999949	1.0174	77502.5	Synaptic vesicle glycoprotein 2B OS=Rattus norvegicus OX=10116 GN=Sv2b PE=1 SV=1	765475	679618	281990	441454	944357	1.57414e+06	621501	1.23853e+06	1.57085e+06	669611	7847.28	660266
tr|B5DFK9|B5DFK9_RAT;tr|F1LRI5|F1LRI5_RAT	1	1	30.16	0.547504	0.999949	1.07764	141391	Gcn1l1 protein (Fragment) OS=Rattus norvegicus OX=10116 GN=Gcn1l1 PE=2 SV=1	408.103	3534.31	17363.7	1460.43	24177.1	16701.8	9995.83	4386.32	6247.62	2104.89	14692.2	31160.1
tr|B0BN11|B0BN11_RAT;tr|D3ZVQ3|D3ZVQ3_RAT	3	3	102.64	0.547634	0.999949	1.60141	35173.5	Porcn protein OS=Rattus norvegicus OX=10116 GN=Porcn PE=2 SV=1	520283	1.00709e+06	911115	229625	456911	1.7834e+06	977534	1.59105e+06	3.58354e+06	1.09671e+06	347240	264309
Q4KLG9|ZFN2B_RAT	1	1	44.69	0.547864	0.999949	448.748	27925.4	AN1-type zinc finger protein 2B OS=Rattus norvegicus OX=10116 GN=Zfand2b PE=1 SV=1	0	0	0	0	15.9861	53.1349	0	56.6542	0	0	30961.2	0
Q99ND9|RWDD1_RAT	1	1	23.2	0.548587	0.999949	1.83961	27782.5	RWD domain-containing protein 1 OS=Rattus norvegicus OX=10116 GN=Rwdd1 PE=2 SV=1	57.7225	3161.7	2198.76	8019.27	1261.25	3393.36	1249.32	0.699207	48.2144	4872.78	23015	4096.37
P13596|NCAM1_RAT;tr|F1LNY3|F1LNY3_RAT	81	11	4780.09	0.548674	0.999949	1.35324	94658.3	Neural cell adhesion molecule 1 OS=Rattus norvegicus OX=10116 GN=Ncam1 PE=1 SV=1	2.36431e+06	2.50774e+06	2.17295e+06	435167	3.11944e+06	1.7286e+06	3.62585e+06	3.01633e+06	4.34645e+06	2.34332e+06	480904	2.87012e+06
Q68FX9|SIR5_RAT	1	1	44.65	0.54891	0.999949	2.46034	34098.3	NAD-dependent protein deacylase sirtuin-5, mitochondrial OS=Rattus norvegicus OX=10116 GN=Sirt5 PE=2 SV=1	3820.71	31854.6	2438.45	442.328	3073.66	516.41	2562.23	2212.13	618.654	4977.75	89077.8	4245.23
P05982|NQO1_RAT	1	1	32.54	0.549089	0.999949	26.5499	30946.6	NAD(P)H dehydrogenase [quinone] 1 OS=Rattus norvegicus OX=10116 GN=Nqo1 PE=1 SV=4	52.8175	626.118	1094.84	71.1257	137.903	0	1210.24	43.4309	5.06396	209.195	51136.9	38.439
P09606|GLNA_RAT	39	34	2189.64	0.549558	0.999949	1.41513	42267.8	Glutamine synthetase OS=Rattus norvegicus OX=10116 GN=Glul PE=1 SV=3	4.4177e+06	2.14158e+06	5.89749e+06	644417	251143	1.13203e+07	2.43657e+06	3.08221e+06	9.6096e+06	1.96334e+06	98616	244554
Q5BJQ2|MINY1_RAT	1	1	27.71	0.54989	0.999949	3.14506	52728.9	Ubiquitin carboxyl-terminal hydrolase MINDY-1 OS=Rattus norvegicus OX=10116 GN=Mindy1 PE=2 SV=1	365.302	1264.05	12599.9	52.4538	27749.1	5.7758	4726.54	43.7505	0.30304	1138.96	27.4297	7428.92
P62961|YBOX1_RAT;tr|D3ZEV0|D3ZEV0_RAT;tr|Q3ZAV2|Q3ZAV2_RAT;tr|Q76MJ6|Q76MJ6_RAT	1	1	62.28	0.549945	0.999949	11.7991	35730	Y-box-binding protein 1 OS=Rattus norvegicus OX=10116 GN=Ybx1 PE=2 SV=3	9.6011	0	4.92275	0	851.811	0	1027.42	0	0	0	9182.74	11.7938
D4AD37|IMPA3_RAT;tr|Q7TPJ5|Q7TPJ5_RAT	3	2	134.77	0.550084	0.999949	1.49768	38569.4	Golgi-resident adenosine 3',5'-bisphosphate 3'-phosphatase OS=Rattus norvegicus OX=10116 GN=Bpnt2 PE=3 SV=1	367.874	4127.39	13371.4	2744.35	14605.8	5970.04	10963.8	6389	518.979	7054.72	16526.9	20231.4
tr|B5DFJ7|B5DFJ7_RAT	2	2	52.17	0.550924	0.999949	4.22862	20589	Tmem9 protein OS=Rattus norvegicus OX=10116 GN=Tmem9 PE=2 SV=1	1424.19	598.759	1260.05	5783.42	858.476	2094.36	1079.88	2462.06	603.583	1413.86	43777.1	1488.36
tr|D4A3X6|D4A3X6_RAT	13	9	550.64	0.551193	0.999949	1.08713	130935	Phospholipid-transporting ATPase OS=Rattus norvegicus OX=10116 GN=Atp8a2 PE=1 SV=3	30625.5	166621	106612	72418.2	146629	79919.7	76456.6	114549	68278.3	191856	4450.81	98919
Q08851|STX5_RAT	3	3	102.03	0.551288	0.999949	1.92217	39750.6	Syntaxin-5 OS=Rattus norvegicus OX=10116 GN=Stx5 PE=1 SV=2	2119.99	46.7442	301.935	15712.6	100.508	73.5664	116.558	4.54124	0	999.228	4874.95	3554
P35565|CALX_RAT	61	57	3617.27	0.5514	0.999949	1.17294	67255	Calnexin OS=Rattus norvegicus OX=10116 GN=Canx PE=1 SV=1	2.75344e+06	7.22662e+06	4.04122e+06	2.17431e+06	1.27353e+07	1.01084e+07	4.48716e+06	6.15999e+06	1.15516e+07	6.10723e+06	230034	4.74714e+06
Q4KM33|PLEK_RAT	1	1	27.23	0.551671	0.999949	47.7529	39995.8	Pleckstrin OS=Rattus norvegicus OX=10116 GN=Plek PE=1 SV=1	108.801	40.6037	0	41.3215	0	0	0	0	31.032	0	7299.75	1776.96
tr|B1WBU9|B1WBU9_RAT;tr|G3V8V3|G3V8V3_RAT	20	7	837.18	0.552567	0.999949	1.61295	97322.4	Alpha-1,4 glucan phosphorylase OS=Rattus norvegicus OX=10116 GN=Pygm PE=2 SV=1	555.609	17477.1	66474.1	577.695	28009.4	2852.97	18486.9	3957.18	602.366	8375.49	48020.6	107574
P04897|GNAI2_RAT;tr|Q45QN0|Q45QN0_RAT	31	13	1893.65	0.553338	0.999949	1.46322	40499	Guanine nucleotide-binding protein G(i) subunit alpha-2 OS=Rattus norvegicus OX=10116 GN=Gnai2 PE=1 SV=3	5.00557e+06	2.81029e+06	5.06146e+06	685765	1.19699e+06	1.25746e+07	3.58499e+06	3.66896e+06	7.0089e+06	2.64915e+06	131165	1.63809e+06
tr|D3ZWP6|D3ZWP6_RAT	17	5	696.51	0.553892	0.999949	16.5503	211602	Plexin A2 OS=Rattus norvegicus OX=10116 GN=Plxna2 PE=3 SV=1	419.589	262.52	1330.03	478.957	198.106	708.559	877.52	147.457	59.6241	398.119	52132.5	2618.81
O08838|AMPH_RAT;tr|A0A0G2JX32|A0A0G2JX32_RAT;tr|A0A0G2K5Z4|A0A0G2K5Z4_RAT;tr|F1LPP0|F1LPP0_RAT	16	13	768.14	0.553893	0.999949	1.60427	74877.9	Amphiphysin OS=Rattus norvegicus OX=10116 GN=Amph PE=1 SV=1	358623	138934	715128	96195.3	21057.7	205856	157837	191237	357826	201594	33198.9	15624.8
Q704S8|CACP_RAT;tr|A0A0H2UI21|A0A0H2UI21_RAT	4	4	175.13	0.554062	0.999949	1.26323	70800.8	Carnitine O-acetyltransferase OS=Rattus norvegicus OX=10116 GN=Crat PE=1 SV=1	100381	72703.3	46378.2	46442.8	38342.8	2102.84	91762	113701	78041.4	59784.8	9257.03	34443.7
F1M4A4|KIF1A_RAT	3	1	125.8	0.554106	0.999949	2.07698	192933	Kinesin-like protein KIF1A OS=Rattus norvegicus OX=10116 GN=Kif1a PE=1 SV=3	243.639	0	0	0	541.89	4167.48	0	0	0	114.094	2270.61	0.00977538
P31421|GRM2_RAT	12	7	414.35	0.554349	0.999949	1.32218	95773.9	Metabotropic glutamate receptor 2 OS=Rattus norvegicus OX=10116 GN=Grm2 PE=1 SV=1	70465.8	90197.7	71458.8	7463.81	90788.8	76107.5	103353	60968.9	172873	100774	16934.1	82539.4
tr|A0A0G2K8N7|A0A0G2K8N7_RAT;tr|A0A1B0GWP1|A0A1B0GWP1_RAT;tr|Q5U2Z8|Q5U2Z8_RAT	1	1	71.5	0.55478	0.999949	166.48	24900.7	Elongation of very long chain fatty acids protein (Fragment) OS=Rattus norvegicus OX=10116 GN=Elovl1 PE=3 SV=1	0	186.6	0	0	307.222	0	0	0	0	0	65996.2	16215.4
Q6UVM4|KCNT2_RAT;Q9Z258|KCNT1_RAT;tr|A0A0G2K0H1|A0A0G2K0H1_RAT;tr|D3ZNI9|D3ZNI9_RAT;tr|F1LSG1|F1LSG1_RAT	1	1	21.71	0.555016	0.999949	5.72619	131100	Potassium channel subfamily T member 2 OS=Rattus norvegicus OX=10116 GN=Kcnt2 PE=1 SV=1	4730.72	0	0.210156	212.221	92.1982	112.033	7.55843e-05	1129.97	348.858	54.2536	27917.9	23.9333
P45592|COF1_RAT	20	12	1128.69	0.55536	0.999949	1.61409	18532.5	Cofilin-1 OS=Rattus norvegicus OX=10116 GN=Cfl1 PE=1 SV=3	1.1739e+07	4.89274e+06	9.78159e+06	350469	1.49253e+07	9.36803e+06	6.7579e+06	4.3882e+06	7.91245e+06	4.79506e+06	139308	7.63916e+06
tr|D3ZKY6|D3ZKY6_RAT	1	1	22.16	0.556756	0.999949	5.40328	40997.5	Ankyrin repeat domain 63 OS=Rattus norvegicus OX=10116 GN=Ankrd63 PE=1 SV=1	175.457	420.905	1973.06	74.782	397.57	6108.25	1874.85	783.377	135.403	207.973	45737.7	700.866
P20236|GBRA3_RAT	8	3	426.3	0.557307	0.999949	1.84618	55430	Gamma-aminobutyric acid receptor subunit alpha-3 OS=Rattus norvegicus OX=10116 GN=Gabra3 PE=1 SV=2	221425	255554	188710	7405.97	56121.1	44442.4	341106	298618	418807	308305	6486.9	54989.3
P17077|RL9_RAT;tr|A0A0G2JXD0|A0A0G2JXD0_RAT;tr|Q6P9U5|Q6P9U5_RAT	3	2	130.58	0.558552	0.999949	1.30615	21893.4	60S ribosomal protein L9 OS=Rattus norvegicus OX=10116 GN=Rpl9 PE=1 SV=1	218464	191122	91180.5	78617	6043.07	98305.4	88118.9	213885	66301.2	138151	12931	4085.41
P22057|PTGDS_RAT	2	2	83.23	0.558739	0.999949	2.54489	21301.3	Prostaglandin-H2 D-isomerase OS=Rattus norvegicus OX=10116 GN=Ptgds PE=1 SV=2	244179	17659.5	22332.4	27116.4	419116	553576	46463.9	72109.3	13918	29306.5	127437	215298
Q99P39|NFS1_RAT;tr|Q3MHT2|Q3MHT2_RAT;tr|Q5FWU2|Q5FWU2_RAT	1	1	22.38	0.559644	0.999949	6.25818	50012.6	Cysteine desulfurase, mitochondrial OS=Rattus norvegicus OX=10116 GN=Nfs1 PE=2 SV=1	2248.37	2441.05	1278.84	217.627	508.081	1259.34	7755.64	1569.06	113.516	889.298	38873.7	572.079
tr|A0A0G2K5E7|A0A0G2K5E7_RAT;tr|G3V888|G3V888_RAT	25	24	1181.5	0.559879	0.999949	1.04573	120543	ATP-citrate synthase OS=Rattus norvegicus OX=10116 GN=Acly PE=1 SV=1	396039	123905	356076	453313	121068	533085	212831	423102	874201	243537	39851.2	103221
P17702|RL28_RAT;tr|D3ZEI0|D3ZEI0_RAT;tr|D3ZJD3|D3ZJD3_RAT;tr|Q642E2|Q642E2_RAT	3	3	141.92	0.559913	0.999949	2.14562	15848.6	60S ribosomal protein L28 OS=Rattus norvegicus OX=10116 GN=Rpl28 PE=1 SV=4	12572	10266	17776.2	9428.76	61423.4	261.917	36263.2	58137.5	360.344	5834.47	74939.9	64191.2
tr|D4ACM1|D4ACM1_RAT	1	1	25.9	0.559984	0.999949	12.9953	62361.1	Elongator complex protein 3 OS=Rattus norvegicus OX=10116 GN=Elp3 PE=1 SV=2	1778.73	85.7167	388.182	1080	378.386	2580.68	341.098	3807.19	3575.74	40.379	73670.8	327.336
Q9Z2Q1|SC31A_RAT;tr|A0A0G2K0X9|A0A0G2K0X9_RAT;tr|G3V699|G3V699_RAT	2	2	70.57	0.560291	0.999949	2.6189	135272	Protein transport protein Sec31A OS=Rattus norvegicus OX=10116 GN=Sec31a PE=1 SV=2	283128	19708	100825	19153	70281	4102.46	10761.5	14441.9	70806.9	32405.6	16618.8	44815.2
tr|F1M403|F1M403_RAT	6	6	185.5	0.56058	0.999949	1.33994	125276	Ubiquitin-conjugating enzyme E2O OS=Rattus norvegicus OX=10116 GN=Ube2o PE=1 SV=2	405199	155218	280822	4216.07	69569.3	31327.6	123925	259043	614980	149338	11819.9	108949
P35332|HPCL4_RAT	10	6	512.01	0.560845	0.999949	1.1832	22245.4	Hippocalcin-like protein 4 OS=Rattus norvegicus OX=10116 GN=Hpcal4 PE=2 SV=2	88420.8	238720	221614	87996.6	267232	123795	139717	77381.4	143529	266152	181447	60414.6
tr|Q5XIC6|Q5XIC6_RAT	3	3	137.14	0.56166	0.999949	2.18697	52936.4	Proteasome (Prosome, macropain) 26S subunit, non-ATPase, 12 OS=Rattus norvegicus OX=10116 GN=Psmd12 PE=1 SV=1	183521	116955	3427.38	76696	111214	186017	75448.3	45208	37445.3	84776.2	41904.6	25157.6
tr|Q7TP42|Q7TP42_RAT	4	4	167.17	0.561707	0.999949	1.00452	67930.8	Translocation protein SEC62 OS=Rattus norvegicus OX=10116 GN=Sec62 PE=1 SV=1	141358	227322	133052	163825	367378	589458	167224	324655	712582	229964	8108.88	187192
tr|B4F7C7|B4F7C7_RAT	4	3	176.74	0.56198	0.999949	2.89502	21123.9	Hebp1 protein OS=Rattus norvegicus OX=10116 GN=Hebp1 PE=1 SV=1	182237	55.0742	7212.59	134163	213256	128197	721.205	62787.2	71793	826.954	3104.14	90513.6
P41498|PPAC_RAT;tr|Z4YNF4|Z4YNF4_RAT	3	2	155.34	0.562482	0.999949	1.54011	18151.6	Low molecular weight phosphotyrosine protein phosphatase OS=Rattus norvegicus OX=10116 GN=Acp1 PE=1 SV=3	2321.75	8645.44	1336.87	1442.64	27650.7	15066.9	2149.72	37023	1567.96	4772.02	16242.7	25206
O70441|SYN3_RAT;tr|A0A096MIT7|A0A096MIT7_RAT	4	3	218.44	0.562529	0.999949	1.20658	63348.7	Synapsin-3 OS=Rattus norvegicus OX=10116 GN=Syn3 PE=1 SV=1	13576.8	2052.4	3911.44	9943.41	56179.3	15823	9675.45	17860.2	22052.2	2121.55	27909.8	42832.5
Q5RKI0|WDR1_RAT	20	19	922.98	0.562699	0.999949	1.00045	66181.5	WD repeat-containing protein 1 OS=Rattus norvegicus OX=10116 GN=Wdr1 PE=1 SV=3	1.2931e+06	1.08378e+06	1.59943e+06	738036	903355	748821	1.19273e+06	1.43515e+06	2.10811e+06	972736	131521	529153
P28023|DCTN1_RAT;tr|A0A0G2K428|A0A0G2K428_RAT;tr|D4A8U7|D4A8U7_RAT	18	15	750.95	0.563052	0.999949	1.2054	141930	Dynactin subunit 1 OS=Rattus norvegicus OX=10116 GN=Dctn1 PE=1 SV=2	476223	486644	482323	2.28928e+06	416714	299577	238589	482233	2.02004e+06	326997	201329	423166
P14925|AMD_RAT	2	2	100.22	0.563207	0.999949	1.51769	108675	Peptidylglycine alpha-amidating monooxygenase OS=Rattus norvegicus OX=10116 GN=Pam PE=1 SV=1	192221	125281	48116.2	855078	218005	263991	201856	212733	390838	176135	22215.6	118120
Q03114|CDK5_RAT	4	3	120.17	0.563853	0.999949	2.25697	33254.4	Cyclin-dependent-like kinase 5 OS=Rattus norvegicus OX=10116 GN=Cdk5 PE=1 SV=1	83259.3	152793	91870	34515.4	24189	24132.4	59465.2	273155	424046	137005	12614.9	20784.1
tr|B2RYC9|B2RYC9_RAT	10	7	428.53	0.56436	0.999949	1.39794	57491.8	Glucosylceramidase OS=Rattus norvegicus OX=10116 GN=Gba PE=1 SV=1	422065	403211	259408	644489	36733.3	104160	677997	830420	548917	375977	103382	77552.7
Q8R4Z9|MFN1_RAT;tr|A0A0G2K5J3|A0A0G2K5J3_RAT;tr|D3ZR27|D3ZR27_RAT	1	1	41.57	0.564498	0.999949	1.53374	83847.2	Mitofusin-1 OS=Rattus norvegicus OX=10116 GN=Mfn1 PE=1 SV=1	6083.66	2050.49	8696.33	4874.54	6393.86	139.902	1887.33	172.701	156.682	1037.07	34093.1	5964.04
Q9QZQ5|CCN3_RAT	3	3	143.57	0.564627	0.999949	4.26808	38509.6	CCN family member 3 OS=Rattus norvegicus OX=10116 GN=Ccn3 PE=1 SV=1	1489.49	6586.57	522.124	932.023	32635.8	826.902	7369.96	137.925	153148	2948.29	18888.3	1005
tr|A0A0G2JTT6|A0A0G2JTT6_RAT	2	2	58.33	0.564927	0.999949	3.0658	531549	HECT and RLD domain-containing E3 ubiquitin protein ligase family member 1 OS=Rattus norvegicus OX=10116 GN=Herc1 PE=1 SV=1	97.2602	267.959	3620.01	292.688	6.7373	2669.13	418.126	12.1192	0	34.866	20341.8	511.985
tr|E9PTX9|E9PTX9_RAT;tr|Q9QX10|Q9QX10_RAT	15	12	618.97	0.565002	0.999949	1.38191	130366	Solute carrier family 12 member 2 OS=Rattus norvegicus OX=10116 GN=Slc12a2 PE=1 SV=1	211541	215883	96789.8	60115.3	116520	176244	119155	295988	308175	187944	260875	39919.9
Q6PEC1|TBCA_RAT	1	1	35.51	0.565099	0.999949	8.76479	12743.7	Tubulin-specific chaperone A OS=Rattus norvegicus OX=10116 GN=Tbca PE=1 SV=1	617.969	14952.1	2476.78	3316.18	450.046	294.157	5348.34	489.267	14067.5	9.54865	103613	70237.3
tr|Q8R2H0|Q8R2H0_RAT	15	11	792.86	0.566005	0.999949	1.49836	13667.4	V-type proton ATPase subunit G OS=Rattus norvegicus OX=10116 GN=Atp6v1g2 PE=1 SV=1	4.91219e+06	1.28621e+06	1.68276e+06	7.53058e+06	2.00423e+06	264553	1.3855e+06	1.90813e+06	5.84278e+06	1.76889e+06	225408	669219
P0C0A2|VPS36_RAT;tr|B1H248|B1H248_RAT	1	1	32.47	0.566063	0.999949	4.83816	43717.6	Vacuolar protein-sorting-associated protein 36 OS=Rattus norvegicus OX=10116 GN=Vps36 PE=1 SV=1	450.269	36.963	3853.27	155.318	0	1479.15	38.657	65.8407	118.254	70.6116	21009.9	7604.61
P37361|MT3_RAT	1	1	79.74	0.566587	0.999949	2.36887	6809.01	Metallothionein-3 OS=Rattus norvegicus OX=10116 GN=Mt3 PE=2 SV=1	31307	3055.24	912.942	132395	310210	958.123	8807.8	863.05	1664.97	3165.65	4798.32	182838
tr|Q5XI21|Q5XI21_RAT	1	1	45.8	0.567047	0.999949	2.30889	54089	Target of myb1 homolog (Chicken) OS=Rattus norvegicus OX=10116 GN=Tom1 PE=1 SV=1	11.4539	515.144	6576.54	0	47802.3	17.7724	2492.67	0.0369448	0.761789	119.5	0	21174.8
Q9QUH6|SYGP1_RAT;tr|D3ZCL8|D3ZCL8_RAT;tr|F1LQW8|F1LQW8_RAT	7	7	334.84	0.5684	0.999949	1.18315	144722	Ras/Rap GTPase-activating protein SynGAP OS=Rattus norvegicus OX=10116 GN=Syngap1 PE=1 SV=2	506608	416678	565183	93612.4	86716.6	154427	364152	327941	498383	254449	9615.45	86452.7
Q5FVL2|EMC8_RAT	5	4	201.54	0.569029	0.999949	1.16565	23405.5	ER membrane protein complex subunit 8 OS=Rattus norvegicus OX=10116 GN=Emc8 PE=2 SV=1	143824	166655	79434.1	665170	62247.3	196084	131780	307974	257930	161992	75046.7	596265
tr|D3ZWW5|D3ZWW5_RAT	2	2	62.55	0.569575	0.999949	1.06413	62684.3	Solute carrier family 30 member 9 OS=Rattus norvegicus OX=10116 GN=Slc30a9 PE=1 SV=1	24.8212	12220.3	8564.1	54.5677	25429.4	20.9545	14454	241.809	28.1376	7454.7	2517.88	18826.3
A0A0G2JXT6|MTMR6_RAT;tr|D3ZC22|D3ZC22_RAT	1	1	45.48	0.569615	0.999949	7.54855	75577.3	Myotubularin-related protein 6 OS=Rattus norvegicus OX=10116 GN=Mtmr6 PE=1 SV=1	89.8593	0	0	323.835	0	0	0	28.3088	172.986	0	2921.5	0
Q66HR5|CACO1_RAT;tr|A0A0G2K0S1|A0A0G2K0S1_RAT	1	1	42.2	0.570423	0.999949	1.78765	77275.3	Calcium-binding and coiled-coil domain-containing protein 1 OS=Rattus norvegicus OX=10116 GN=Calcoco1 PE=2 SV=1	14.9595	718.45	11006.7	0	31515.2	14.1654	3977.65	97.9799	99.0977	786.935	53.0727	19190
Q8CG09|MRP1_RAT;tr|E9PT28|E9PT28_RAT	3	3	116.57	0.570781	0.999949	1.25109	171492	Multidrug resistance-associated protein 1 OS=Rattus norvegicus OX=10116 GN=Abcc1 PE=1 SV=2	100.538	235.224	1833.1	277.498	2772.19	22.794	805.53	29.7074	848.996	240.611	1866.56	2766.02
tr|Q499V0|Q499V0_RAT	2	1	64.03	0.570987	0.999949	25.2325	22595.2	COMM domain containing 7, isoform CRA_d OS=Rattus norvegicus OX=10116 GN=Commd7 PE=1 SV=1	40.7437	18.7817	0	58.9233	24.1782	321.34	0	31.6107	0	5.97979	11669.5	0
Q3B7D1|UBE2Z_RAT	2	2	63.68	0.571201	0.999949	7.9454	38352.4	Ubiquitin-conjugating enzyme E2 Z OS=Rattus norvegicus OX=10116 GN=Ube2z PE=1 SV=2	18.6885	950.488	3554.38	15.4438	6078.34	447.053	2567.15	156.277	13.9115	376.55	80279.2	4517.89
P56558|OGT1_RAT;tr|G3V6F4|G3V6F4_RAT	4	4	146	0.571337	0.999949	2.10362	115606	UDP-N-acetylglucosamine--peptide N-acetylglucosaminyltransferase 110 kDa subunit OS=Rattus norvegicus OX=10116 GN=Ogt PE=1 SV=1	9729.49	5274.19	27479.2	8392.21	16774.7	246.771	16066.3	2869.87	1269.55	6697.46	62132.1	53793.4
Q6I7R3|ISOC1_RAT;tr|F2Z3T7|F2Z3T7_RAT	3	3	154.53	0.57176	0.999949	1.52369	32002.5	Isochorismatase domain-containing protein 1 OS=Rattus norvegicus OX=10116 GN=Isoc1 PE=1 SV=1	118090	163487	155075	63046.7	8440.97	44366.3	66248.2	220986	142368	333987	15330.6	62928.9
P43425|GBG7_RAT;tr|A0A0G2JSR6|A0A0G2JSR6_RAT	5	5	272.83	0.572055	0.999949	1.16957	7523.72	Guanine nucleotide-binding protein G(I)/G(S)/G(O) subunit gamma-7 OS=Rattus norvegicus OX=10116 GN=Gng7 PE=2 SV=2	1.01762e+06	291576	807748	238860	90862.1	149484	341565	494204	968052	183002	6863.31	226060
P81155|VDAC2_RAT	36	33	2169.57	0.572061	0.999949	1.57592	31745.8	Voltage-dependent anion-selective channel protein 2 OS=Rattus norvegicus OX=10116 GN=Vdac2 PE=1 SV=2	1.32458e+07	2.40965e+07	1.01577e+07	9.66325e+06	1.73358e+06	1.07921e+07	1.92499e+07	2.50471e+07	2.9663e+07	2.9308e+07	3.90781e+06	2.64799e+06
tr|F1LPG9|F1LPG9_RAT	1	1	23.04	0.572186	0.999949	2.78549	145058	WASH complex subunit 2C OS=Rattus norvegicus OX=10116 GN=Washc2c PE=1 SV=2	15.3098	3.63119	1617.81	0	3194.5	16.6863	631.07	3661.37	1768.03	0	0	7443.37
Q6DGG1|ABHEB_RAT	2	2	63	0.572336	0.999949	1.53924	22617.9	Protein ABHD14B OS=Rattus norvegicus OX=10116 GN=Abhd14b PE=2 SV=1	33164.8	3862.99	8038.4	4173.9	56114.2	27106.5	2894.06	5400.35	14417.3	3576.06	26883.2	32885.1
O35431|APBA2_RAT	3	1	88.56	0.572593	0.999949	2.2396	82850.2	Amyloid-beta A4 precursor protein-binding family A member 2 OS=Rattus norvegicus OX=10116 GN=Apba2 PE=1 SV=1	421.543	115.585	248.853	259.643	70.8166	1435.55	212.887	510.813	134.82	275.126	4391.58	190.209
Q5XIF5|DEGS1_RAT	1	1	70.65	0.572772	0.999949	2.05829	38055.1	Sphingolipid delta(4)-desaturase DES1 OS=Rattus norvegicus OX=10116 GN=Degs1 PE=2 SV=1	35952.7	149954	71206.2	32485.6	16648.3	28085.9	49848.6	188855	271429	153018	15685.3	9318.88
tr|D3ZKE0|D3ZKE0_RAT	1	1	55.54	0.573015	0.999949	3.43324	140017	N-acetylglucosamine-1-phosphate transferase subunits alpha and beta OS=Rattus norvegicus OX=10116 GN=Gnptab PE=3 SV=1	8902.61	751.762	566.286	1077.08	3537.53	8287.43	2858.07	2788.13	46453.8	1144.69	25861.4	279.659
Q5U2P1|CNNM2_RAT	1	1	28.06	0.573184	0.999949	9.1476	96609.2	Metal transporter CNNM2 OS=Rattus norvegicus OX=10116 GN=Cnnm2 PE=2 SV=1	0	75.7361	164.375	0	397.445	0	45.7932	39.5652	0	0	5493.62	253.136
P12075|COX5B_RAT	9	8	438.73	0.573282	0.999949	1.5635	13914.9	Cytochrome c oxidase subunit 5B, mitochondrial OS=Rattus norvegicus OX=10116 GN=Cox5b PE=1 SV=2	2.60746e+06	5.26861e+06	2.67896e+06	2.08453e+06	2.71716e+06	4.47014e+06	5.43188e+06	5.02566e+06	7.02127e+06	6.12952e+06	528176	6.86281e+06
Q7TPB1|TCPD_RAT	18	12	773.06	0.573401	0.999949	1.37353	58099.5	T-complex protein 1 subunit delta OS=Rattus norvegicus OX=10116 GN=Cct4 PE=1 SV=3	272873	185519	332311	325682	160920	185932	306206	357296	298547	222903	89873.8	734978
tr|F1LT94|F1LT94_RAT	1	1	33.68	0.573477	0.999949	1.61822	132213	Rho/Rac guanine nucleotide exchange factor 18 OS=Rattus norvegicus OX=10116 GN=Arhgef18 PE=1 SV=2	2.49222	0	1037.51	11.1672	3156.34	1.06757	63.3752	0	0	0	0	6747.05
tr|D3ZWL6|D3ZWL6_RAT	12	1	672.64	0.573936	0.999949	1.27344	66817.4	Adenosylhomocysteinase-like 2 OS=Rattus norvegicus OX=10116 GN=Ahcyl2 PE=1 SV=3	94215.3	31927	64567.4	14928.6	27275.9	96574.3	35070.4	21854.4	119051	27222	29470.2	26069.5
P68182|KAPCB_RAT	14	4	631.32	0.574308	0.999949	2.30856	40707.9	cAMP-dependent protein kinase catalytic subunit beta OS=Rattus norvegicus OX=10116 GN=Prkacb PE=1 SV=2	862430	290433	827810	113894	202882	4.79214e+06	515871	739066	1.25484e+06	320009	133929	107281
tr|A0A0G2JXZ9|A0A0G2JXZ9_RAT	5	4	151.65	0.574337	0.999949	1.61702	141816	Protein-tyrosine-phosphatase OS=Rattus norvegicus OX=10116 GN=Ptprj PE=1 SV=1	77686.8	123049	75522	39.3911	14734.1	44.9951	15615.4	75100	3497.24	57495.7	1063.21	27236.4
tr|A0A0G2JXM0|A0A0G2JXM0_RAT;tr|A0A0G2K2J9|A0A0G2K2J9_RAT;tr|A0A0G2KA58|A0A0G2KA58_RAT;tr|D3ZHI1|D3ZHI1_RAT;tr|D3ZVL1|D3ZVL1_RAT	1	1	33.73	0.575299	0.999949	4.30396	85654.1	MIA SH3 domain ER export factor 2 OS=Rattus norvegicus OX=10116 GN=Mia2 PE=1 SV=1	392.593	249.729	107.13	233.753	1058.56	1637.77	628.134	326.278	71.0199	438.18	13531.3	841.607
tr|A0A0G2K1M5|A0A0G2K1M5_RAT	2	2	50.89	0.575437	0.999949	2.08988	49463	Divergent protein kinase domain 2A OS=Rattus norvegicus OX=10116 GN=Dipk2a PE=1 SV=1	3662.28	166.798	172.988	6539.76	4311.17	209.547	290.545	1441.48	21643.4	227.29	6161.04	1715.16
tr|O55158|O55158_RAT	2	2	57.5	0.575487	0.999949	17.7403	25545.2	Tetraspanin OS=Rattus norvegicus OX=10116 GN=Tspan8 PE=2 SV=2	176.666	155.066	5299.68	48.6188	24.0514	257.573	67.6202	35.1103	2137.51	90.1911	103288	143.648
B5DF51|EMC5_RAT	1	1	57.57	0.575727	0.999949	1.1333	14676.8	ER membrane protein complex subunit 5 OS=Rattus norvegicus OX=10116 GN=Mmgt1 PE=2 SV=1	28512.7	29241.4	24951	22499.4	674.039	130838	2260.53	74175.2	2319.55	58309.7	71348.3	461.114
P49621|DGKB_RAT	1	1	29.04	0.575754	0.999949	50.2427	90288	Diacylglycerol kinase beta OS=Rattus norvegicus OX=10116 GN=Dgkb PE=1 SV=1	1.16199	8.19475	0	0	112	34.5655	24.4252	0	0	0	7452.59	356.934
tr|F1LYA6|F1LYA6_RAT;tr|O35823|O35823_RAT	5	2	209.7	0.575755	0.999949	1.33892	59300.3	Abl-interactor 2 OS=Rattus norvegicus OX=10116 GN=Abi2 PE=3 SV=3	337.703	208.069	3556.9	50.082	11589.9	133.234	914.578	17.0833	7.97106	30.7652	5729.39	5157.48
Q5FVJ6|BSCL2_RAT	2	1	61.73	0.576136	0.999949	2.27497	42409.1	Seipin OS=Rattus norvegicus OX=10116 GN=Bscl2 PE=1 SV=1	49938.7	112936	2279.89	11895.5	26340.3	1.17091e+06	80811.5	237477	147313	82337.7	43143.7	13013.7
[truncated: 1,923 more rows]

## Sheet: 2 uni pep FC1.5 p<0.05
Accession	Peptide count	Unique peptides	Confidence score	Anova (p)	q Value	Max fold change	Mass	Description	S1	S2	S3	S4	S5	S6	SAL-Avg	M1	M2	M3	M4	M5	M6	MDZ-Avg	FC (M/S)	TTEST
[truncated: 15 more rows]
