# Supplementary material for: Identification of YWHAH as a Novel Brain-Derived Extracellular Vesicle Marker Post Long-Term Midazolam Exposure during Early Development
Source: Cells. 2023 Mar 22;12(6):966. doi: 10.3390/cells12060966 (PMC10047367; doi:10.3390/cells12060966)
Supplement: Supplementary file 1 [file cells-12-00966-s001.zip › !Supplemental files/Table S4.xlsx]

## Sheet: Gene info
ESCRT Complex	Gene	Definition	mRNA Accession Number	Assay ID	Availability	Gene Alias(es)	RefSeq(s)	GenBank mRNA(s)	Species	Amplicon Length	Best Coverage	3' Most
House keeping	18s rRNA	House keeping gene standard in all Taqman fast array plates		Hs99999901_s1	-	-	-	-	Human	0	No	No
	Gapdh	Rattus norvegicus glyceraldehyde-3-phosphate dehydrogenase (Gapdh), mRNA.	NM_017008	Rn01775763_g1	INV	BARS-38;Gapd	NM_017008.4	AB017801.1;M17701.1;BC087743.1;M29341.1;X02231.1;M11561.1;BC059110.1	Rat	174	Yes	Yes
ESCRT-0	Hgs	Rattus norvegicus hepatocyte growth factor-regulated tyrosine kinase substrate (Hgs), mRNA.	NM_019387	Rn00571453_m1	INV	Hrs	NM_019387.2;XM_006247909.2;XM_006247908.2	AB002811.1;U87863.1;AF036344.1;BC083561.1	Rat	119	Yes	No
	Stam	Rattus norvegicus signal transducing adaptor molecule (Stam), mRNA.	NM_001109121	Rn00488446_m1	INV	RGD1564499	NM_001109121.2	BC168933.1;FQ221736.1	Rat	63	Yes	No
	Stam2	Rattus norvegicus signal transducing adaptor molecule 2 (Stam2), mRNA.	NM_001012085	Rn01753875_m1	INV	-	NM_001012085.1	BC083912.1	Rat	67	Yes	Yes
ESCRT-1	Mvb12a	Rattus norvegicus multivesicular body subunit 12A (Mvb12a), mRNA.	NM_199375	Rn01420199_g1	MTO	Fam125a	NM_199375.1;XM_006252860.2	FQ233380.1;BC061799.1;FQ231372.1;FQ234388.1	Rat	89	Yes	No
	Mvb12b	Rattus norvegicus multivesicular body subunit 12B (Mvb12b), mRNA.	NM_001271232	Rn01758677_m1	MTO	Fam125b;RGD1309709	XM_008761761.1;NM_001271232.1	-	Rat	56	Yes	No
	Tsg101	Rattus norvegicus tumor susceptibility 101 (Tsg101), mRNA.	NM_181628	Rn01475919_m1	MTO	Rw	NM_181628.2;XM_008759341.1	BC070951.1;AY293306.1	Rat	72	Yes	No
	Ubap1	Rattus norvegicus ubiquitin-associated protein 1 (Ubap1), mRNA	NM_001012190	Rn01436891_m1	MTO	UBAP-1	NM_001012190.1;XM_008763626.1	BC083594.1	Rat	66	Yes	No
	Vps28	Rattus norvegicus VPS28 subunit of ESCRT-I (Vps28), mRNA.	NM_001130492	Rn01768031_g1	MTO	-	NM_001130492.1	FQ225519.1	Rat	60	Yes	No
	Vps37a	Rattus norvegicus VPS37A subunit of ESCRT-I (Vps37a), mRNA.	NM_001024867	Rn01488400_m1	INV	-	NM_001024867.1;XM_008771289.1	BC098069.1;FQ232149.1	Rat	70	Yes	Yes
	Vps37b	Rattus norvegicus VPS37B subunit of ESCRT-I (Vps37b), mRNA.	NM_001105928	Rn02106669_s1	MTO	RGD1304576	XM_006249332.2;NM_001105928.1	-	Rat	106	Yes	No
	Vps37c	Rattus norvegicus VPS37C, ESCRT-I subunit (Vps37c), mRNA.	NM_001107463	Rn01501898_m1	MTO	RGD1309258	XM_006231079.2;NM_001107463.1;XM_003749059.3;XM_006231033.2;XM_006231034.2;XM_006231035.2;XM_006231078.2	BC169040.1	Rat	152	No	No
	Vps37d	Rattus norvegicus VPS37D subunit of ESCRT-I (Vps37d), mRNA.	NM_001128193	Rn01500059_m1	MTO	-	NM_001128193.2	BC166560.1	Rat	71	Yes	No
ESCRT-II	Snf8	Rattus norvegicus SNF8 subunit of ESCRT-II (Snf8), mRNA.	NM_001007804	Rn01460691_m1	INV	D11moh34;RGD1310144	NM_001007804.1;XM_006247185.1	BC086364.1	Rat	105	Yes	Yes
	Vps25	Rattus norvegicus vacuolar protein sorting 25 homolog (Vps25), mRNA.	NM_001173451	Rn01751306_m1	MTO	-	NM_001173451.1	FQ233075.1;FQ213477.1;FQ220187.1;FQ229682.1	Rat	102	Yes	Yes
	Vps36	Rattus norvegicus vacuolar protein sorting 36 homolog (Vps36), mRNA.	NM_001106092	Rn01478764_m1	MTO	RGD1309754	NM_001106092.2	BC160860.1;FQ217181.1	Rat	53	Yes	No
ESCRT-III	Chmp2a	Rattus norvegicus charged multivesicular body protein 2A (Chmp2a), mRNA.	NM_001108906	Rn01401665_m1	MTO	RGD1305050	XM_006228118.1;XM_006228117.1;NM_001108906.1	FQ229914.1;FQ230074.1;FQ231147.1;FQ230732.1;FQ227339.1;BC167093.1;FQ222002.1;FQ231086.1;FQ233974.1	Rat	116	Yes	No
	Chmp2b	PREDICTED: Rattus norvegicus charged multivesicular body protein 2B (Chmp2b), mRNA.	XM_343995	Rn01402241_m1	MTO	RGD1306781	XM_343995.7	FQ212834.1	Rat	67	Yes	No
	Chmp3	Rattus norvegicus charged multivesicular body protein 3 (Chmp3), mRNA.	NM_172331	Rn00597295_m1	INV	Vps24	NM_172331.1;XM_006236631.2	FQ219218.1;AY150169.1;FQ234202.1;FQ215758.1	Rat	76	Yes	No
	CHMP4A	Homo sapiens charged multivesicular body protein 4A (CHMP4A), mRNA.	NM_014169	Hs00204331_m1	INV	C14orf123;CHMP4;CHMP4B;HSPC134;SHAX2;SNF7;SNF7-1;VPS32-1;VPS32A	NM_014169.3	BC113533.1;AF212243.1;BC107699.1;BC113535.1;AB100262.2;AF161483.1;AY329084.1;BC010893.1	Human	78	Yes	No
	Chmp4bl1	*Rattus norvegicus chromatin modifying protein 4B-like 1 (Chmp4bl1), mRNA.	*NM_001276456	Rn04419325_s1	MTO	-	NM_001276456.1	-	Rat	100	Yes	Yes
	Chmp4c	Rattus norvegicus charged multivesicular body protein 4C (Chmp4c), mRNA.	NM_001017466	Rn01461787_m1	INV	-	NM_001017466.2	BC092576.1	Rat	141	Yes	No
	Chmp6	Rattus norvegicus charged multivesicular body protein 6 (Chmp6), mRNA.	NM_001105856	Rn06436150_s1	MTO	RGD1565325	NM_001105856.1	BC070963.1	Rat	65	Yes	Yes
ESCRT-IV	Vps4a	Rattus norvegicus vacuolar protein sorting 4 homolog A (Vps4a), mRNA.	NM_145678	Rn00595538_m1	INV	-	NM_145678.1;XM_006255560.1	AB076398.1;FQ213218.1;BC070931.1	Rat	113	Yes	Yes
	Vps4b	Rattus norvegicus vacuolar protein sorting 4 homolog B (Vps4b), mRNA.	NM_001025716	Rn01426391_m1	INV	-	NM_001025716.1	BC099128.1	Rat	66	Yes	No
	Vta1	Rattus norvegicus vesicle trafficking 1 (Vta1), mRNA.	NM_001025640	Rn01440447_g1	INV	Lip5;RGD1305031	XM_006227646.2;NM_001025640.1	BC098787.1	Rat	76	Yes	Yes
ESCRT Independent	Cers2	Rattus norvegicus ceramide synthase 2 (Cers2), mRNA.	NM_001033700	Rn01762797_g1	INV	Lass2	NM_001033700.2;XM_006232887.2;XM_006232888.2	BC101876.1	Rat	81	Yes	No
	Cers3	Rattus norvegicus ceramide synthase 3 (Cers3), mRNA.	NM_001127561	Rn03648281_m1	MTO	Lass3;RGD1564356	NM_001127561.1	BC160913.1	Rat	64	Yes	No
	Cers4	Rattus norvegicus ceramide synthase 4 (Cers4), mRNA.	NM_001107117	Rn01767402_m1	MTO	Lass4	XM_006248804.2;XM_006248805.2;NM_001107117.1	-	Rat	57	Yes	No
	Cers5	Rattus norvegicus ceramide synthase 5 (Cers5), mRNA.	NM_001108993	Rn01532865_m1	MTO	Lass5	NM_001108993.1;XM_006257374.2;XM_006257375.2	BC166794.1	Rat	59	Yes	No
	Cers6	PREDICTED: Rattus norvegicus ceramide synthase 6 (Cers6), transcript variant X1, mRNA.	XM_006234308	Rn01747117_m1	INV	Lass6;RGD1561599	XM_345363.7;XM_006234308.2	-	Rat	66	Yes	No

## Sheet: Plate Layout Genes
	Plate Name:		ESCRT Bible
	1	2	3	4	5	6	7	8	9	10	11	12
A	18s	Ubap1	Vps36	Vps4a	18s	Ubap1	Vps36	Vps4a	18s	Ubap1	Vps36	Vps4a
B	Gapdh	Vps28	Chmp2a	Vps4b	Gapdh	Vps28	Chmp2a	Vps4b	Gapdh	Vps28	Chmp2a	Vps4b
C	Hgs	Vps37a	Chmp2b	Vta1	Hgs	Vps37a	Chmp2b	Vta1	Hgs	Vps37a	Chmp2b	Vta1
D	Stam	Vps37b	Chmp3	Cers2	Stam	Vps37b	Chmp3	Cers2	Stam	Vps37b	Chmp3	Cers2
E	Stam2	Vps37c	Chmp4a	Cers3	Stam2	Vps37c	Chmp4a	Cers3	Stam2	Vps37c	Chmp4a	Cers3
F	Mvb12a	Vps37d	Chmp4b	Cers4	Mvb12a	Vps37d	Chmp4b	Cers4	Mvb12a	Vps37d	Chmp4b	Cers4
G	Mvb12b	Snf8	Chmp4c	Cers5	Mvb12b	Snf8	Chmp4c	Cers5	Mvb12b	Snf8	Chmp4c	Cers5
H	Tsg101	Vps25	Chmp6	Cers6	Tsg101	Vps25	Chmp6	Cers6	Tsg101	Vps25	Chmp6	Cers6
	A1	18s	18s	18s	18s		A7	Vps36	VPS36	VPS36	VPS36
	B1	Gapdh	Gapdh	Gapdh	Gapdh		B7	Chmp2a	CHMP2A	CHMP2A	CHMP2A
	C1	Hgs	HGS	HGS	HGS		C7	Chmp2b	CHMP2A	CHMP2A	CHMP2A
	D1	Stam	STAM	STAM	STAM		D7	Chmp3	CHMP2A	CHMP2A	CHMP2A
	E1	Stam2	STAM2	STAM2	STAM2		E7	Chmp4a	CHMP4A	CHMP4A	CHMP4A
	F1	Mvb12a	MVB12A	MVB12A	MVB12A		F7	Chmp4b	CHMP4A	CHMP4A	CHMP4A
	G1	Mvb12b	MVB12B	MVB12B	MVB12B		G7	Chmp4c	CHMP4A	CHMP4A	CHMP4A
	H1	Tsg101	TSG101	TSG101	TSG101		H7	Chmp6	CHMP4A	CHMP4A	CHMP4A
	A2	Ubap1	UBAP1	UBAP1	UBAP1		A8	Vps4a	VPS4A	VPS4A	VPS4A
	B2	Vps28	VPS28	VPS28	VPS28		B8	Vps4b	VPS4B	VPS4B	VPS4B
	C2	Vps37a	VPS37A	VPS37A	VPS37A		C8	Vta1	VTA1	VTA1	VTA1
	D2	Vps37b	VPS37A	VPS37A	VPS37A		D8	Cers2	Cers2	Cers2	Cers2
	E2	Vps37c	VPS37A	VPS37A	VPS37A		E8	Cers3	Cers3	Cers3	Cers3
	F2	Vps37d	VPS37A	VPS37A	VPS37A		F8	Cers4	Cers4	Cers4	Cers4
	G2	Snf8	SNF8	SNF8	SNF8		G8	Cers5	Cers5	Cers5	Cers5
	H2	Vps25	VPS25	VPS25	VPS25		H8	Cers6	Cers6	Cers6	Cers6
	A3	Vps36	VPS36	VPS36	VPS36		A9	18s	18s	18s	18s
	B3	Chmp2a	CHMP2A	CHMP2A	CHMP2A		B9	Gapdh	Gapdh	Gapdh	Gapdh
	C3	Chmp2b	CHMP2A	CHMP2A	CHMP2A		C9	Hgs	HGS	HGS	HGS
	D3	Chmp3	CHMP2A	CHMP2A	CHMP2A		D9	Stam	STAM	STAM	STAM
	E3	Chmp4a	CHMP4A	CHMP4A	CHMP4A		E9	Stam2	STAM2	STAM2	STAM2
	F3	Chmp4b	CHMP4A	CHMP4A	CHMP4A		F9	Mvb12a	MVB12A	MVB12A	MVB12A
	G3	Chmp4c	CHMP4A	CHMP4A	CHMP4A		G9	Mvb12b	MVB12B	MVB12B	MVB12B
	H3	Chmp6	CHMP4A	CHMP4A	CHMP4A		H9	Tsg101	TSG101	TSG101	TSG101
	A4	Vps4a	VPS4A	VPS4A	VPS4A		A10	Ubap1	UBAP1	UBAP1	UBAP1
	B4	Vps4b	VPS4B	VPS4B	VPS4B		B10	Vps28	VPS28	VPS28	VPS28
	C4	Vta1	VTA1	VTA1	VTA1		C10	Vps37a	VPS37A	VPS37A	VPS37A
	D4	Cers2	Cers2	Cers2	Cers2		D10	Vps37b	VPS37A	VPS37A	VPS37A
	E4	Cers3	Cers3	Cers3	Cers3		E10	Vps37c	VPS37A	VPS37A	VPS37A
	F4	Cers4	Cers4	Cers4	Cers4		F10	Vps37d	VPS37A	VPS37A	VPS37A
	G4	Cers5	Cers5	Cers5	Cers5		G10	Snf8	SNF8	SNF8	SNF8
	H4	Cers6	Cers6	Cers6	Cers6		H10	Vps25	VPS25	VPS25	VPS25
	A5	18s	18s	18s	18s		A11	Vps36	VPS36	VPS36	VPS36
	B5	Gapdh	Gapdh	Gapdh	Gapdh		B11	Chmp2a	CHMP2A	CHMP2A	CHMP2A
	C5	Hgs	HGS	HGS	HGS		C11	Chmp2b	CHMP2A	CHMP2A	CHMP2A
	D5	Stam	STAM	STAM	STAM		D11	Chmp3	CHMP2A	CHMP2A	CHMP2A
	E5	Stam2	STAM2	STAM2	STAM2		E11	Chmp4a	CHMP4A	CHMP4A	CHMP4A
	F5	Mvb12a	MVB12A	MVB12A	MVB12A		F11	Chmp4b	CHMP4A	CHMP4A	CHMP4A
	G5	Mvb12b	MVB12B	MVB12B	MVB12B		G11	Chmp4c	CHMP4A	CHMP4A	CHMP4A
	H5	Tsg101	TSG101	TSG101	TSG101		H11	Chmp6	CHMP4A	CHMP4A	CHMP4A
	A6	Ubap1	UBAP1	UBAP1	UBAP1		A12	Vps4a	VPS4A	VPS4A	VPS4A
	B6	Vps28	VPS28	VPS28	VPS28		B12	Vps4b	VPS4B	VPS4B	VPS4B
	C6	Vps37a	VPS37A	VPS37A	VPS37A		C12	Vta1	VTA1	VTA1	VTA1
	D6	Vps37b	VPS37A	VPS37A	VPS37A		D12	Cers2	Cers2	Cers2	Cers2
	E6	Vps37c	VPS37A	VPS37A	VPS37A		E12	Cers3	Cers3	Cers3	Cers3
	F6	Vps37d	VPS37A	VPS37A	VPS37A		F12	Cers4	Cers4	Cers4	Cers4
	G6	Snf8	SNF8	SNF8	SNF8		G12	Cers5	Cers5	Cers5	Cers5
	H6	Vps25	VPS25	VPS25	VPS25		H12	Cers6	Cers6	Cers6	Cers6
